# Supplementary material for: Novel Flavonol Glycosides from the Aerial Parts of Lentil (Lens culinaris)
Source: MDPI journal article supplement (doi:10.3390/molecules191118152), 2014-11-06

# Supplementary Materials

## Compound 1

**Figure S1.** 1D  $^1\text{H}$ -NMR spectrum of compound **1** (methanol- $d_4$ , 500.18 MHz).

**Figure S2.** 1D  $^{13}\text{C}$ -NMR spectra ( $^1\text{H}$  decoupled and DEPT-135) (methanol- $d_4$ , 125.77 MHz).

**Figure S3.** 2D  $g$ -COSY NMR spectrum of compound **1** (methanol- $d_4$ , 500.18 MHz).

**Figure S4.** 2D TOCSY NMR spectrum of compound **1** (methanol- $d_4$ , 500.18 MHz).

**Figure S5.** 2D ROESY NMR spectrum of compound **1** (methanol- $d_4$ , 500.18 MHz).

**Figure S6.** 2D  $g$ -HSQC-NMR spectrum of compound **1** (methanol- $d_4$ , 500.18 MHz, 125.77 MHz).

**Figure S7.** 2D  $g$ -HSQC-TOCSY NMR spectrum of compound **1** (methanol- $d_4$ , 500.18 MHz, 125.77 MHz).

**Figure S8.** 2D  $g$ -HMBC-NMR spectrum of compound **1** (methanol- $d_4$ , 500.18 MHz, 125.77 MHz).

**Figure S9.** 1D TOCSY and 1D ROESY NMR subspectra of H-1( $7\text{-O-}\beta\text{-GlcA}$ ) in compound **1** (methanol- $d_4$ , 500.18 MHz).

**Figure S10.** 1D TOCSY and 1D ROESY NMR subspectra of H-1( $3\text{-O-}\beta\text{-Gal}$ ) in compound **1** (methanol- $d_4$ , 500.18 MHz).

**Figure S11.** 1D TOCSY and 1D ROESY NMR subspectra of H-1( $2^{\text{Gal}}\text{-O-}\beta\text{-Glc}$ ) in compound **1** (methanol- $d_4$ , 500.18 MHz).

## Compound 2

**Figure S12.** 1D  $^1\text{H}$ -NMR spectrum of compound **2** (methanol- $d_4$ , 500.18 MHz).

**Figure S13.** 1D  $^{13}\text{C}$ -NMR spectrum ( $^1\text{H}$  decoupled) of compound **2** (methanol- $d_4$ , 125.77 MHz).

**Figure S14.** 2D  $g$ -COSY NMR spectrum of compound **2** (methanol- $d_4$ , 500.18 MHz).

**Figure S15.** 2D TOCSY NMR spectrum of compound **2** (methanol- $d_4$ , 500.18 MHz).

**Figure S16.** 2D ROESY NMR spectrum of compound **2** (methanol- $d_4$ , 500.18 MHz).

**Figure S17.** 2D  $g$ -HSQC-NMR spectrum of compound **2** (methanol- $d_4$ , 500.18 MHz, 125.77 MHz).

**Figure S18.** 2D  $g$ -HSQC-TOCSY NMR spectrum of compound **2** (methanol- $d_4$ , 500.18 MHz, 125.77 MHz).

**Figure S19.** 2D  $g$ -HMBC-NMR spectrum of compound **2** (methanol- $d_4$ , 500.18 MHz, 125.77 MHz).

**Figure S20.** 1D TOCSY and 1D ROESY NMR subspectra of H-1( $7\text{-O-}\beta\text{-GlcA}$ ) in compound **2** (methanol- $d_4$ , 500.18 MHz).

**Figure S21.** 1D TOCSY and 1D ROESY NMR subspectra of H-1( $3\text{-O-}\beta\text{-Glc}$ ) in compound **2** (methanol- $d_4$ , 500.18 MHz).

**Figure S22.** 1D TOCSY and 1D ROESY NMR subspectra of H-1( $2^{\text{Glc}}\text{-O-}\beta\text{-Glc}$ ) in compound **2** (methanol- $d_4$ , 500.18 MHz).

## Compound 3

**Figure S23.** 1D  $^1\text{H}$ -NMR spectrum of compound **3** (methanol- $d_4$ , 500.18 MHz).

**Figure S24.** 1D  $^{13}\text{C}$ -NMR spectra ( $^1\text{H}$  decoupled and DEPT-135) of compound **3** (methanol- $d_4$ , 125.77 MHz).

**Figure S25.** 2D  $g$ -COSY NMR spectrum of compound **3** (methanol- $d_4$ , 500.18 MHz).

**Figure S26.** 2D TOCSY NMR spectrum of compound **3** (methanol- $d_4$ , 500.18 MHz).

**Figure S27.** 2D ROESY NMR spectrum of compound **3** (methanol-*d*<sub>4</sub>, 500.18 MHz).

**Figure S28.** 2D g-HSQC-NMR spectrum of compound **3** (methanol-*d*<sub>4</sub>, 500.18 MHz, 125.77 MHz).

**Figure S29.** 2D g-HSQC-TOCSY NMR spectrum of compound **3** (methanol-*d*<sub>4</sub>, 500.18 MHz, 125.77 MHz).

**Figure S30.** 2D g-HMBC-NMR spectrum of compound **3** (methanol-*d*<sub>4</sub>, 500.18 MHz, 125.77 MHz).

**Figure S31.** 1D TOCSY and 1D ROESY NMR subspectra of H-1(7-*O*-β-GlcA) in compound **3** (methanol-*d*<sub>4</sub>, 500.18 MHz).

**Figure S32.** 1D TOCSY and 1D ROESY NMR subspectra of H-1(3-*O*-β-Gal) in compound **3** (methanol-*d*<sub>4</sub>, 500.18 MHz).

**Figure S33.** 1D TOCSY and 1D ROESY NMR subspectra of H-1(2<sup>Gal</sup>-*O*-β-Glc) in compound **3** (methanol-*d*<sub>4</sub>, 500.18 MHz).

### Compound 4

**Figure S34.** 1D <sup>1</sup>H-NMR spectrum of compound **4** (methanol-*d*<sub>4</sub>, 500.18 MHz).

**Figure S35.** 1D <sup>13</sup>C-NMR spectra (1H decoupled and DEPT-135) of compound **4** (methanol-*d*<sub>4</sub>, 125.77 MHz).

**Figure S36.** 2D g-COSY NMR spectrum of compound **4** (methanol-*d*<sub>4</sub>, 500.18 MHz).

**Figure S37.** 2D TOCSY NMR spectrum of compound **4** (methanol-*d*<sub>4</sub>, 500.18 MHz).

**Figure S38.** 2D ROESY NMR spectrum of compound **4** (methanol-*d*<sub>4</sub>, 500.18 MHz).

**Figure S39.** 2D g-HSQC-NMR spectrum of compound **4** (methanol-*d*<sub>4</sub>, 500.18 MHz, 125.77 MHz).

**Figure S40.** 2D g-HSQC-TOCSY NMR spectrum of compound **4** (methanol-*d*<sub>4</sub>, 500.18 MHz, 125.77 MHz).

**Figure S41.** 2D g-HMBC-NMR spectrum of compound **4** (methanol-*d*<sub>4</sub>, 500.18 MHz, 125.77 MHz).

**Figure S42.** 1D TOCSY and 1D ROESY NMR subspectra of H-1(7-*O*-β-GlcA) and H-1(3-*O*-β-Gal) in compound **4** (methanol-*d*<sub>4</sub>, 500.18 MHz).

**Figure S43.** 1D TOCSY and 1D ROESY NMR subspectra of H-1(2<sup>Gal</sup>-*O*-β-Glc) in compound **4** (methanol-*d*<sub>4</sub>, 500.18 MHz).

### Compound 5

**Figure S44.** 1D <sup>1</sup>H-NMR spectrum of compound **5** (methanol-*d*<sub>4</sub>, 500.18 MHz).

**Figure S45.** 1D <sup>13</sup>C-NMR spectra (1H decoupled and DEPT-135) of compound **5** (methanol-*d*<sub>4</sub>, 125.77 MHz).

**Figure S46.** 2D g-COSY NMR spectrum of compound **5** (methanol-*d*<sub>4</sub>, 500.18 MHz).

**Figure S47.** 2D TOCSY NMR spectrum of compound **5** (methanol-*d*<sub>4</sub>, 500.18 MHz).

**Figure S48.** 2D ROESY NMR spectrum of compound **5** (methanol-*d*<sub>4</sub>, 500.18 MHz).

**Figure S49.** 2D g-HSQC-NMR spectrum of compound **5** (methanol-*d*<sub>4</sub>, 500.18 MHz, 125.77 MHz).

**Figure S50.** 2D g-HSQC-TOCSY NMR spectrum of compound **5** (methanol-*d*<sub>4</sub>, 500.18 MHz, 125.77 MHz).

**Figure S51.** 2D g-HMBC-NMR spectrum of compound **5** (methanol-*d*<sub>4</sub>, 500.18 MHz, 125.77 MHz).

**Figure S52.** 1D TOCSY and 1D ROESY NMR subspectra of H-1(7-*O*-β-GlcA) and H-1(3-*O*-β-Gal) in compound **5** (methanol-*d*<sub>4</sub>, 500.18 MHz).

**Figure S53.** 1D TOCSY and 1D ROESY NMR subspectra of H-1( $2^{\text{Gal}}$ -O- $\beta$ -Glc) in compound **5** (methanol- $d_4$ , 500.18 MHz).

### Compound 6

**Figure S54.** 1D  $^1\text{H}$ -NMR spectrum of compound **6** (methanol- $d_4$ , 500.18 MHz).

**Figure S55.** 1D  $^{13}\text{C}$ -NMR spectra (1H decoupled and DEPT-135) of compound **6** (methanol- $d_4$ , 125.77 MHz).

**Figure S56.** 2D g-COSY NMR spectrum of compound **6** (methanol- $d_4$ , 500.18 MHz).

**Figure S57.** 2D TOCSY NMR spectrum of compound **6** (methanol- $d_4$ , 500.18 MHz).

**Figure S58.** 2D ROESY NMR spectrum of compound **6** (methanol- $d_4$ , 500.18 MHz).

**Figure S59.** 2D g-HSQC-NMR spectrum of compound **6** (methanol- $d_4$ , 500.18 MHz, 125.77 MHz).

**Figure S60.** 2D g-HSQC-TOCSY NMR spectrum of compound **6** (methanol- $d_4$ , 500.18 MHz, 125.77 MHz).

**Figure S61.** 2D g-HMBC-NMR spectrum of compound **6** (methanol- $d_4$ , 500.18 MHz, 125.77 MHz).

**Figure S62.** 1D TOCSY and 1D ROESY NMR subspectra of H-1( $7\text{-O-}\beta\text{-GlcA}$ ) in compound **6** (methanol- $d_4$ , 500.18 MHz).

**Figure S63.** 1D TOCSY and 1D ROESY NMR subspectra of H-1( $3\text{-O-}\beta\text{-Gal}$ ) in compound **6** (methanol- $d_4$ , 500.18 MHz).

**Figure S64.** 1D TOCSY and 1D ROESY NMR subspectra of H-1( $2^{\text{Gal}}$ -O- $\beta$ -Glc) in compound **6** (methanol- $d_4$ , 500.18 MHz).

### Compound 7

**Figure S65.** 1D  $^1\text{H}$ -NMR spectrum of compound **7** (methanol- $d_4$ , 500.18 MHz).

**Figure S66.** 1D  $^{13}\text{C}$ -NMR spectra (1H decoupled and DEPT-135) of compound **7** (methanol- $d_4$ , 125.77 MHz).

**Figure S67.** 2D g-COSY NMR spectrum of compound **7** (methanol- $d_4$ , 500.18 MHz).

**Figure S68.** 2D TOCSY NMR spectrum of compound **7** (methanol- $d_4$ , 500.18 MHz).

**Figure S69.** 2D ROESY NMR spectrum of compound **7** (methanol- $d_4$ , 500.18 MHz).

**Figure S70.** 2D g-HSQC-NMR spectrum of compound **7** (methanol- $d_4$ , 500.18 MHz, 125.77 MHz).

**Figure S71.** 2D g-HSQC-TOCSY NMR spectrum of compound **7** (methanol- $d_4$ , 500.18 MHz, 125.77 MHz).

**Figure S72.** 2D g-HMBC-NMR spectrum of compound **7** (methanol- $d_4$ , 500.18 MHz, 125.77 MHz).

**Figure S73.** 1D TOCSY and 1D ROESY NMR subspectra of H-1( $7\text{-O-}\beta\text{-GlcA}$ ) in compound **7** (methanol- $d_4$ , 500.18 MHz).

**Figure S74.** 1D TOCSY and 1D ROESY NMR subspectra of H-1( $3\text{-O-}\beta\text{-Gal}$ ) in compound **7** (methanol- $d_4$ , 500.18 MHz).

**Figure S75.** 1D TOCSY and 1D ROESY NMR subspectra of H-1( $2^{\text{Gal}}$ -O- $\beta$ -Glc) in compound **7** (methanol- $d_4$ , 500.18 MHz).

**Figure S76.** 1D  $^1\text{H}$ -NMR spectrum of compound **8** (methanol- $d_4$ , 500.18 MHz).

**Compound 8**

**Figure S77.** 1D  $^{13}\text{C}$ -NMR spectra (1H decoupled and DEPT-135) of compound **8** (methanol- $d_4$ , 125.77 MHz).

**Figure S78.** 2D  $g$ -COSY NMR spectrum of compound **8** (methanol- $d_4$ , 500.18 MHz).

**Figure S79.** 2D TOCSY NMR spectrum of compound **8** (methanol- $d_4$ , 500.18 MHz).

**Figure S80.** 2D ROESY NMR spectrum of compound **8** (methanol- $d_4$ , 500.18 MHz).

**Figure S81.** 2D  $g$ -HSQC-NMR spectrum of compound **8** (methanol- $d_4$ , 500.18 MHz, 125.77 MHz).

**Figure S82.** 2D  $g$ -HSQC-TOCSY NMR spectrum of compound **8** (methanol- $d_4$ , 500.18 MHz, 125.77 MHz).

**Figure S83.** 2D  $g$ -HMBC-NMR spectrum of compound **8** (methanol- $d_4$ , 500.18 MHz, 125.77 MHz).

**Figure S84.** 1D TOCSY and 1D ROESY NMR subspectra of H-1( $7\text{-O-}\beta\text{-GlcA}$ ) in compound **8** (methanol- $d_4$ , 500.18 MHz).

**Figure S85.** 1D TOCSY and 1D ROESY NMR subspectra of H-1( $3\text{-O-}\beta\text{-Gal}$ ) in compound **8** (methanol- $d_4$ , 500.18 MHz).

**Figure S86.** 1D TOCSY and 1D ROESY NMR subspectra of H-1( $2^{\text{Gal}}\text{-O-}\beta\text{-Glc}$ ) in compound **8** (methanol- $d_4$ , 500.18 MHz).

**Compound 9**

**Figure S87.** 1D  $^1\text{H}$ -NMR spectrum of compound **9** (methanol- $d_4$ , 500.18 MHz).

**Figure S88.** 1D  $^{13}\text{C}$ -NMR spectra (1H decoupled and DEPT-135) of compound **9** (methanol- $d_4$ , 125.77 MHz).

**Figure S89.** 2D  $g$ -COSY NMR spectrum of compound **9** (methanol- $d_4$ , 500.18 MHz).

**Figure S90.** 2D TOCSY NMR spectrum of compound **9** (methanol- $d_4$ , 500.18 MHz).

**Figure S91.** 2D ROESY NMR spectrum of compound **9** (methanol- $d_4$ , 500.18 MHz).

**Figure S92.** 2D  $g$ -HSQC-NMR spectrum of compound **9** (methanol- $d_4$ , 500.18 MHz, 125.77 MHz).

**Figure S93.** 2D  $g$ -HSQC-TOCSY NMR spectrum of compound **9** (methanol- $d_4$ , 500.18 MHz, 125.77 MHz).

**Figure S94.** 2D  $g$ -HMBC-NMR spectrum of compound **9** (methanol- $d_4$ , 500.18 MHz, 125.77 MHz).

**Figure S95.** 1D TOCSY and 1D ROESY NMR subspectra of H-1( $7\text{-O-}\beta\text{-GlcA}$ ) in compound **9** (methanol- $d_4$ , 500.18 MHz).

**Figure S96.** 1D TOCSY and 1D ROESY NMR subspectra of H-1( $3\text{-O-}\beta\text{-Gal}$ ) in compound **9** (methanol- $d_4$ , 500.18 MHz).

**Figure S97.** 1D TOCSY and 1D ROESY NMR subspectra of H-1( $2^{\text{Gal}}\text{-O-}\beta\text{-Glc}$ ) in compound **9** (methanol- $d_4$ , 500.18 MHz).

**Compound 10**

**Figure S98.** 1D  $^1\text{H}$ -NMR spectrum of compound **10** (methanol- $d_4$ , 500.18 MHz).

**Figure S99.** 1D  $^{13}\text{C}$ -NMR spectra (1H decoupled and DEPT-135) of compound **10** (methanol- $d_4$ , 125.77 MHz).

**Figure S100.** 2D  $g$ -COSY NMR spectrum of compound **10** (methanol- $d_4$ , 500.18 MHz).



**Figure S101.** 2D TOCSY NMR spectrum of compound **10** (methanol-*d*<sub>4</sub>, 500.18 MHz).

**Figure S102.** 2D ROESY NMR spectrum of compound **10** (methanol-*d*<sub>4</sub>, 500.18 MHz).

**Figure S103.** 2D g-HSQC-NMR spectrum of compound **10** (methanol-*d*<sub>4</sub>, 500.18 MHz, 125.77 MHz).

**Figure S104.** 2D g-HSQC-TOCSY NMR spectrum of compound **10** (methanol-*d*<sub>4</sub>, 500.18 MHz, 125.77 MHz).

**Figure S105.** 2D g-HMBC-NMR spectrum of compound **10** (methanol-*d*<sub>4</sub>, 500.18 MHz, 125.77 MHz).

**Figure S106.** 1D TOCSY and 1D ROESY NMR subspectra of H-1<sub>(7-O-β-GlcA)</sub> in compound **10** (methanol-*d*<sub>4</sub>, 500.18 MHz).

**Figure S107.** 1D TOCSY and 1D ROESY NMR subspectra of H-1<sub>(3-O-β-Gal)</sub> in compound **10** (methanol-*d*<sub>4</sub>, 500.18 MHz).

**Figure S108.** 1D TOCSY and 1D ROESY NMR subspectra of H-1<sub>(2<sup>Gal</sup>-O-β-Glc)</sub> in compound **10** (methanol-*d*<sub>4</sub>, 500.18 MHz).

## Compound 11

**Figure S109.** 1D <sup>1</sup>H-NMR spectrum of compound **11** (methanol-*d*<sub>4</sub>, 500.18 MHz).

**Figure S110.** 1D <sup>13</sup>C-NMR spectra (1H decoupled and DEPT-135) of compound **11** (methanol-*d*<sub>4</sub>, 125.77 MHz).

**Figure S111.** 2D g-COSY NMR spectrum of compound **11** (methanol-*d*<sub>4</sub>, 500.18 MHz).

**Figure S112.** 2D TOCSY NMR spectrum of compound **11** (methanol-*d*<sub>4</sub>, 500.18 MHz).

**Figure S113.** 2D ROESY NMR spectrum of compound **11** (methanol-*d*<sub>4</sub>, 500.18 MHz).

**Figure S114.** 2D g-HSQC-NMR spectrum of compound **11** (methanol-*d*<sub>4</sub>, 500.18 MHz, 125.77 MHz).

**Figure S115.** 2D g-HSQC-TOCSY NMR spectrum of compound **11** (methanol-*d*<sub>4</sub>, 500.18 MHz, 125.77 MHz).

**Figure S116.** 2D g-HMBC-NMR spectrum of compound **11** (methanol-*d*<sub>4</sub>, 500.18 MHz, 125.77 MHz).

**Figure S117.** 1D TOCSY and 1D ROESY NMR subspectra of H-1<sub>(7-O-α-Rha)</sub> and H-6<sub>(7-O-α-Rha)</sub> in compound **11** (methanol-*d*<sub>4</sub>, 500.18 MHz).

**Figure S118.** 1D TOCSY and 1D ROESY NMR subspectra of H-1<sub>(3-O-β-Gal)</sub> in compound **11** (methanol-*d*<sub>4</sub>, 500.18 MHz).

**Figure S119.** 1D TOCSY and 1D ROESY NMR subspectra of H-1<sub>(2<sup>Gal</sup>-O-β-Glc)</sub> in compound **11** (methanol-*d*<sub>4</sub>, 500.18 MHz).

**Figure S120.** 1D TOCSY and 1D ROESY NMR subspectra of H-1<sub>(6<sup>Gal</sup>-O-α-Rha)</sub> and H-6<sub>(6<sup>Gal</sup>-O-α-Rha)</sub> in compound **11** (methanol-*d*<sub>4</sub>, 500.18 MHz).

## Compound 12

**Figure S121.** 1D <sup>1</sup>H-NMR spectrum of compound **12** (methanol-*d*<sub>4</sub>, 500.18 MHz).

**Figure S122.** 1D <sup>13</sup>C-NMR spectra (1H decoupled and DEPT-135) of compound **12** (methanol-*d*<sub>4</sub>, 125.77 MHz).

**Figure S123.** 2D g-COSY NMR spectrum of compound **12** (methanol-*d*<sub>4</sub>, 500.18 MHz).

**Figure S124.** 2D TOCSY NMR spectrum of compound **12** (methanol-*d*<sub>4</sub>, 500.18 MHz).

**Figure S125.** 2D ROESY NMR spectrum of compound **12** (methanol-*d*<sub>4</sub>, 500.18 MHz).

**Figure S126.** 2D *g*-HSQC-NMR spectrum of compound **12** (methanol-*d*<sub>4</sub>, 500.18 MHz, 125.77 MHz).

**Figure S127.** 2D *g*-HSQC-TOCSY NMR spectrum of compound **12** (methanol-*d*<sub>4</sub>, 500.18 MHz, 125.77 MHz).

**Figure S128.** 2D *g*-HMBC-NMR spectrum of compound **12** (methanol-*d*<sub>4</sub>, 500.18 MHz, 125.77 MHz).

**Figure S129.** 1D TOCSY and 1D ROESY NMR subspectra of H-1<sub>(7-*O*-β-GlcA)</sub> in compound **12** (methanol-*d*<sub>4</sub>, 500.18 MHz).

**Figure S130.** 1D TOCSY NMR subspectrum of H-2<sub>(3-*O*-β-Gal)</sub> in compound **12** (methanol-*d*<sub>4</sub>, 500.18 MHz).

**Figure S131.** 1D TOCSY and 1D ROESY NMR subspectra of H-1<sub>(2<sup>Gal</sup>-*O*-β-Glc)</sub> in compound **12** (methanol-*d*<sub>4</sub>, 500.18 MHz).

### Compound 13

**Figure S132.** 1D <sup>1</sup>H-NMR spectrum of compound **13** (methanol-*d*<sub>4</sub>, 500.18 MHz).

**Figure S133.** 1D <sup>13</sup>C-NMR spectra (1H decoupled and DEPT-135) of compound **13** (methanol-*d*<sub>4</sub>, 125.77 MHz).

**Figure S134.** 2D *g*-COSY NMR spectrum of compound **13** (methanol-*d*<sub>4</sub>, 500.18 MHz).

**Figure S135.** 2D TOCSY NMR spectrum of compound **13** (methanol-*d*<sub>4</sub>, 500.18 MHz).

**Figure S136.** 2D ROESY NMR spectrum of compound **13** (methanol-*d*<sub>4</sub>, 500.18 MHz).

**Figure S137.** 2D *g*-HSQC-NMR spectrum of compound **13** (methanol-*d*<sub>4</sub>, 500.18 MHz, 125.77 MHz).

**Figure S138.** 2D *g*-HSQC-TOCSY NMR spectrum of compound **13** (methanol-*d*<sub>4</sub>, 500.18 MHz, 125.77 MHz).

**Figure S139.** 2D *g*-HMBC-NMR spectrum of compound **13** (methanol-*d*<sub>4</sub>, 500.18 MHz, 125.77 MHz).

**Figure S140.** 1D TOCSY and 1D ROESY NMR subspectra of H-1<sub>(7-*O*-β-GlcA)</sub> in compound **13** (methanol-*d*<sub>4</sub>, 500.18 MHz).

**Figure S141.** 1D TOCSY and 1D ROESY NMR subspectra of H-1<sub>(3-*O*-β-Gal)</sub> in compound **13** (methanol-*d*<sub>4</sub>, 500.18 MHz).

**Figure S142.** 1D TOCSY and 1D ROESY NMR subspectra of H-1<sub>(2<sup>Gal</sup>-*O*-β-Glc)</sub> in compound **13** (methanol-*d*<sub>4</sub>, 500.18 MHz).

### Compound 14

**Figure S143.** 1D <sup>1</sup>H-NMR spectrum of compound **14** (methanol-*d*<sub>4</sub>, 500.18 MHz).

**Figure S144.** 1D <sup>13</sup>C-NMR spectra (1H decoupled and DEPT-135) of compound **14** (methanol-*d*<sub>4</sub>, 125.77 MHz).

**Figure S145.** 2D *g*-COSY NMR spectrum of compound **14** (methanol-*d*<sub>4</sub>, 500.18 MHz).

**Figure S146.** 2D TOCSY NMR spectrum of compound **14** (methanol-*d*<sub>4</sub>, 500.18 MHz).

**Figure S147.** 2D ROESY NMR spectrum of compound **14** (methanol-*d*<sub>4</sub>, 500.18 MHz).

**Figure S148.** 2D *g*-HSQC-NMR spectrum of compound **14** (methanol-*d*<sub>4</sub>, 500.18 MHz, 125.77 MHz).

**Figure S149.** 2D g-HSQC-TOCSY NMR spectrum of compound **14** (methanol-*d*<sub>4</sub>, 500.18 MHz, 125.77 MHz).

**Figure S150.** 2D g-HMBC-NMR spectrum of compound **14** (methanol-*d*<sub>4</sub>, 500.18 MHz, 125.77 MHz).

**Figure S151.** 1D TOCSY and 1D ROESY NMR subspectra of H-1<sub>(7-O-β-GlcA)</sub> in compound **14** (methanol-*d*<sub>4</sub>, 500.18 MHz).

**Figure S152.** 1D TOCSY and 1D ROESY NMR subspectra of H-1<sub>(3-O-β-Gal)</sub> in compound **14** (methanol-*d*<sub>4</sub>, 500.18 MHz).

**Figure S153.** 1D TOCSY and 1D ROESY NMR subspectra of H-1<sub>(2<sup>Gal</sup>-O-β-Glc)</sub> in compound **14** (methanol-*d*<sub>4</sub>, 500.18 MHz).

### Compound 15

**Figure S154.** 1D <sup>1</sup>H-NMR spectrum of compound **15** (methanol-*d*<sub>4</sub>, 500.18 MHz).

**Figure S155.** 1D <sup>13</sup>C-NMR spectra (1H decoupled and DEPT-135) of compound **15** (methanol-*d*<sub>4</sub>, 125.77 MHz).

**Figure S156.** 2D g-COSY NMR spectrum of compound **15** (methanol-*d*<sub>4</sub>, 500.18 MHz).

**Figure S157.** 2D TOCSY NMR spectrum of compound **15** (methanol-*d*<sub>4</sub>, 500.18 MHz).

**Figure S158.** 2D ROESY NMR spectrum of compound **15** (methanol-*d*<sub>4</sub>, 500.18 MHz).

**Figure S159.** 2D g-HSQC-NMR spectrum of compound **15** (methanol-*d*<sub>4</sub>, 500.18 MHz, 125.77 MHz).

**Figure S160.** 2D g-HSQC-TOCSY NMR spectrum of compound **15** (methanol-*d*<sub>4</sub>, 500.18 MHz, 125.77 MHz).

**Figure S161.** 2D g-HMBC-NMR spectrum of compound **15** (methanol-*d*<sub>4</sub>, 500.18 MHz, 125.77 MHz).

**Figure S162.** 1D TOCSY and 1D ROESY NMR subspectra of H-1<sub>(7-O-β-GlcA)</sub> in compound **15** (methanol-*d*<sub>4</sub>, 500.18 MHz).

**Figure S163.** 1D TOCSY NMR subspectrum of H-2<sub>(3-O-β-Gal)</sub> in compound **15** (methanol-*d*<sub>4</sub>, 500.18 MHz).

**Figure S164.** 1D TOCSY and 1D ROESY NMR subspectra of H-1<sub>(2<sup>Gal</sup>-O-β-Glc)</sub> in compound **15** (methanol-*d*<sub>4</sub>, 500.18 MHz).

### Compound 16

**Figure S165.** 1D <sup>1</sup>H-NMR spectrum of compound **16** (methanol-*d*<sub>4</sub>, 500.18 MHz).

**Figure S166.** 1D <sup>13</sup>C-NMR spectra (1H decoupled and DEPT-135) of compound **16** (methanol-*d*<sub>4</sub>, 125.77 MHz).

**Figure S167.** 2D g-COSY NMR spectrum of compound **16** (methanol-*d*<sub>4</sub>, 500.18 MHz).

**Figure S168.** 2D ROESY NMR spectrum of compound **16** (methanol-*d*<sub>4</sub>, 500.18 MHz).

**Figure S169.** 2D g-HSQC-NMR spectrum of compound **16** (methanol-*d*<sub>4</sub>, 500.18 MHz, 125.77 MHz).

**Figure S170.** 2D g-HMBC-NMR spectrum of compound **16** (methanol-*d*<sub>4</sub>, 500.18 MHz, 125.77 MHz).

**Figure S171.** 1D TOCSY and 1D ROESY NMR subspectra of H-1<sub>(3-O-α-Rha)</sub> and H-6<sub>(3-O-α-Rha)</sub> in compound **16** (methanol-*d*<sub>4</sub>, 500.18 MHz).

## Compound 17

**Figure S172.** 1D  $^1\text{H}$ -NMR spectrum of compound **17** (methanol- $d_4$ , 500.18 MHz).

**Figure S173.** 1D  $^{13}\text{C}$ -NMR spectra (1H decoupled and DEPT-135) of compound **17** (methanol- $d_4$ , 125.77 MHz).

**Figure S174.** 2D g-COSY NMR spectrum of compound **17** (methanol- $d_4$ , 500.18 MHz).

**Figure S175.** 2D TOCSY NMR spectrum of compound **17** (methanol- $d_4$ , 500.18 MHz).

**Figure S176.** 2D ROESY NMR spectrum of compound **17** (methanol- $d_4$ , 500.18 MHz).

**Figure S177.** 2D g-HSQC-NMR spectrum of compound **17** (methanol- $d_4$ , 500.18 MHz, 125.77 MHz).

**Figure S178.** 2D g-HSQC-TOCSY NMR spectrum of compound **17** (methanol- $d_4$ , 500.18 MHz, 125.77 MHz).

**Figure S179.** 2D g-HMBC-NMR spectrum of compound **17** (methanol- $d_4$ , 500.18 MHz, 125.77 MHz).

**Figure S180.** 1D TOCSY and 1D ROESY NMR subspectra of H-1( $7\text{-O-}\beta\text{-GlcA}$ ) in compound **17** (methanol- $d_4$ , 500.18 MHz).

**Figure S181.** 1D TOCSY subspectrum of H-2( $3\text{-O-}\beta\text{-Gal}$ ) in compound **17** (methanol- $d_4$ , 500.18 MHz).

**Figure S182.** 1D TOCSY and 1D ROESY NMR subspectra of H-1( $2^{\text{Gal}}\text{-O-}\beta\text{-Glc}$ ) in compound **17** (methanol- $d_4$ , 500.18 MHz).

## Compound 18

**Figure S183.** 1D  $^1\text{H}$ -NMR spectrum of compound **18** (methanol- $d_4$ , 500.18 MHz).

**Figure S184.** 1D  $^{13}\text{C}$ -NMR spectra (1H decoupled and DEPT-135) of compound **18** (methanol- $d_4$ , 125.77 MHz).

**Figure S185.** 2D g-COSY NMR spectrum of compound **18** (methanol- $d_4$ , 500.18 MHz).

**Figure S186.** 2D TOCSY NMR spectrum of compound **18** (methanol- $d_4$ , 500.18 MHz).

**Figure S187.** 2D ROESY NMR spectrum of compound **18** (methanol- $d_4$ , 500.18 MHz).

**Figure S188.** 2D g-HSQC-NMR spectrum of compound **18** (methanol- $d_4$ , 500.18 MHz, 125.77 MHz).

**Figure S189.** 2D g-HSQC-TOCSY NMR spectrum of compound **18** (methanol- $d_4$ , 500.18 MHz, 125.77 MHz).

**Figure S190.** 2D g-HMBC-NMR spectrum of compound **18** (methanol- $d_4$ , 500.18 MHz, 125.77 MHz).

**Figure S191.** 1D TOCSY and 1D ROESY NMR subspectra of H-1( $7\text{-O-}\beta\text{-GlcA}$ ) in compound **18** (methanol- $d_4$ , 500.18 MHz).

**Figure S192.** 1D TOCSY and 1D ROESY NMR subspectra of H-1( $3\text{-O-}\beta\text{-Gal}$ ) in compound **18** (methanol- $d_4$ , 500.18 MHz).

**Figure S193.** 1D TOCSY and 1D ROESY NMR subspectra of H-1( $2^{\text{Gal}}\text{-O-}\beta\text{-Glc}$ ) in compound **18** (methanol- $d_4$ , 500.18 MHz).

**Figure S194.** UPLC-MS chromatograms of phenolic acid reference standards.

**Figure S195.** UPLC-MS chromatograms of phenolic acids released during alkaline hydrolysis of the compound **4**.

**Figure S196.** The UV spectrum of the putative 3,4,5-trihydroxycinnamic acid.

**Figure S197.** UPLC-MS chromatograms of phenolic acids released during alkaline hydrolysis of the compound 5.

**Figure S198.** UPLC-MS chromatograms of phenolic acids released during alkaline hydrolysis of the compound 6.

**Figure S199.** UPLC-MS chromatograms of phenolic acids released during alkaline hydrolysis of the compound 7.

**Figure S200.** UPLC-MS chromatograms of phenolic acids released during alkaline hydrolysis of the compound 8.

**Figure S201.** UPLC-MS chromatograms of phenolic acids released during alkaline hydrolysis of the compound 9.

**Figure S202.** UPLC-MS chromatograms of phenolic acids released during alkaline hydrolysis of the compound 10.

**Figure S203.** UPLC-MS chromatograms of phenolic acids released during alkaline hydrolysis of the compound 11.

**Figure S204.** UPLC-MS chromatograms of phenolic acids released during alkaline hydrolysis of the compound 12.

**Figure S205.** UPLC-MS chromatograms of phenolic acids released during alkaline hydrolysis of the compound 13.

**Figure S206.** UPLC-MS chromatograms of phenolic acids released during alkaline hydrolysis of the compound 14.

**Figure S207.** UPLC-MS chromatograms of phenolic acids released during alkaline hydrolysis of the compound 15.

**Figure S208.** UPLC-MS chromatograms of phenolic acids released during alkaline hydrolysis of the compound 17.

**Figure S209.** UPLC-MS chromatograms of phenolic acids released during alkaline hydrolysis of the compound 18.

**Figure S210.** UPLC-MS chromatograms of the sugar standards.

**Figure S211.** UPLC-MS chromatograms of sugars released during the acid hydrolysis of the compound 1.

**Figure S212.** UPLC-MS chromatograms of sugars released during the acid hydrolysis of the compound 3.

**Figure S213.** UPLC-MS chromatograms of sugars released during the acid hydrolysis of the compound 4.

**Figure S214.** UPLC-MS chromatograms of sugars released during the acid hydrolysis of the compound 5.

**Figure S215.** UPLC-MS chromatograms of sugars released during the acid hydrolysis of the compound 6.

**Figure S216.** UPLC-MS chromatograms of sugars released during the acid hydrolysis of the compound 7.

**Figure S217.** UPLC-MS chromatograms of sugars released during the acid hydrolysis of the compound 8.

**Figure S218.** UPLC-MS chromatograms of sugars released during the acid hydrolysis of the compound **9**.

**Figure S219.** UPLC-MS chromatograms of sugars released during the acid hydrolysis of the compound **10**.

**Figure S220.** UPLC-MS chromatograms of sugars released during the acid hydrolysis of the compound **11**.

**Figure S221.** UPLC-MS chromatograms of sugars released during the acid hydrolysis of the compound **12**.

**Figure S222.** UPLC-MS chromatograms of sugars released during the acid hydrolysis of the compound **13**.

**Figure S223.** UPLC-MS chromatograms of sugars released during the acid hydrolysis of the compound **14**.

**Figure S224.** UPLC-MS chromatograms of sugars released during the acid hydrolysis of the compound **15**.

**Figure S225.** UPLC-MS chromatograms of sugars released during the acid hydrolysis of the compound **17**.

**Figure S226.** UPLC-MS chromatograms of sugars released during the acid hydrolysis of the compound **18**.

**Figure S227.** UPLC-MS chromatograms of the methanol extract of lentil seeds (var. Tina), and the UV spectrum of the dominant phenolic compound.

## Compound 1

Figure S1. 1D  $^1\text{H}$ -NMR spectrum of compound 1 (methanol- $d_4$ , 500.18 MHz).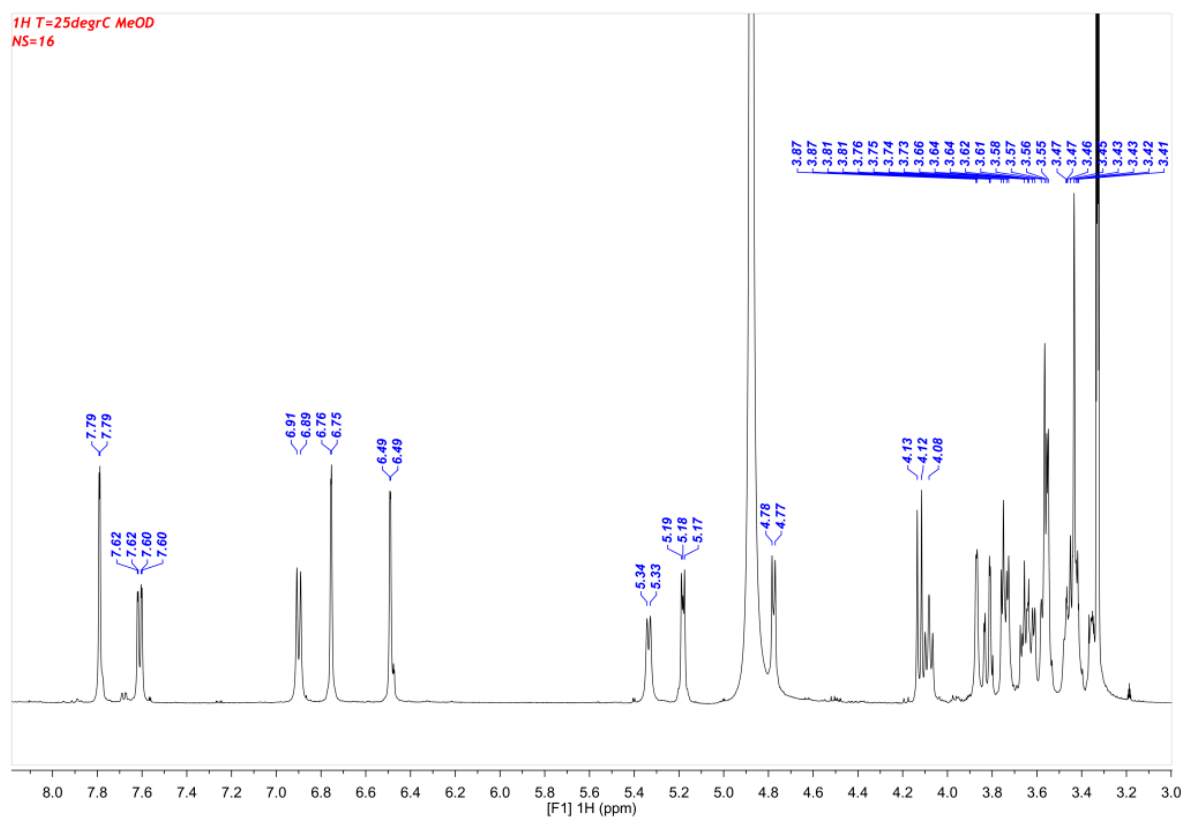Figure S2. 1D  $^{13}\text{C}$ -NMR spectra ( $^1\text{H}$  decoupled and DEPT-135) (methanol- $d_4$ , 125.77 MHz).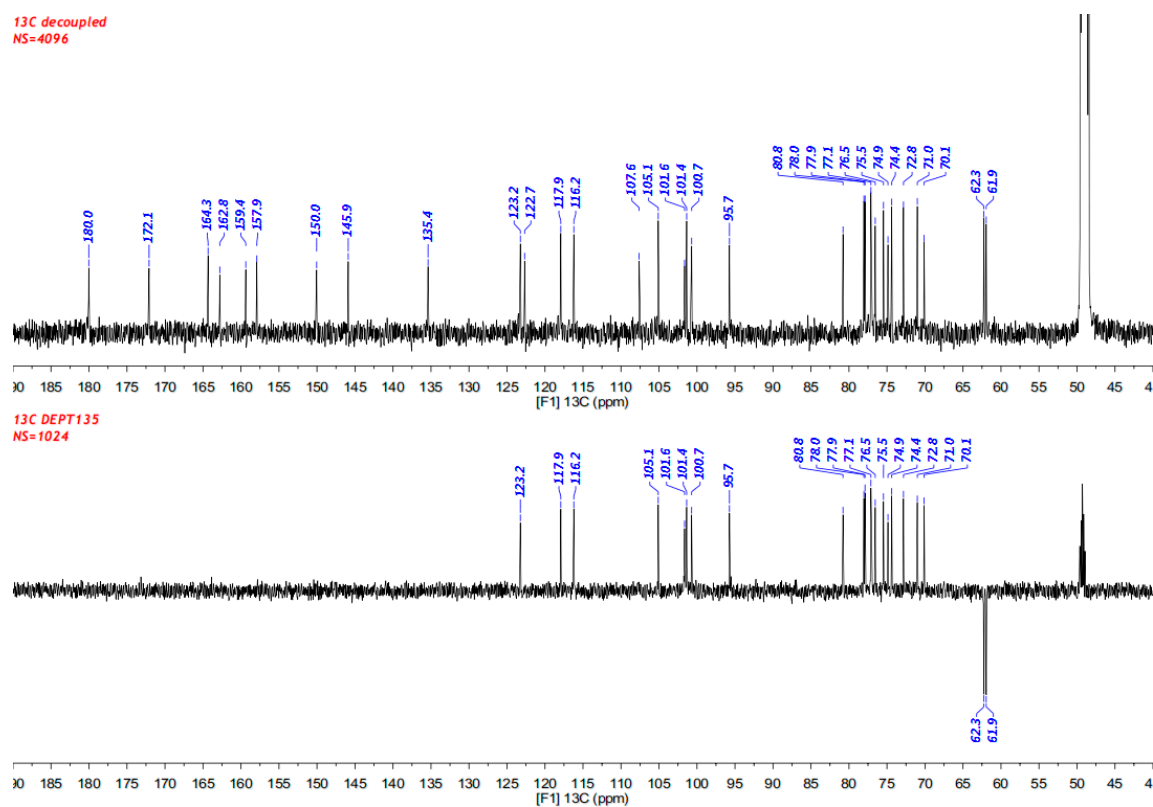

**Figure S3.** 2D g-COSY NMR spectrum of compound **1** (methanol- $d_4$ , 500.18 MHz).

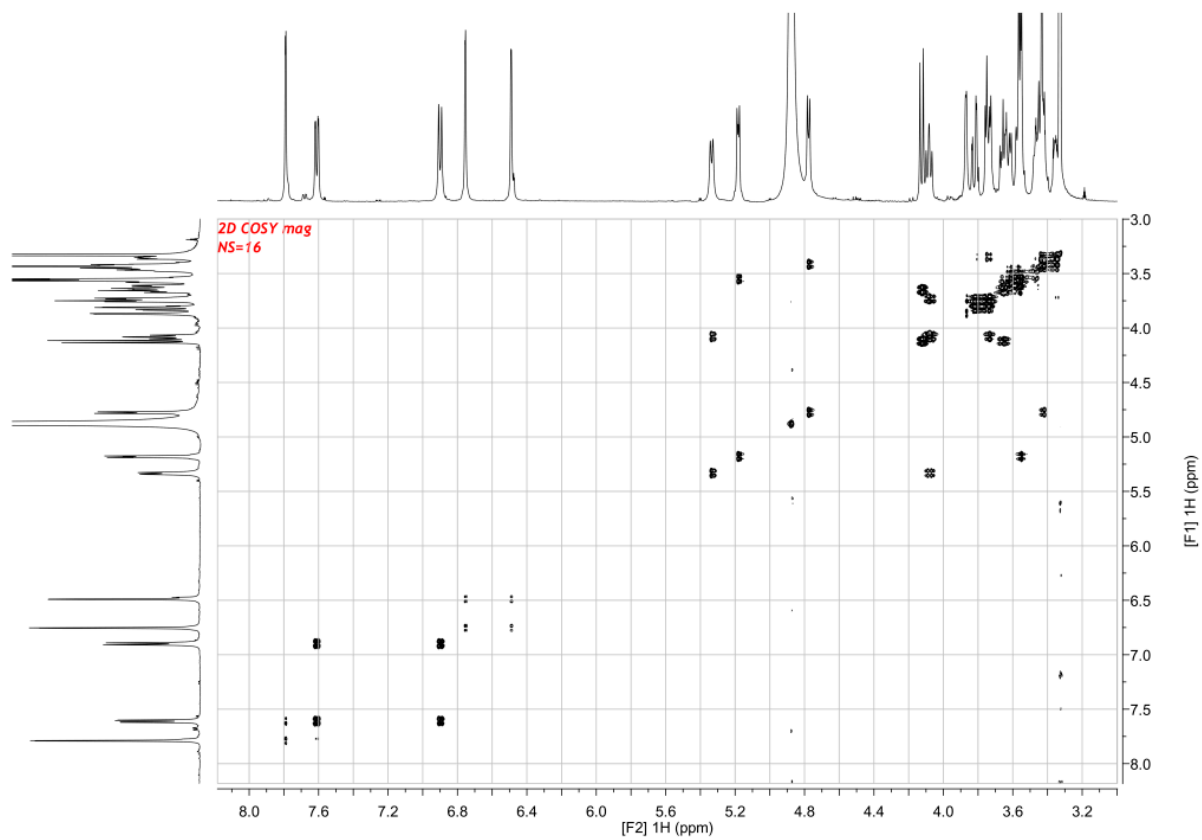

**Figure S4.** 2D TOCSY NMR spectrum of compound **1** (methanol- $d_4$ , 500.18 MHz).

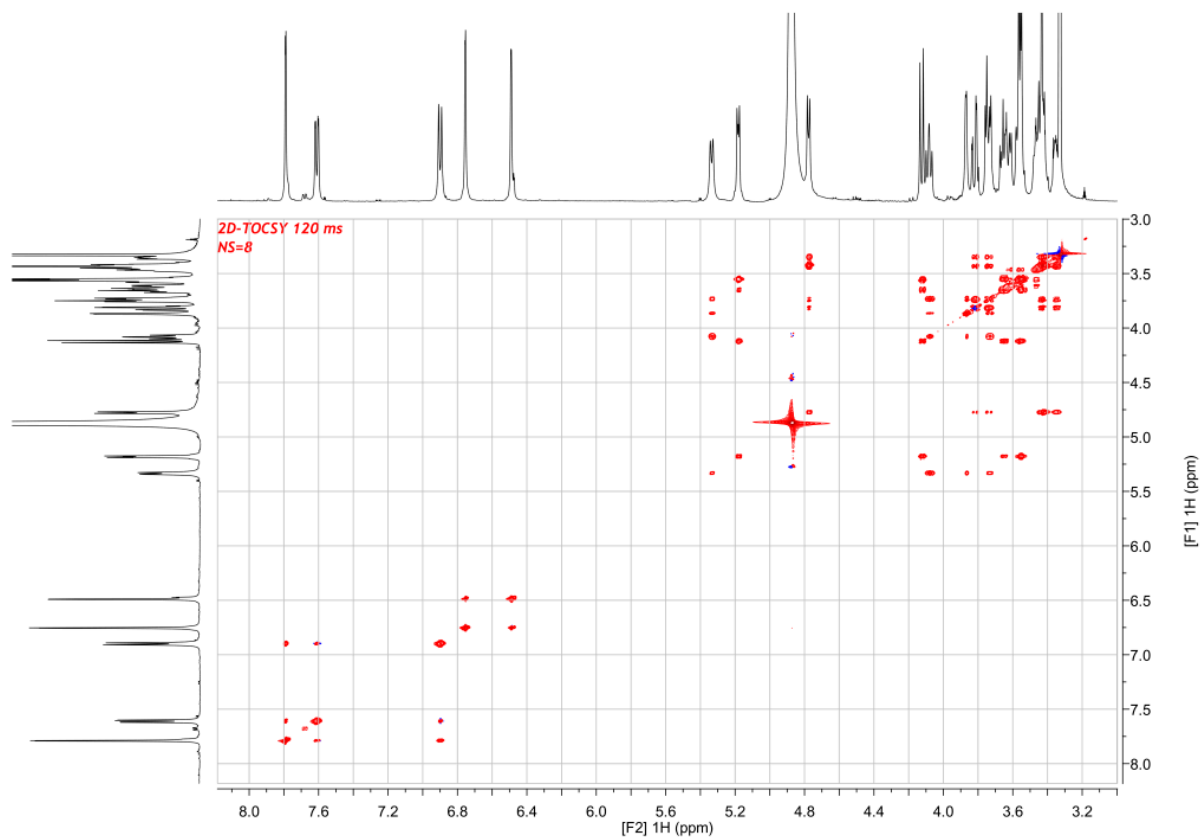



**Figure S5.** 2D ROESY NMR spectrum of compound **1** (methanol- $d_4$ , 500.18 MHz).

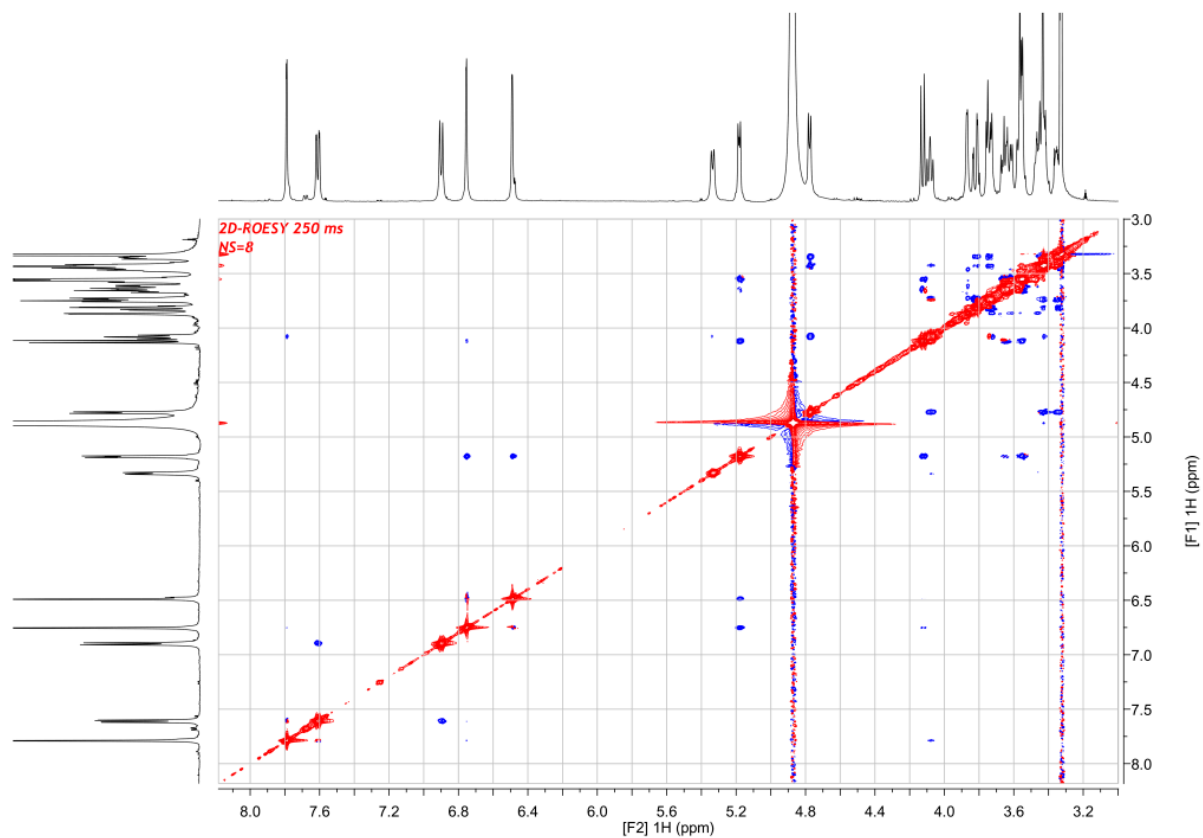

**Figure S6.** 2D g-HSQC-NMR spectrum of compound **1** (methanol- $d_4$ , 500.18 MHz, 125.77 MHz).

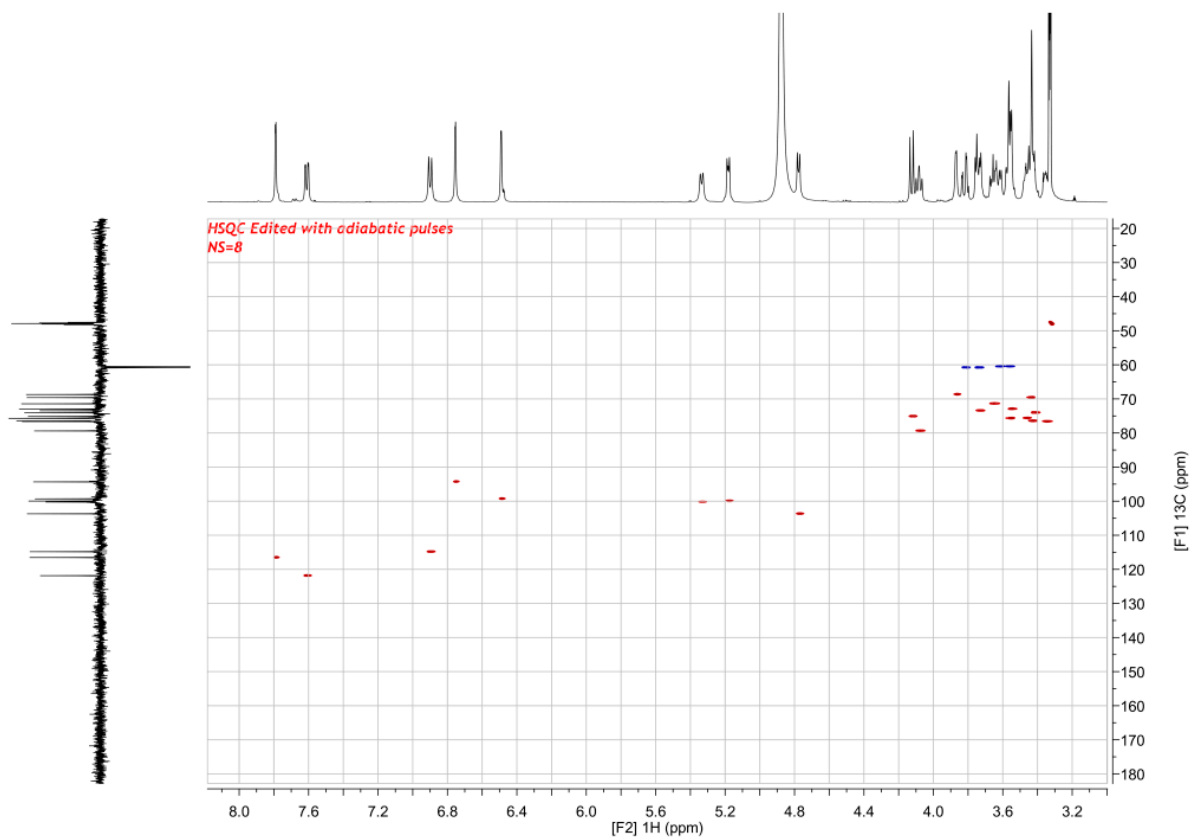

**Figure S7.** 2D g-HSQC-TOCSY NMR spectrum of compound **1** (methanol- $d_4$ , 500.18 MHz, 125.77 MHz).

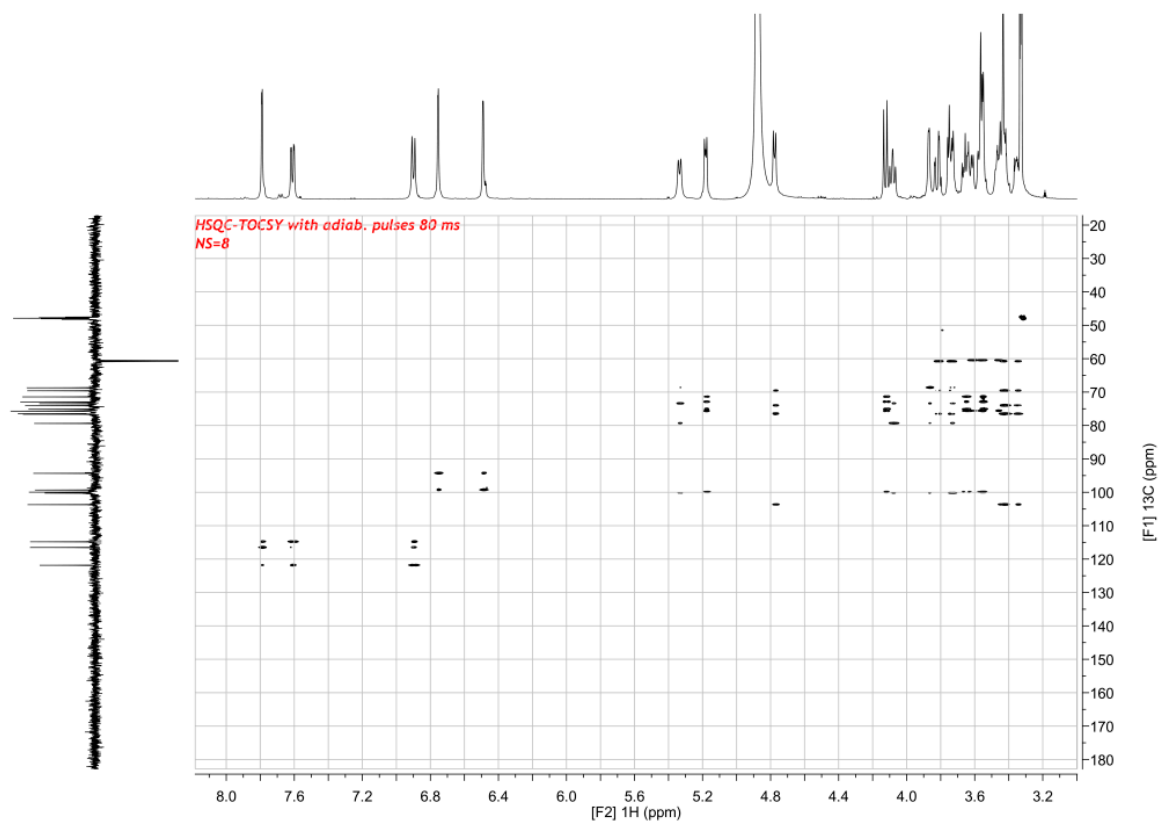

**Figure S8.** 2D g-HMBC-NMR spectrum of compound **1** (methanol- $d_4$ , 500.18 MHz, 125.77 MHz).

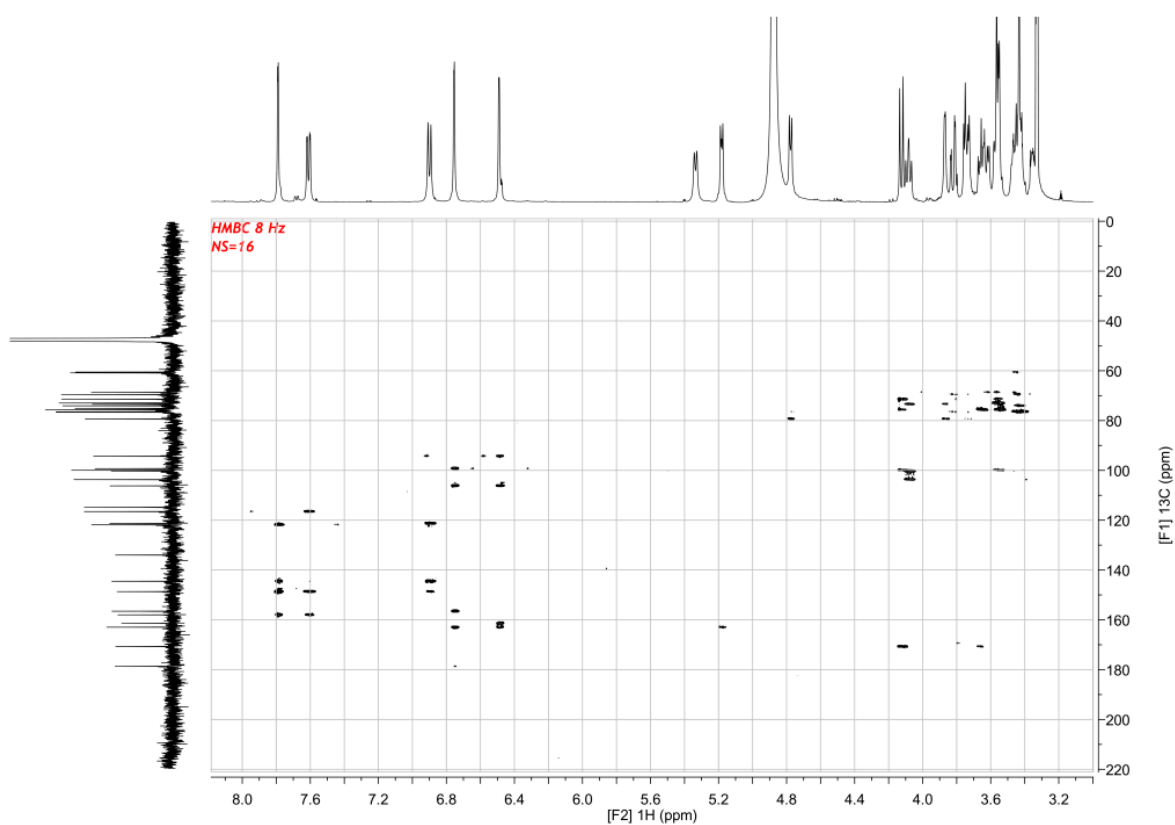

**Figure S9.** 1D TOCSY and 1D ROESY NMR subspectra of H-1(*7-O*- $\beta$ -GlcA) in compound **1** (methanol-*d*<sub>4</sub>, 500.18 MHz).

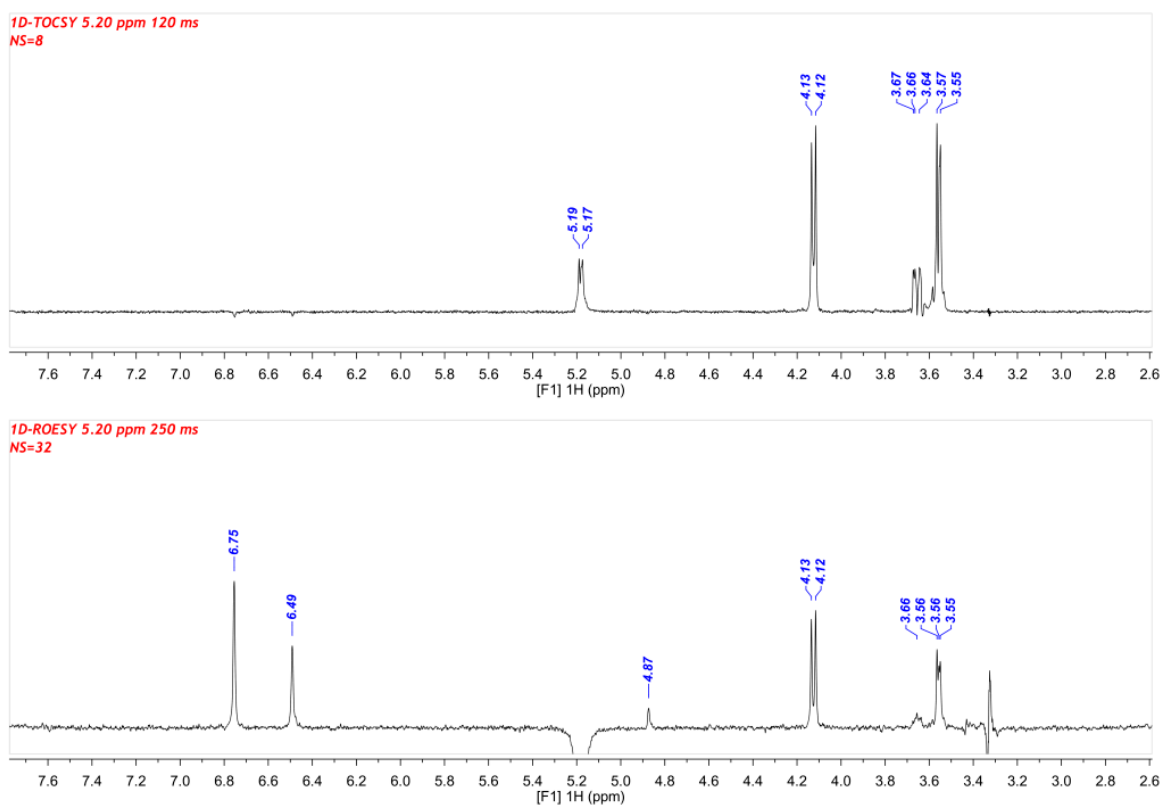

**Figure S10.** 1D TOCSY and 1D ROESY NMR subspectra of H-1(*3-O*- $\beta$ -Gal) in compound **1** (methanol-*d*<sub>4</sub>, 500.18 MHz).

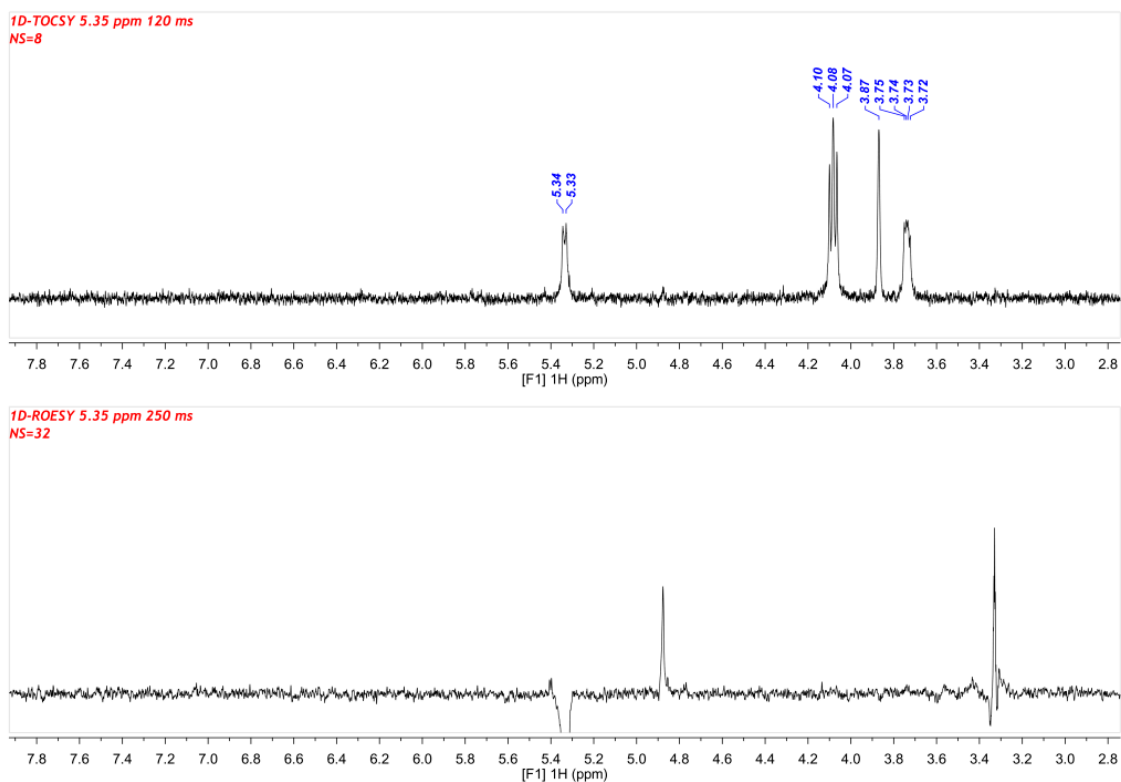

**Figure S11.** 1D TOCSY and 1D ROESY NMR subspectra of H-1(<sub>2</sub><sup>Gal</sup>-O-β-Glc) in compound **1** (methanol-*d*<sub>4</sub>, 500.18 MHz).

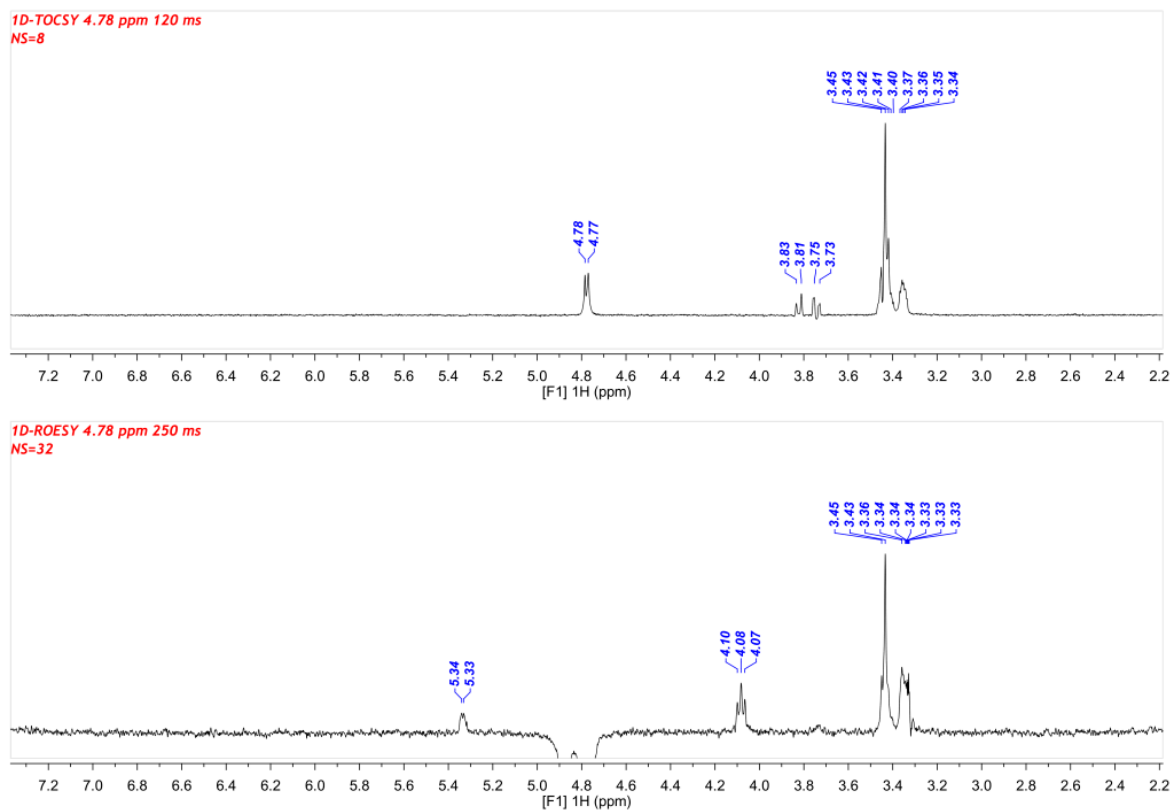

## Compound 2

**Figure S12.** 1D <sup>1</sup>H-NMR spectrum of compound **2** (methanol-*d*<sub>4</sub>, 500.18 MHz).

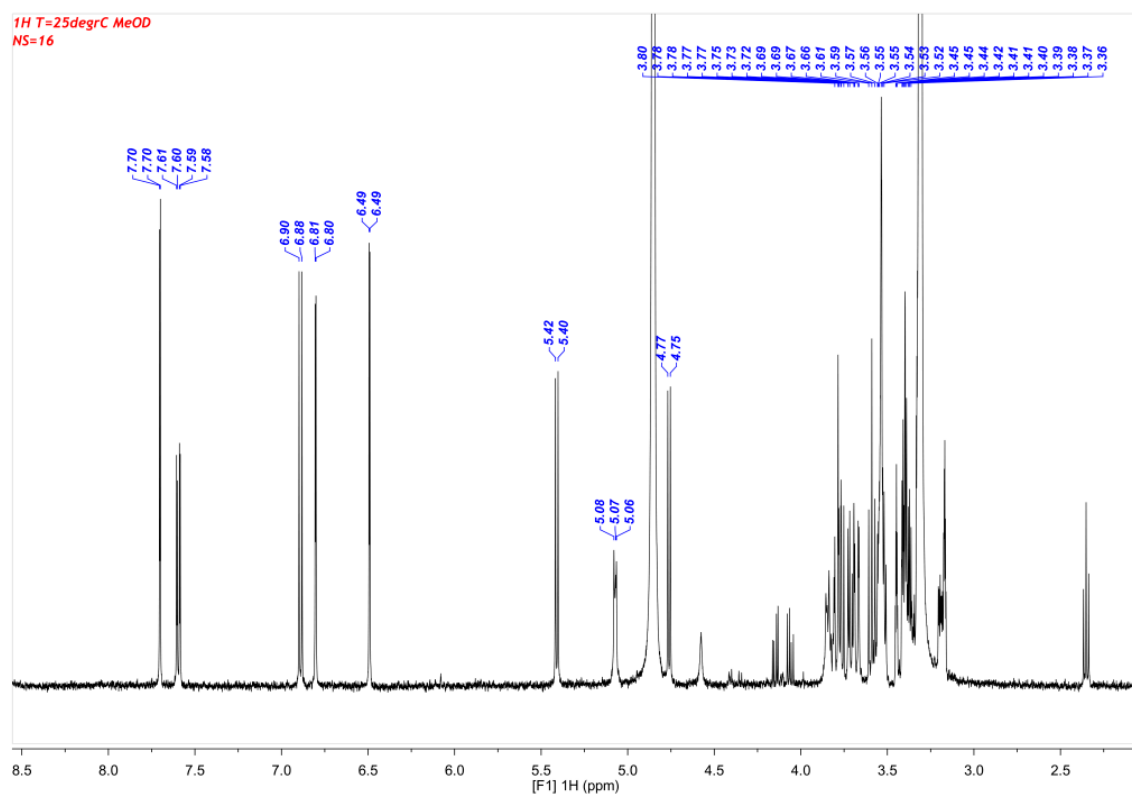

**Figure S13.** 1D  $^{13}\text{C}$ -NMR spectrum ( $^1\text{H}$  decoupled) of compound **2** (methanol- $d_4$ , 125.77 MHz).

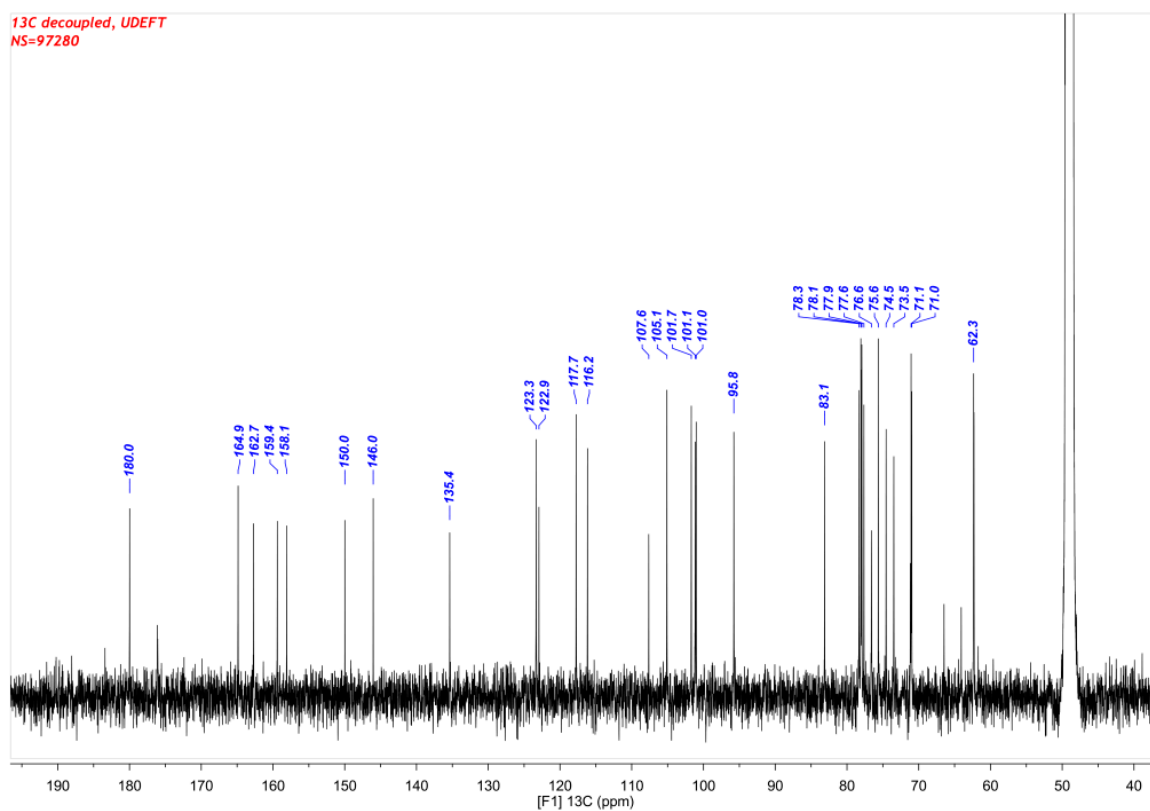

**Figure S14.** 2D g-COSY NMR spectrum of compound **2** (methanol- $d_4$ , 500.18 MHz).

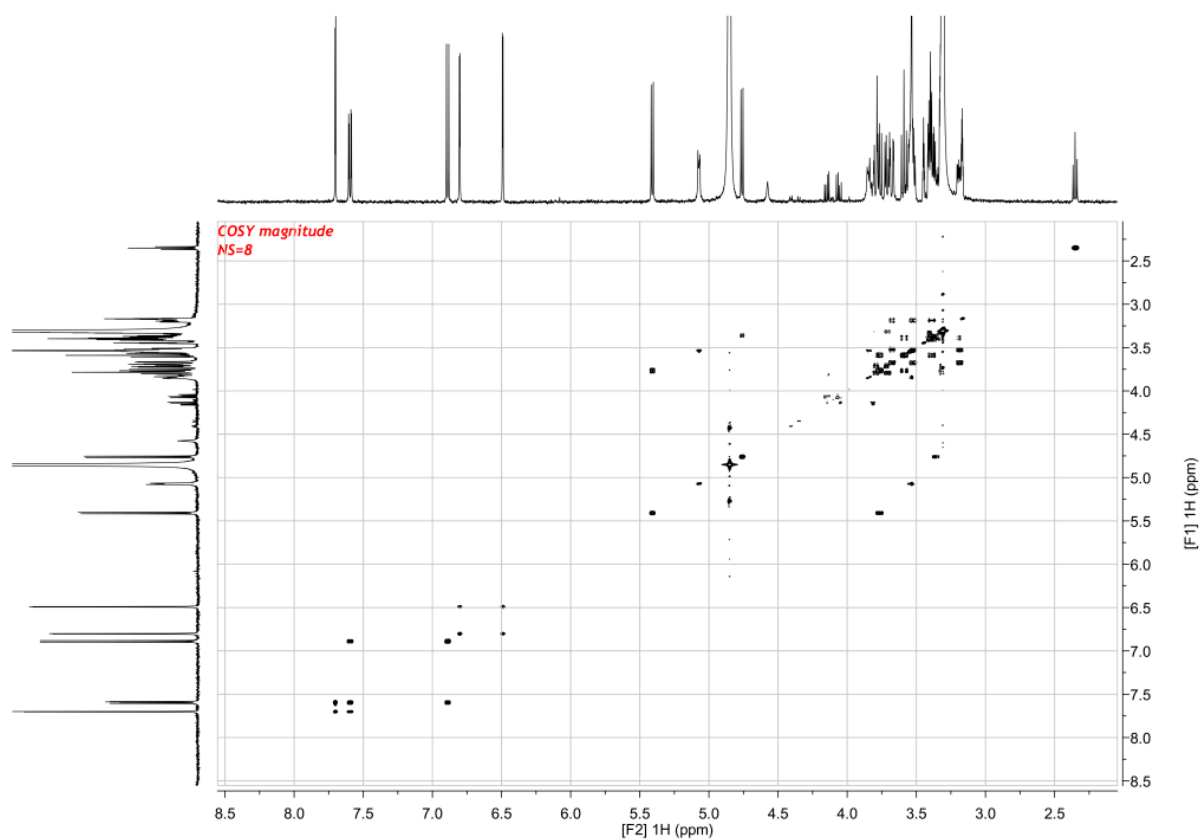

**Figure S15.** 2D TOCSY NMR spectrum of compound **2** (methanol- $d_4$ , 500.18 MHz).

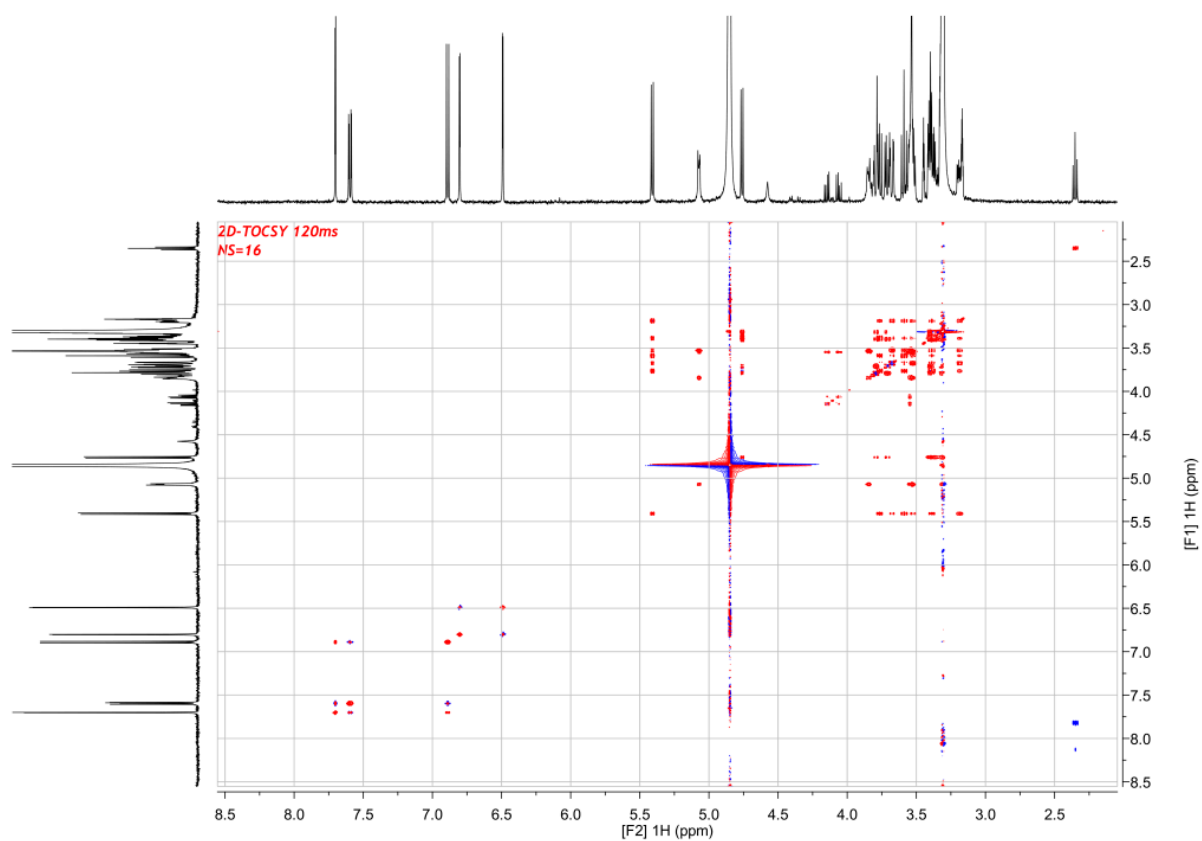

**Figure S16.** 2D ROESY NMR spectrum of compound **2** (methanol- $d_4$ , 500.18 MHz).

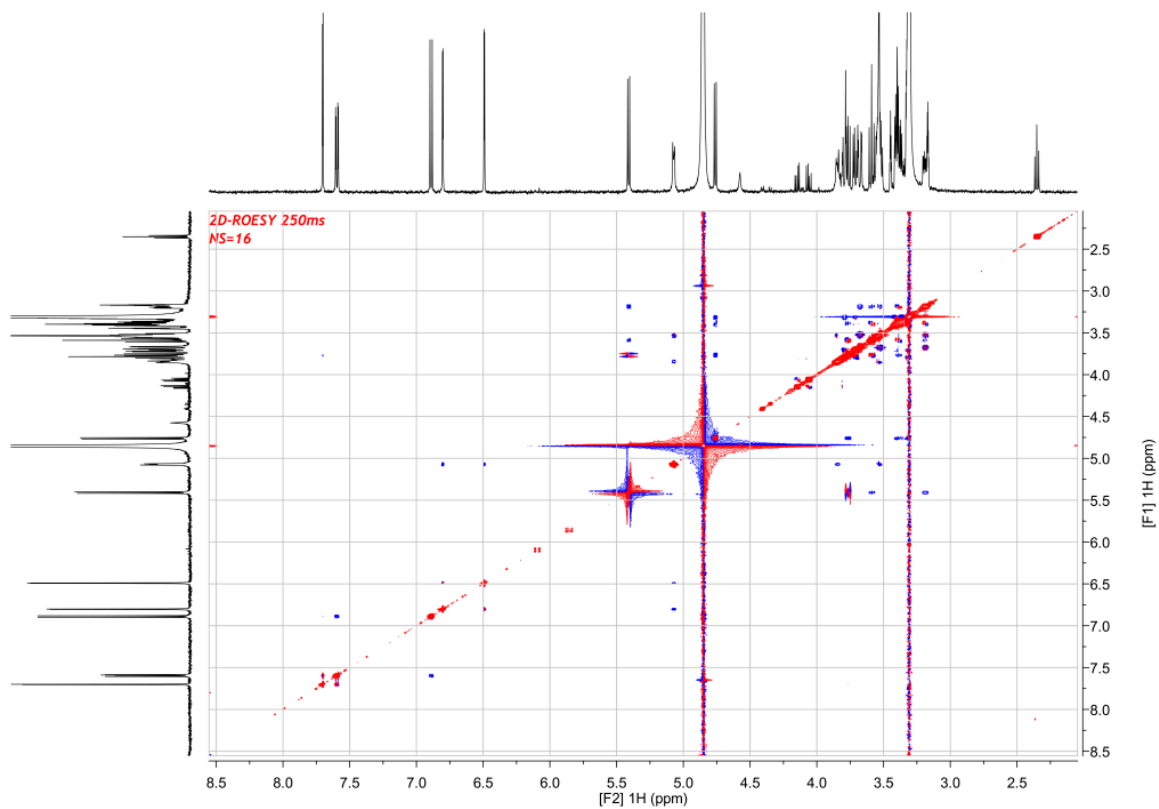

**Figure S17.** 2D *g*-HSQC-NMR spectrum of compound **2** (methanol-*d*<sub>4</sub>, 500.18 MHz, 125.77 MHz).

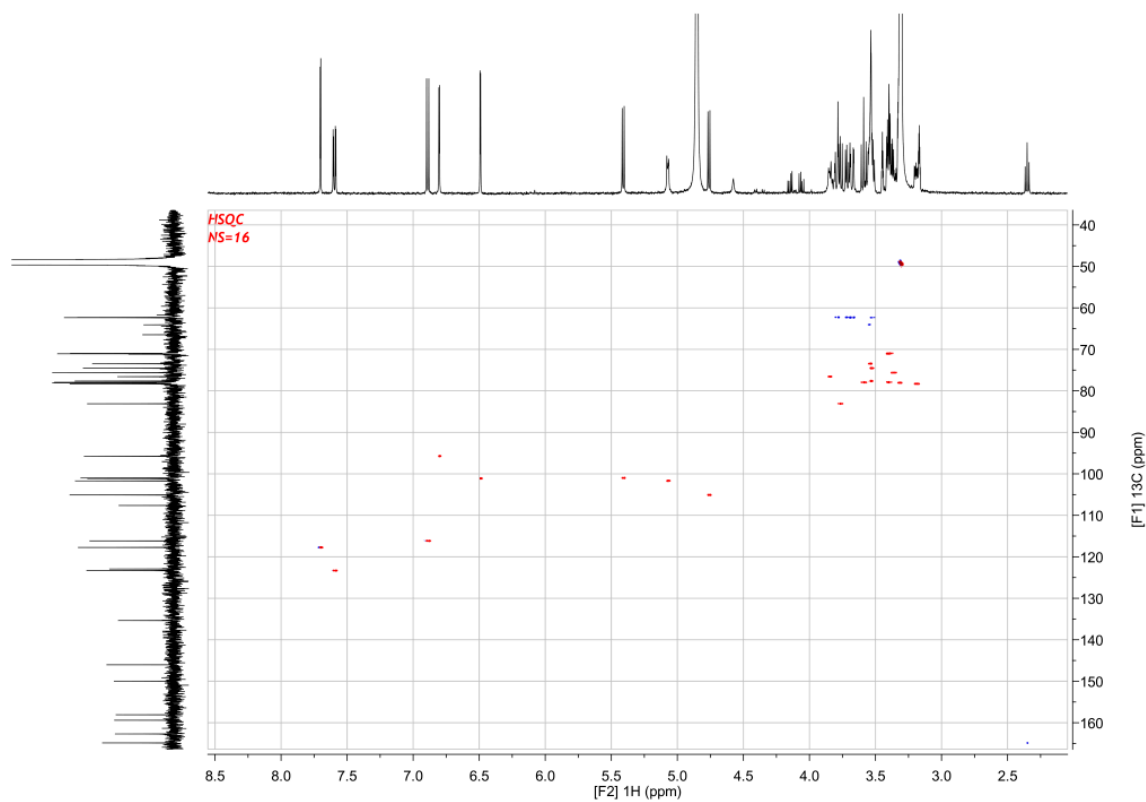

**Figure S18.** 2D *g*-HSQC-TOCSY NMR spectrum of compound **2** (methanol-*d*<sub>4</sub>, 500.18 MHz, 125.77 MHz).

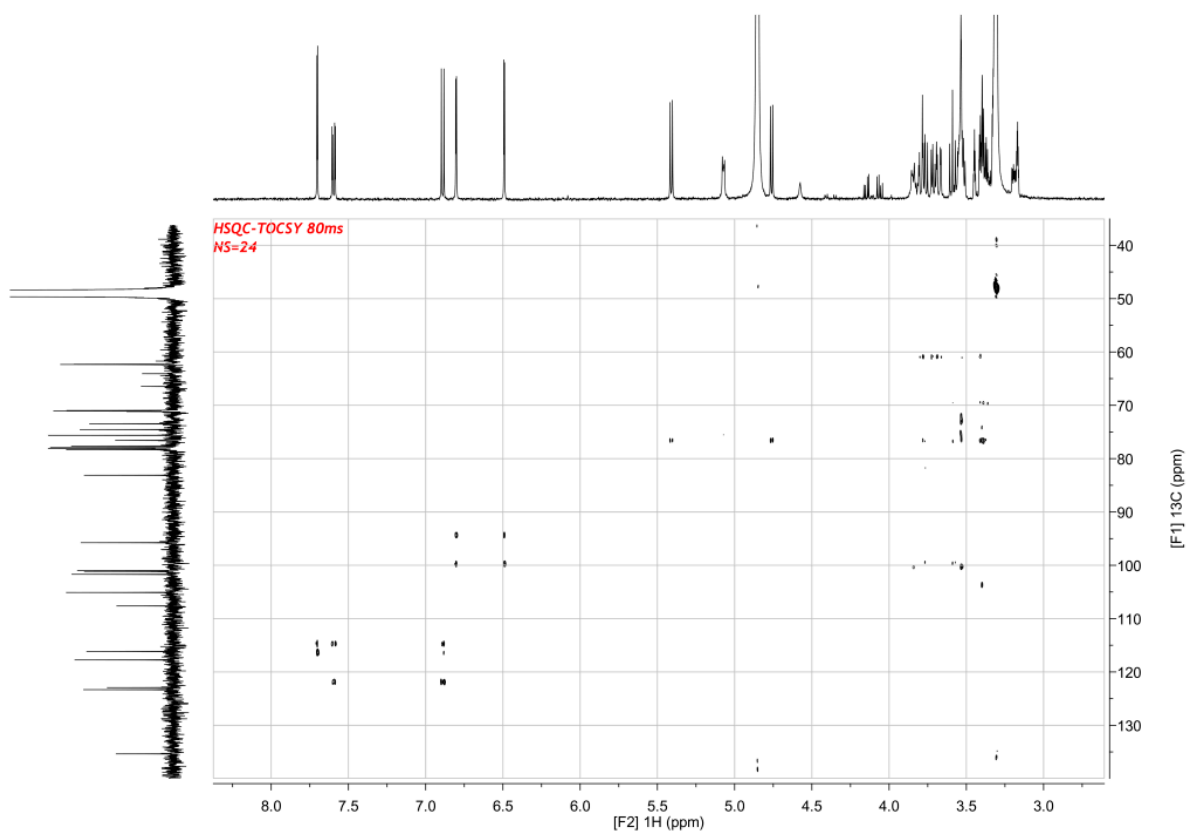

**Figure S19.** 2D g-HMBC-NMR spectrum of compound **2** (methanol- $d_4$ , 500.18 MHz, 125.77 MHz).

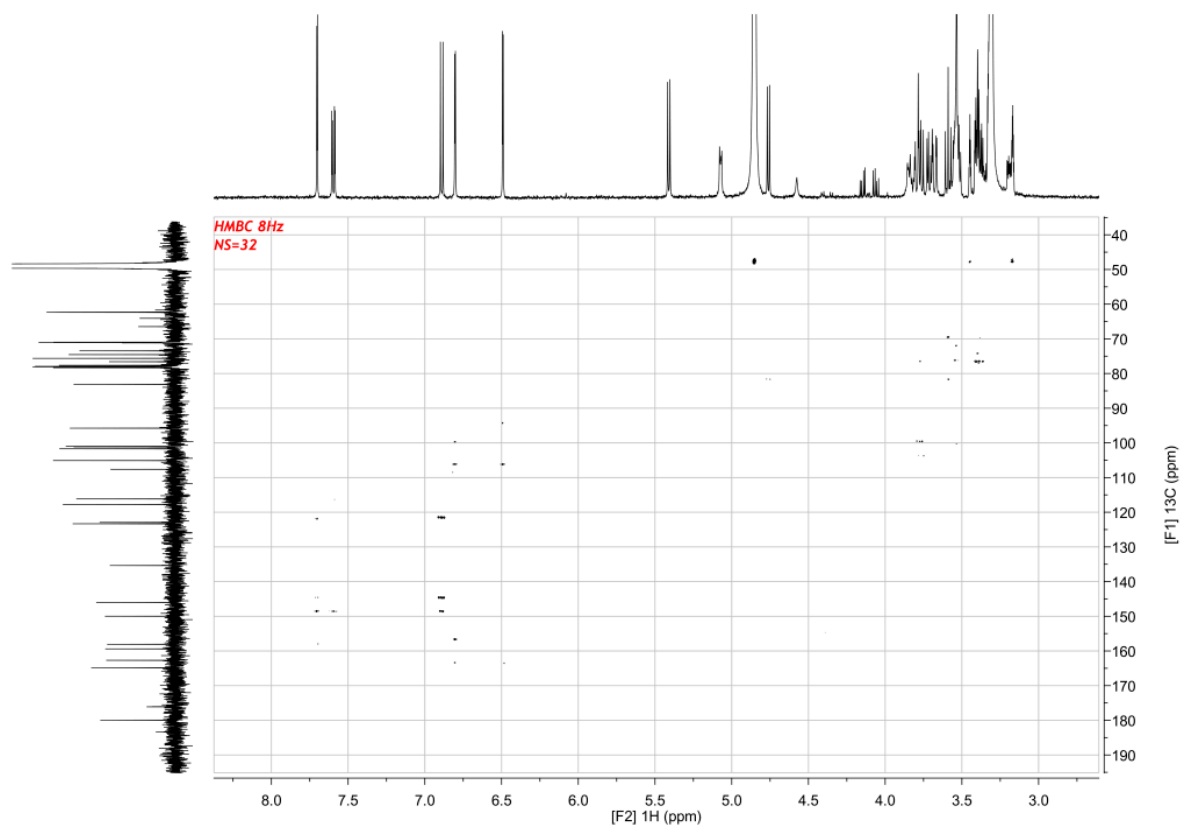

**Figure S20.** 1D TOCSY and 1D ROESY NMR subspectra of H-1( $7-O-\beta$ -GlcA) in compound **2** (methanol- $d_4$ , 500.18 MHz).

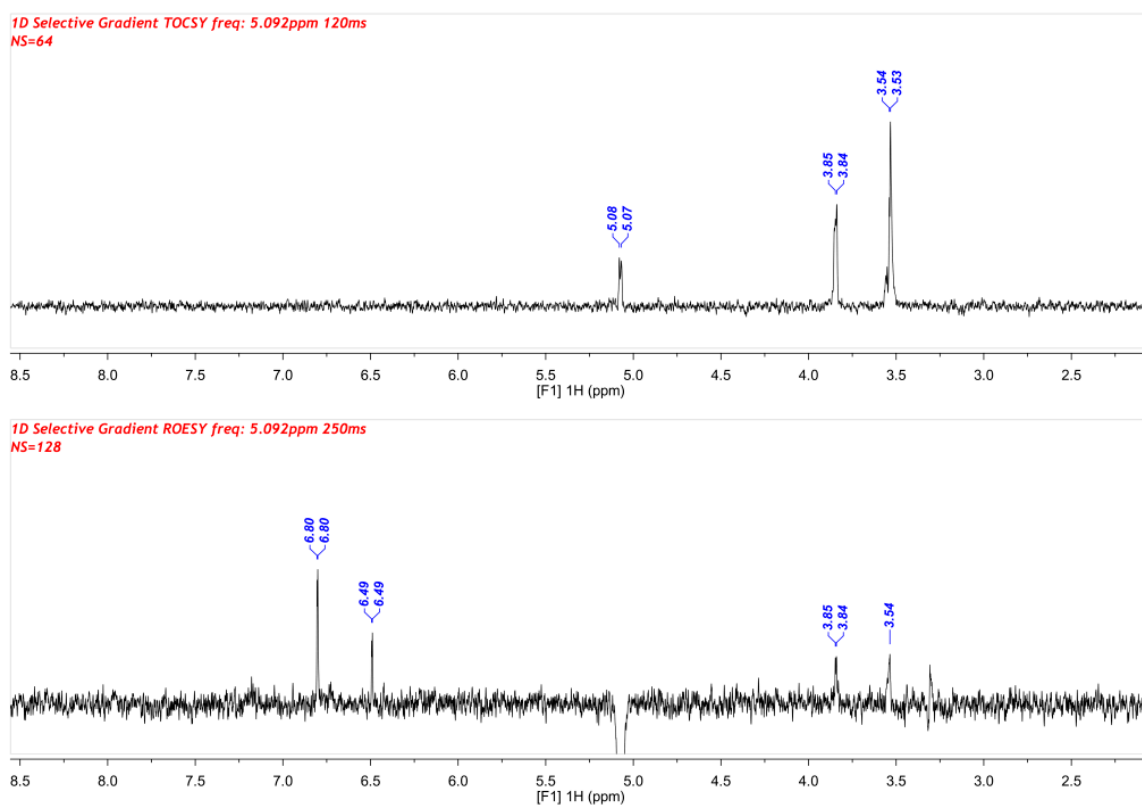



**Figure S21.** 1D TOCSY and 1D ROESY NMR subspectra of H-1(<sub>3</sub>-O-β-Glc) in compound **2** (methanol-*d*<sub>4</sub>, 500.18 MHz).

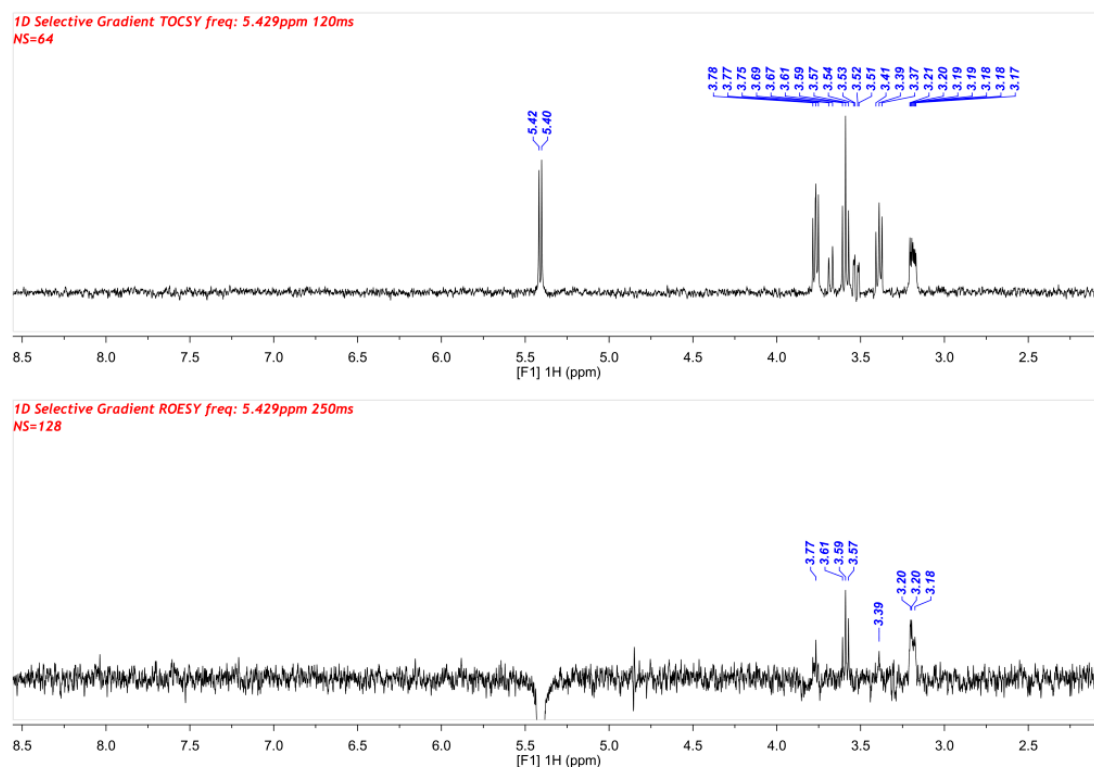

**Figure S22.** 1D TOCSY and 1D ROESY NMR subspectra of H-1(<sub>2</sub><sup>Glc</sup>-O-β-Glc) in compound **2** (methanol-*d*<sub>4</sub>, 500.18 MHz).

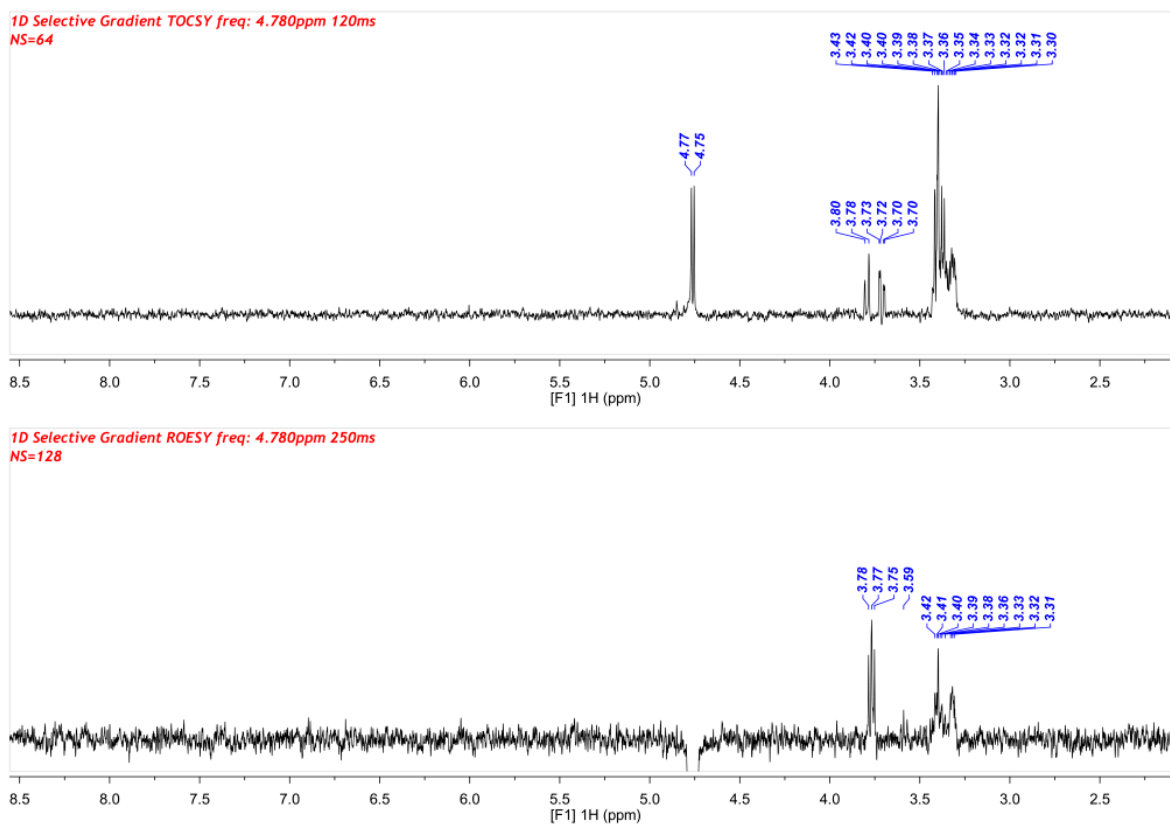

## Compound 3

Figure S23. 1D  $^1\text{H}$ -NMR spectrum of compound 3 (methanol- $d_4$ , 500.18 MHz).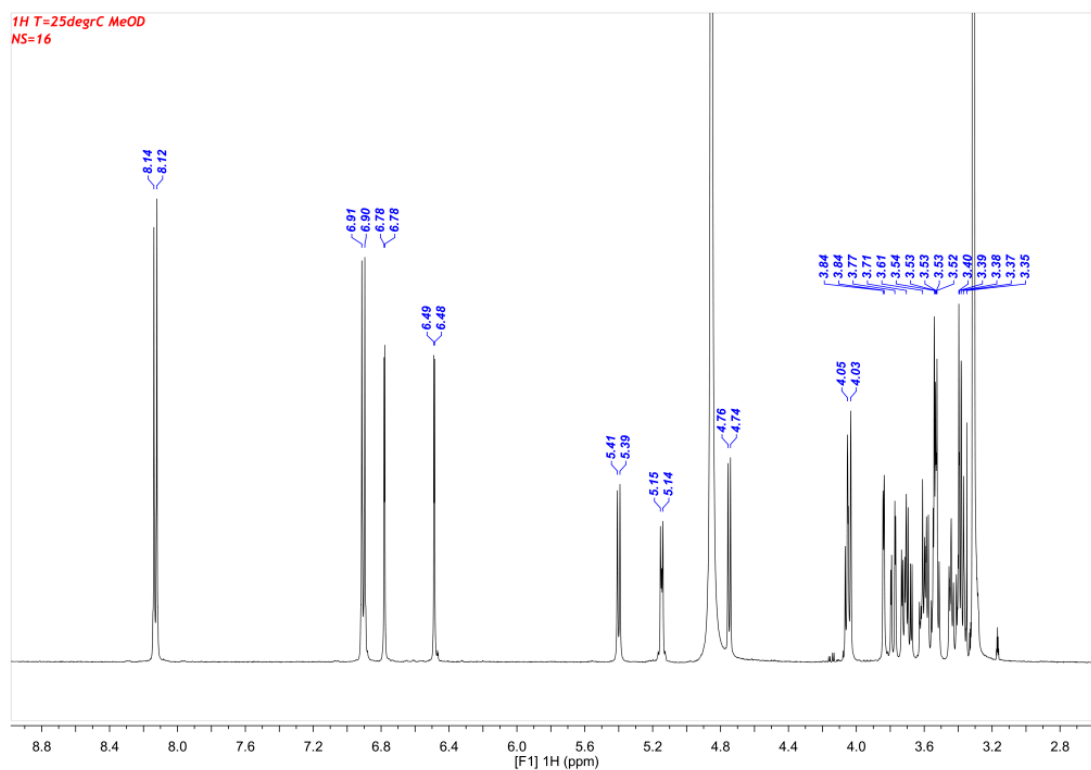Figure S24. 1D  $^{13}\text{C}$ -NMR spectra ( $^1\text{H}$  decoupled and DEPT-135) of compound 3 (methanol- $d_4$ , 125.77 MHz).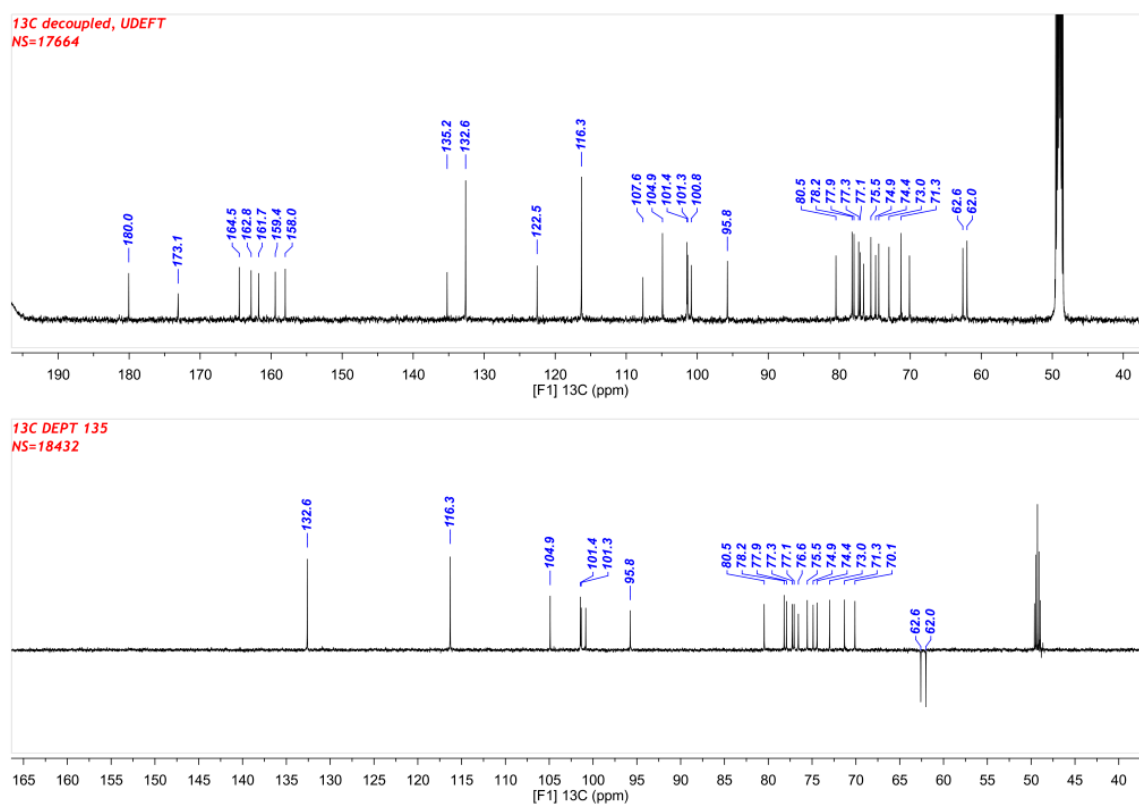

**Figure S25.** 2D g-COSY NMR spectrum of compound **3** (methanol- $d_4$ , 500.18 MHz).

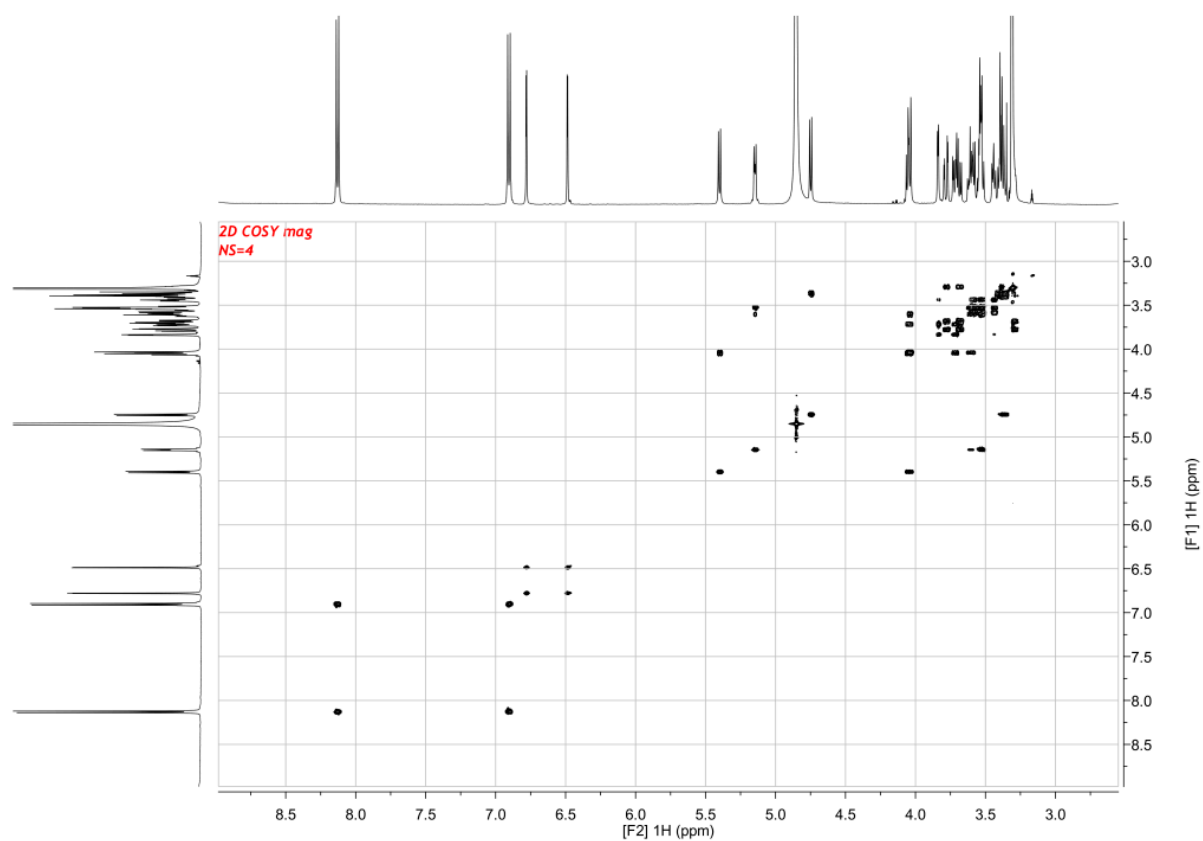

**Figure S26.** 2D TOCSY NMR spectrum of compound **3** (methanol- $d_4$ , 500.18 MHz).

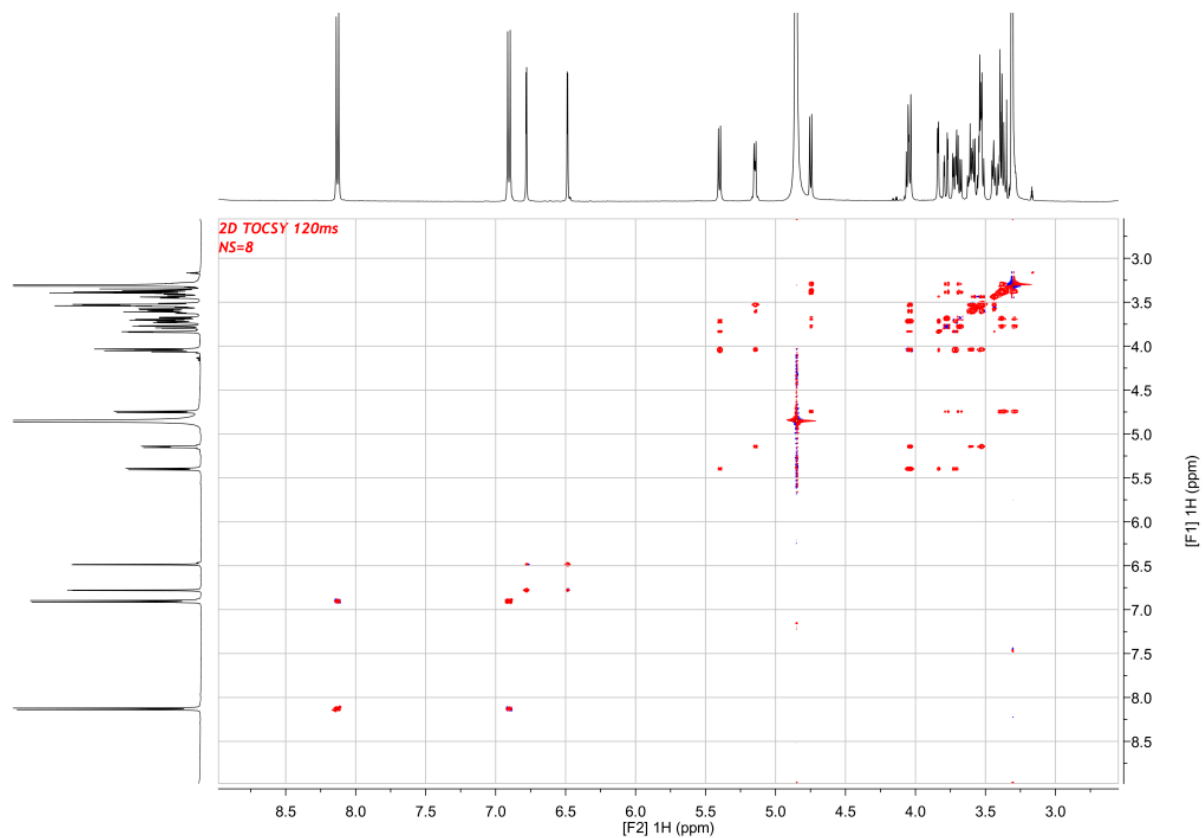

**Figure S27.** 2D ROESY NMR spectrum of compound **3** (methanol- $d_4$ , 500.18 MHz).

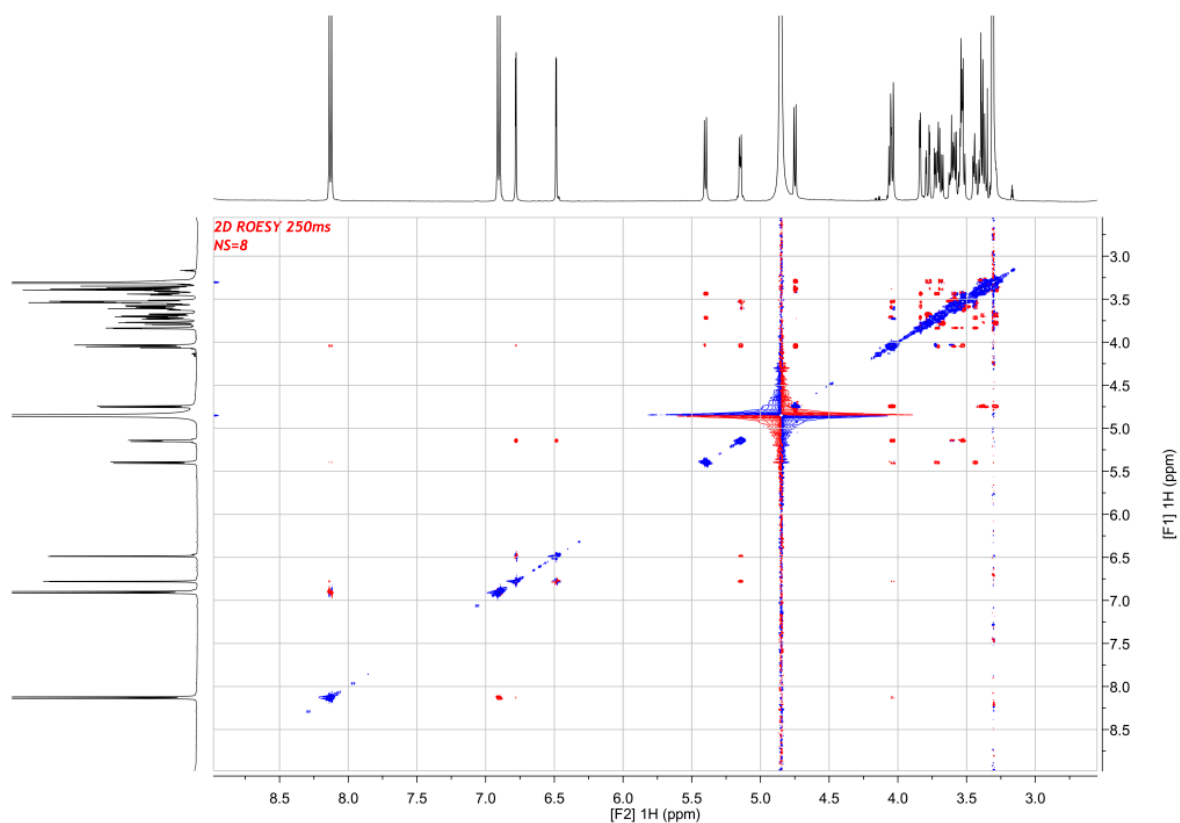

**Figure S28.** 2D  $g$ -HSQC-NMR spectrum of compound **3** (methanol- $d_4$ , 500.18 MHz, 125.77 MHz).

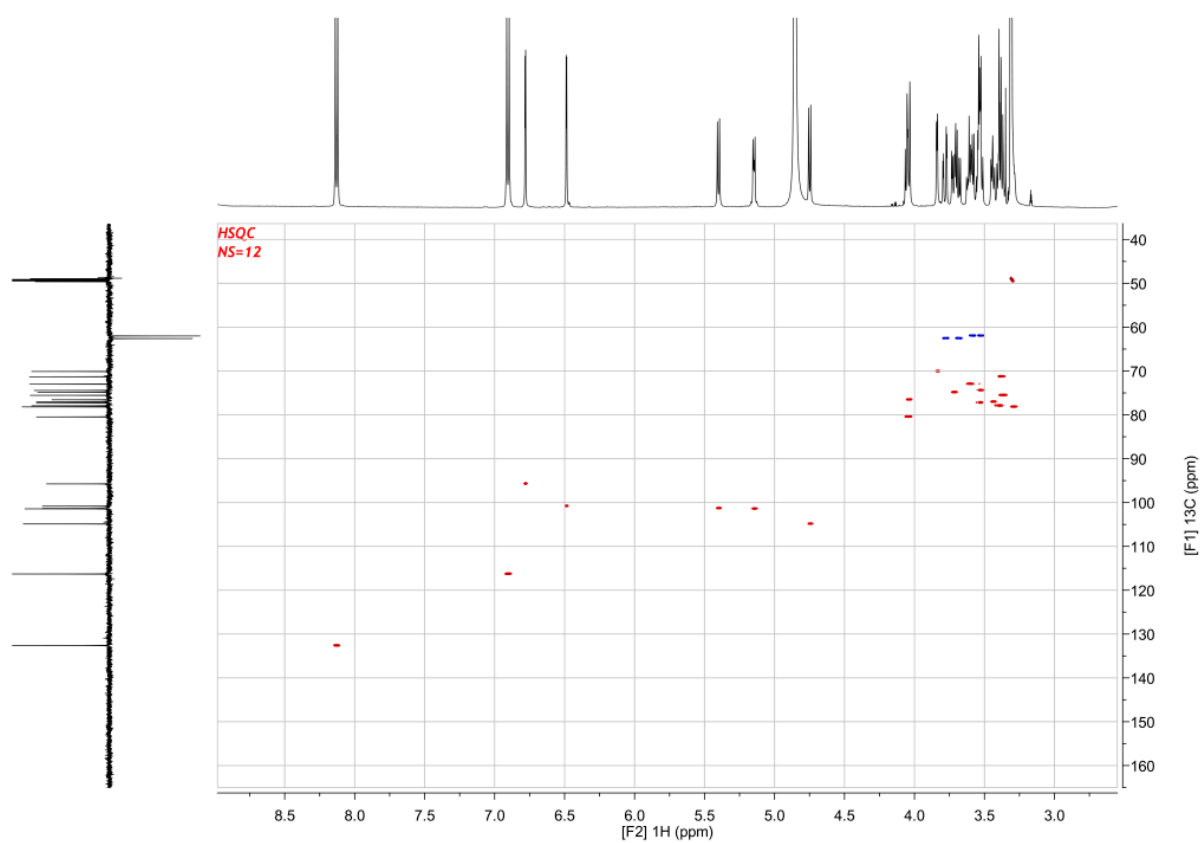

**Figure S29.** 2D g-HSQC-TOCSY NMR spectrum of compound **3** (methanol- $d_4$ , 500.18 MHz, 125.77 MHz).

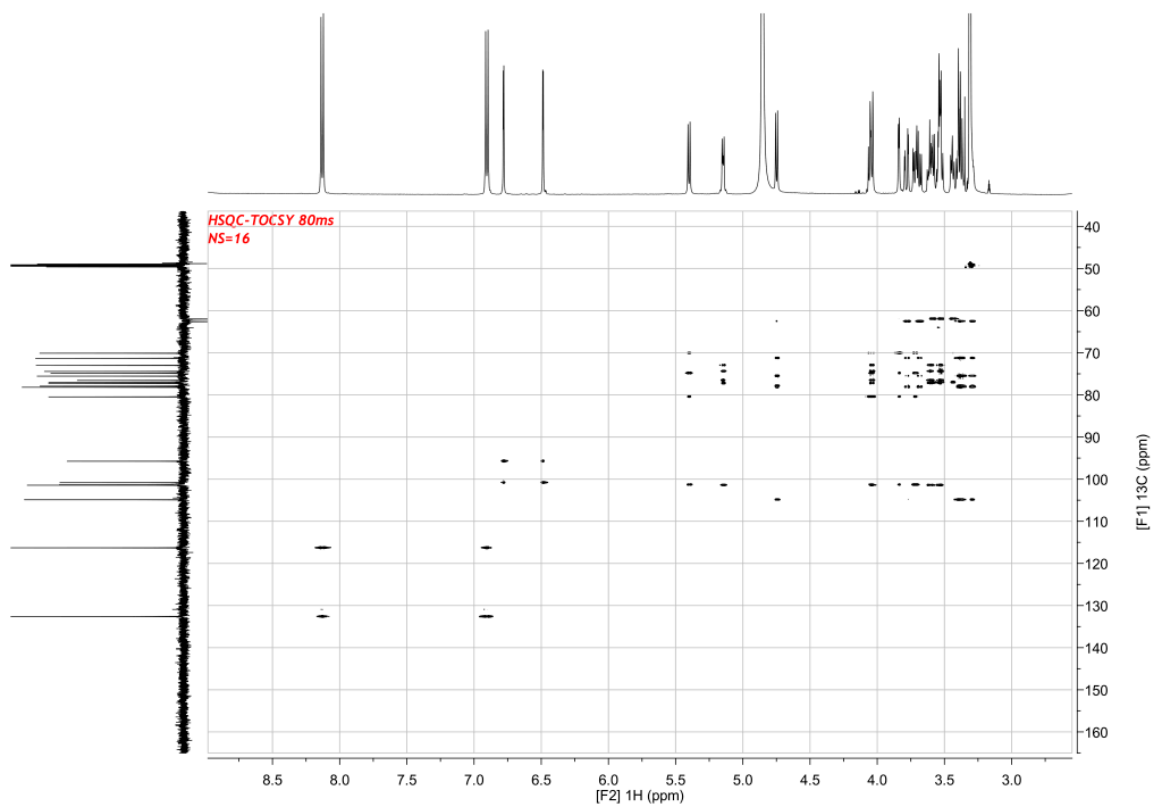

**Figure S30.** 2D g-HMBC-NMR spectrum of compound **3** (methanol- $d_4$ , 500.18 MHz, 125.77 MHz).

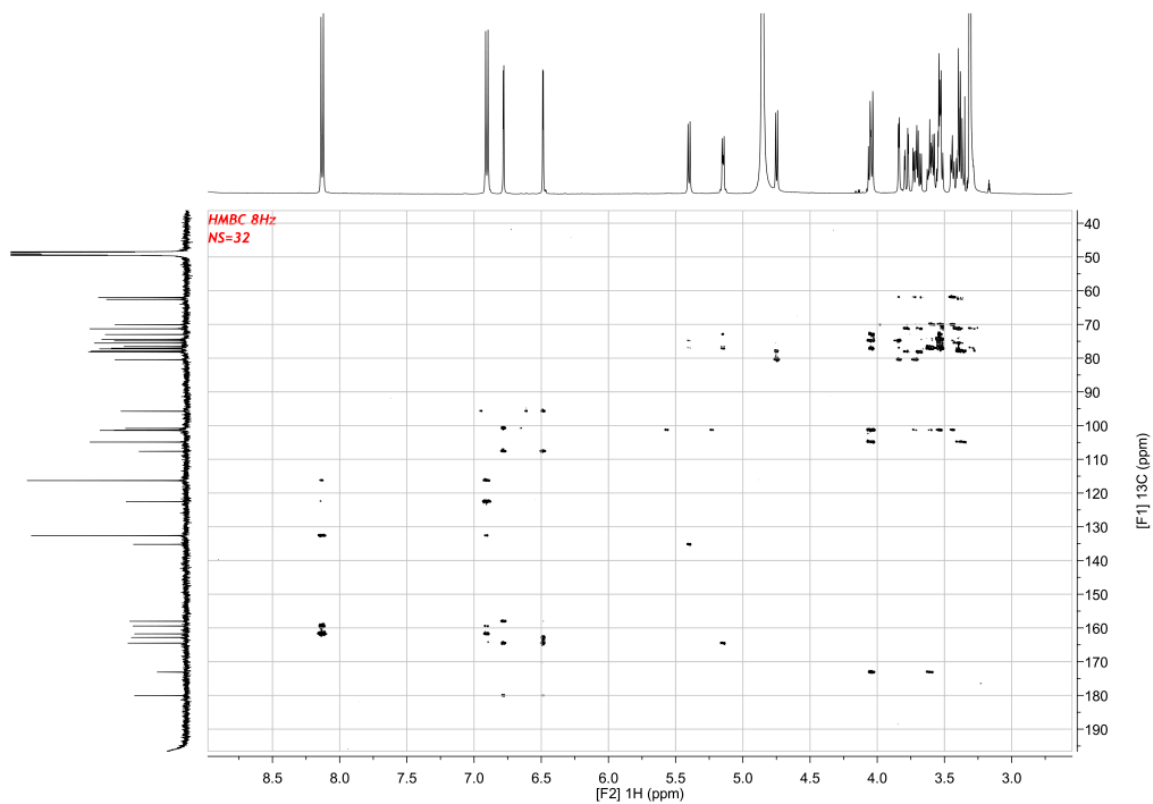

**Figure S31.** 1D TOCSY and 1D ROESY NMR subspectra of H-1(*7-O*- $\beta$ -GlcA) in compound **3** (methanol-*d*<sub>4</sub>, 500.18 MHz).

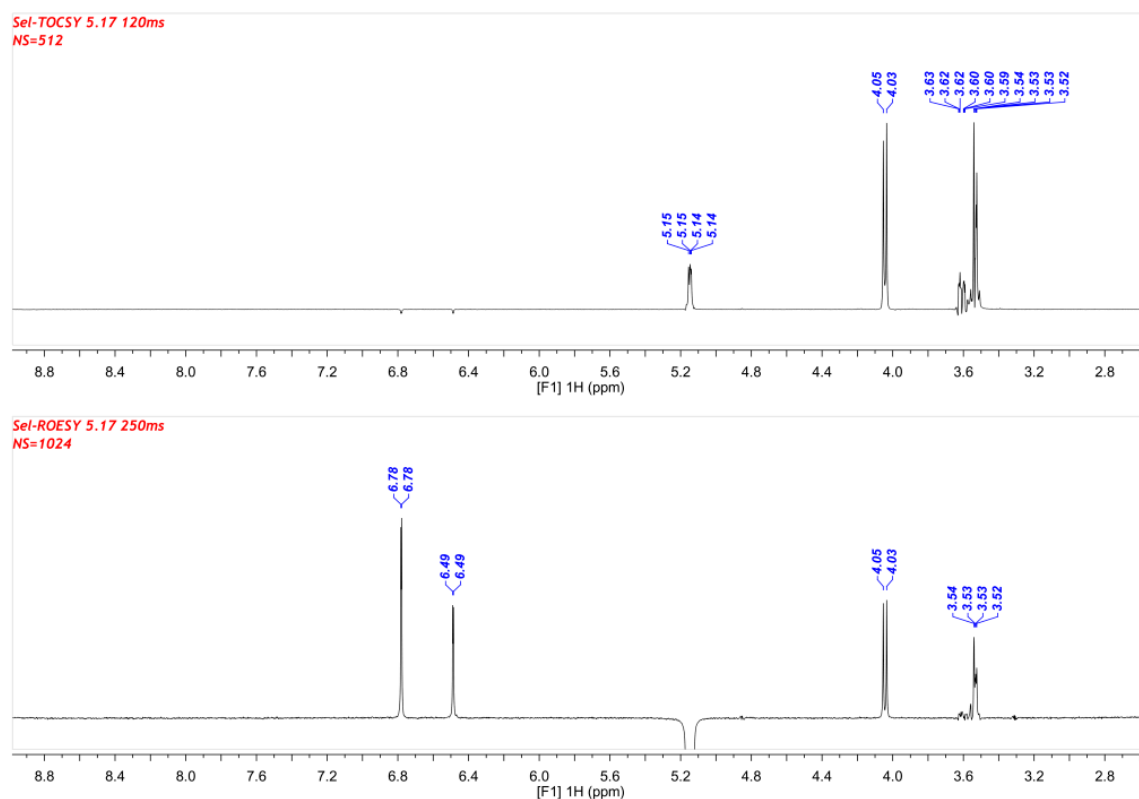

**Figure S32.** 1D TOCSY and 1D ROESY NMR subspectra of H-1(*3-O*- $\beta$ -Gal) in compound **3** (methanol-*d*<sub>4</sub>, 500.18 MHz).

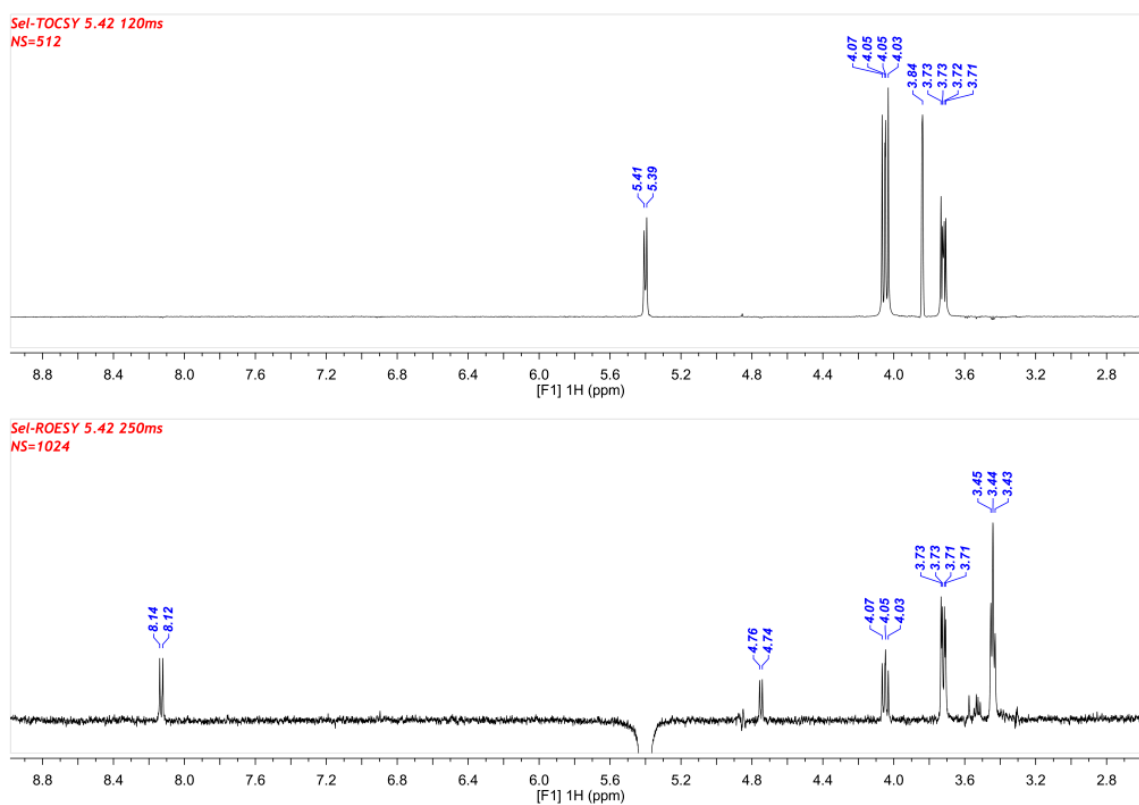

**Figure S33.** 1D TOCSY and 1D ROESY NMR subspectra of H-1(<sub>2</sub>Gal-*O*-β-Glc) in compound **3** (methanol-*d*<sub>4</sub>, 500.18 MHz).

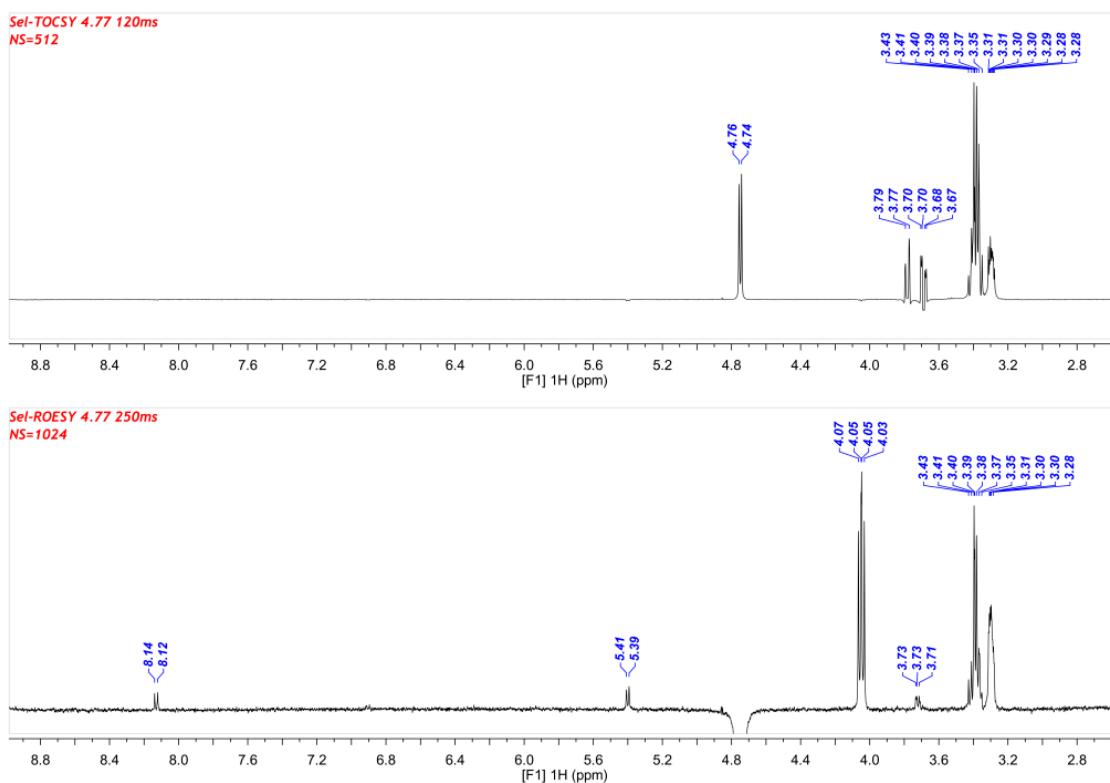

## Compound 4

**Figure S34.** 1D <sup>1</sup>H-NMR spectrum of compound **4** (methanol-*d*<sub>4</sub>, 500.18 MHz).

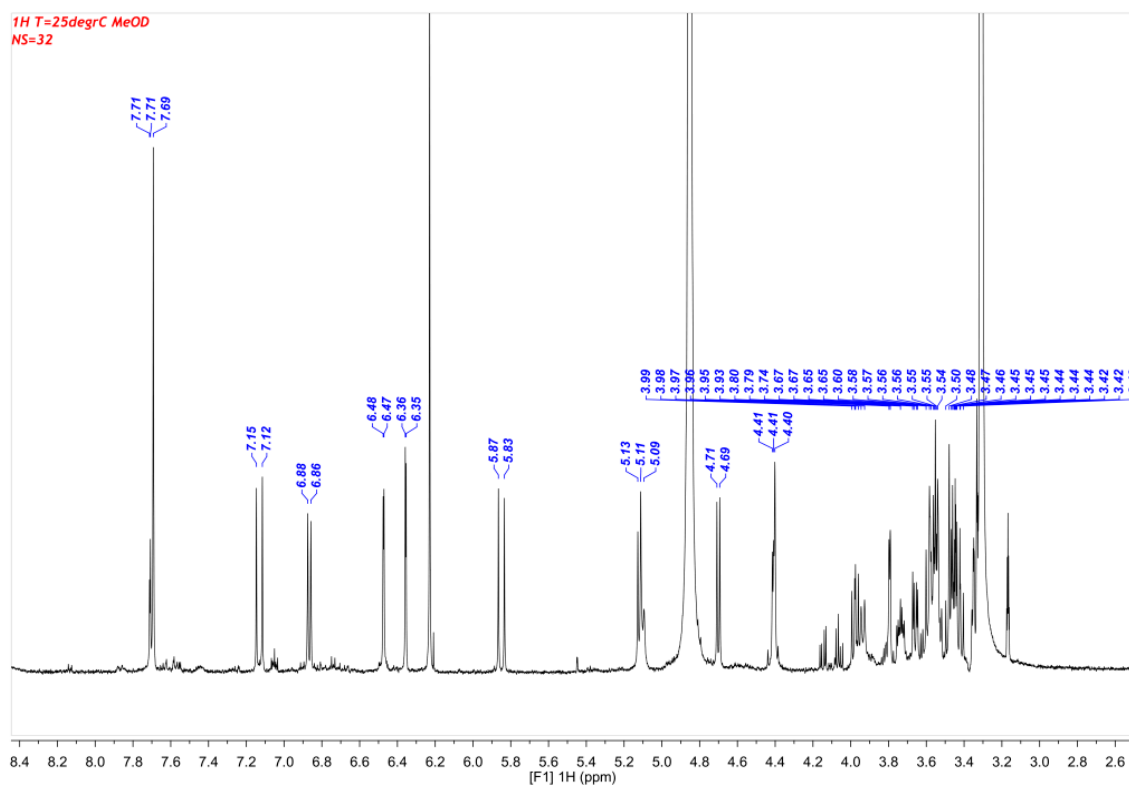

**Figure S35.** 1D  $^{13}\text{C}$ -NMR spectra (1H decoupled and DEPT-135) of compound **4** (methanol- $d_4$ , 125.77 MHz).

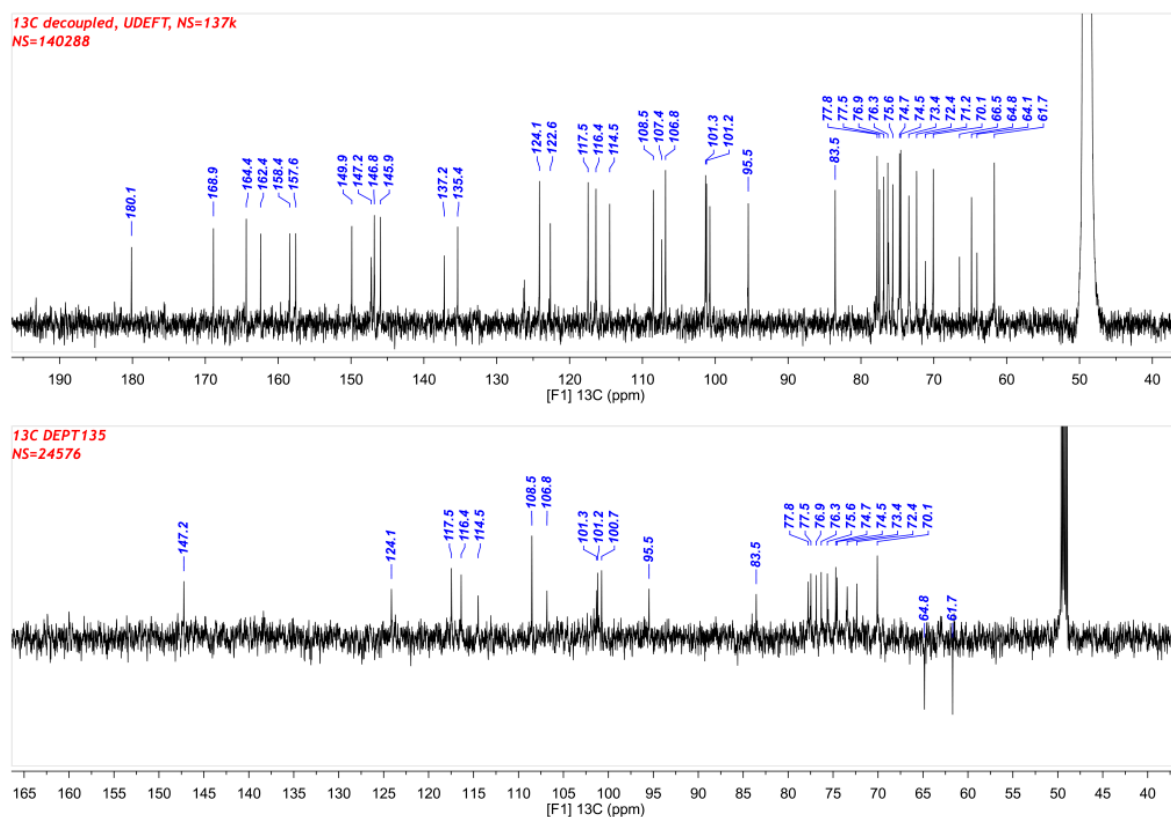

**Figure S36.** 2D g-COSY NMR spectrum of compound **4** (methanol- $d_4$ , 500.18 MHz).

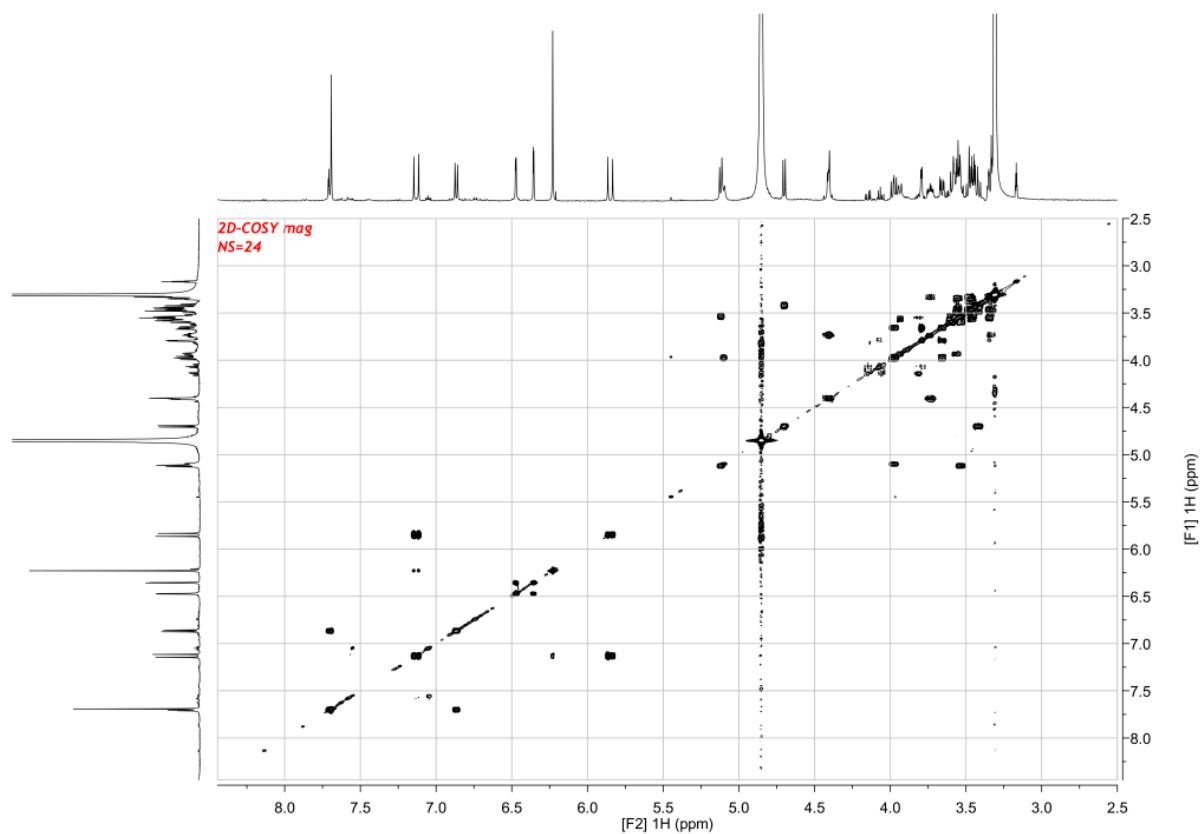



**Figure S37.** 2D TOCSY NMR spectrum of compound **4** (methanol- $d_4$ , 500.18 MHz).

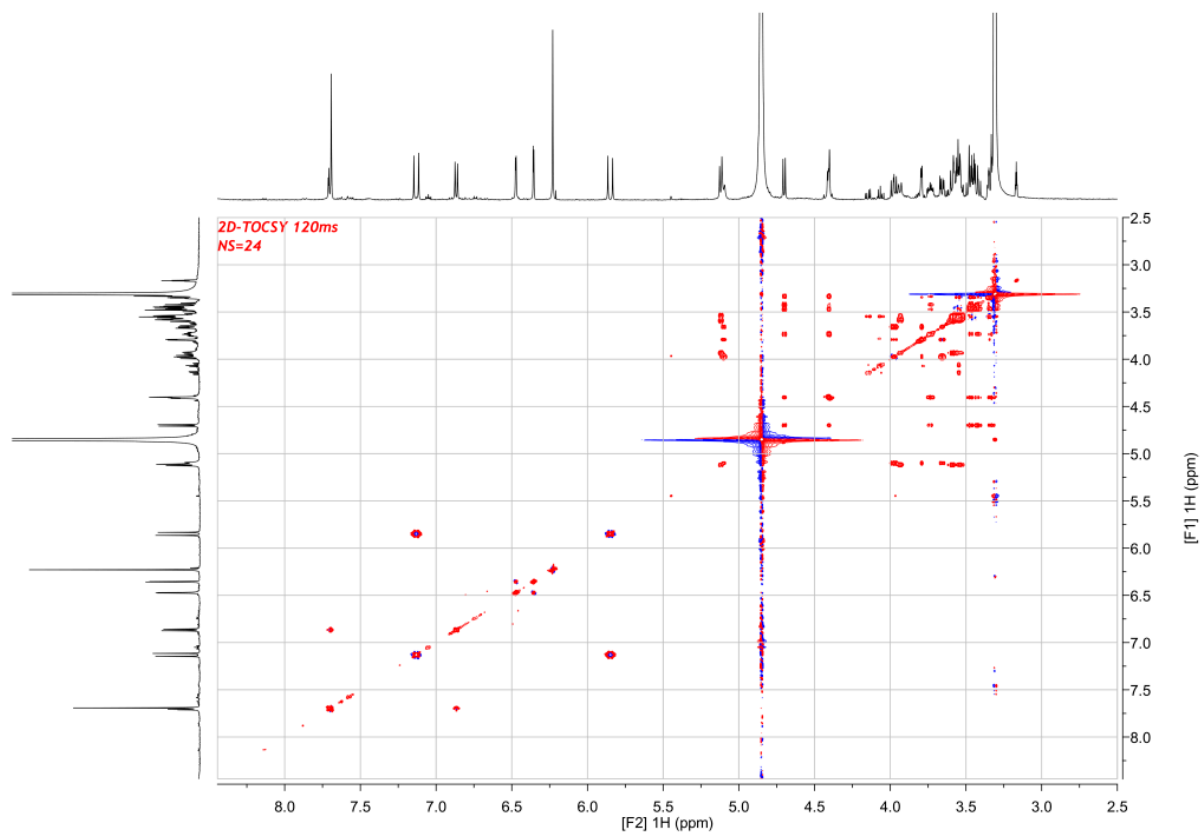

**Figure S38.** 2D ROESY NMR spectrum of compound **4** (methanol- $d_4$ , 500.18 MHz).

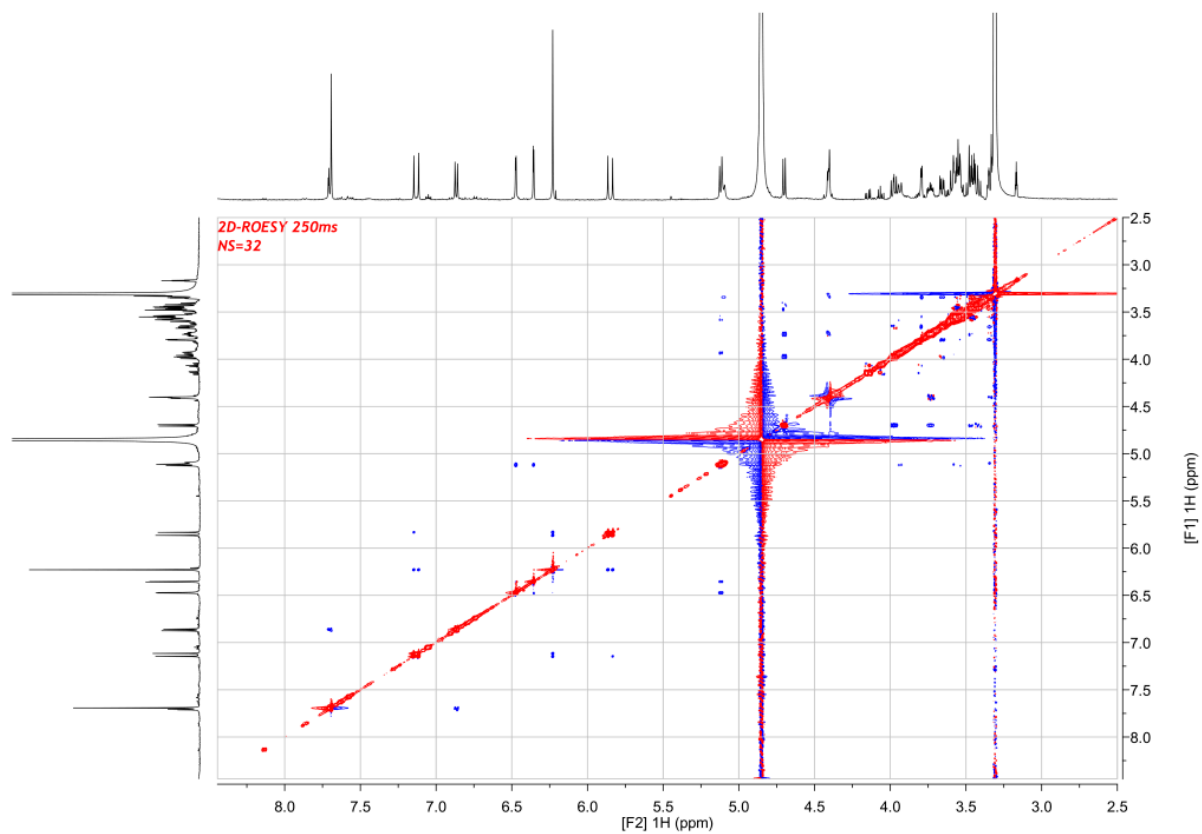

**Figure S39.** 2D *g*-HSQC-NMR spectrum of compound **4** (methanol-*d*<sub>4</sub>, 500.18 MHz, 125.77 MHz).

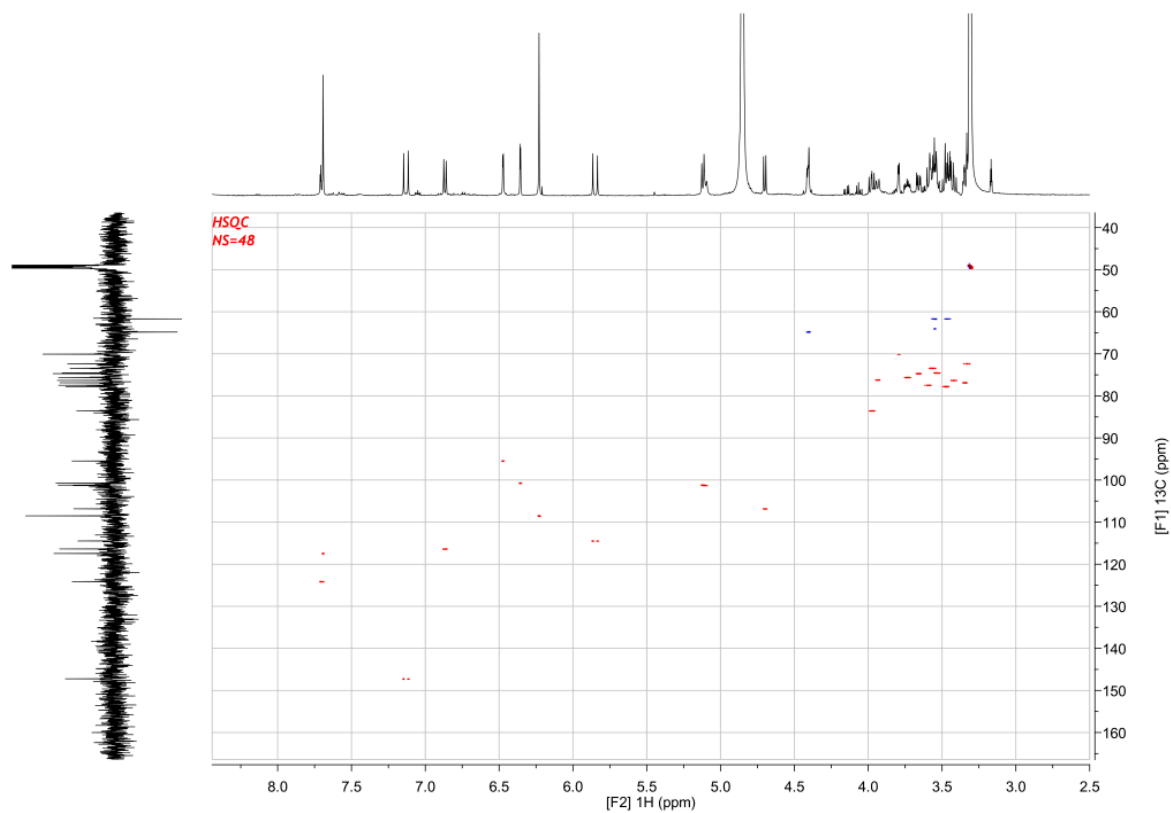

**Figure S40.** 2D *g*-HSQC-TOCSY NMR spectrum of compound **4** (methanol-*d*<sub>4</sub>, 500.18 MHz, 125.77 MHz).

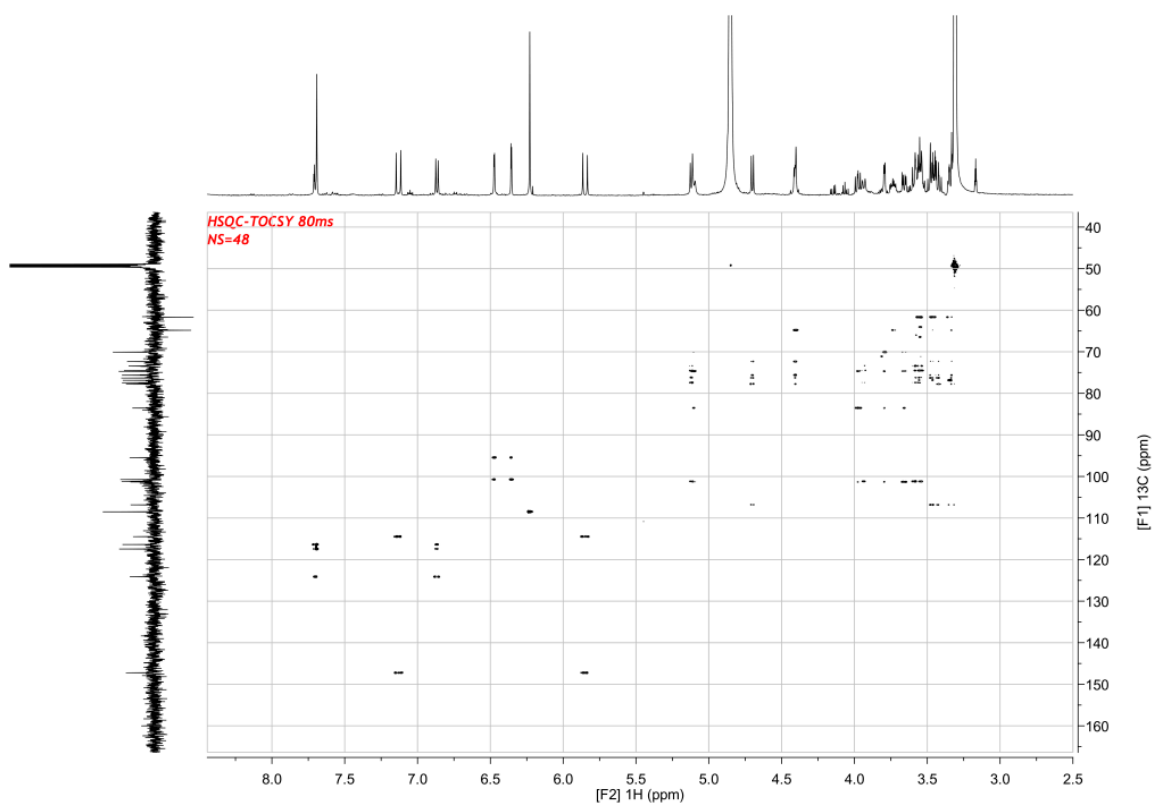

**Figure S41.** 2D g-HMBC-NMR spectrum of compound **4** (methanol- $d_4$ , 500.18 MHz, 125.77 MHz).

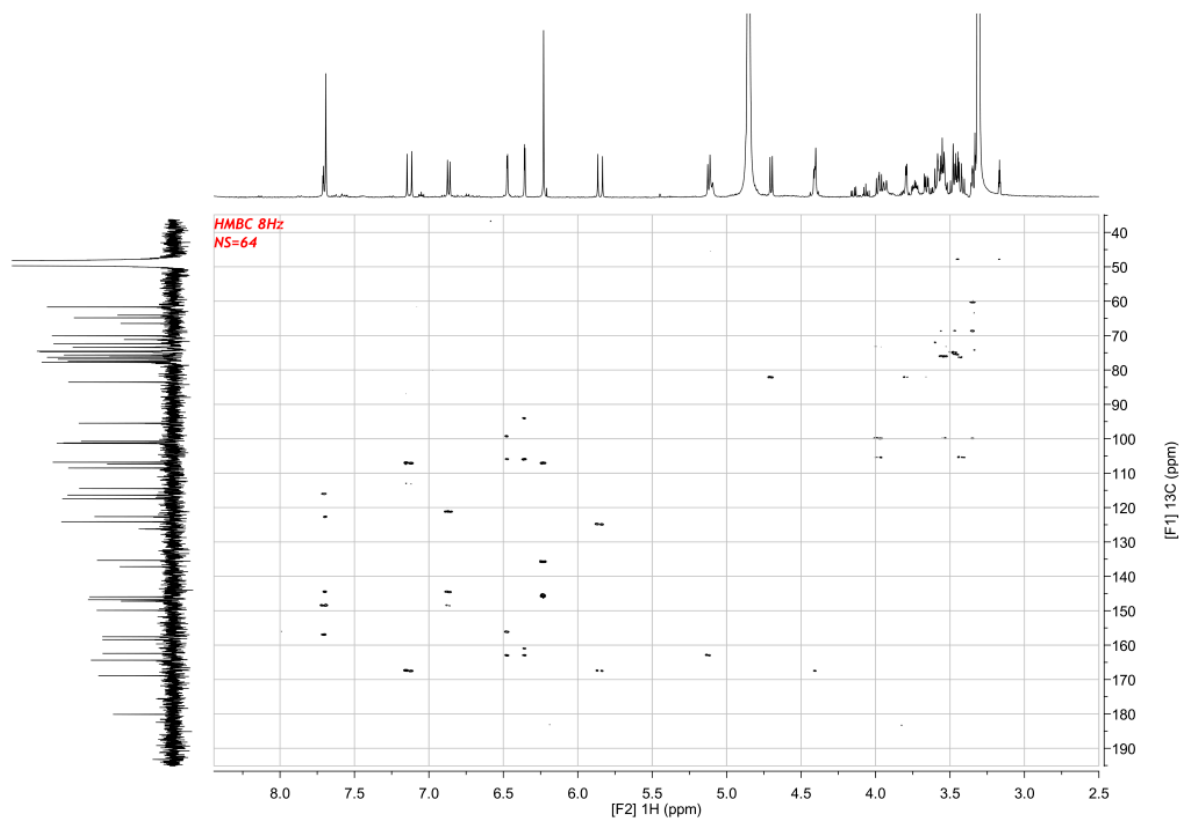

**Figure S42.** 1D TOCSY and 1D ROESY NMR subspectra of H-1(7-*O*- $\beta$ -GlcA) and H-1(3-*O*- $\beta$ -Gal) in compound **4** (methanol- $d_4$ , 500.18 MHz).

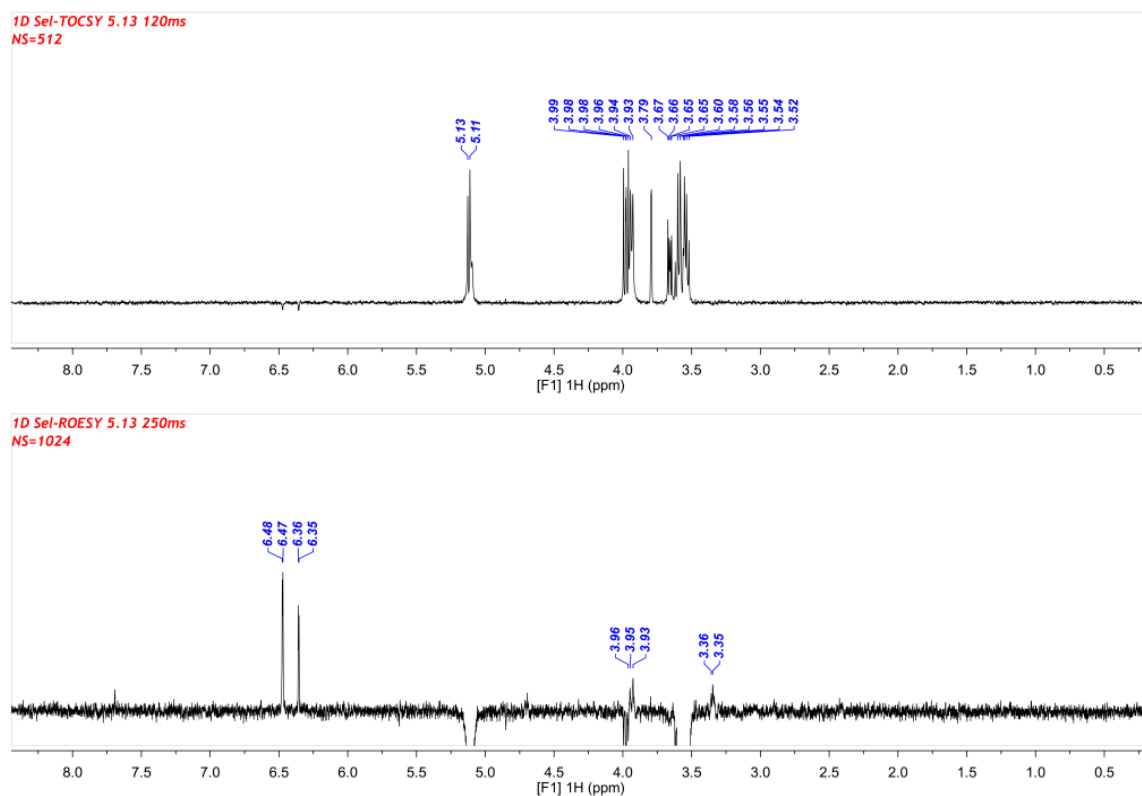

**Figure S43.** 1D TOCSY and 1D ROESY NMR subspectra of H-1(<sub>2</sub><sup>Gal</sup>-O-β-Glc) in compound **4** (methanol-*d*<sub>4</sub>, 500.18 MHz).

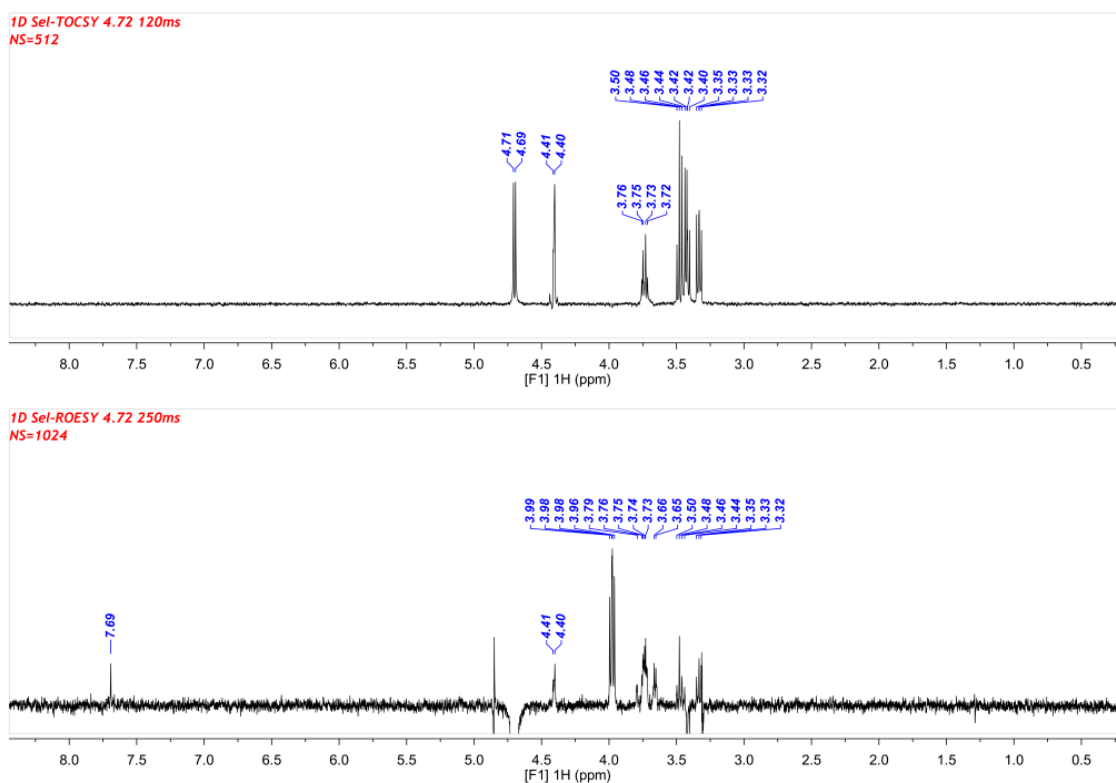

## Compound **5**

**Figure S44.** 1D <sup>1</sup>H-NMR spectrum of compound **5** (methanol-*d*<sub>4</sub>, 500.18 MHz).

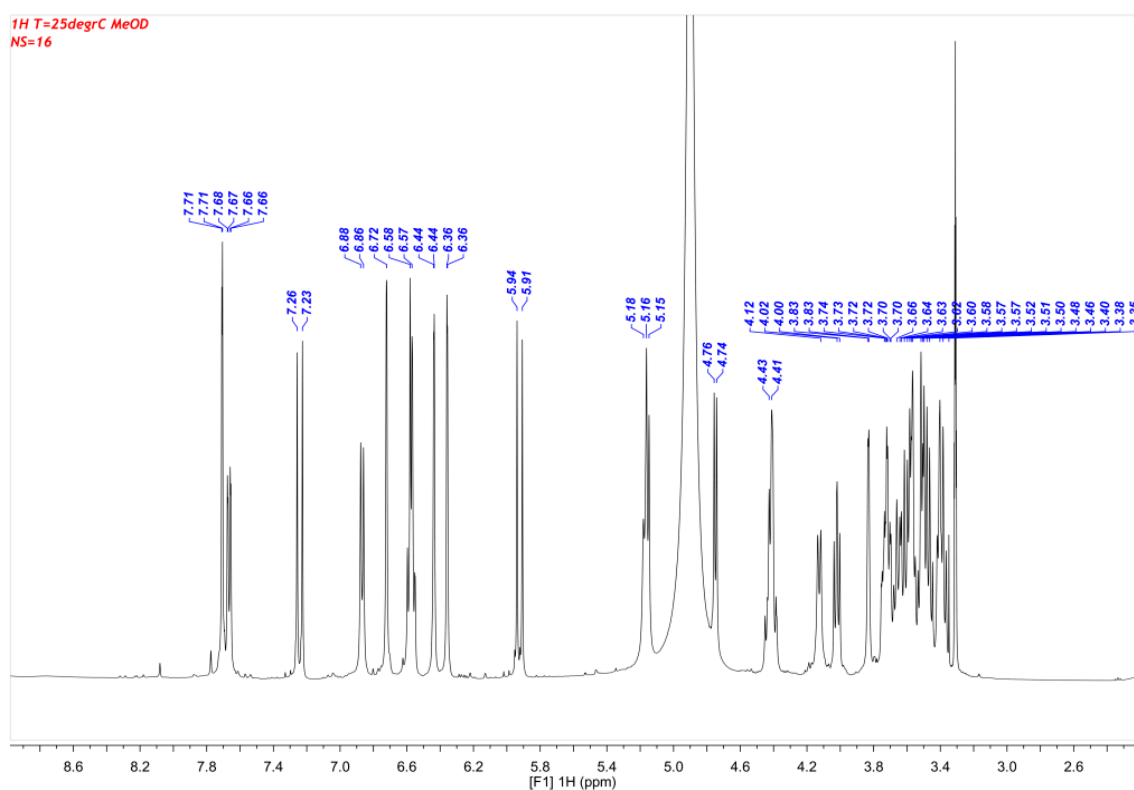

**Figure S45.** 1D  $^{13}\text{C}$ -NMR spectra (1H decoupled and DEPT-135) of compound **5** (methanol- $d_4$ , 125.77 MHz).

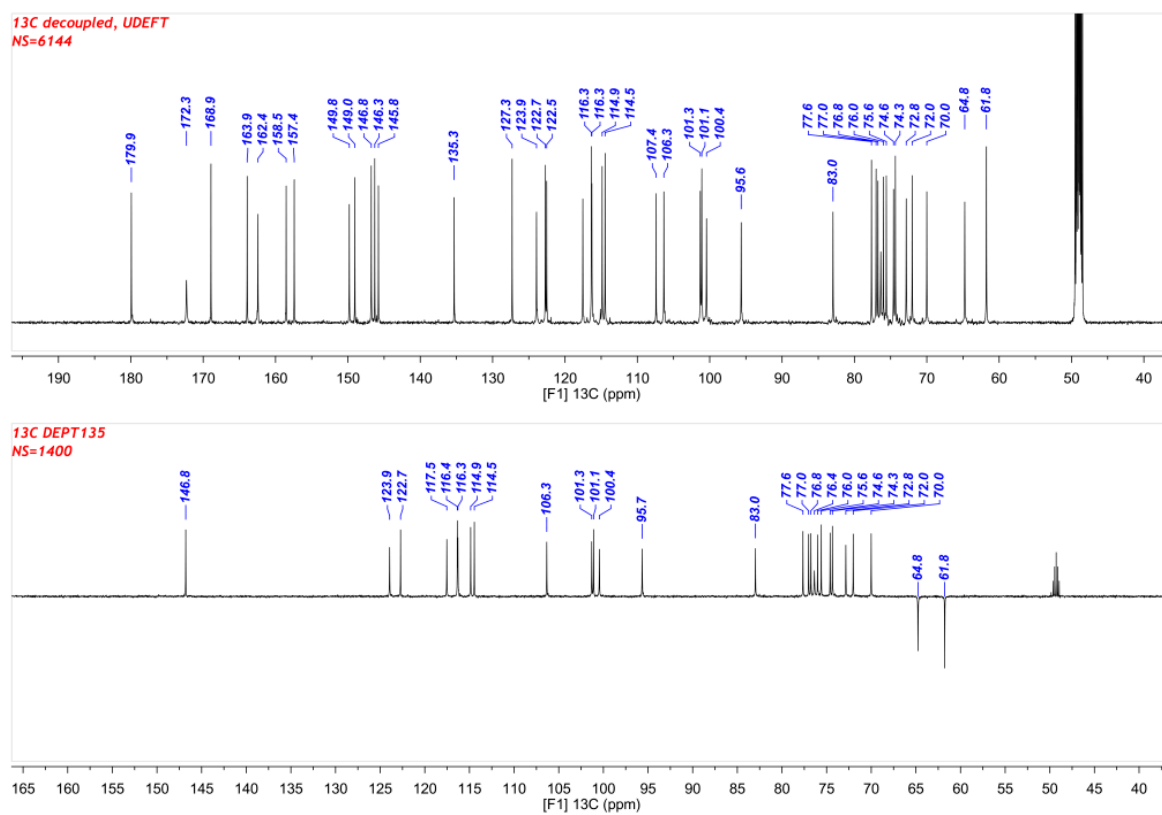

**Figure S46.** 2D g-COSY NMR spectrum of compound **5** (methanol- $d_4$ , 500.18 MHz).

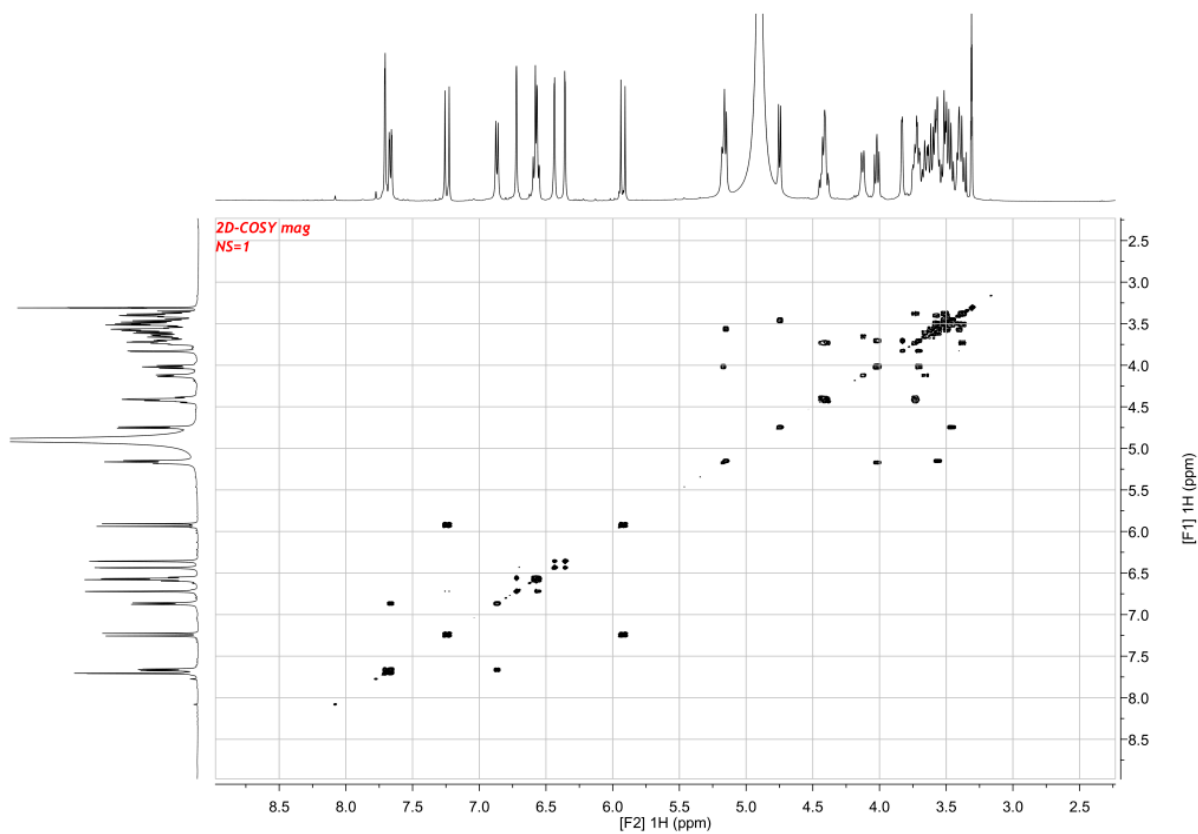

**Figure S47.** 2D TOCSY NMR spectrum of compound **5** (methanol- $d_4$ , 500.18 MHz).

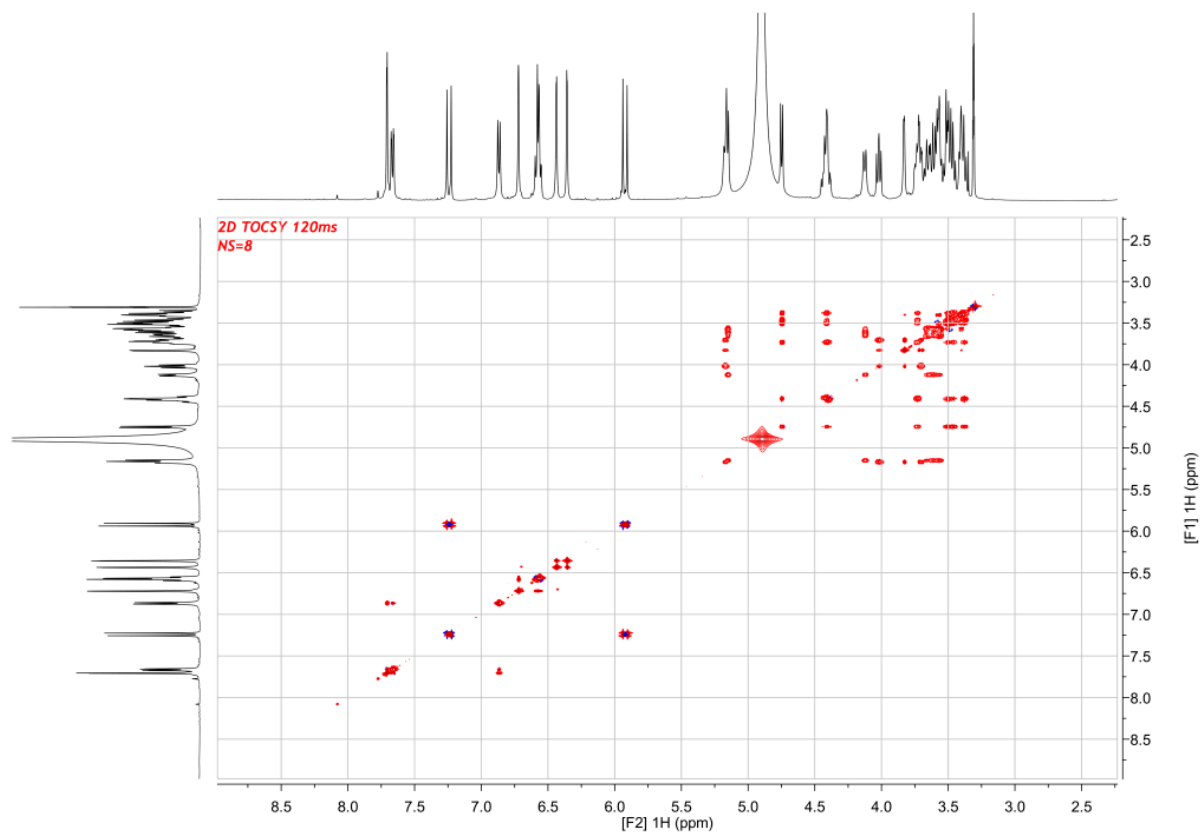

**Figure S48.** 2D ROESY NMR spectrum of compound **5** (methanol- $d_4$ , 500.18 MHz).

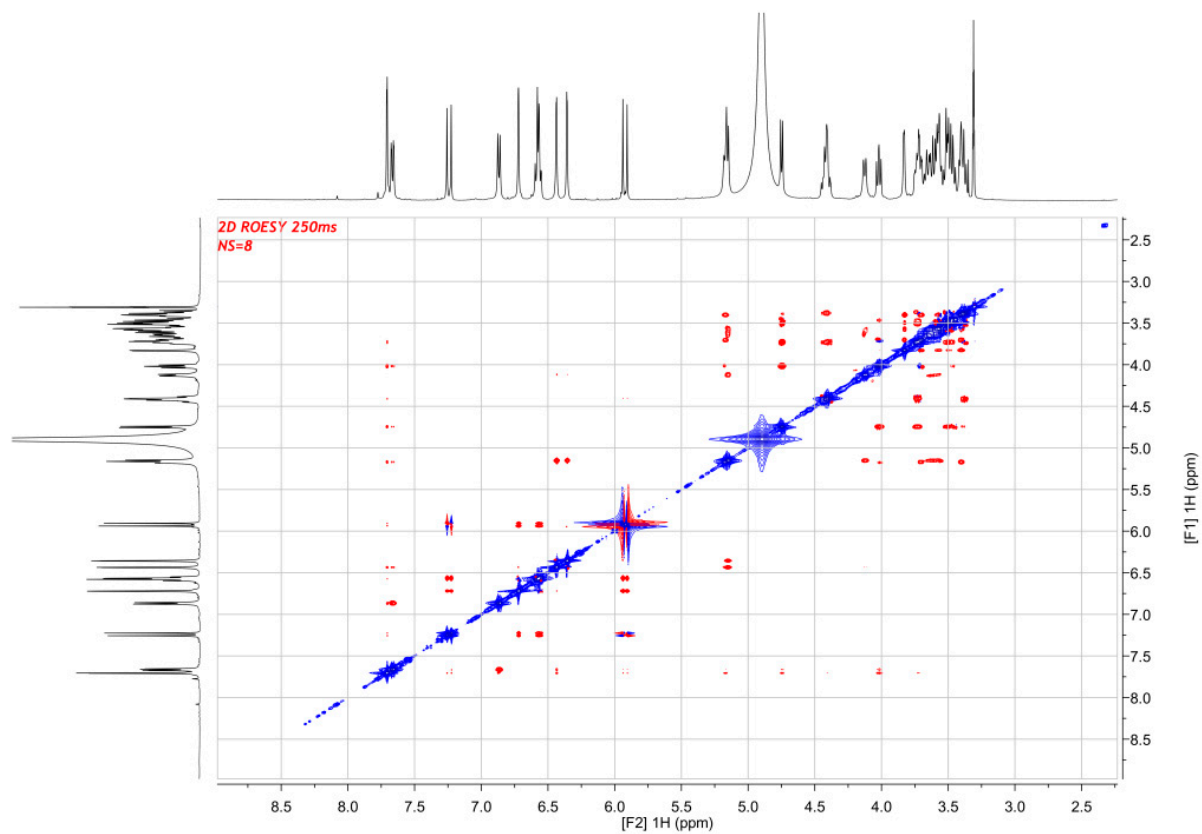

**Figure S49.** 2D g-HSQC-NMR spectrum of compound **5** (methanol-*d*<sub>4</sub>, 500.18 MHz, 125.77 MHz).

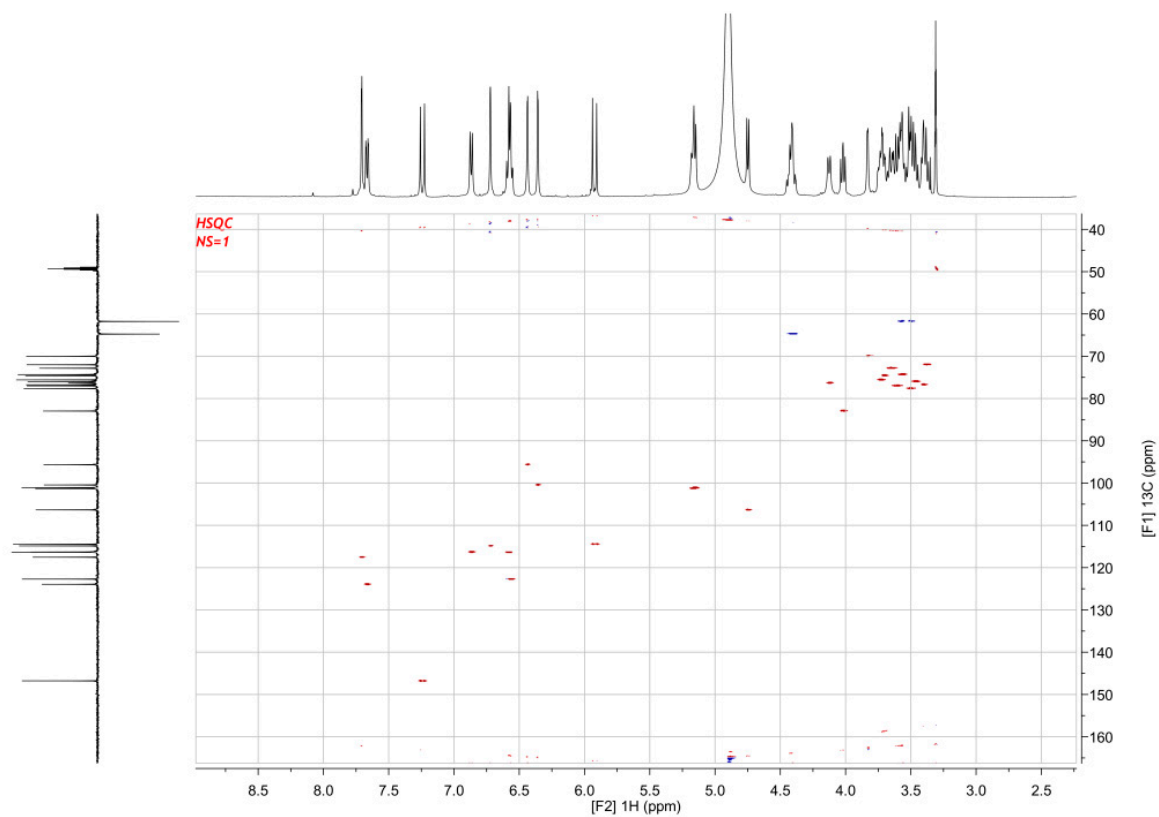

**Figure S50.** 2D g-HSQC-TOCSY NMR spectrum of compound **5** (methanol-*d*<sub>4</sub>, 500.18 MHz, 125.77 MHz).

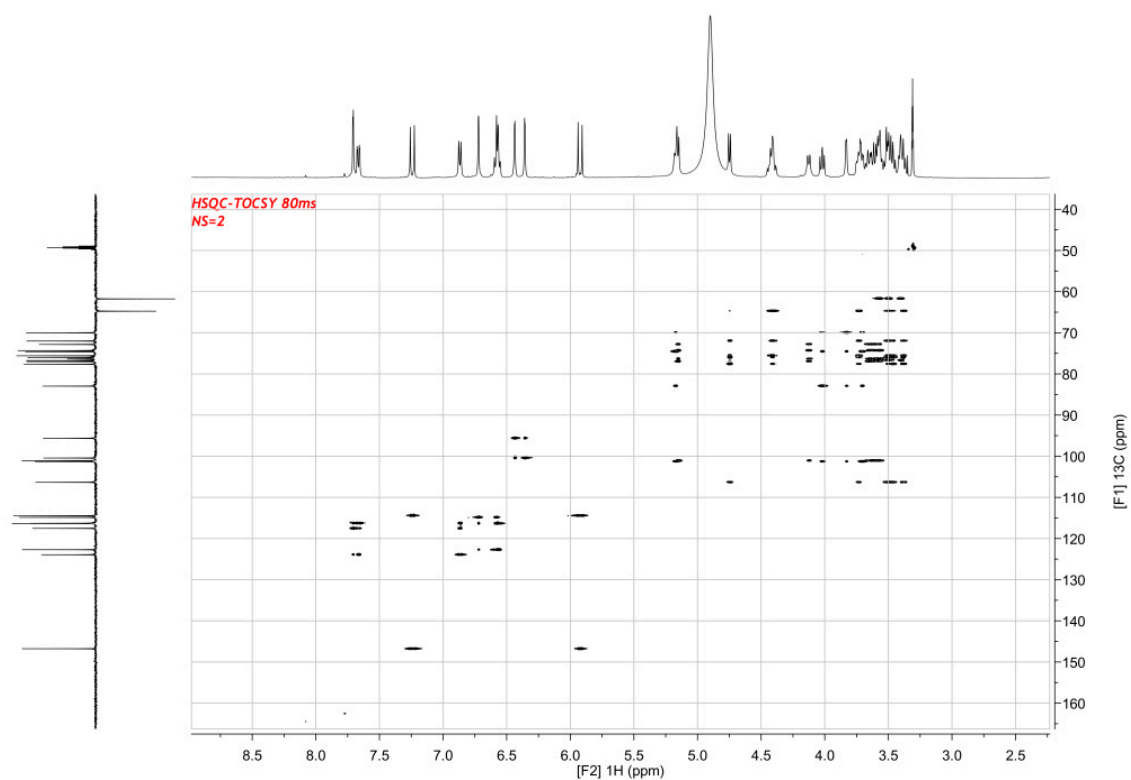

**Figure S51.** 2D g-HMBC-NMR spectrum of compound **5** (methanol- $d_4$ , 500.18 MHz, 125.77 MHz).

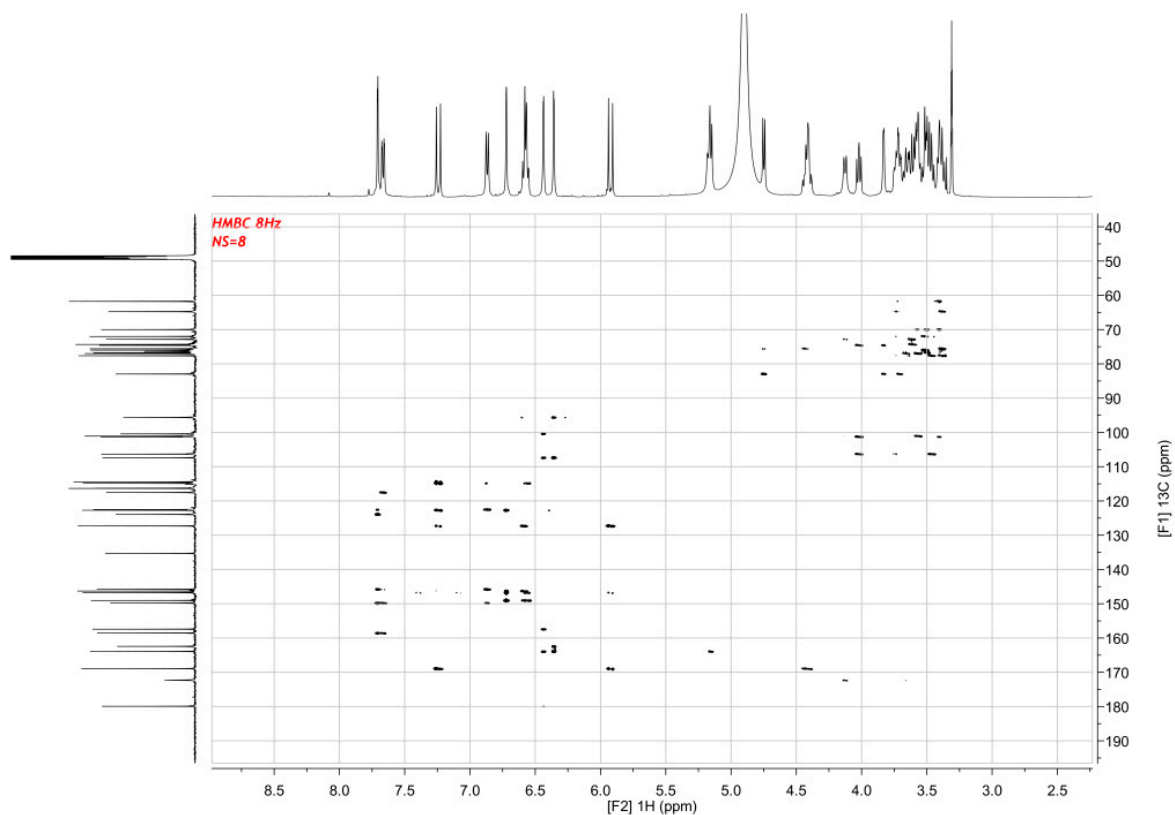

**Figure S52.** 1D TOCSY and 1D ROESY NMR subspectra of H-1(7-*O*- $\beta$ -GlcA) and H-1(3-*O*- $\beta$ -Gal) in compound **5** (methanol- $d_4$ , 500.18 MHz).

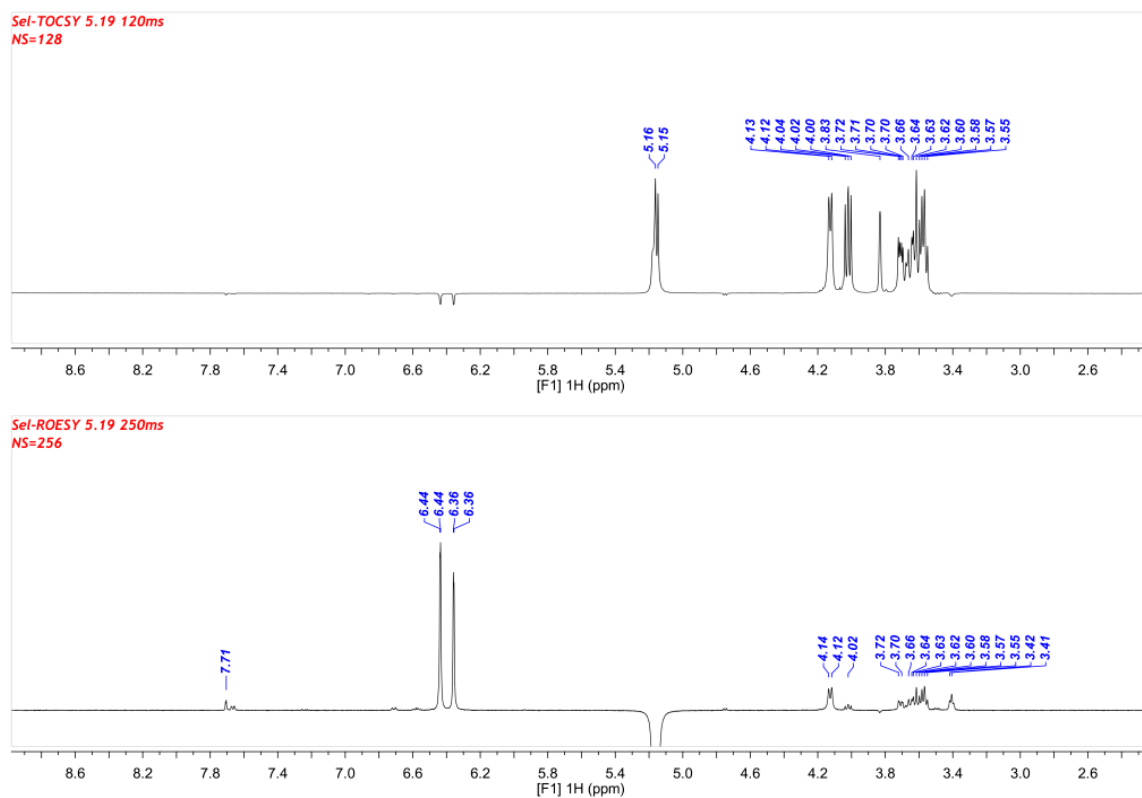



**Figure S53.** 1D TOCSY and 1D ROESY NMR subspectra of H-1(<sub>2</sub>Gal-*O*-β-Glc) in compound **5** (methanol-*d*<sub>4</sub>, 500.18 MHz).

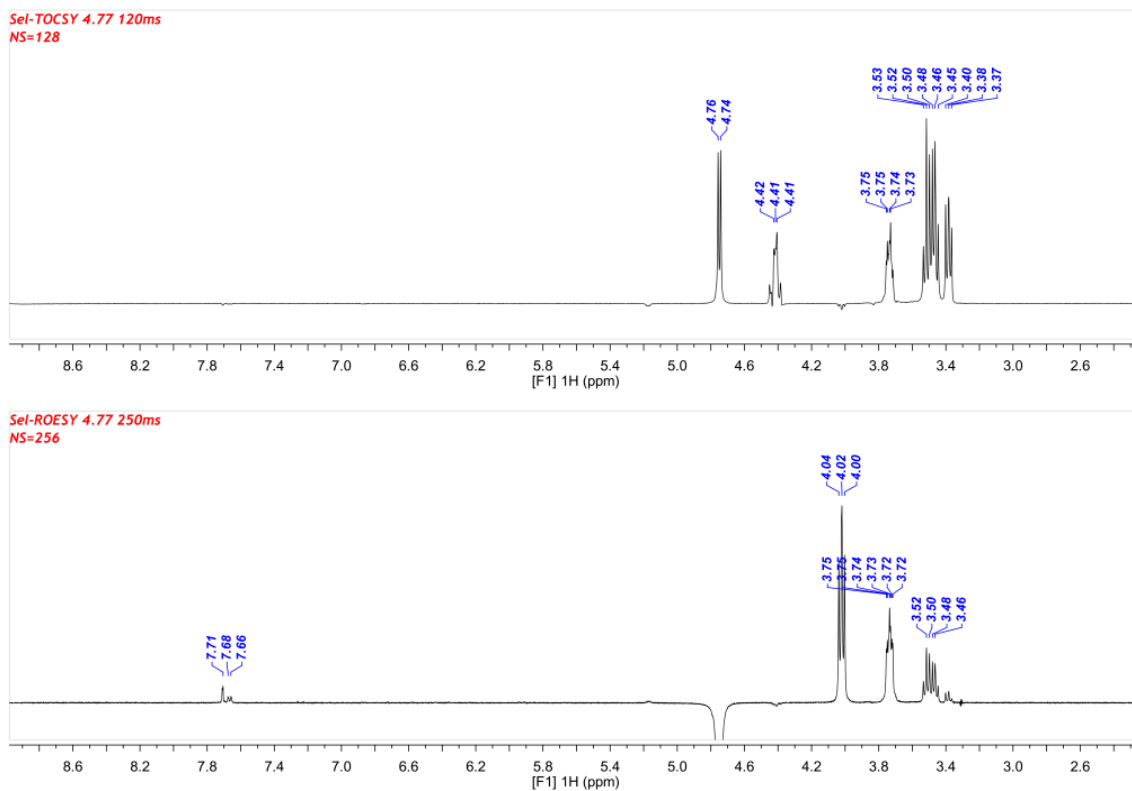

## Compound 6

**Figure S54.** 1D <sup>1</sup>H-NMR spectrum of compound **6** (methanol-*d*<sub>4</sub>, 500.18 MHz).

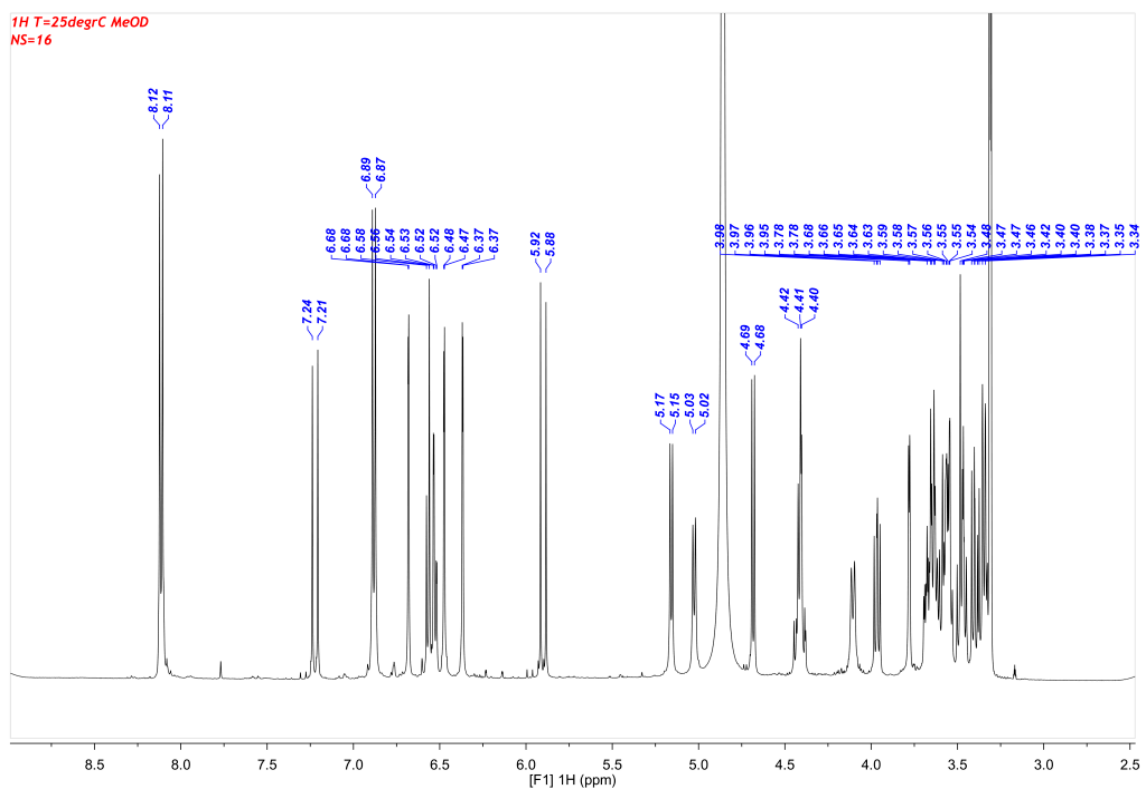

**Figure S55.** 1D  $^{13}\text{C}$ -NMR spectra (1H decoupled and DEPT-135) of compound **6** (methanol- $d_4$ , 125.77 MHz).

$^{13}\text{C}$  decoupled, UDEFT  
NS=27648

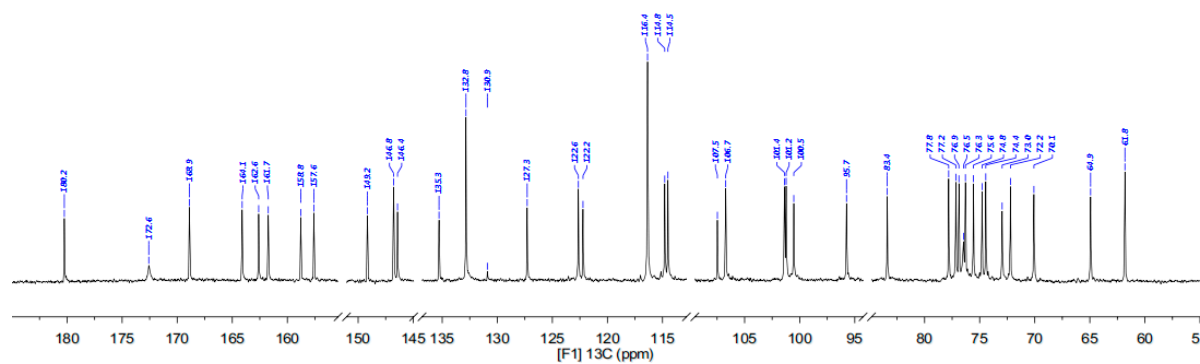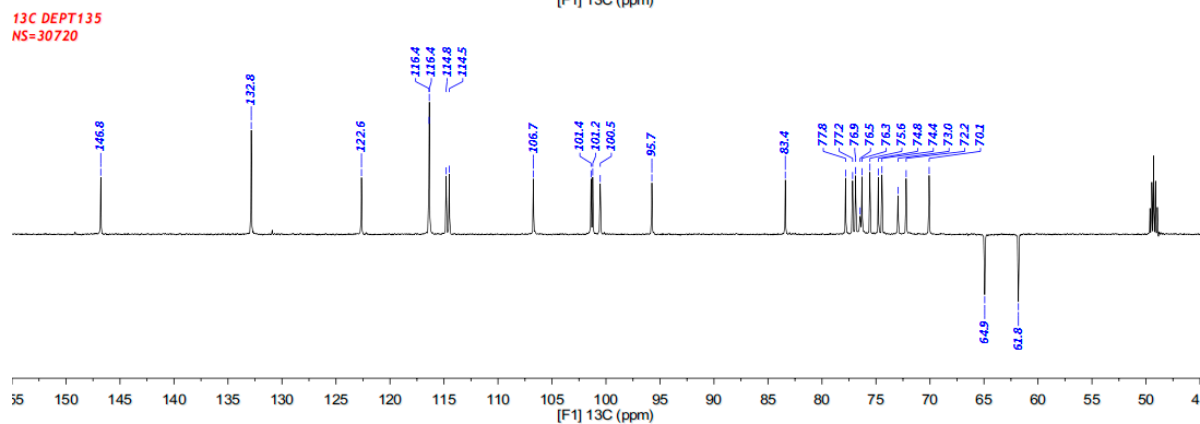

**Figure S56.** 2D g-COSY NMR spectrum of compound **6** (methanol- $d_4$ , 500.18 MHz).

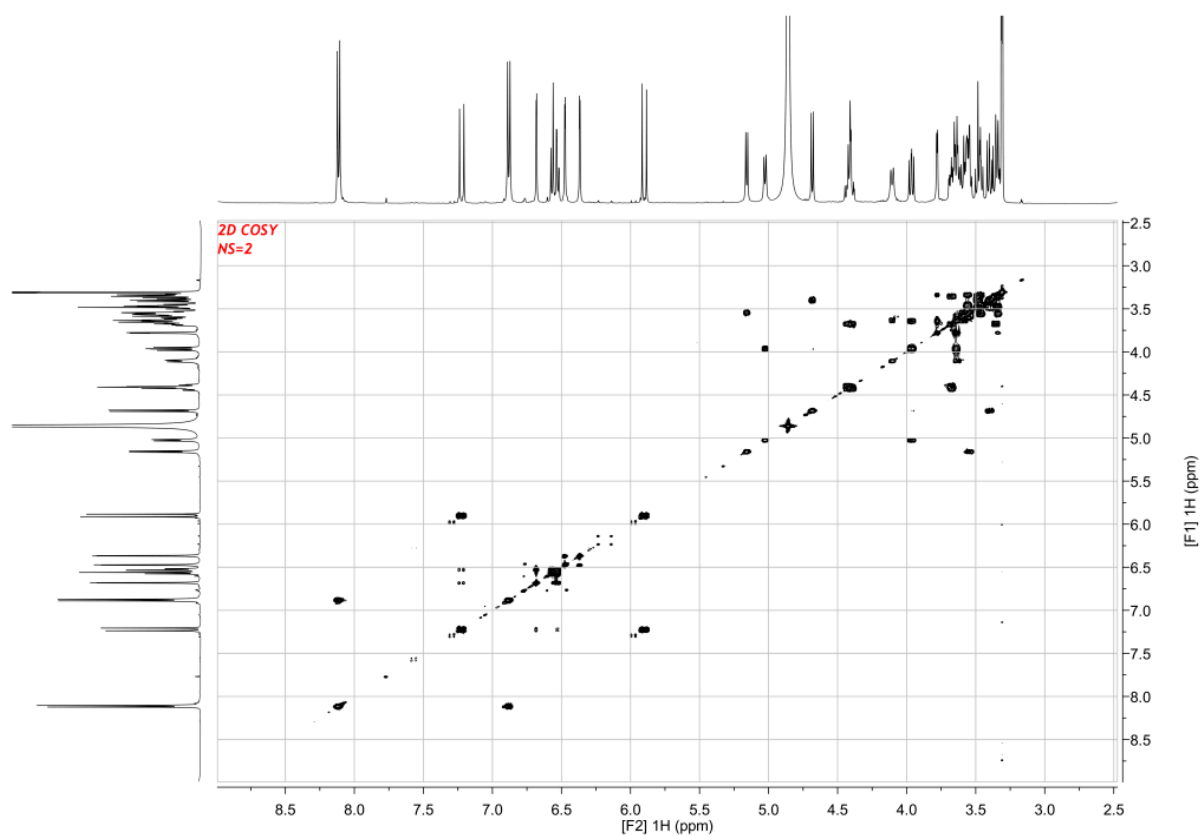

**Figure S57.** 2D TOCSY NMR spectrum of compound **6** (methanol- $d_4$ , 500.18 MHz).

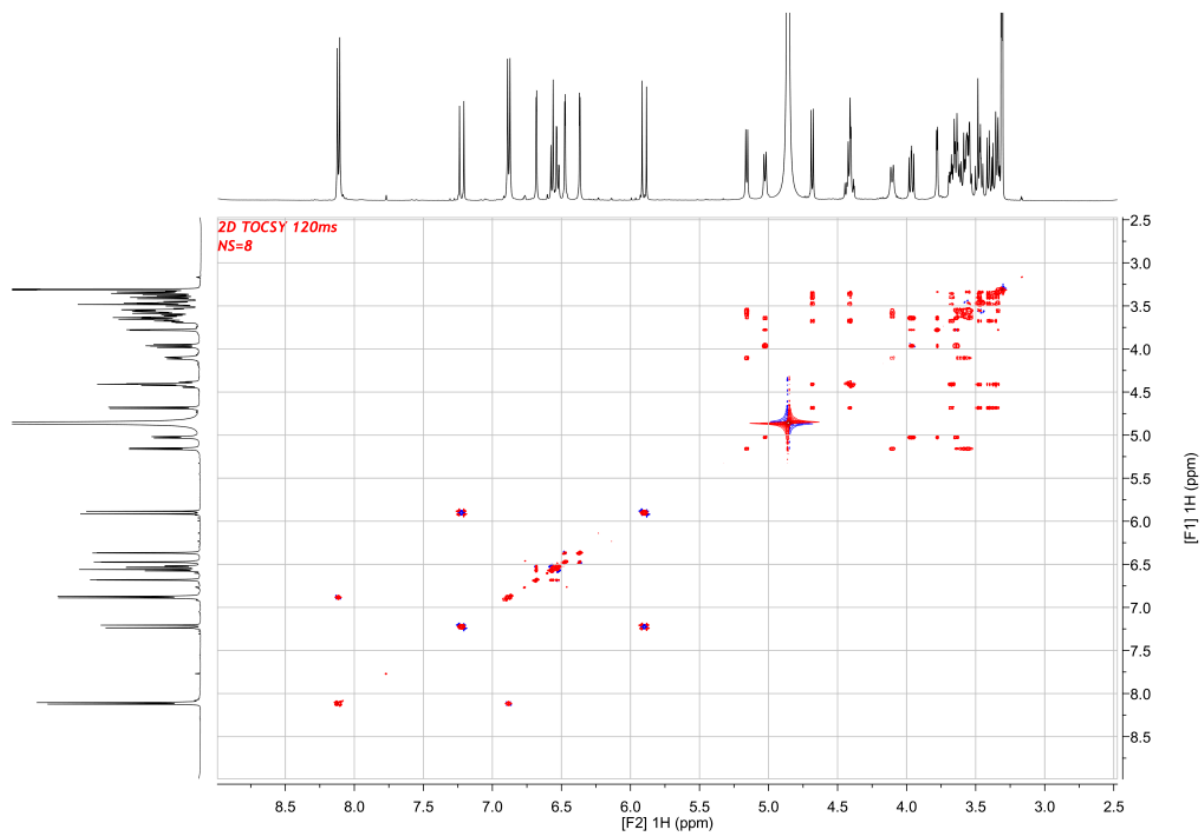

**Figure S58.** 2D ROESY NMR spectrum of compound **6** (methanol- $d_4$ , 500.18 MHz).

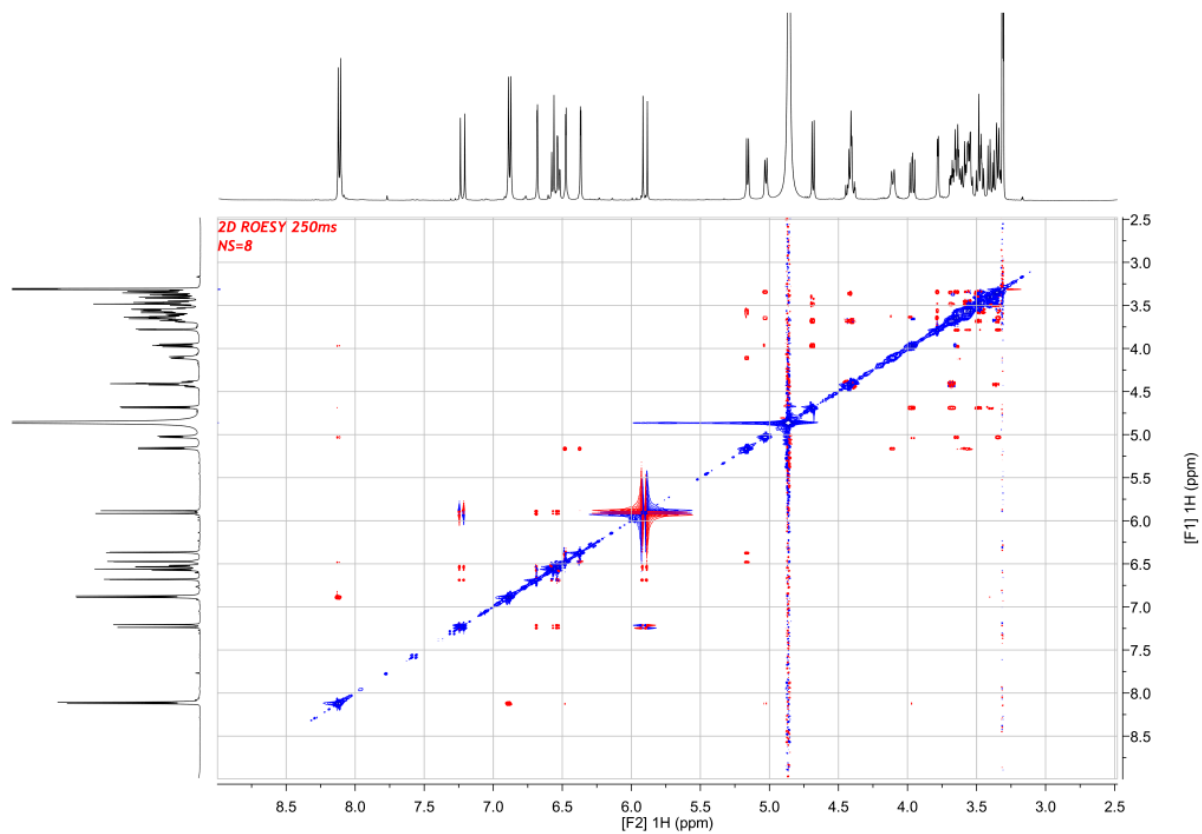

**Figure S59.** 2D *g*-HSQC-NMR spectrum of compound **6** (methanol-*d*<sub>4</sub>, 500.18 MHz, 125.77 MHz).

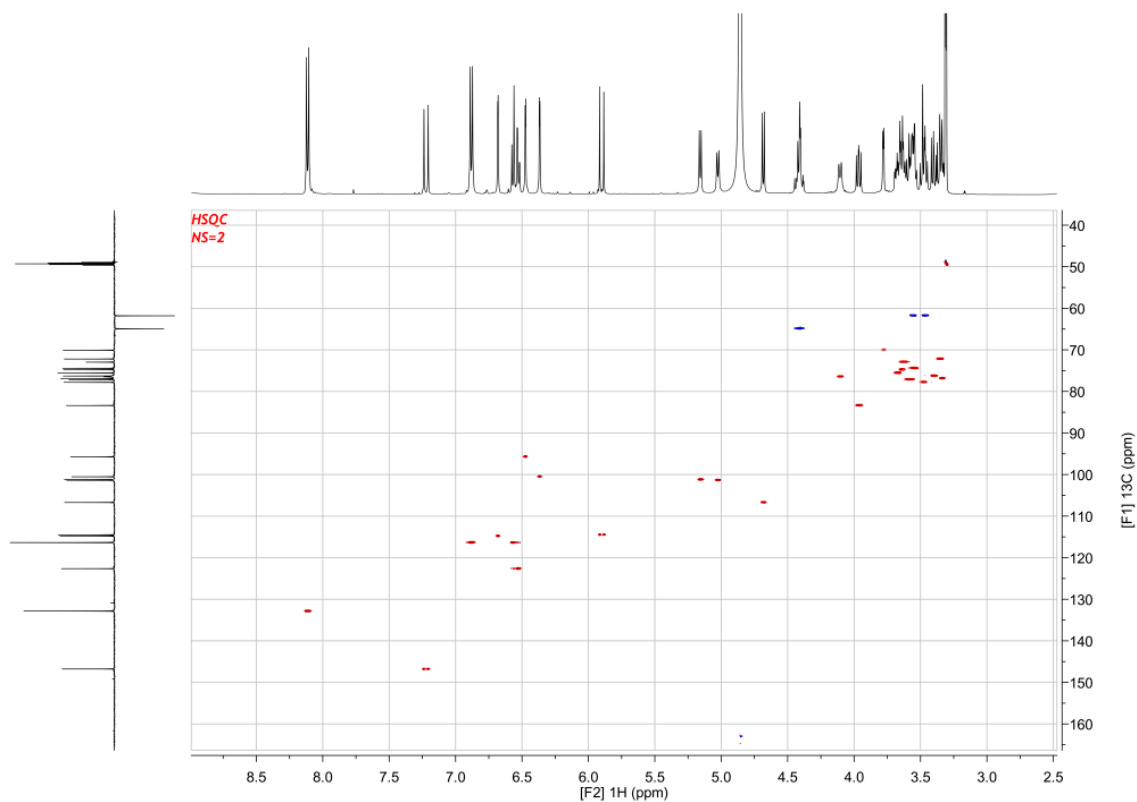

**Figure S60.** 2D *g*-HSQC-TOCSY NMR spectrum of compound **6** (methanol-*d*<sub>4</sub>, 500.18 MHz, 125.77 MHz).

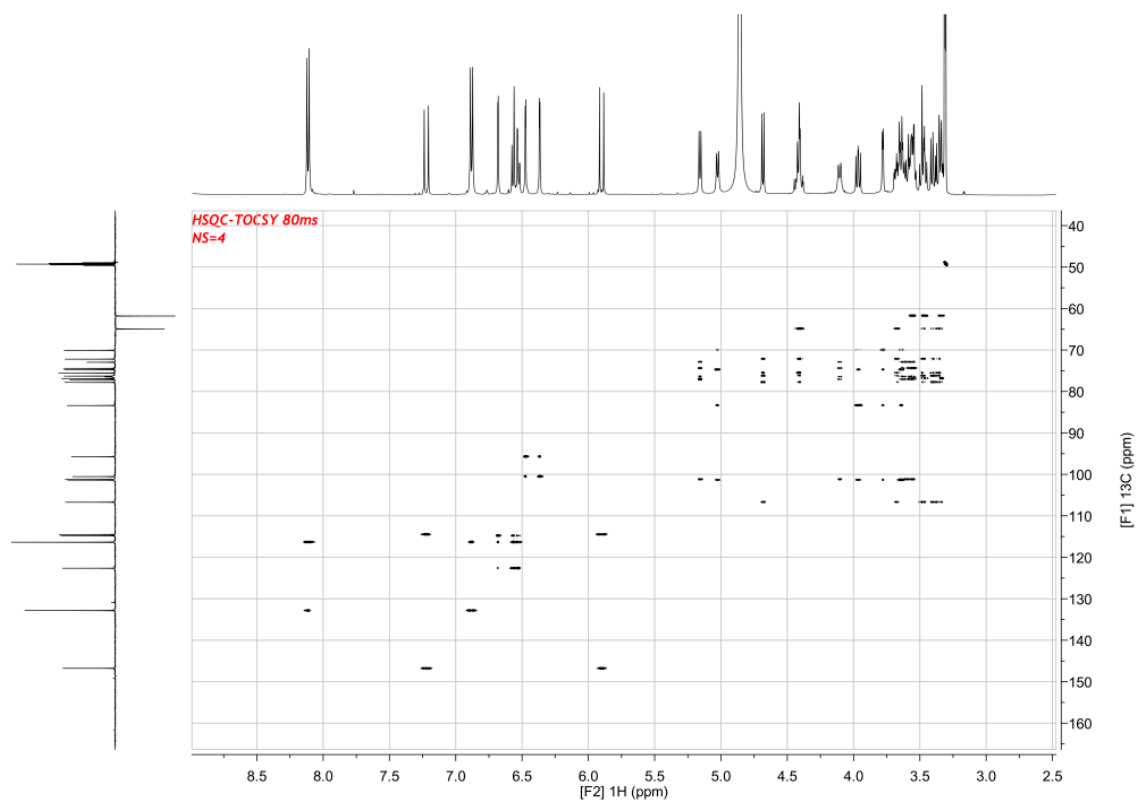

**Figure S61.** 2D g-HMBC-NMR spectrum of compound **6** (methanol- $d_4$ , 500.18 MHz, 125.77 MHz).

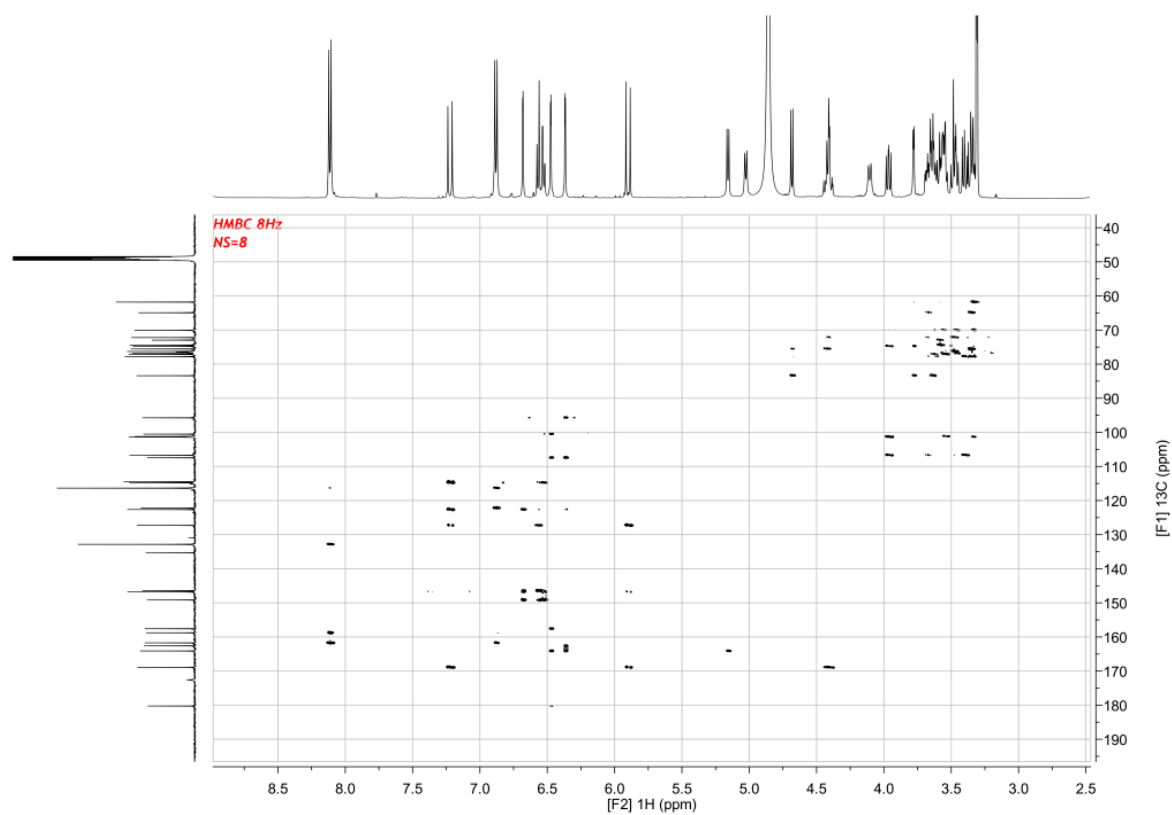

**Figure S62.** 1D TOCSY and 1D ROESY NMR subspectra of H-1( $7-O-\beta$ -GlcA) in compound **6** (methanol- $d_4$ , 500.18 MHz).

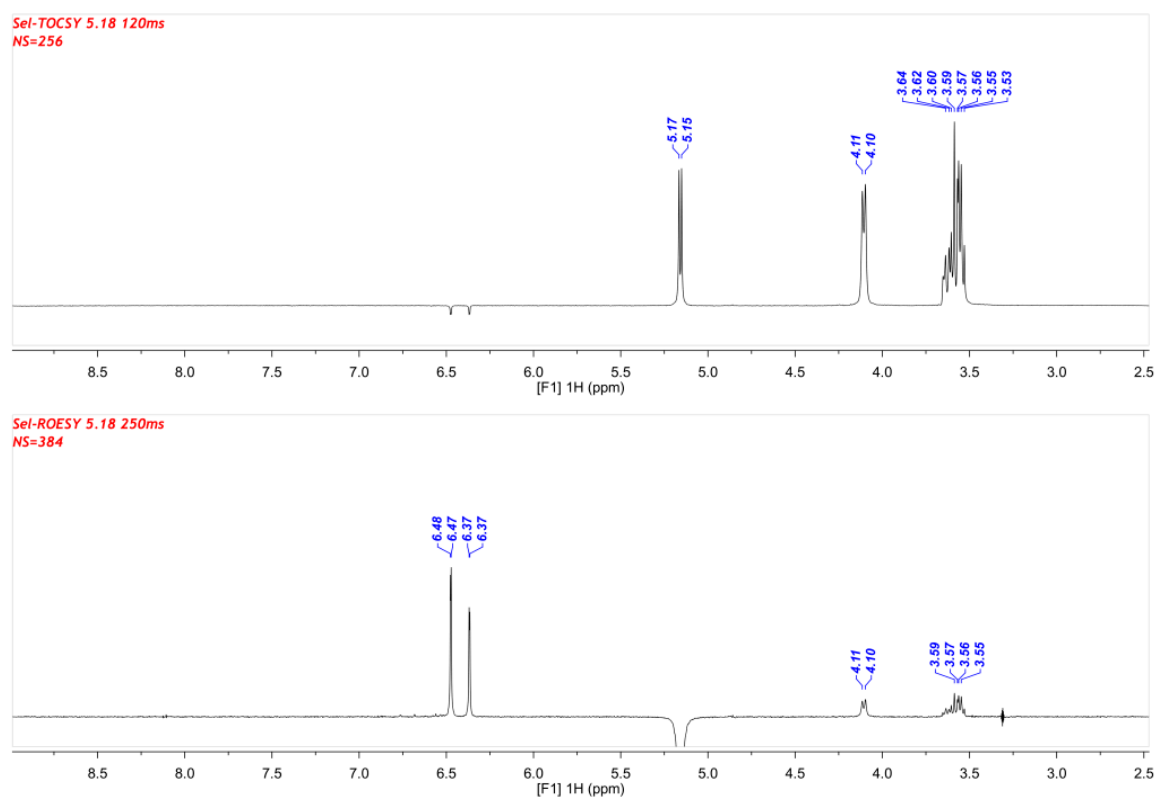

**Figure S63.** 1D TOCSY and 1D ROESY NMR subspectra of H-1(3-*O*- $\beta$ -Gal) in compound **6** (methanol-*d*<sub>4</sub>, 500.18 MHz).

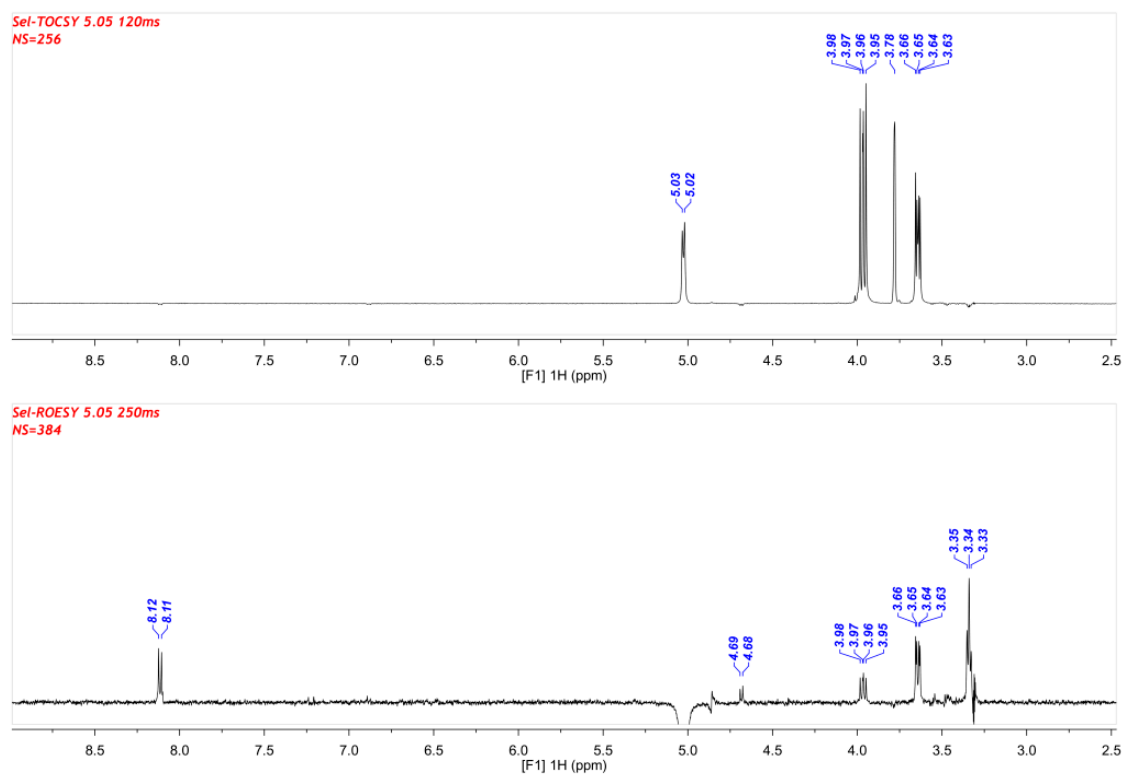

**Figure S64.** 1D TOCSY and 1D ROESY NMR subspectra of H-1(2<sup>Gal</sup>-*O*- $\beta$ -Glc) in compound **6** (methanol-*d*<sub>4</sub>, 500.18 MHz).

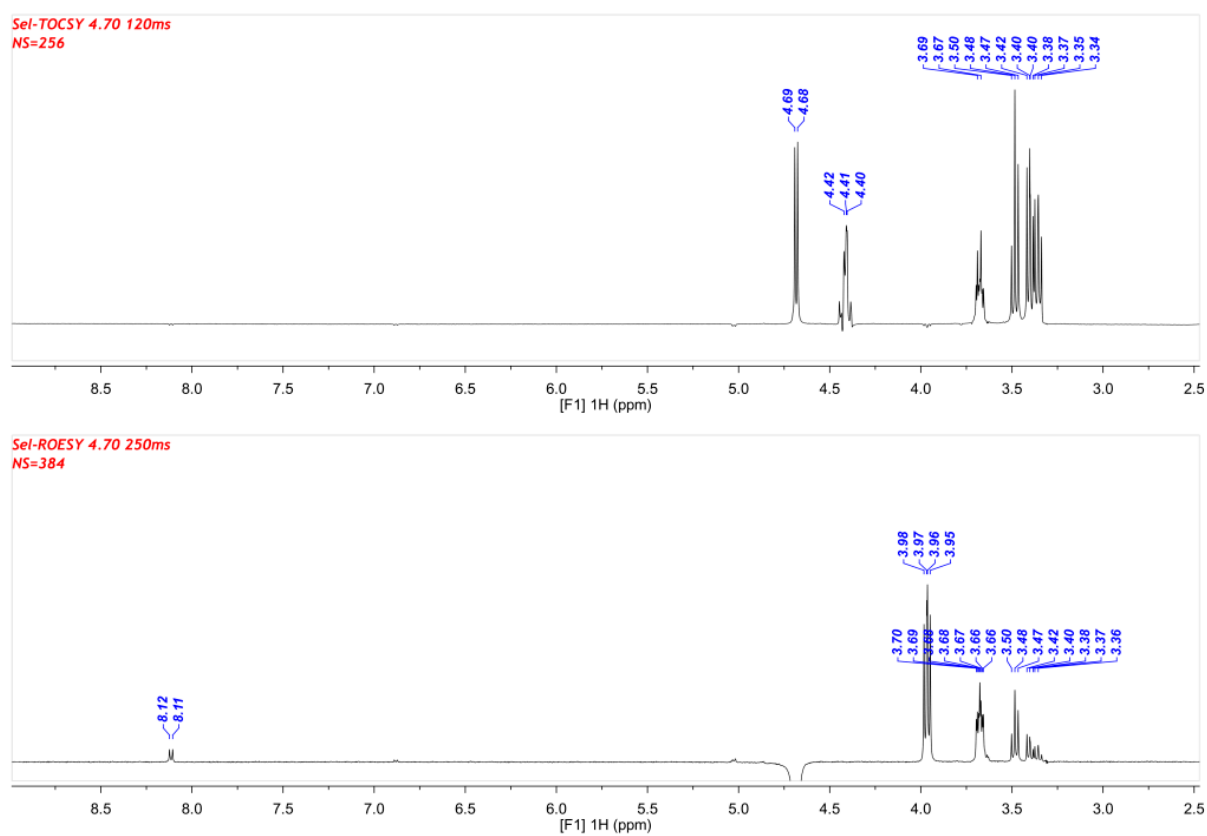

## Compound 7

Figure S65. 1D  $^1\text{H}$ -NMR spectrum of compound 7 (methanol- $d_4$ , 500.18 MHz).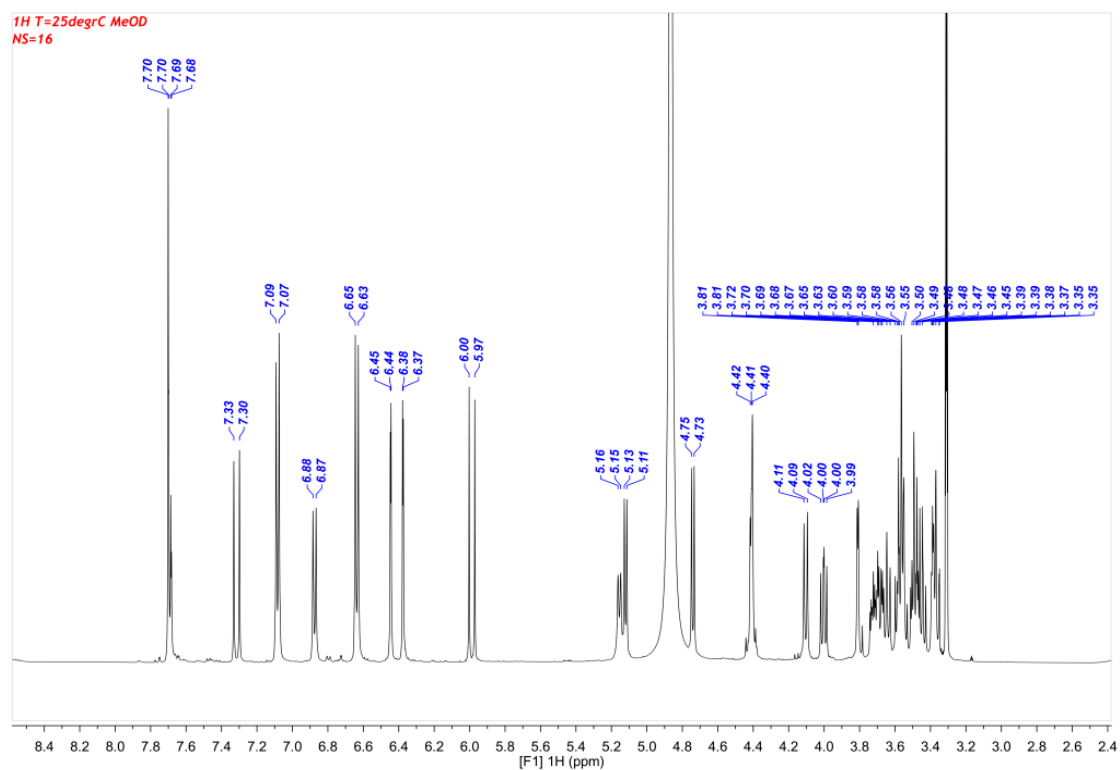Figure S66. 1D  $^{13}\text{C}$ -NMR spectra (1H decoupled and DEPT-135) of compound 7 (methanol- $d_4$ , 125.77 MHz).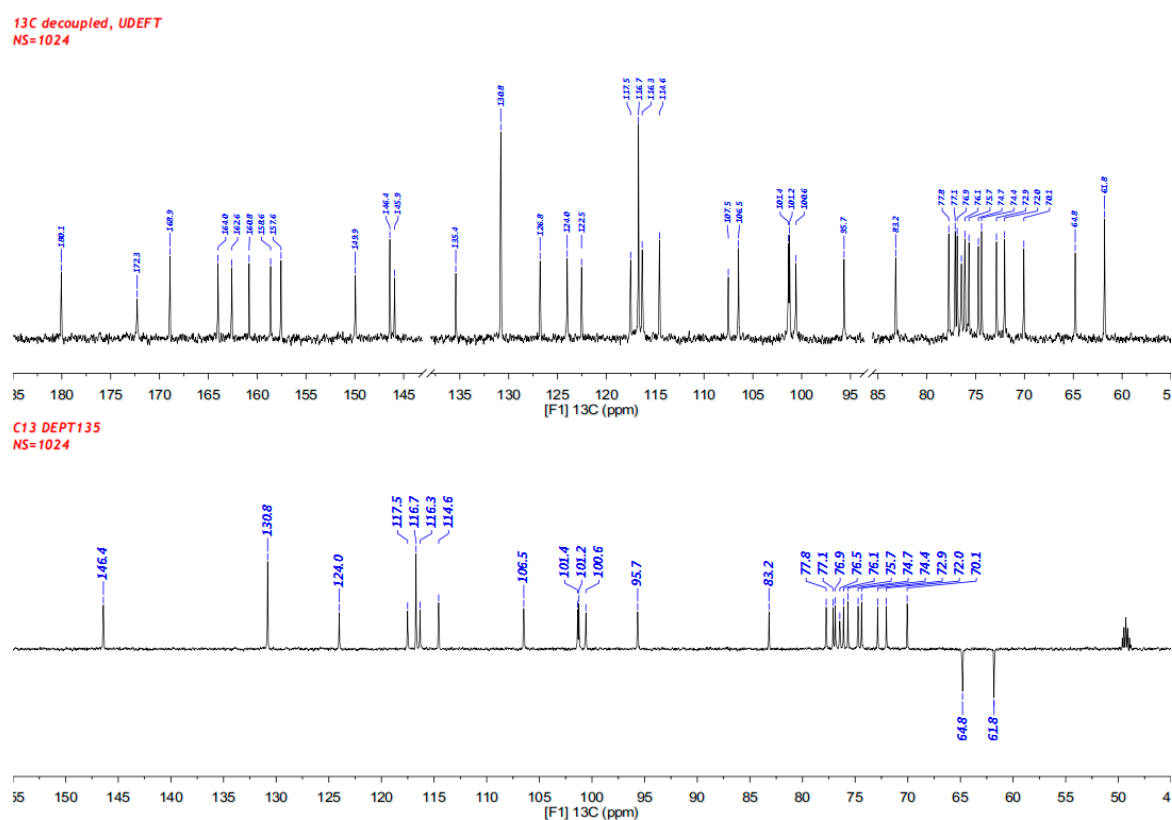

**Figure S67.** 2D g-COSY NMR spectrum of compound **7** (methanol- $d_4$ , 500.18 MHz).

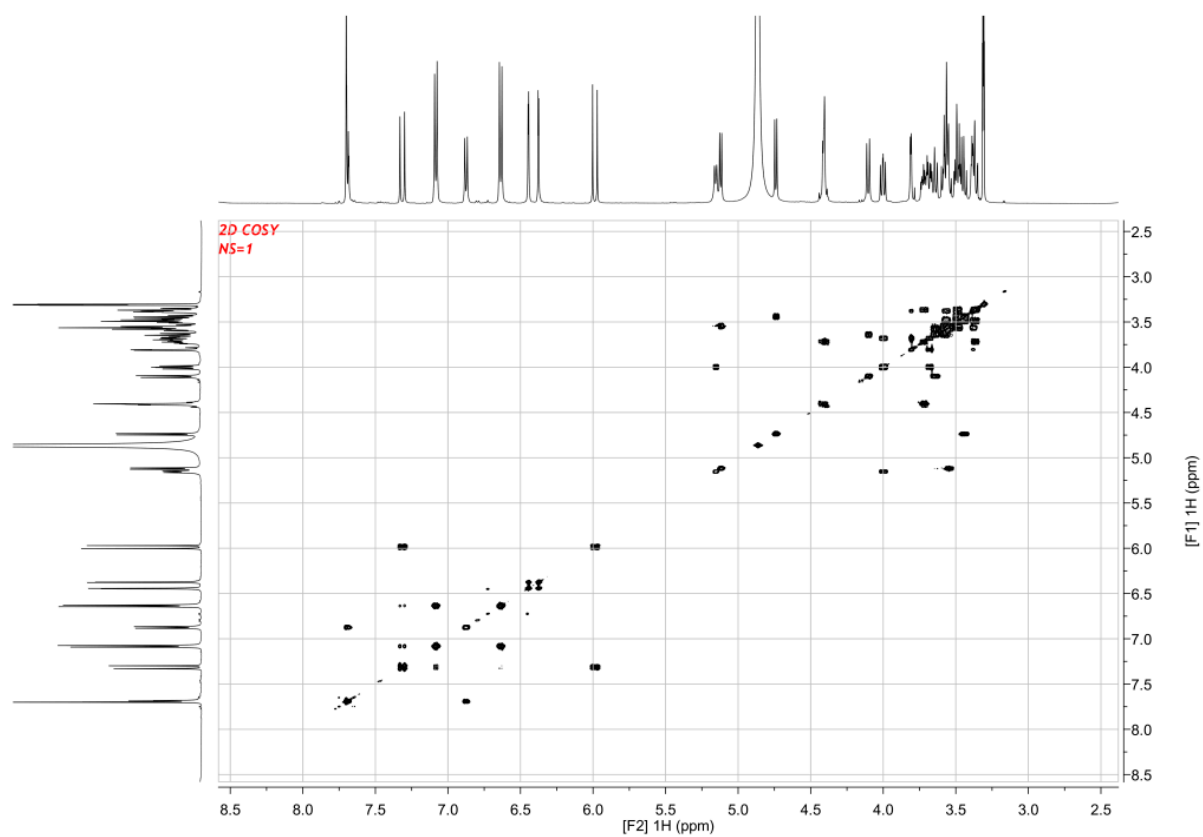

**Figure S68.** 2D TOCSY NMR spectrum of compound **7** (methanol- $d_4$ , 500.18 MHz).

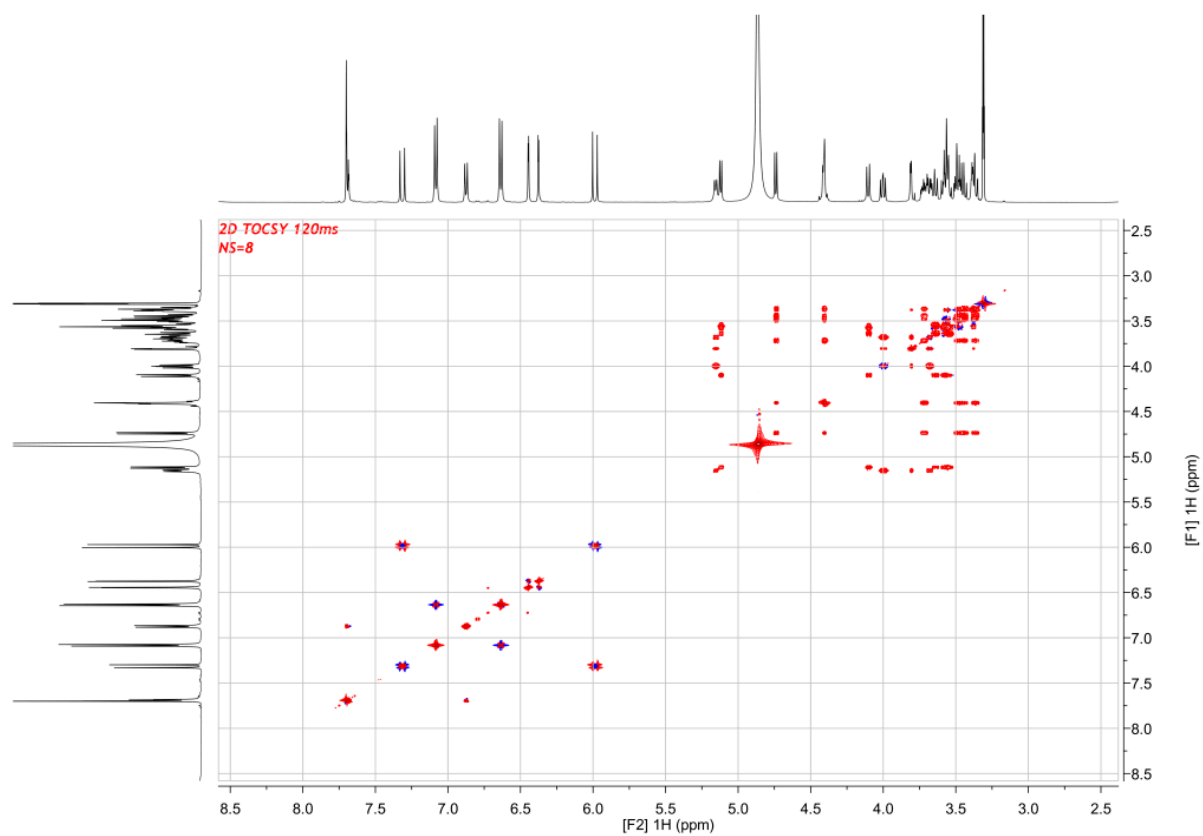



**Figure S69.** 2D ROESY NMR spectrum of compound **7** (methanol-*d*<sub>4</sub>, 500.18 MHz).

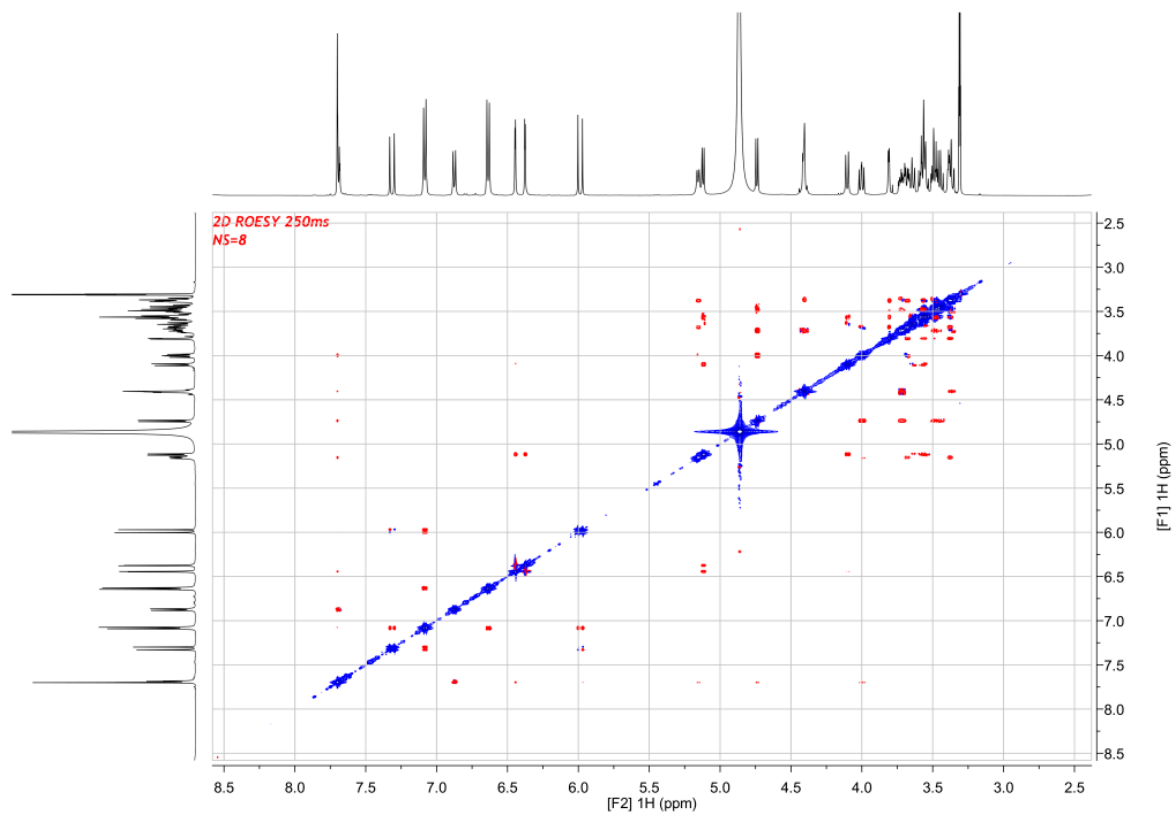

**Figure S70.** 2D g-HSQC-NMR spectrum of compound **7** (methanol-*d*<sub>4</sub>, 500.18 MHz, 125.77 MHz).

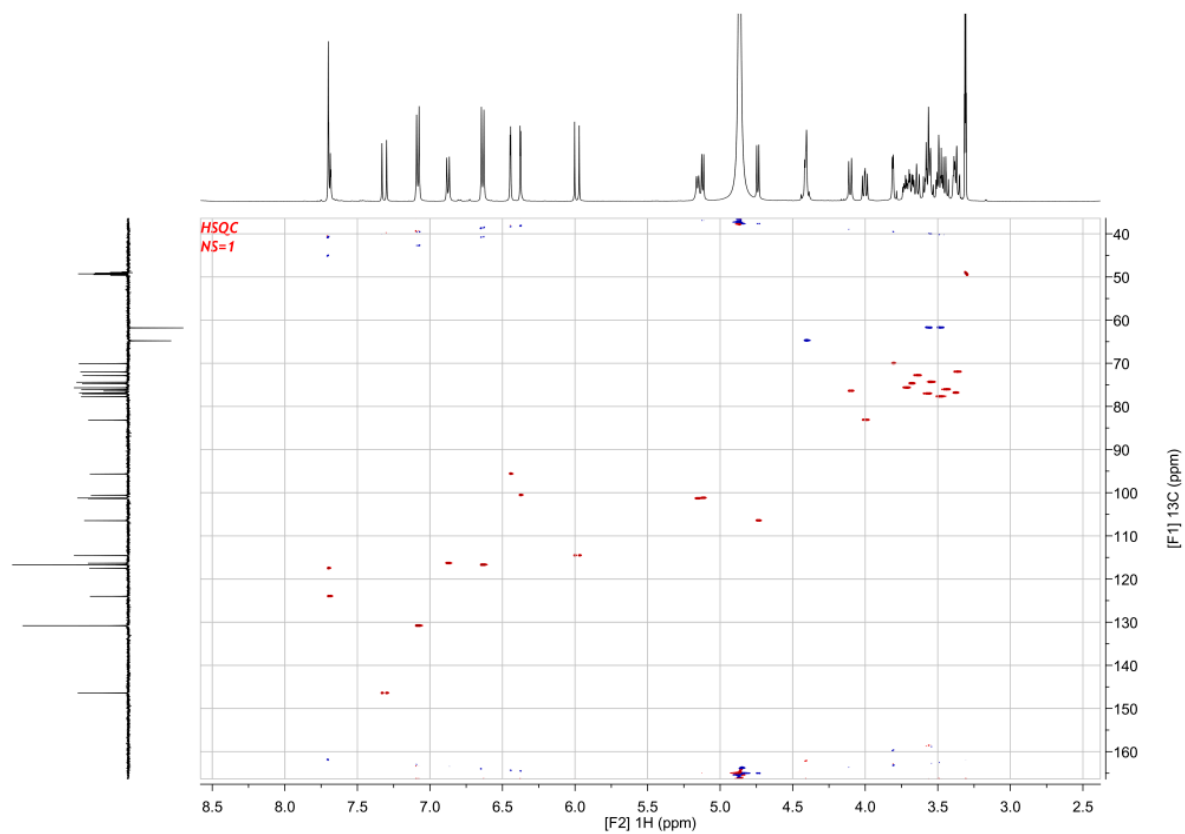

**Figure S71.** 2D g-HSQC-TOCSY NMR spectrum of compound **7** (methanol- $d_4$ , 500.18 MHz, 125.77 MHz).

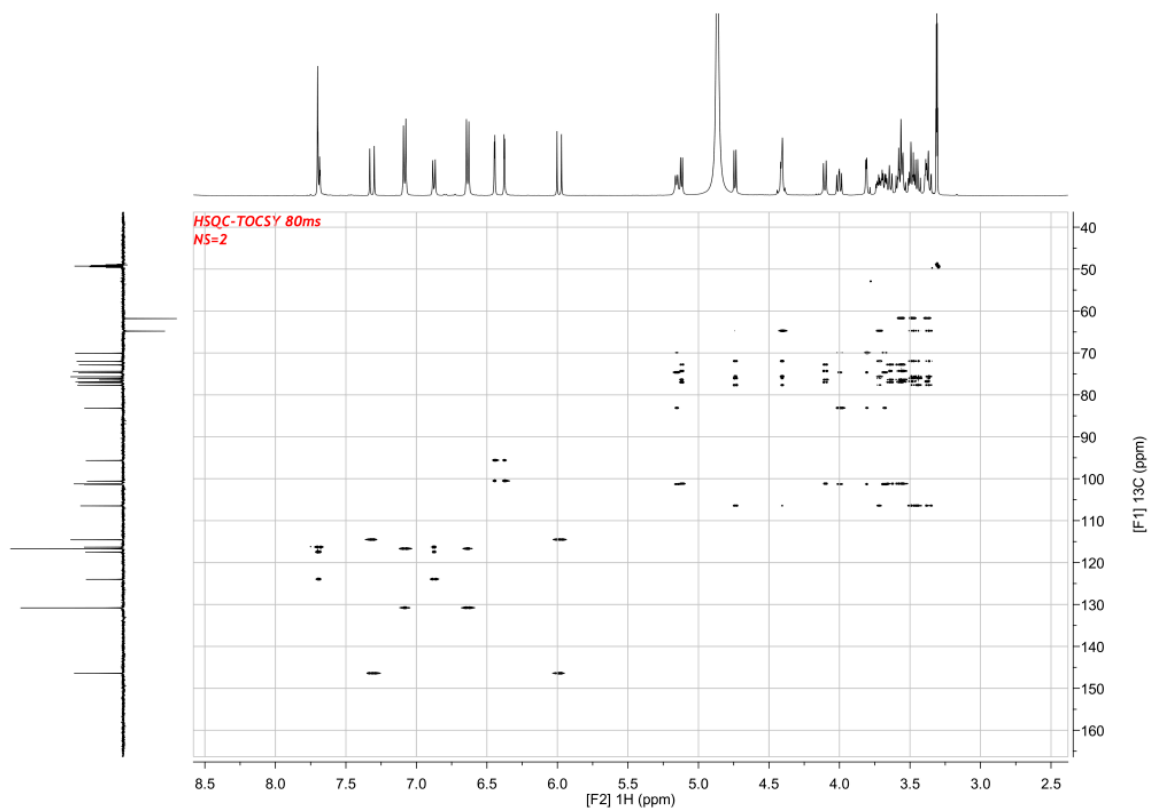

**Figure S72.** 2D g-HMBC-NMR spectrum of compound **7** (methanol- $d_4$ , 500.18 MHz, 125.77 MHz).

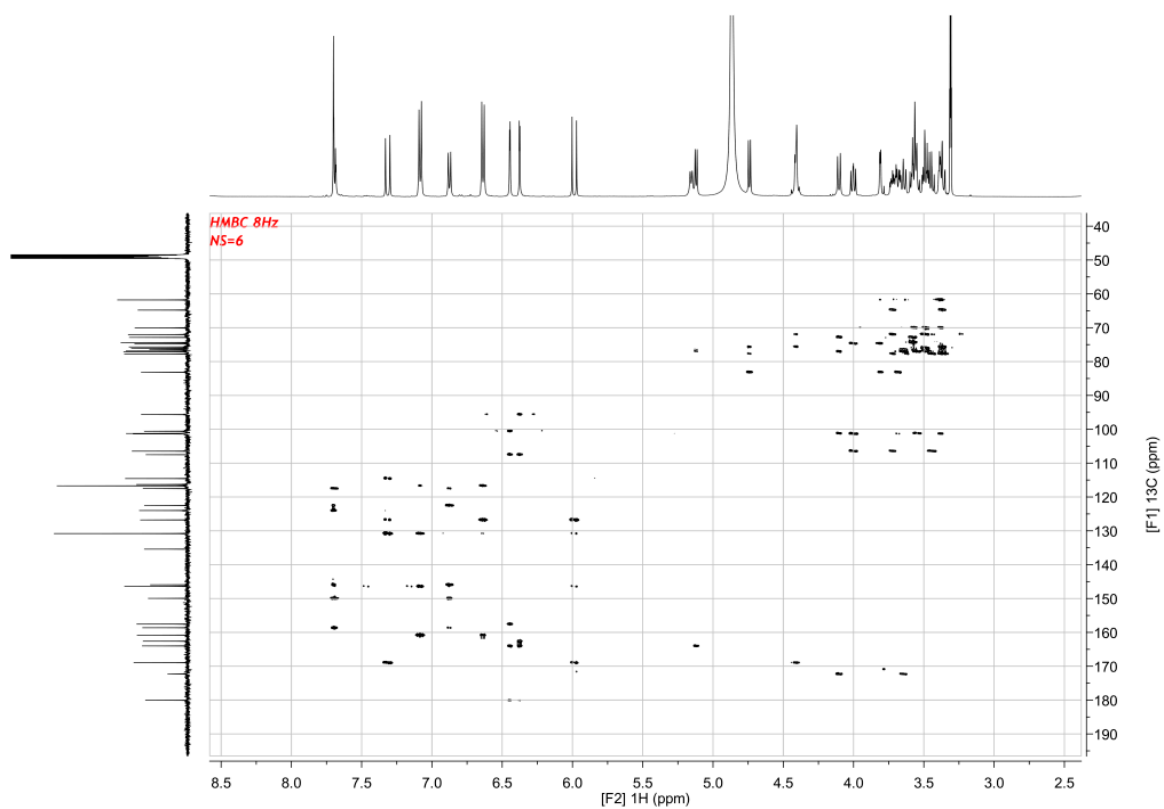

**Figure S73.** 1D TOCSY and 1D ROESY NMR subspectra of H-1(*7-O*- $\beta$ -GlcA) in compound **7** (methanol-*d*<sub>4</sub>, 500.18 MHz).

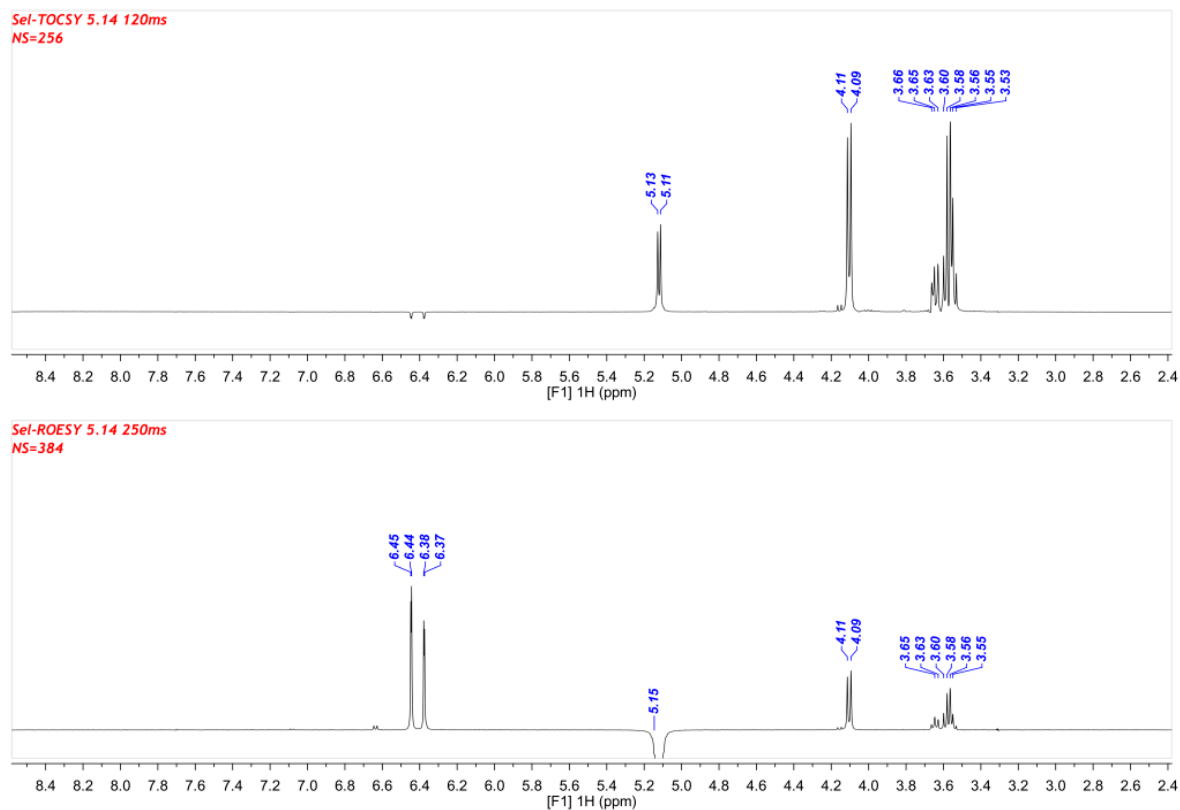

**Figure S74.** 1D TOCSY and 1D ROESY NMR subspectra of H-1(*3-O*- $\beta$ -Gal) in compound **7** (methanol-*d*<sub>4</sub>, 500.18 MHz).

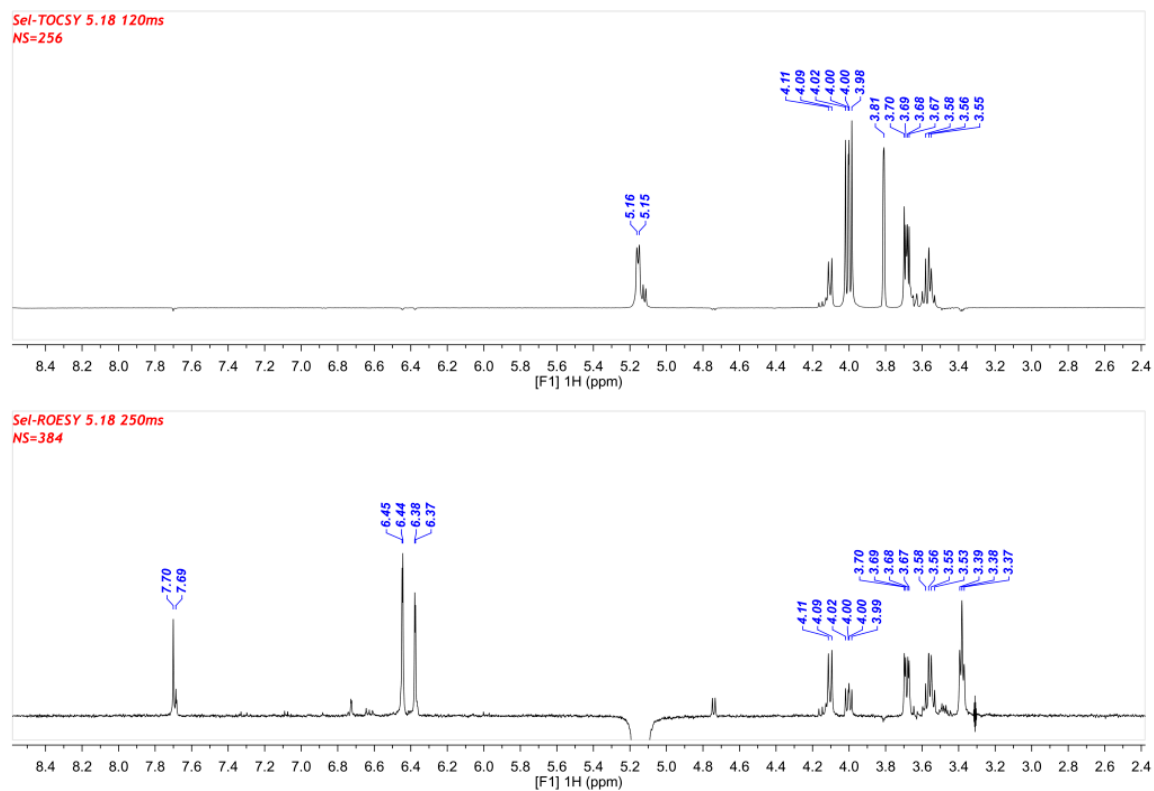

**Figure S75.** 1D TOCSY and 1D ROESY NMR subspectra of H-1<sub>(2</sub><sup>Gal</sup>-O-β-Glc) in compound **7** (methanol-*d*<sub>4</sub>, 500.18 MHz).

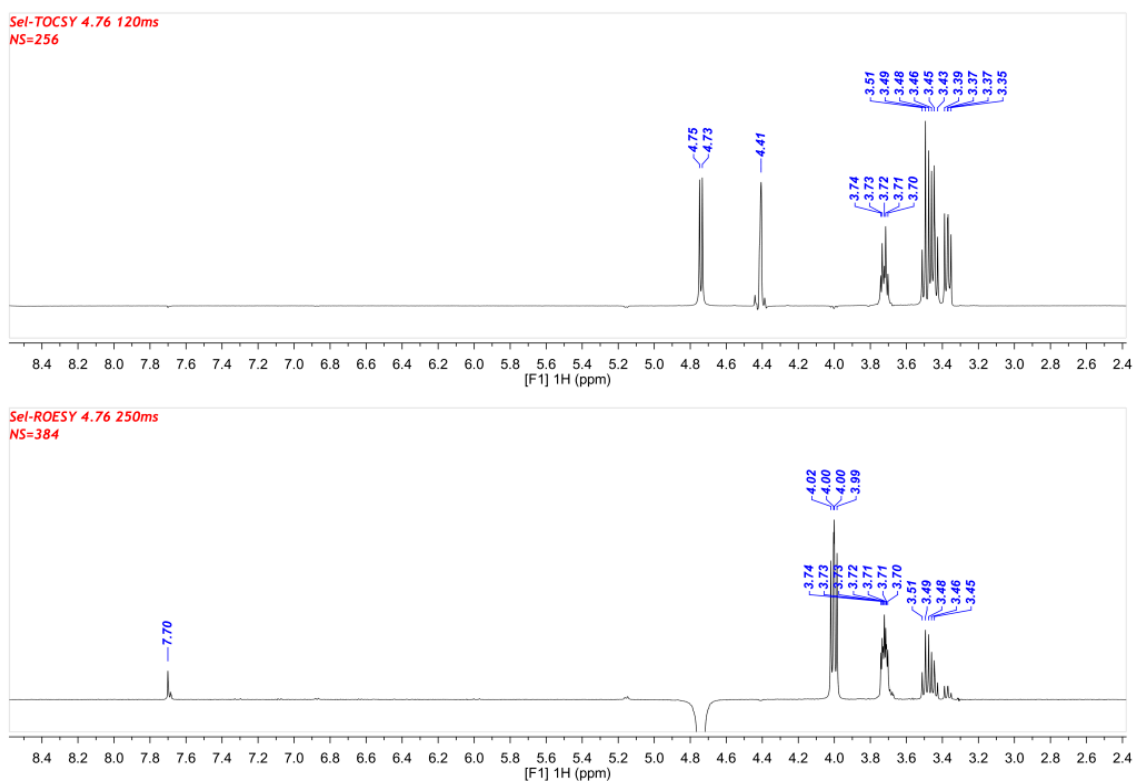

## Compound **8**

**Figure S76.** 1D <sup>1</sup>H-NMR spectrum of compound **8** (methanol-*d*<sub>4</sub>, 500.18 MHz).

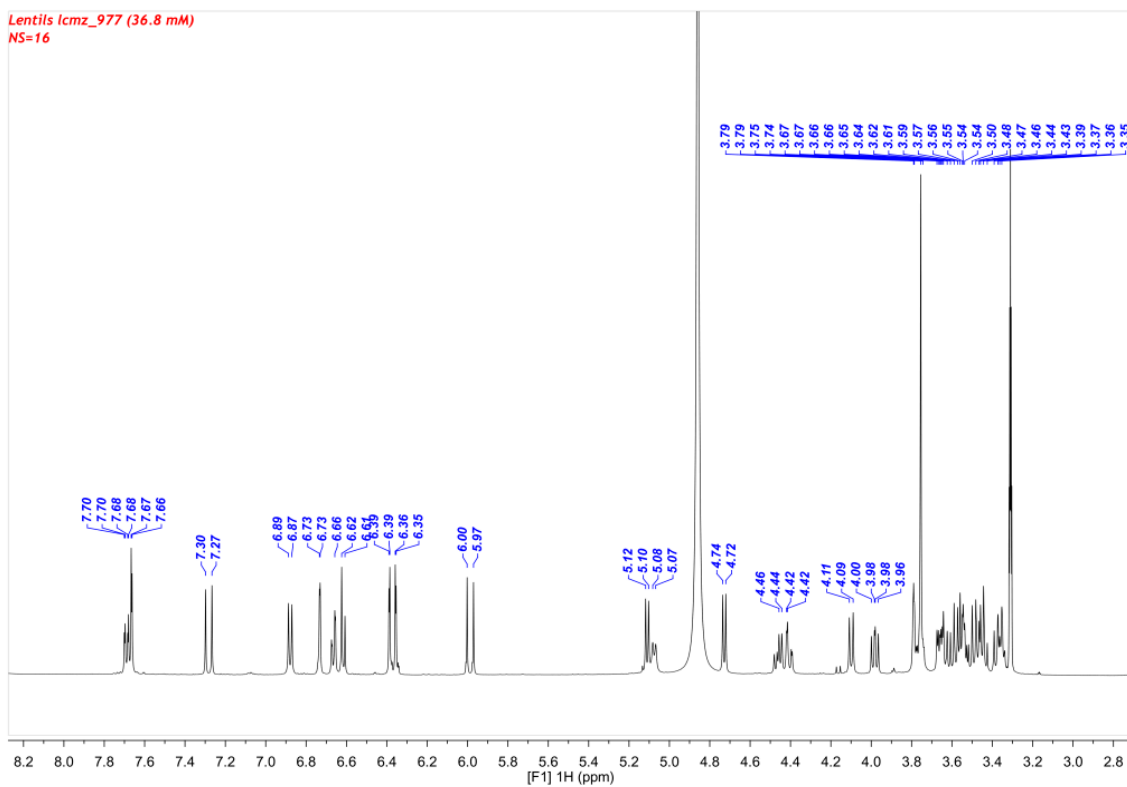

**Figure S77.** 1D  $^{13}\text{C}$ -NMR spectra (1H decoupled and DEPT-135) of compound **8** (methanol- $d_4$ , 125.77 MHz).

$^{13}\text{C}$  decoupled  
NS=4096

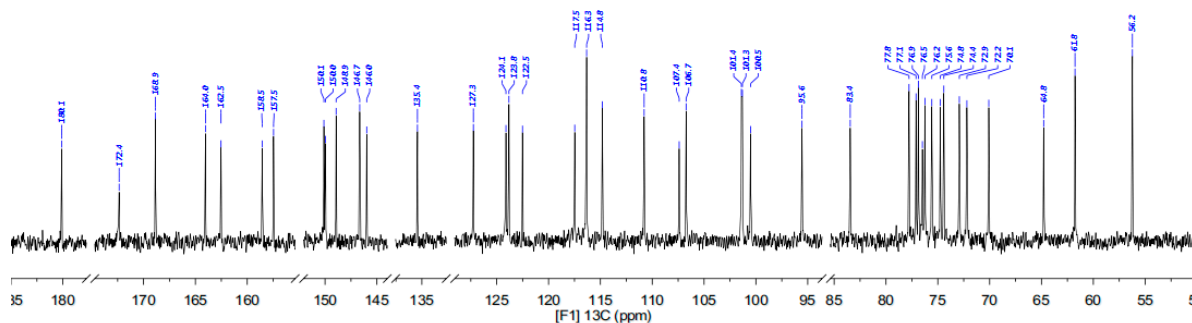

$^{13}\text{C}$  DEPT  
NS=1024

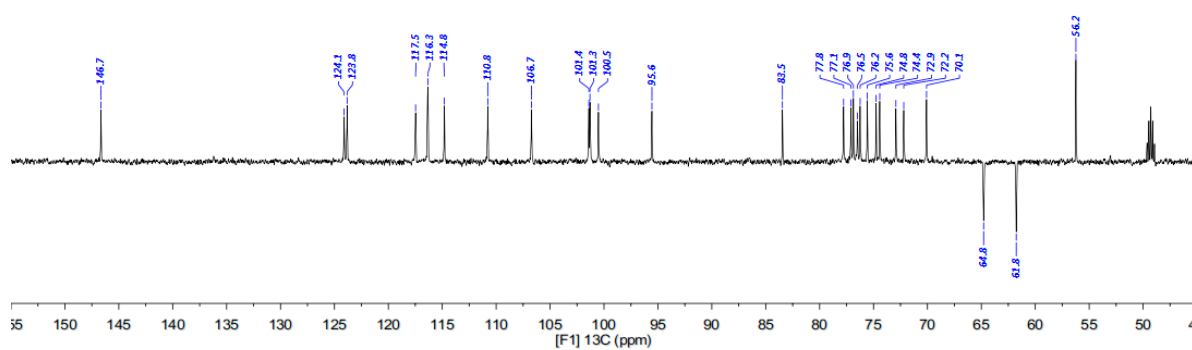

**Figure S78.** 2D g-COSY NMR spectrum of compound **8** (methanol- $d_4$ , 500.18 MHz).

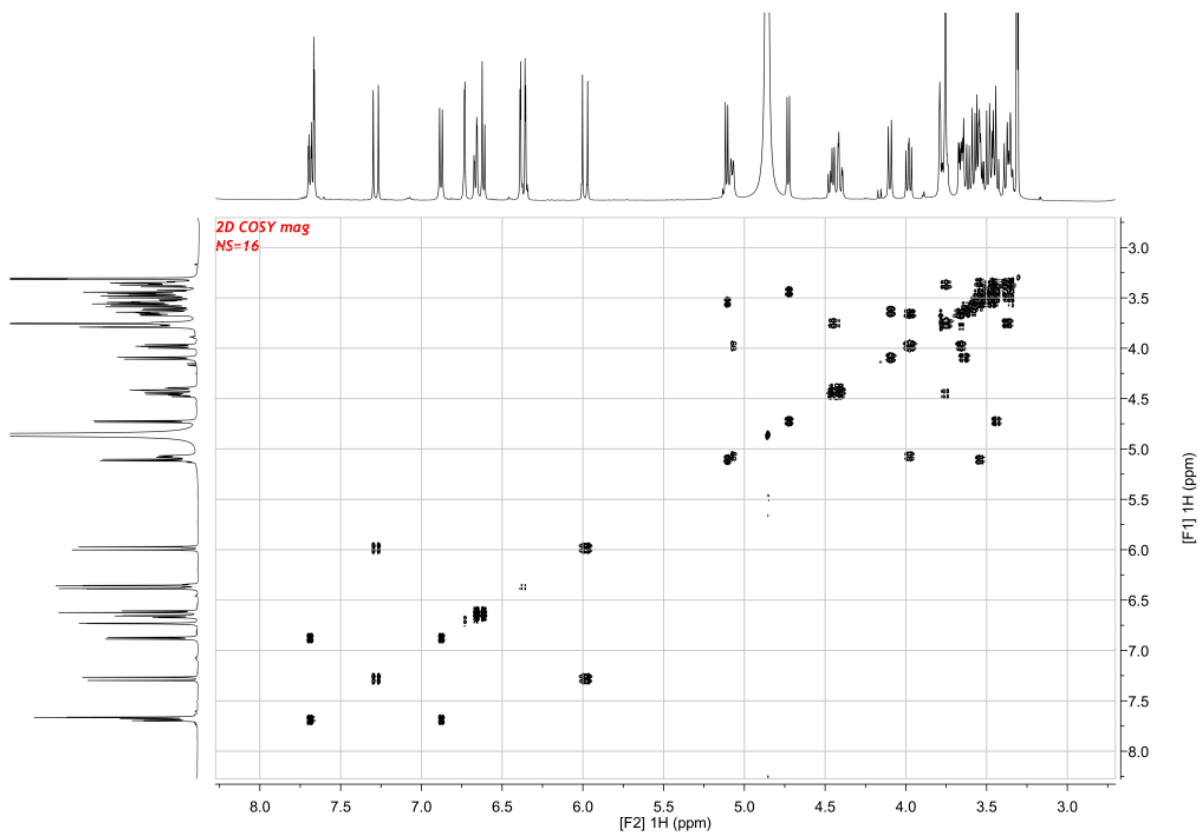

**Figure S79.** 2D TOCSY NMR spectrum of compound **8** (methanol- $d_4$ , 500.18 MHz).

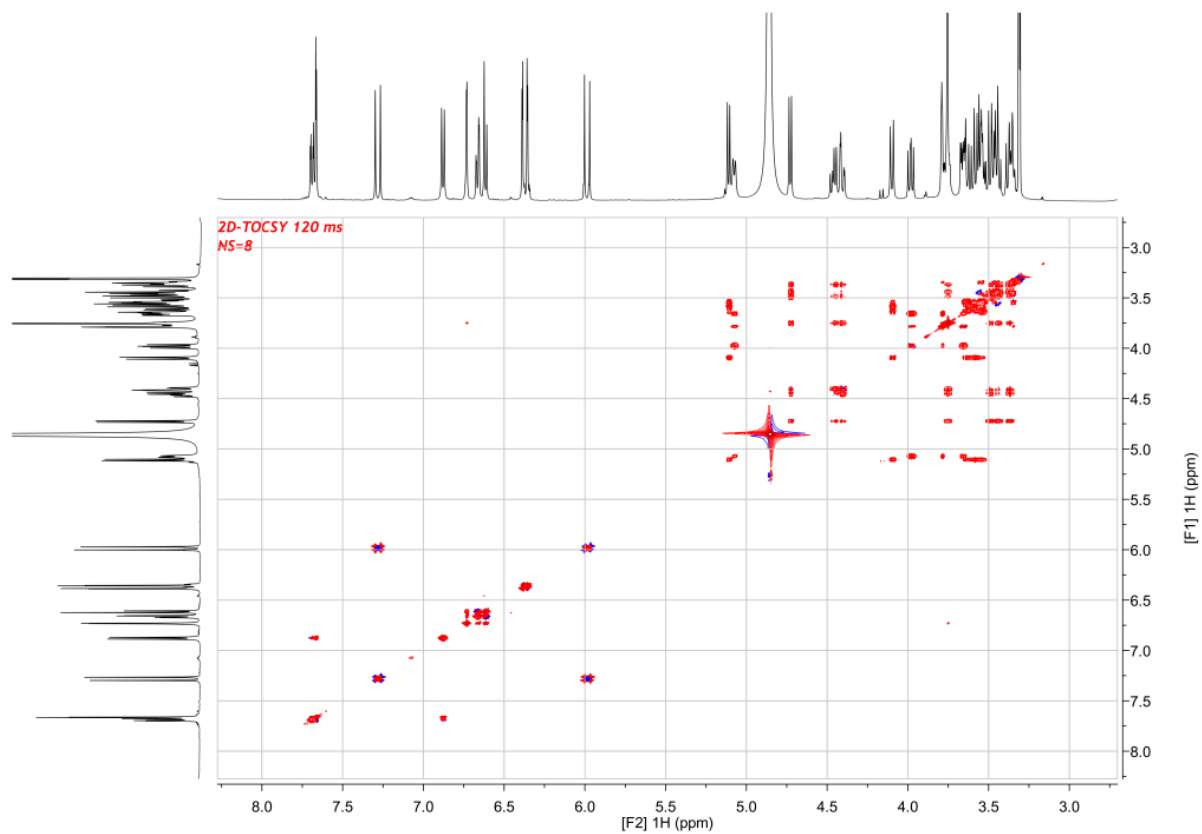

**Figure S80.** 2D ROESY NMR spectrum of compound **8** (methanol- $d_4$ , 500.18 MHz).

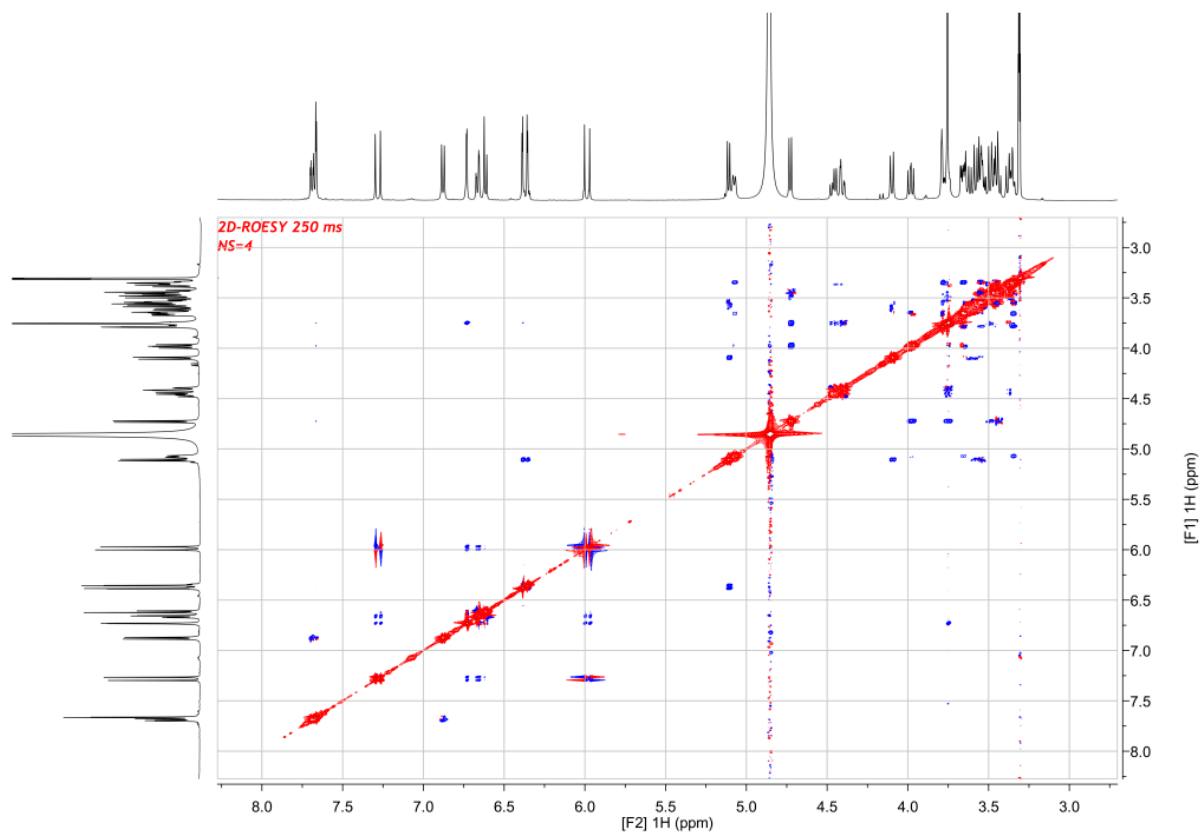

**Figure S81.** 2D *g*-HSQC-NMR spectrum of compound **8** (methanol-*d*<sub>4</sub>, 500.18 MHz, 125.77 MHz).

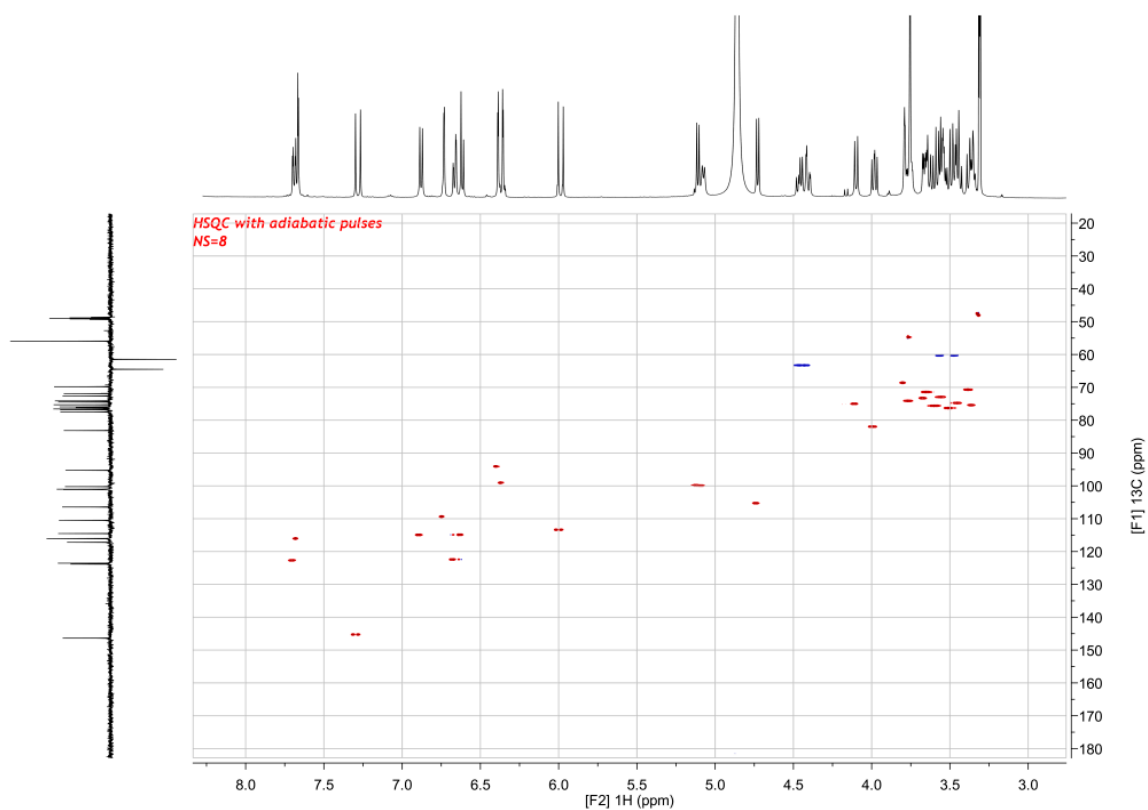

**Figure S82.** 2D *g*-HSQC-TOCSY NMR spectrum of compound **8** (methanol-*d*<sub>4</sub>, 500.18 MHz, 125.77 MHz).

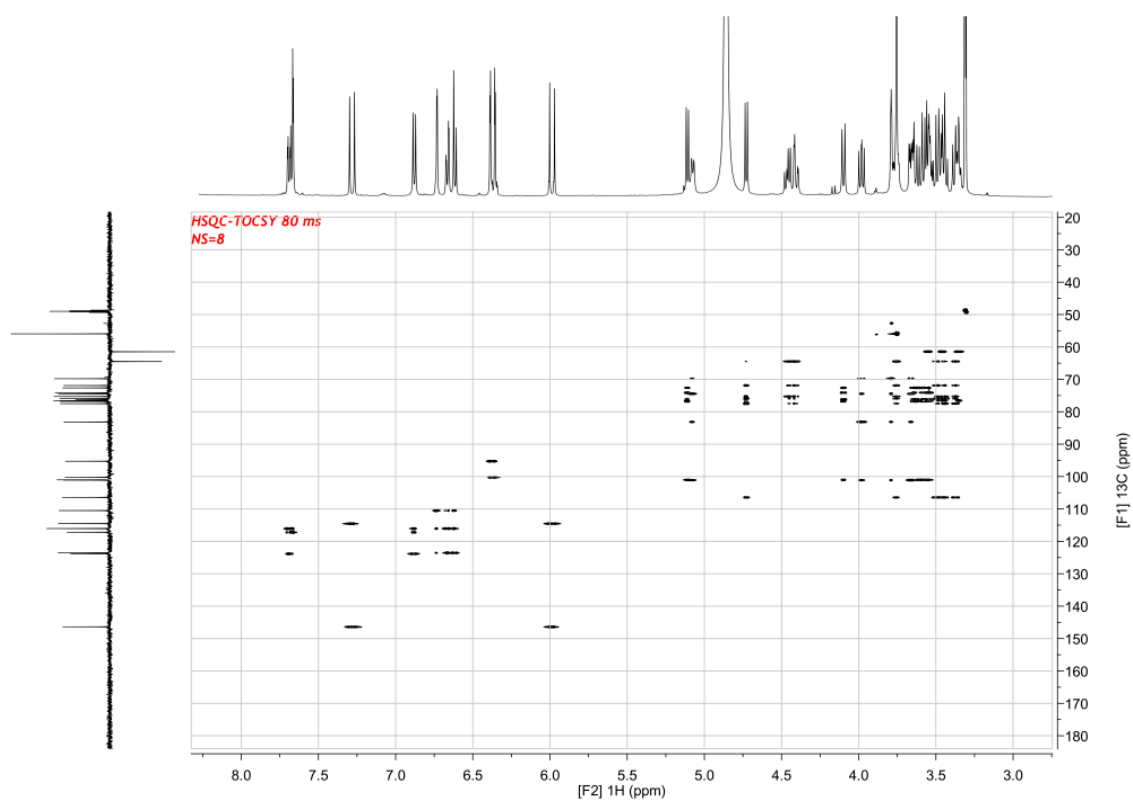

**Figure S83.** 2D g-HMBC-NMR spectrum of compound **8** (methanol-*d*<sub>4</sub>, 500.18 MHz, 125.77 MHz).

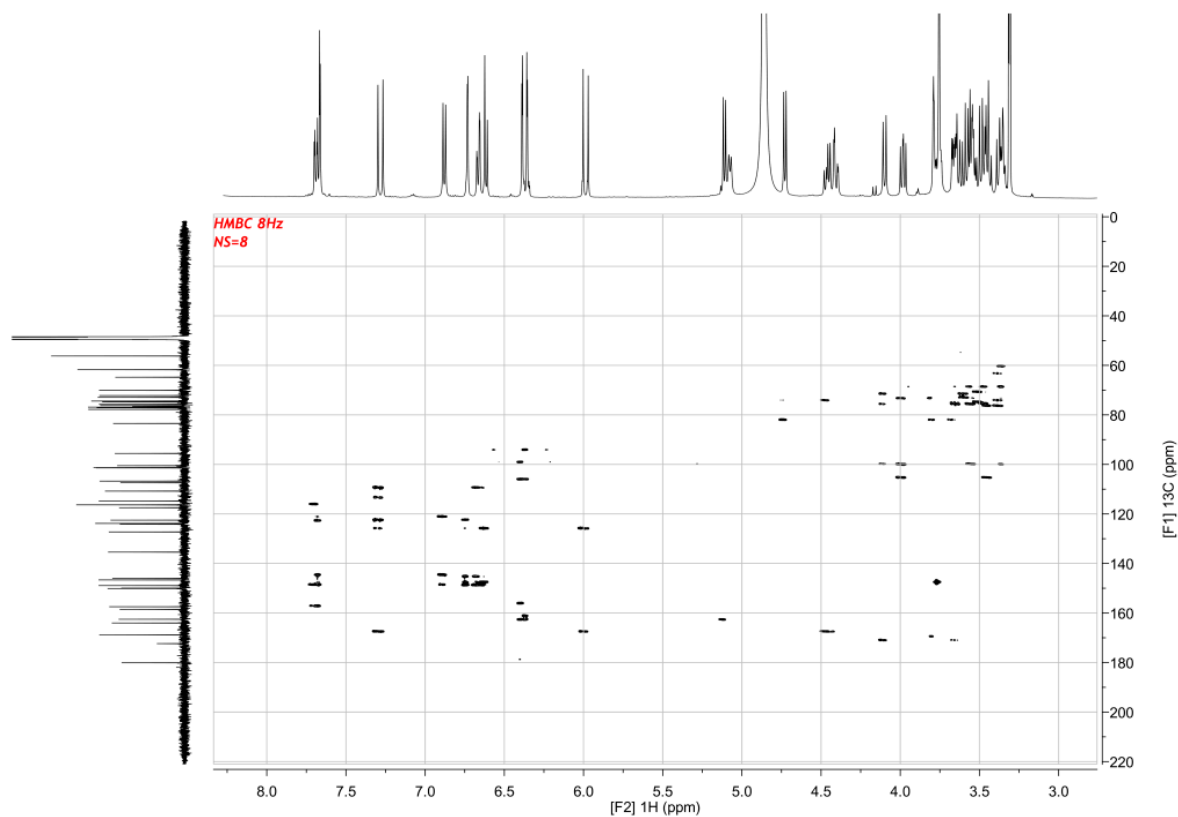

**Figure S84.** 1D TOCSY and 1D ROESY NMR subspectra of H-1(*7-O-β*-GlcA) in compound **8** (methanol-*d*<sub>4</sub>, 500.18 MHz).

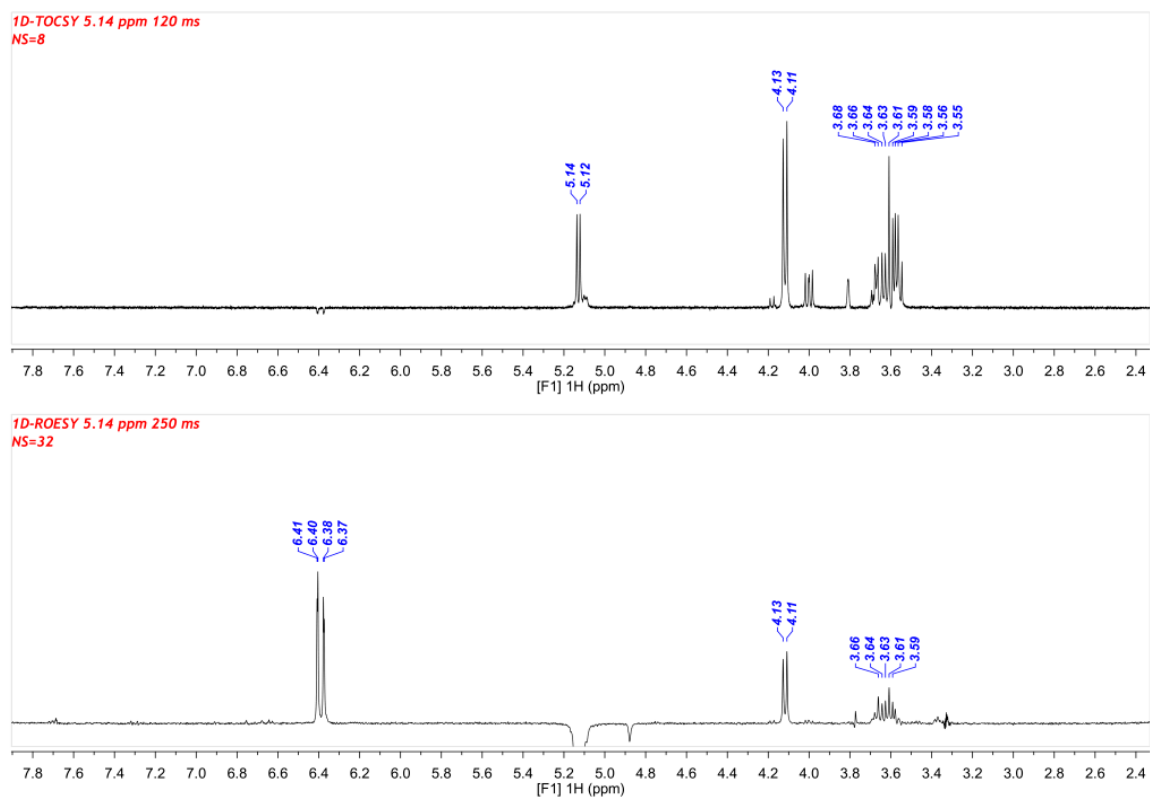



**Figure S85.** 1D TOCSY and 1D ROESY NMR subspectra of H-1(<sub>3</sub>-O-β-Gal) in compound **8** (methanol-*d*<sub>4</sub>, 500.18 MHz).

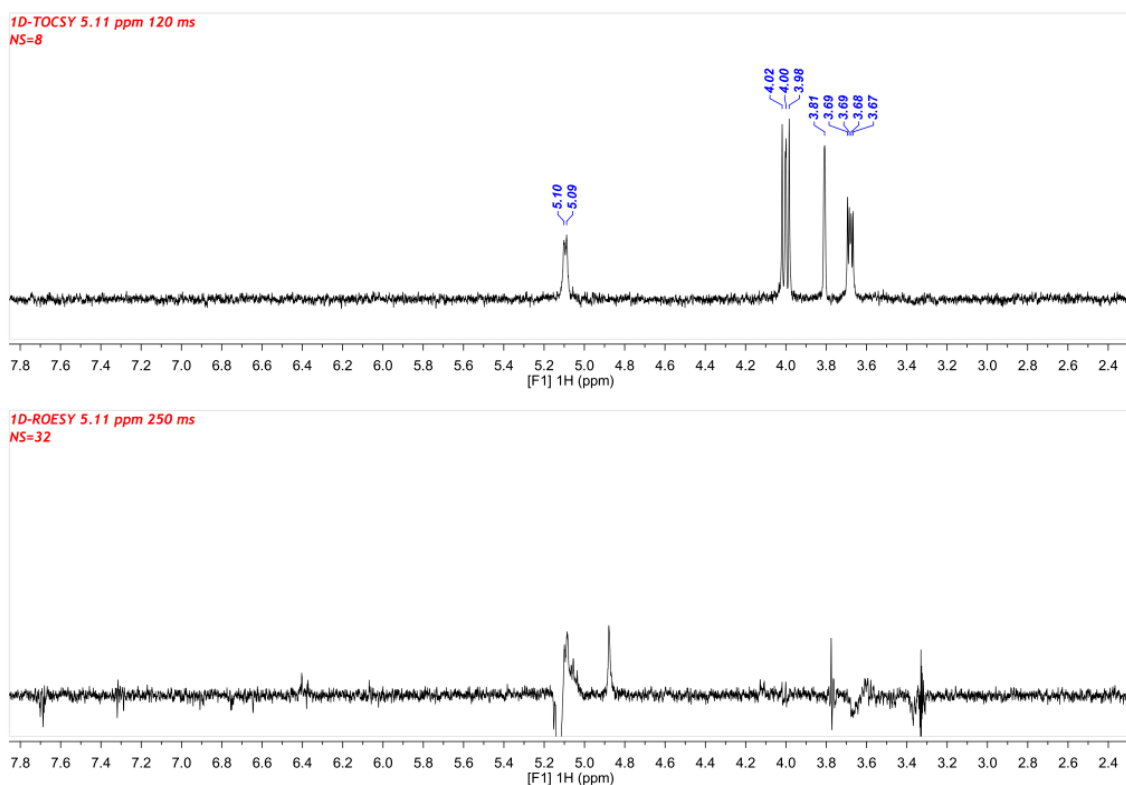

**Figure S86.** 1D TOCSY and 1D ROESY NMR subspectra of H-1(<sub>2</sub>-Gal-O-β-Glc) in compound **8** (methanol-*d*<sub>4</sub>, 500.18 MHz).

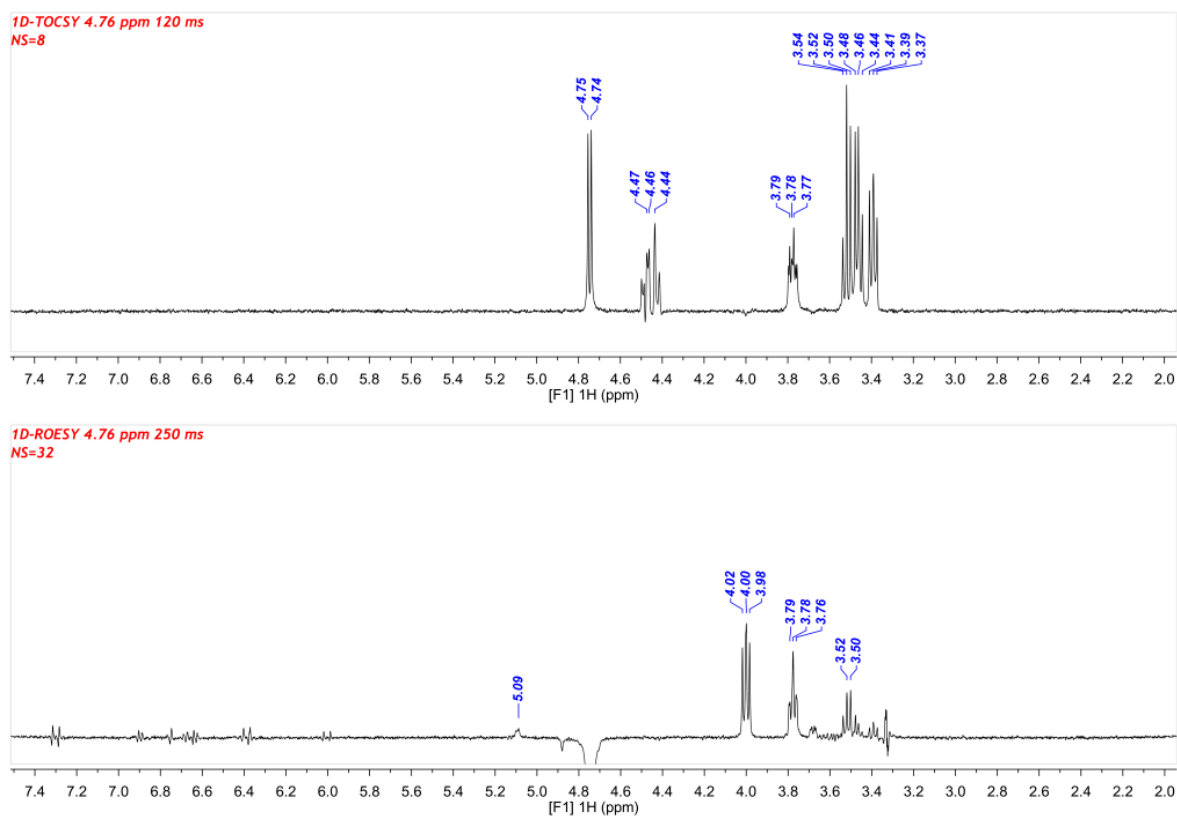

## Compound 9

Figure S87. 1D  $^1\text{H}$ -NMR spectrum of compound 9 (methanol- $d_4$ , 500.18 MHz).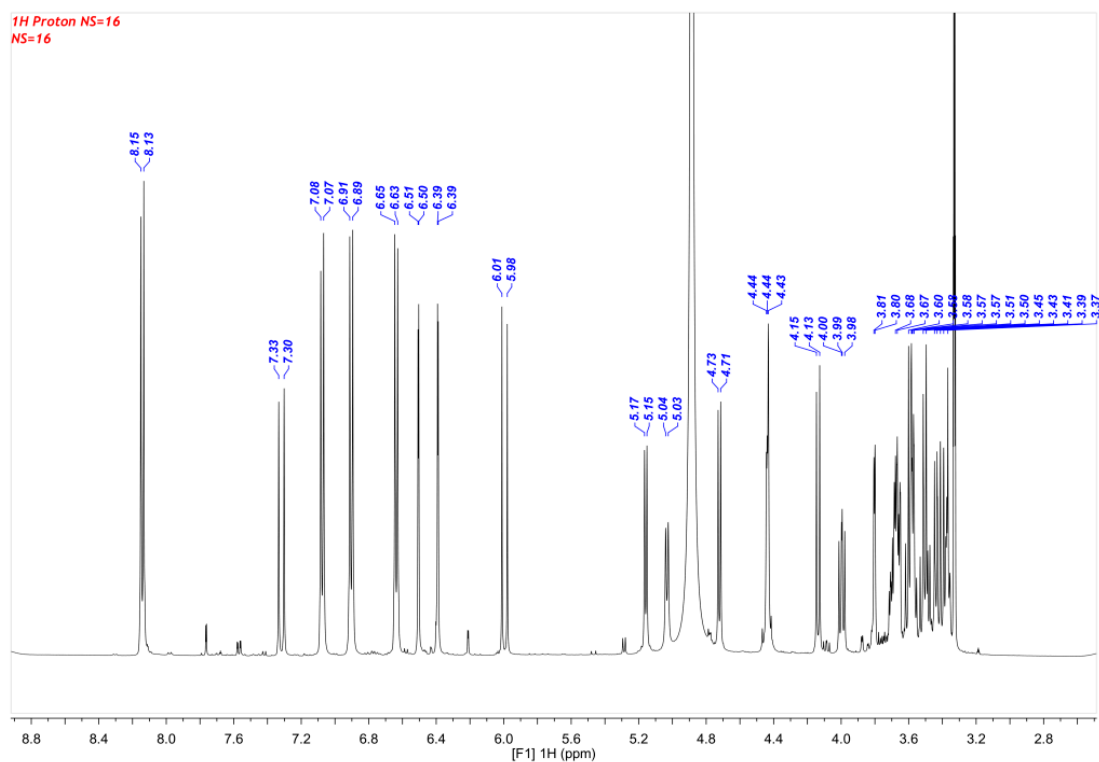Figure S88. 1D  $^{13}\text{C}$ -NMR spectra (1H decoupled and DEPT-135) of compound 9 (methanol- $d_4$ , 125.77 MHz).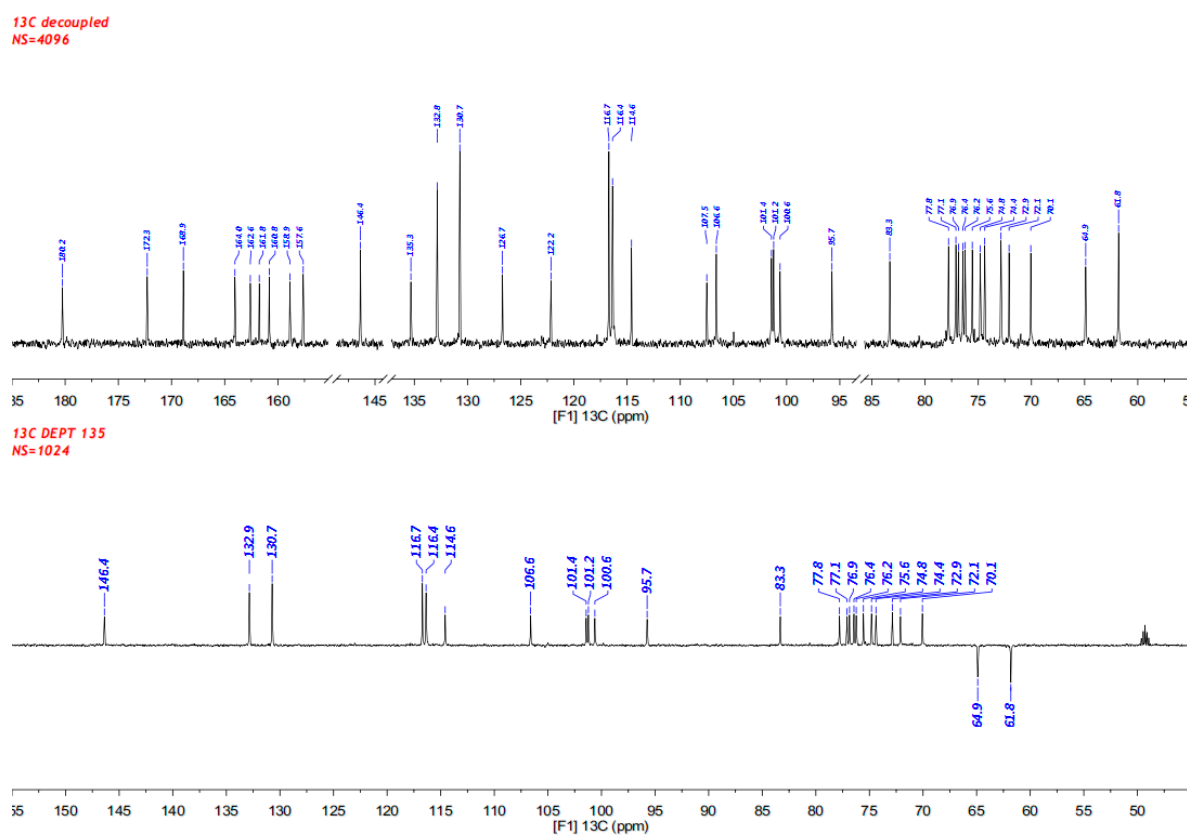

**Figure S89.** 2D g-COSY NMR spectrum of compound **9** (methanol-*d*<sub>4</sub>, 500.18 MHz).

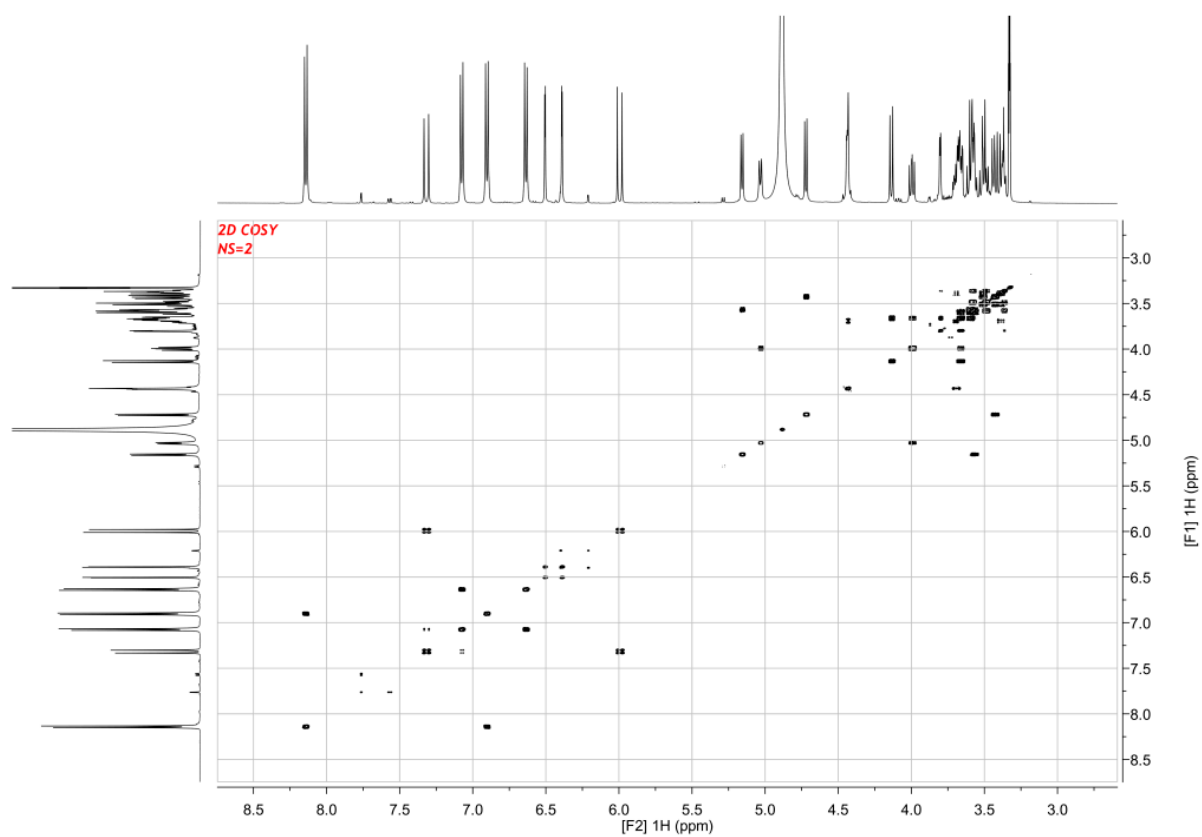

**Figure S90.** 2D TOCSY NMR spectrum of compound **9** (methanol-*d*<sub>4</sub>, 500.18 MHz).

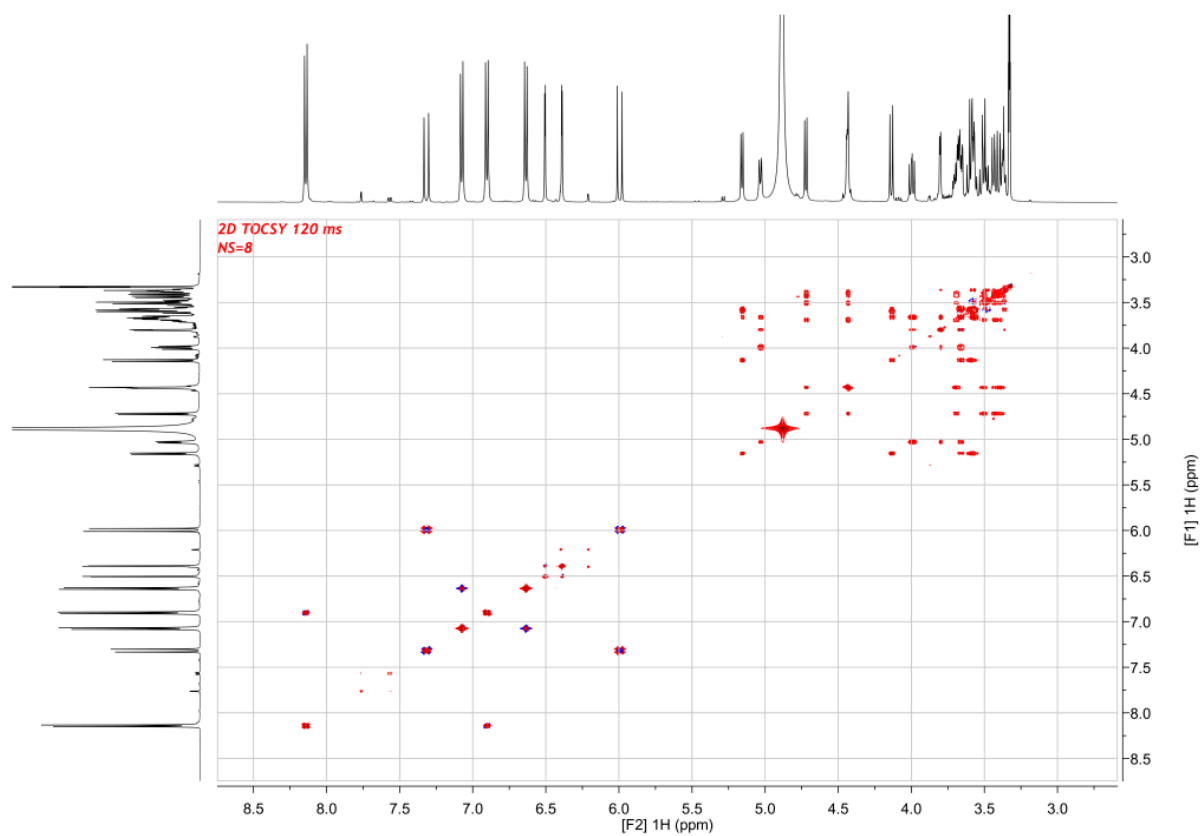

**Figure S91.** 2D ROESY NMR spectrum of compound **9** (methanol- $d_4$ , 500.18 MHz).

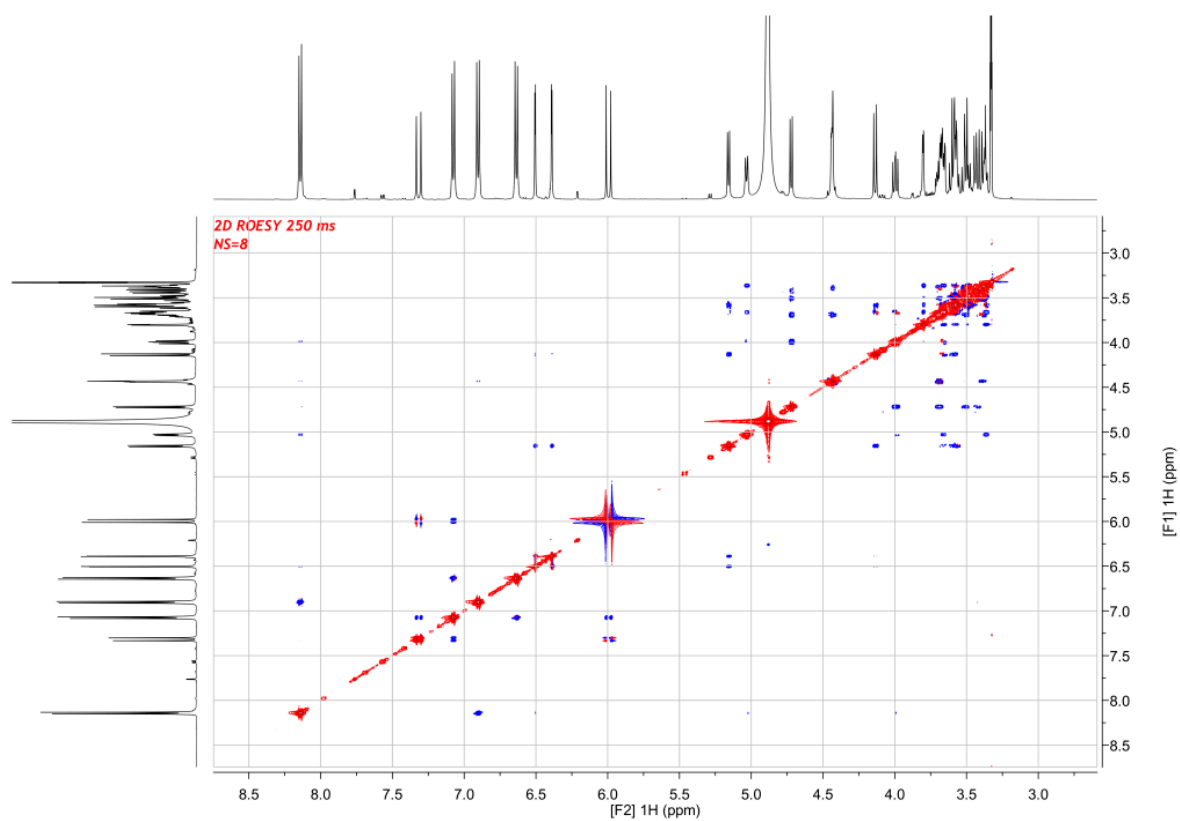

**Figure S92.** 2D  $g$ -HSQC-NMR spectrum of compound **9** (methanol- $d_4$ , 500.18 MHz, 125.77 MHz).

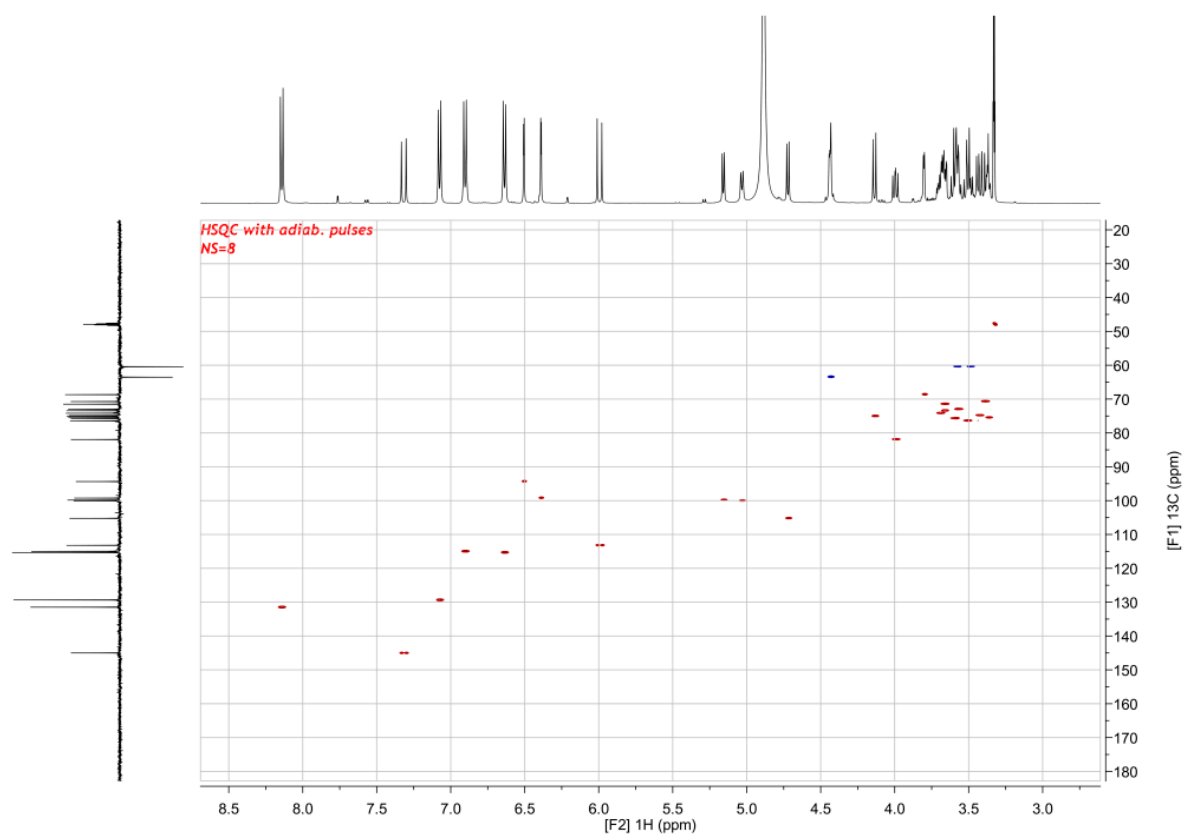

**Figure S93.** 2D g-HSQC-TOCSY NMR spectrum of compound **9** (methanol- $d_4$ , 500.18 MHz, 125.77 MHz).

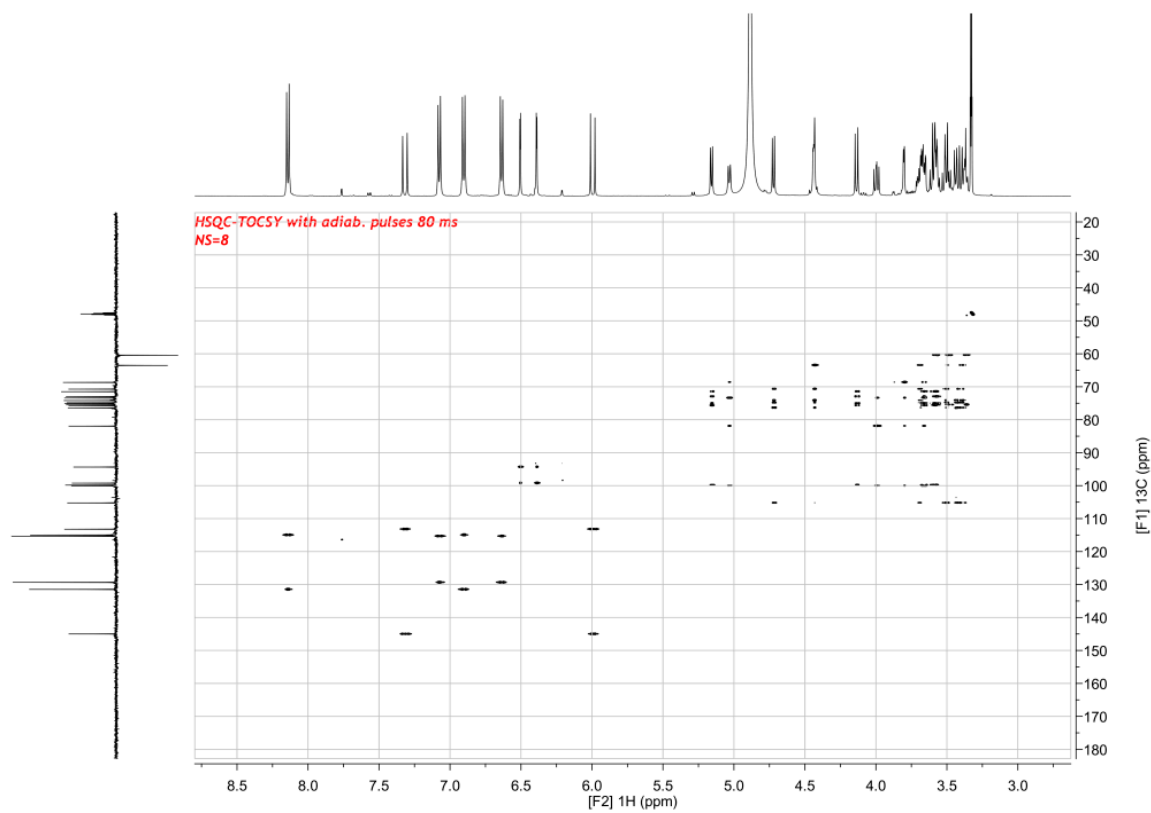

**Figure S94.** 2D g-HMBC-NMR spectrum of compound **9** (methanol- $d_4$ , 500.18 MHz, 125.77 MHz).

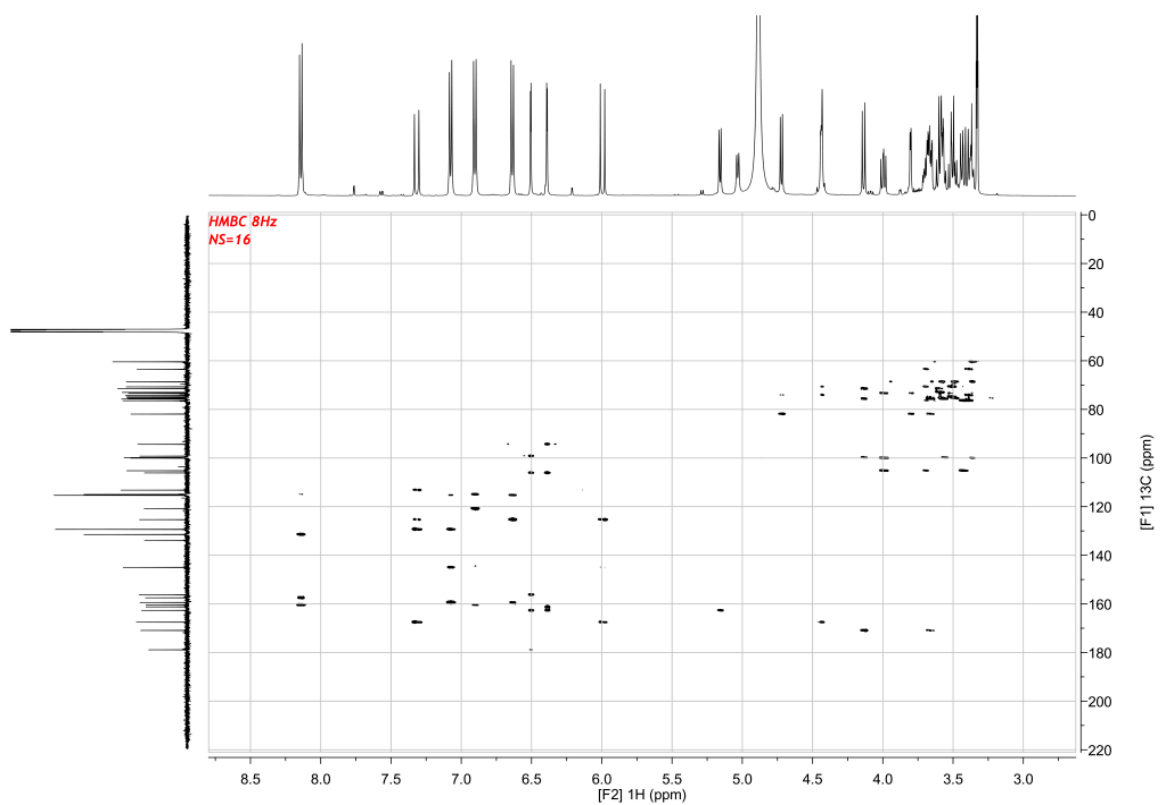

**Figure S95.** 1D TOCSY and 1D ROESY NMR subspectra of H-1(*7-O*- $\beta$ -GlcA) in compound **9** (methanol-*d*<sub>4</sub>, 500.18 MHz).

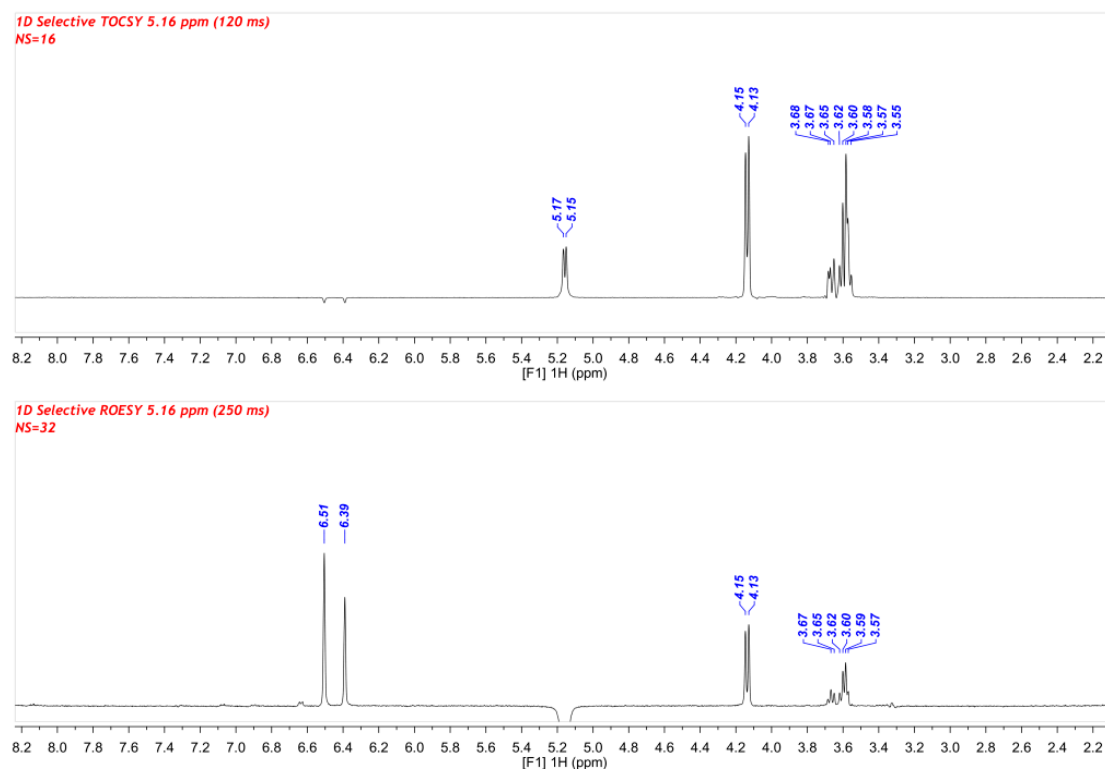

**Figure S96.** 1D TOCSY and 1D ROESY NMR subspectra of H-1(*3-O*- $\beta$ -Gal) in compound **9** (methanol-*d*<sub>4</sub>, 500.18 MHz).

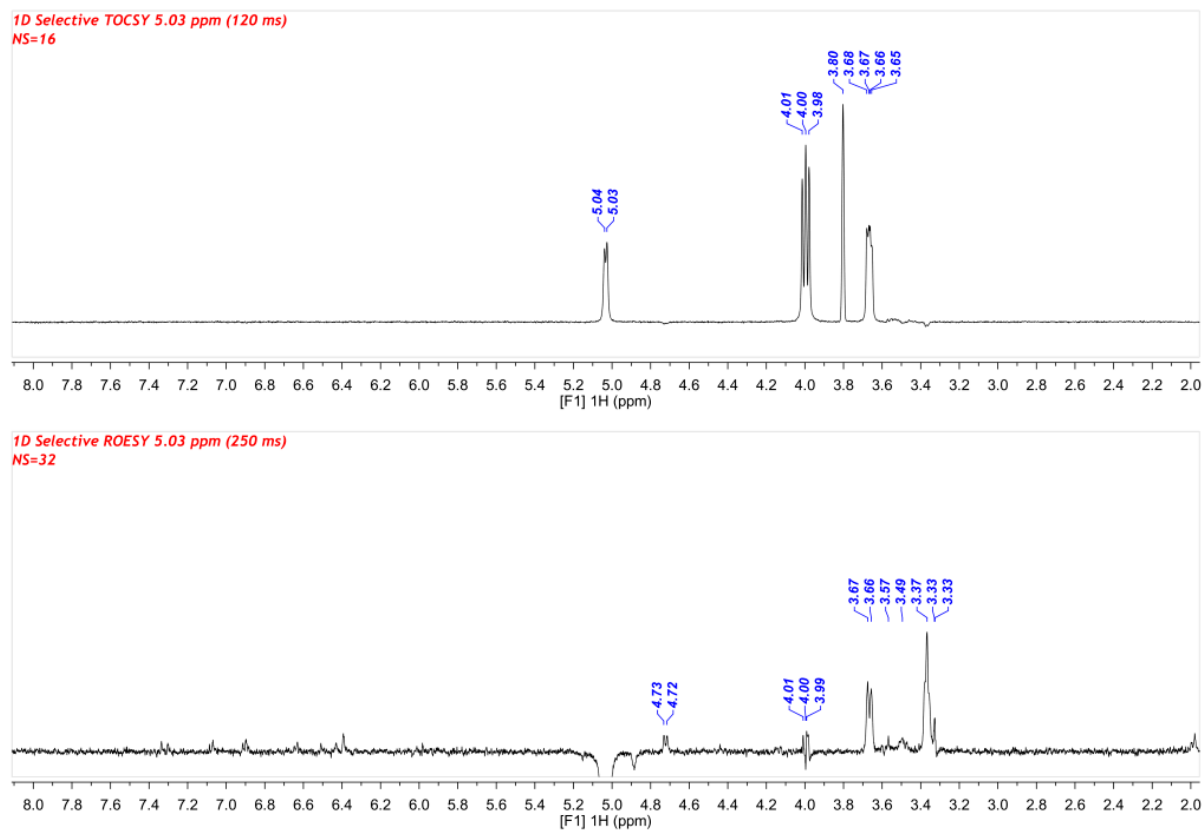

**Figure S97.** 1D TOCSY and 1D ROESY NMR subspectra of H-1(<sub>2</sub>Gal-O-β-Glc) in compound **9** (methanol-*d*<sub>4</sub>, 500.18 MHz).

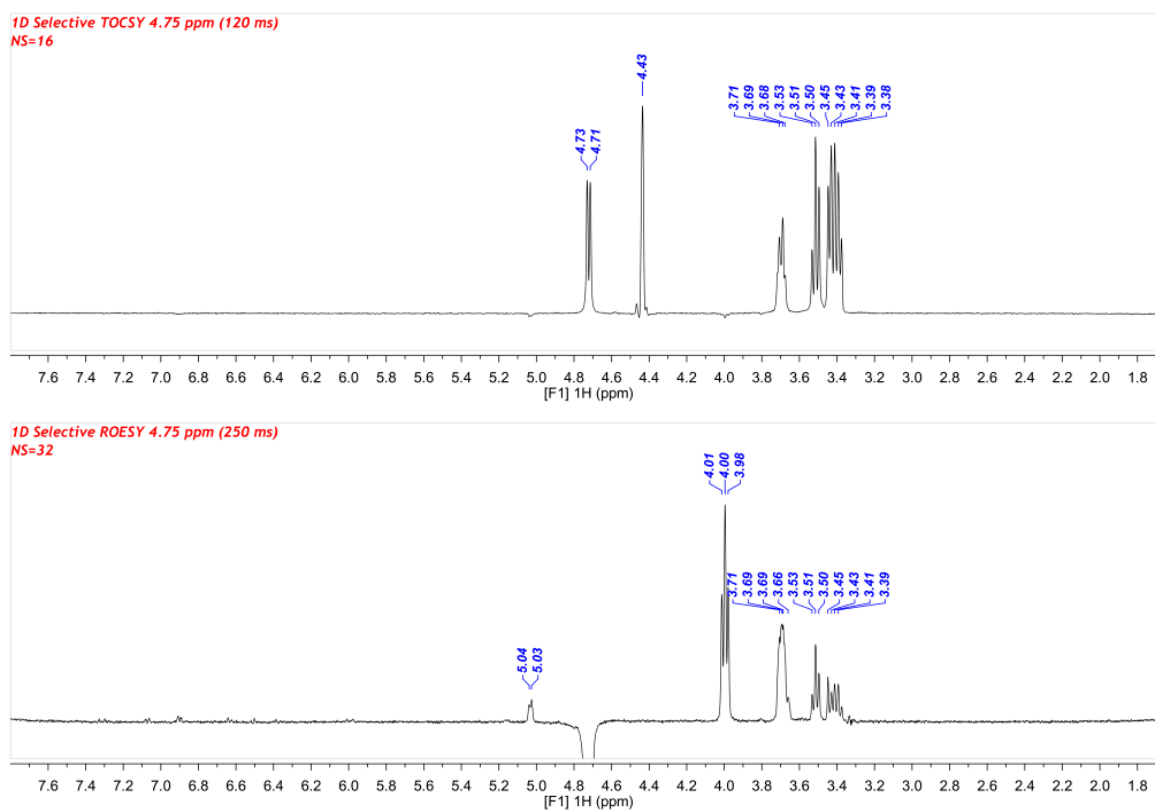

## Compound 10

**Figure S98.** 1D <sup>1</sup>H-NMR spectrum of compound **10** (methanol-*d*<sub>4</sub>, 500.18 MHz).

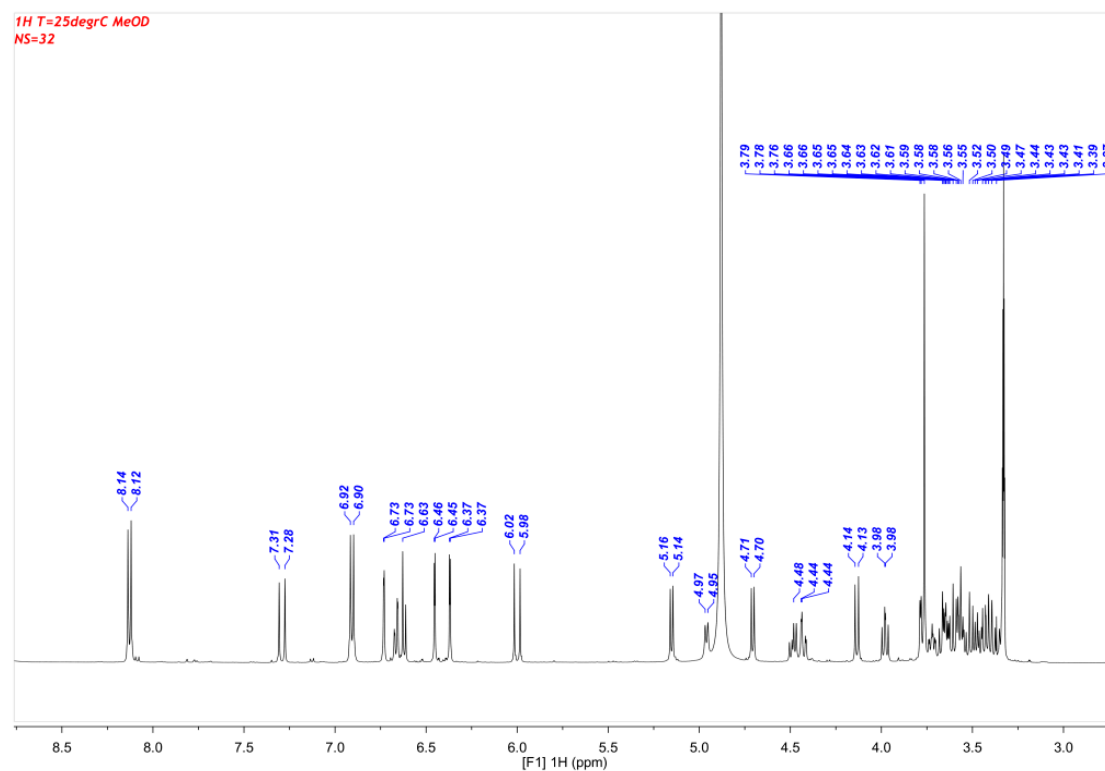

**Figure S99.** 1D  $^{13}\text{C}$ -NMR spectra ( $^1\text{H}$  decoupled and DEPT-135) of compound **10** (methanol- $d_4$ , 125.77 MHz).

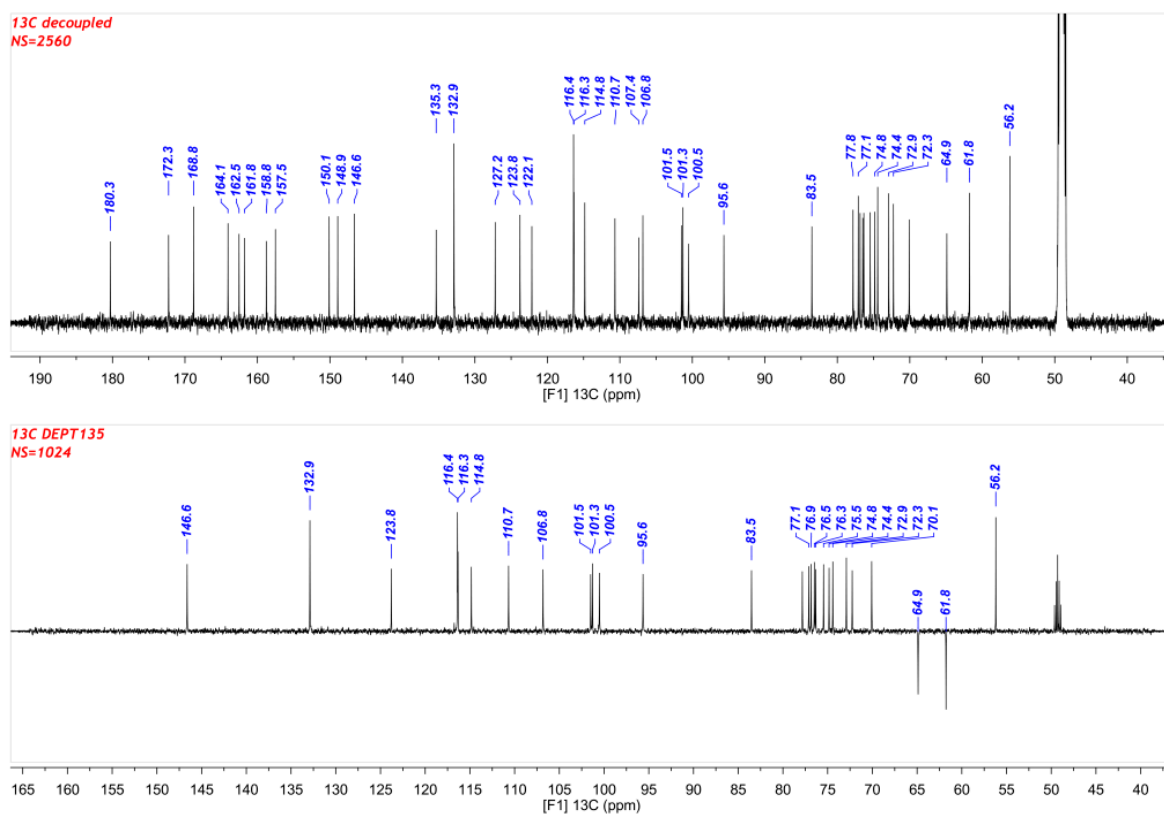

**Figure S100.** 2D  $g$ -COSY NMR spectrum of compound **10** (methanol- $d_4$ , 500.18 MHz).

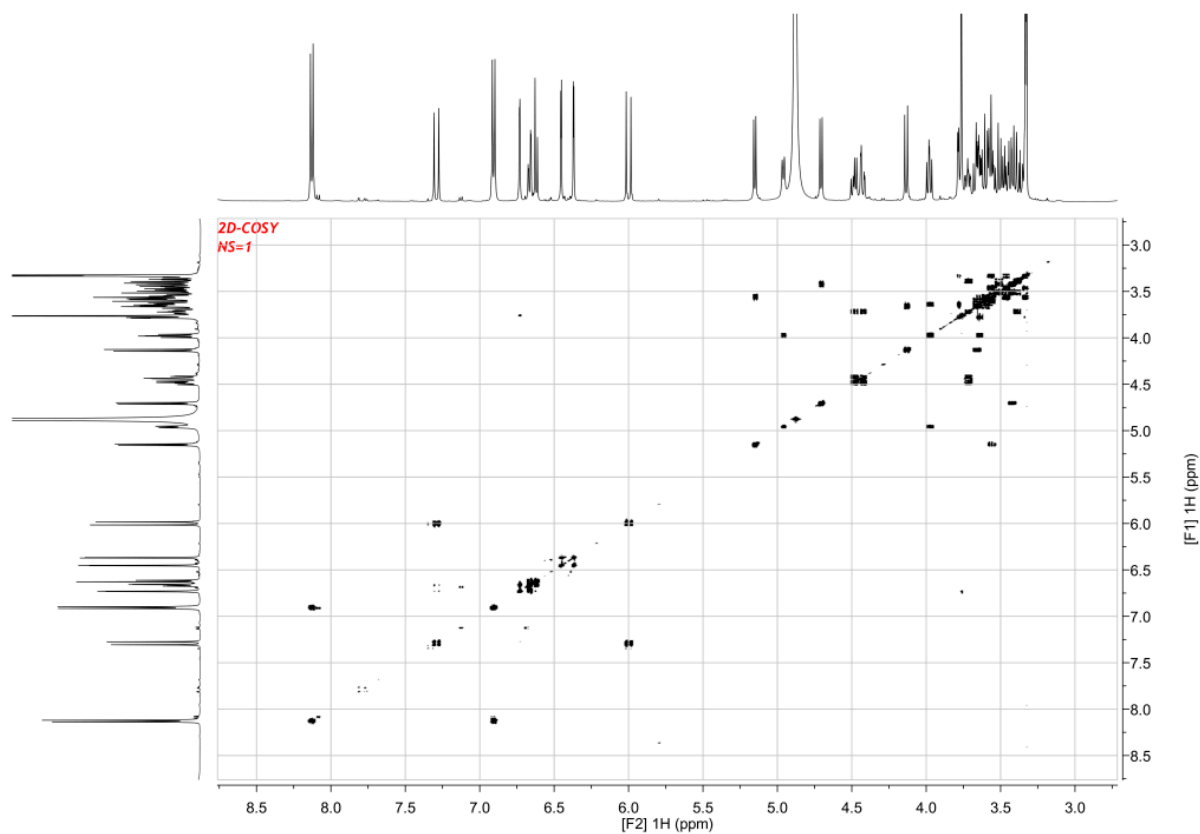



**Figure S101.** 2D TOCSY NMR spectrum of compound **10** (methanol-*d*<sub>4</sub>, 500.18 MHz).

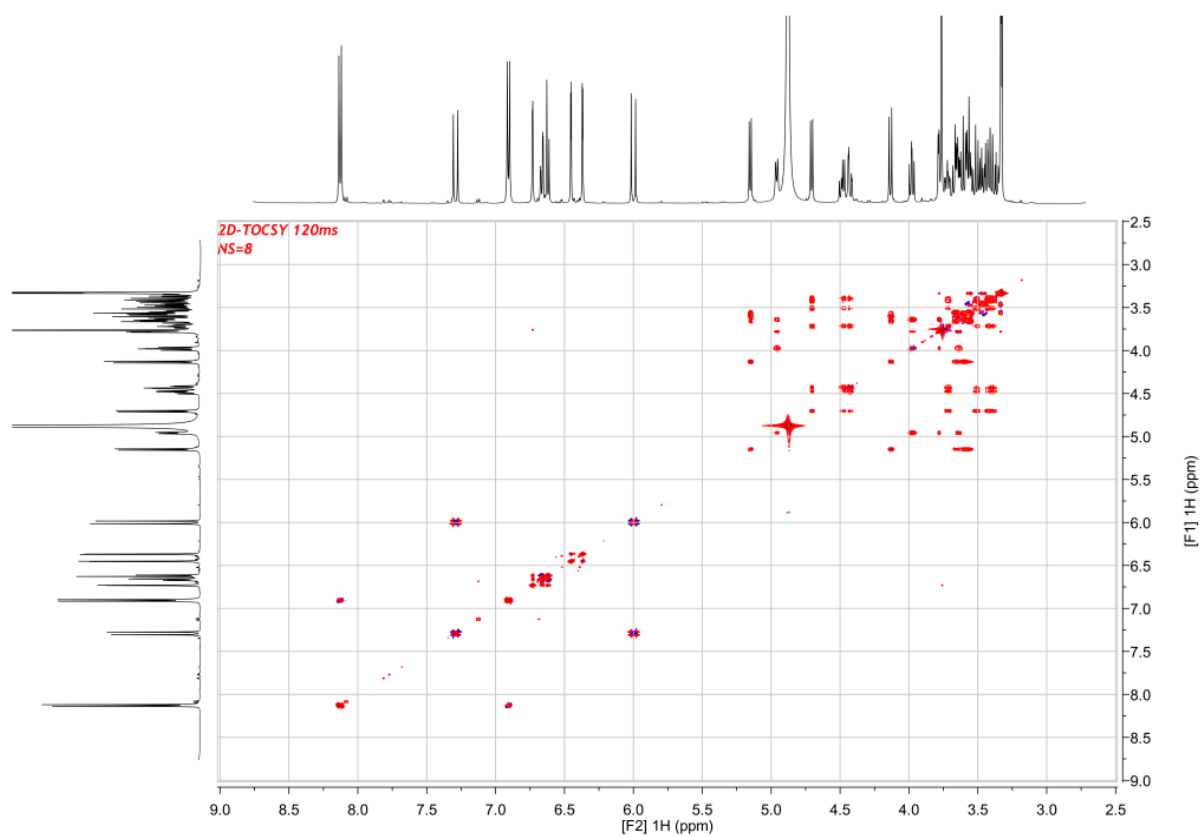

**Figure S102.** 2D ROESY NMR spectrum of compound **10** (methanol-*d*<sub>4</sub>, 500.18 MHz).

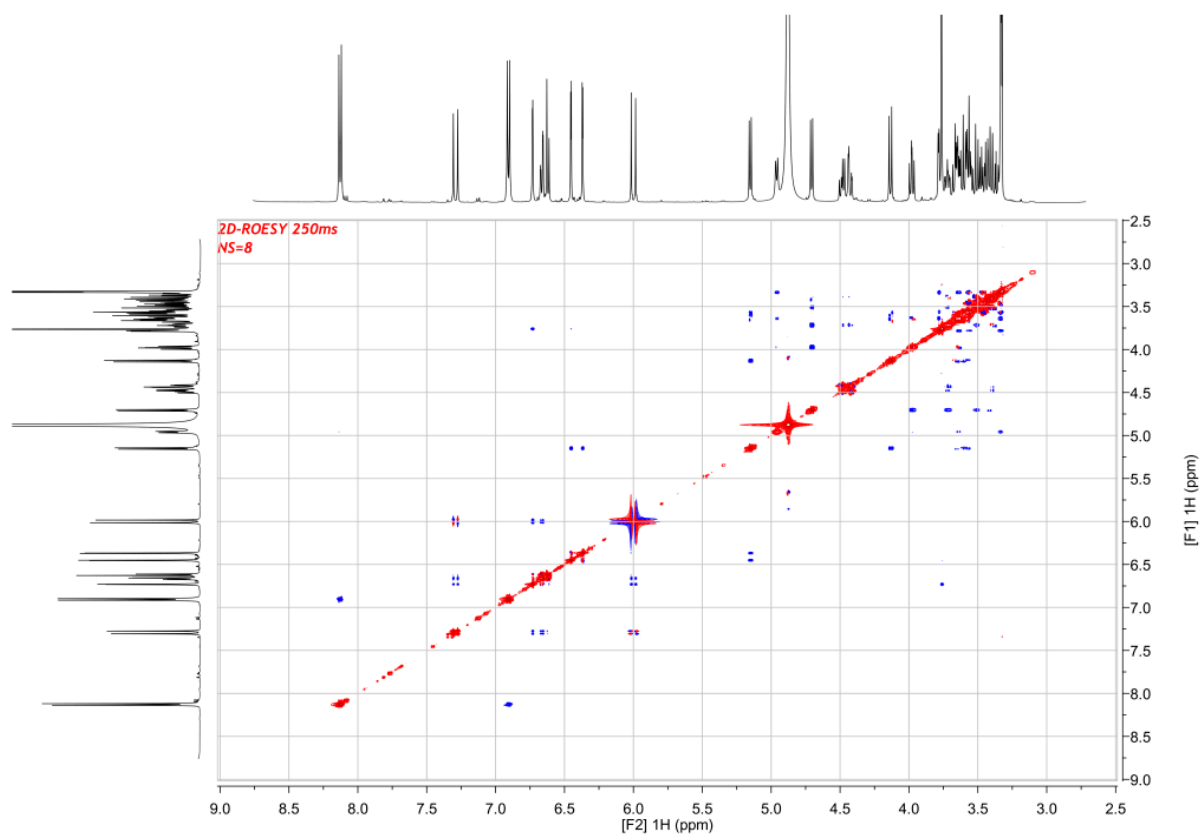

**Figure S103.** 2D *g*-HSQC-NMR spectrum of compound **10** (methanol-*d*<sub>4</sub>, 500.18 MHz, 125.77 MHz).

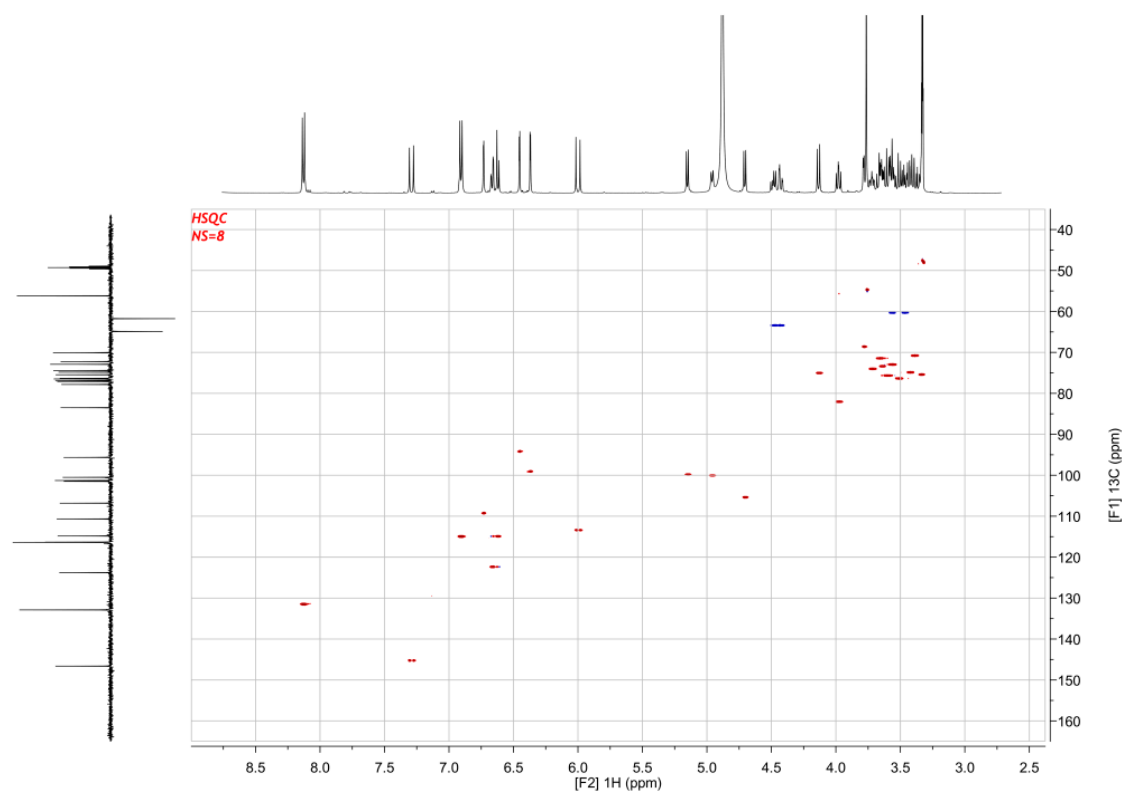

**Figure S104.** 2D *g*-HSQC-TOCSY NMR spectrum of compound **10** (methanol-*d*<sub>4</sub>, 500.18 MHz, 125.77 MHz).

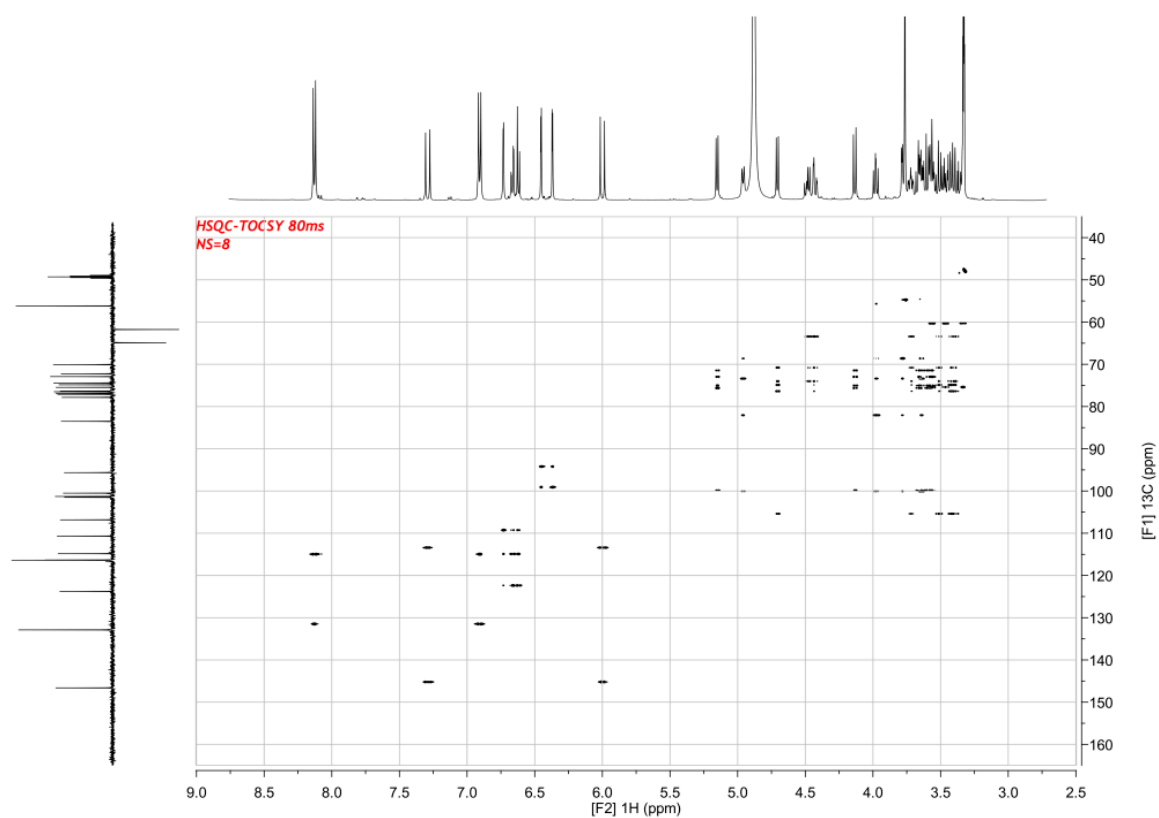

**Figure S105.** 2D g-HMBC-NMR spectrum of compound **10** (methanol- $d_4$ , 500.18 MHz, 125.77 MHz).

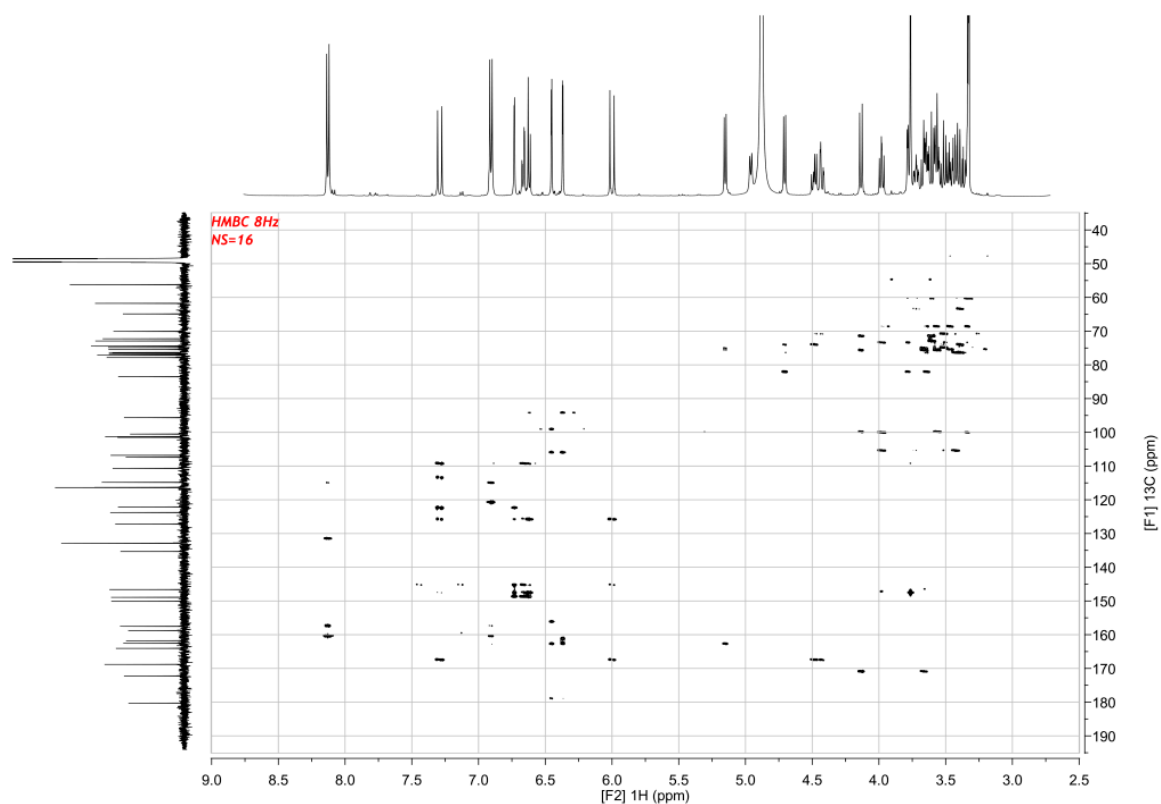

**Figure S106.** 1D TOCSY and 1D ROESY NMR subspectra of H-1( $7-O-\beta$ -GlcA) in compound **10** (methanol- $d_4$ , 500.18 MHz).

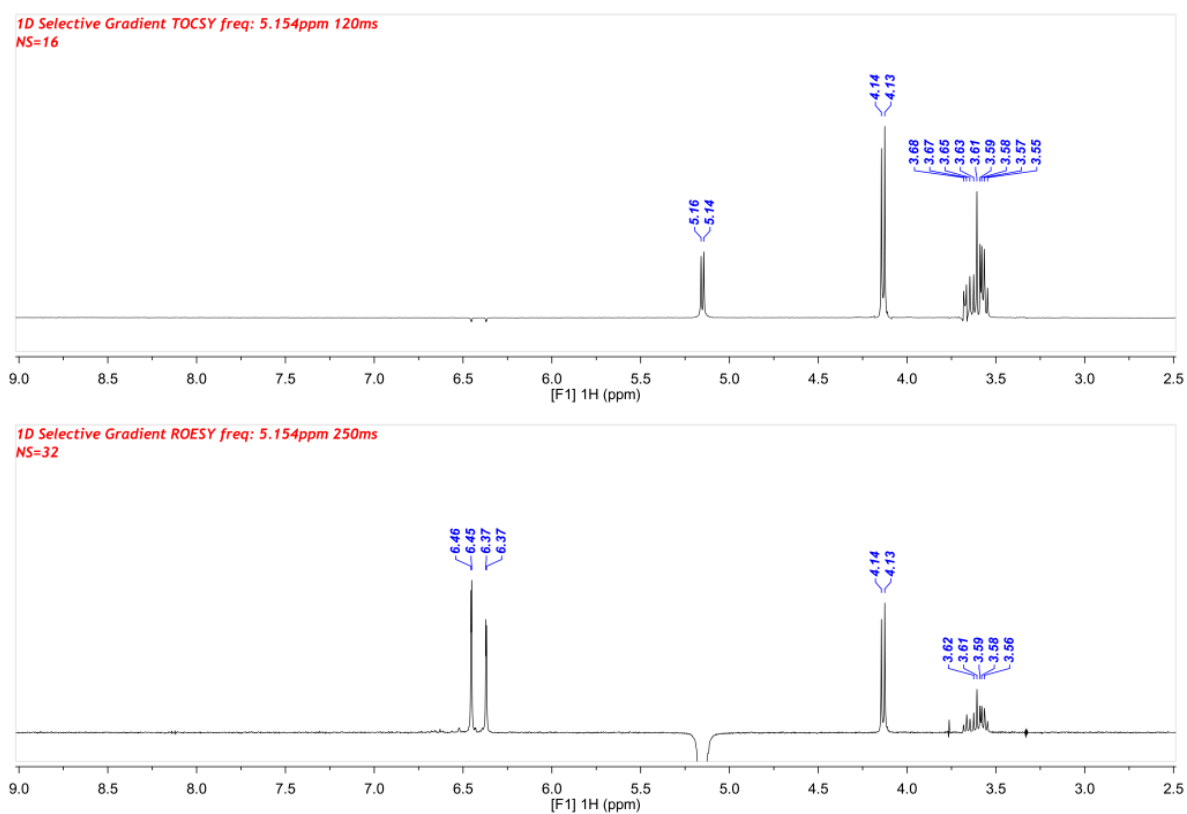

**Figure S107.** 1D TOCSY and 1D ROESY NMR subspectra of H-1(3-*O*- $\beta$ -Gal) in compound **10** (methanol-*d*<sub>4</sub>, 500.18 MHz).

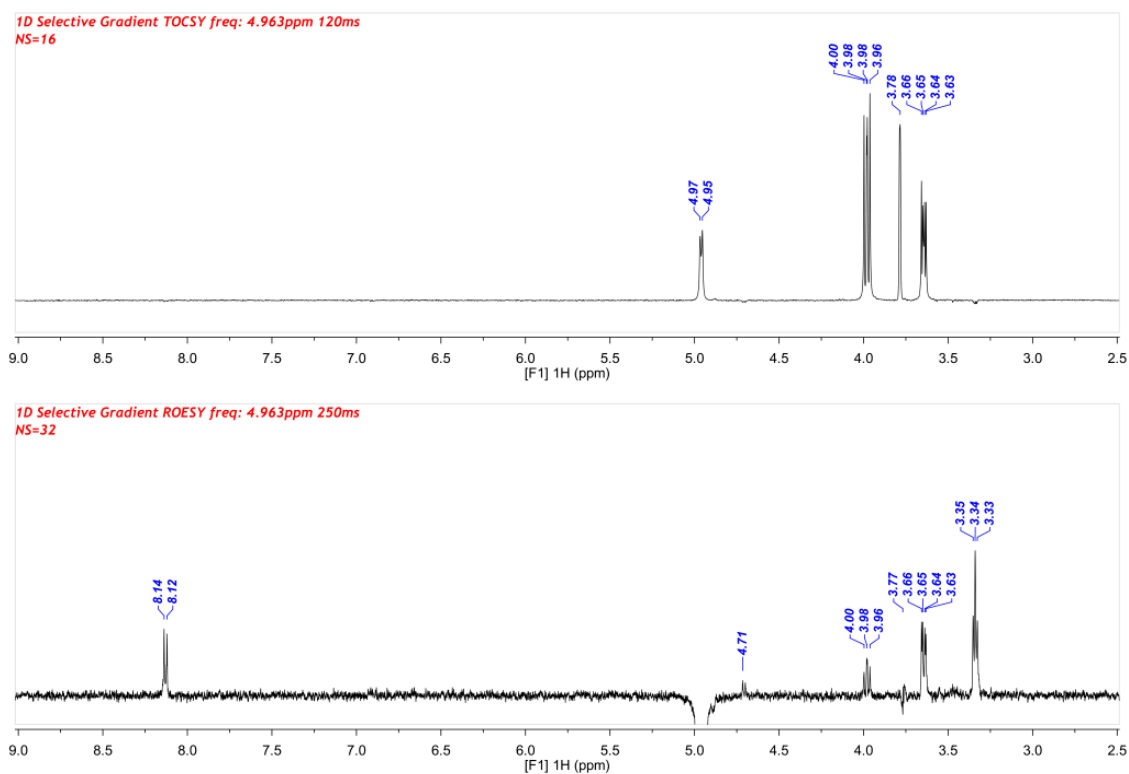

**Figure S108.** 1D TOCSY and 1D ROESY NMR subspectra of H-1(2<sup>Gal</sup>-*O*- $\beta$ -Glc) in compound **10** (methanol-*d*<sub>4</sub>, 500.18 MHz).

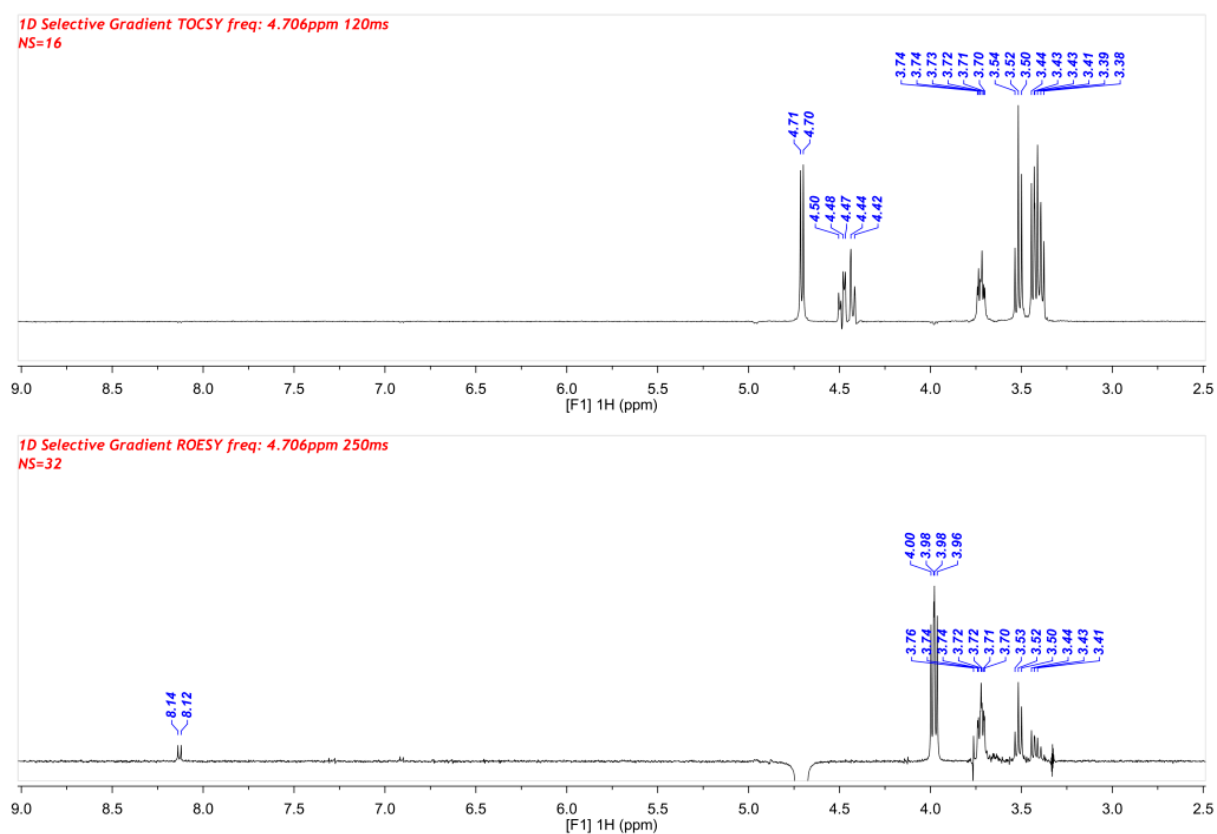

## Compound 11

Figure S109. 1D  $^1\text{H}$ -NMR spectrum of compound **11** (methanol- $d_4$ , 500.18 MHz).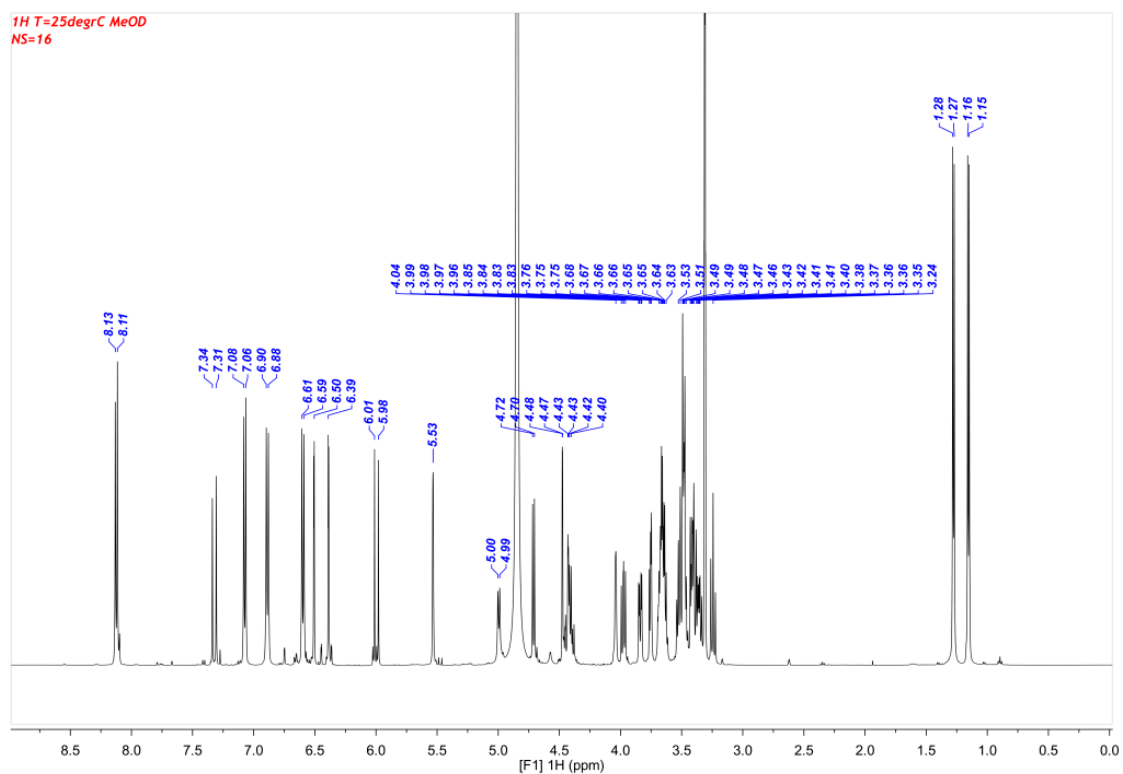Figure S110. 1D  $^{13}\text{C}$ -NMR spectra (1H decoupled and DEPT-135) of compound **11** (methanol- $d_4$ , 125.77 MHz).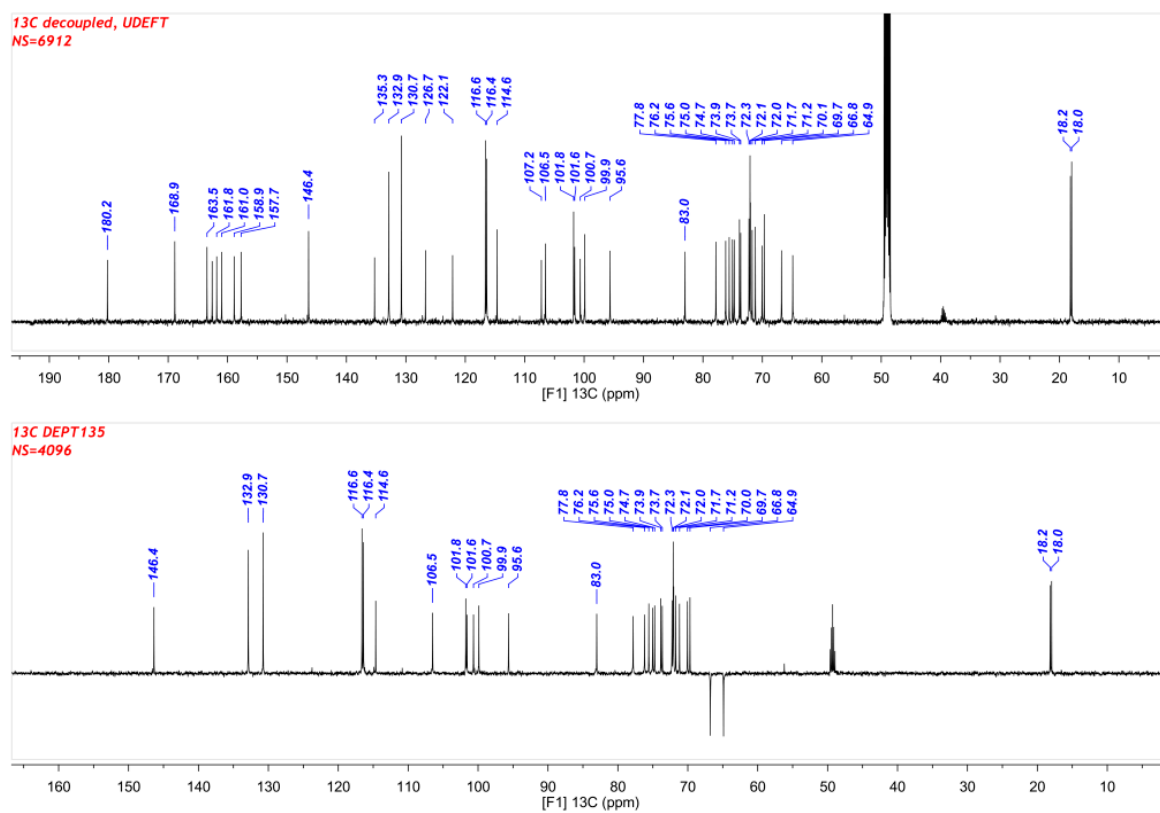

**Figure S111.** 2D g-COSY NMR spectrum of compound **11** (methanol-*d*<sub>4</sub>, 500.18 MHz).

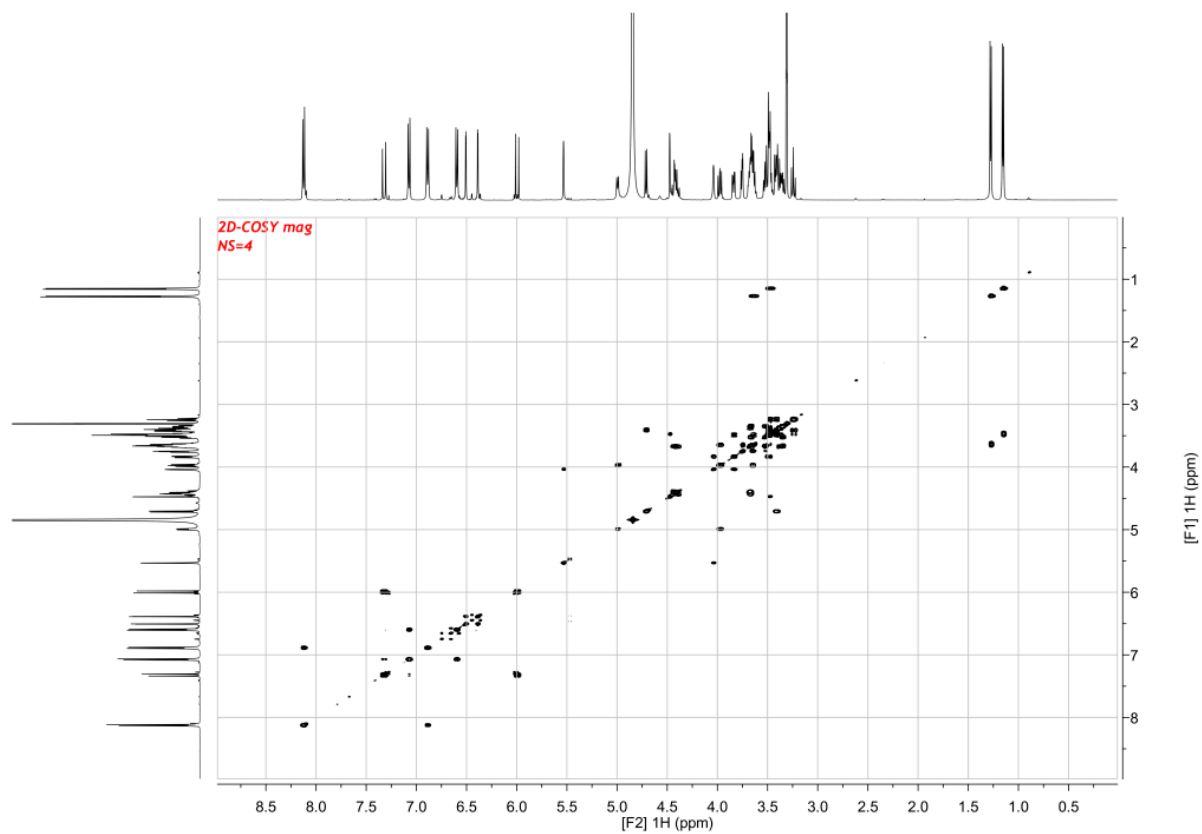

**Figure S112.** 2D TOCSY NMR spectrum of compound **11** (methanol-*d*<sub>4</sub>, 500.18 MHz).

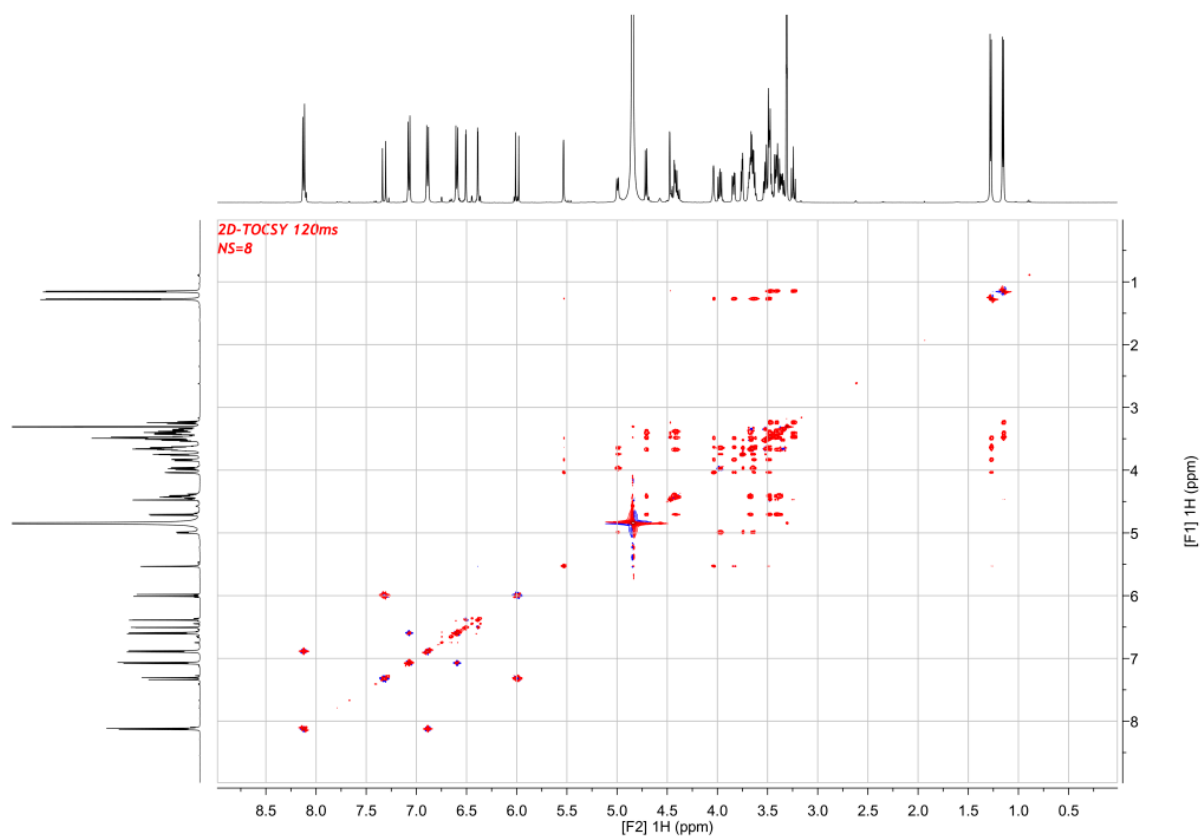

**Figure S113.** 2D ROESY NMR spectrum of compound **11** (methanol-*d*<sub>4</sub>, 500.18 MHz).

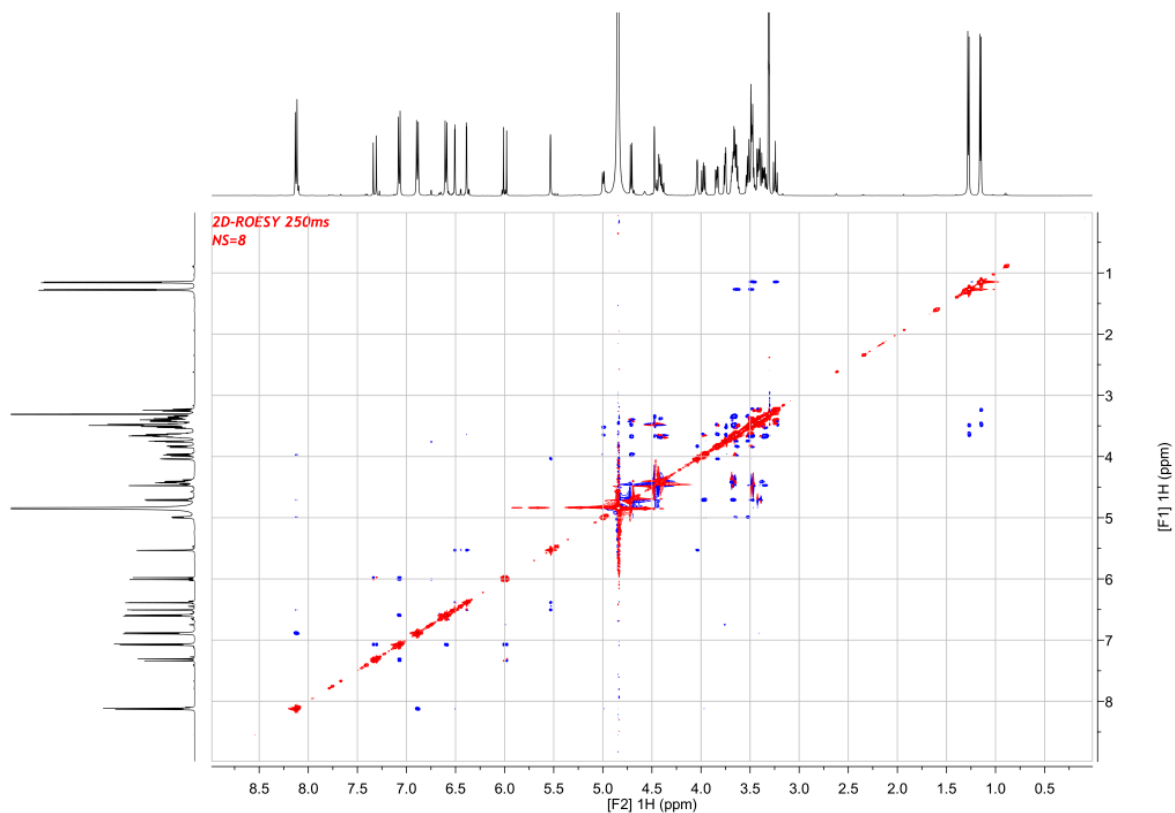

**Figure S114.** 2D g-HSQC-NMR spectrum of compound **11** (methanol-*d*<sub>4</sub>, 500.18 MHz, 125.77 MHz).

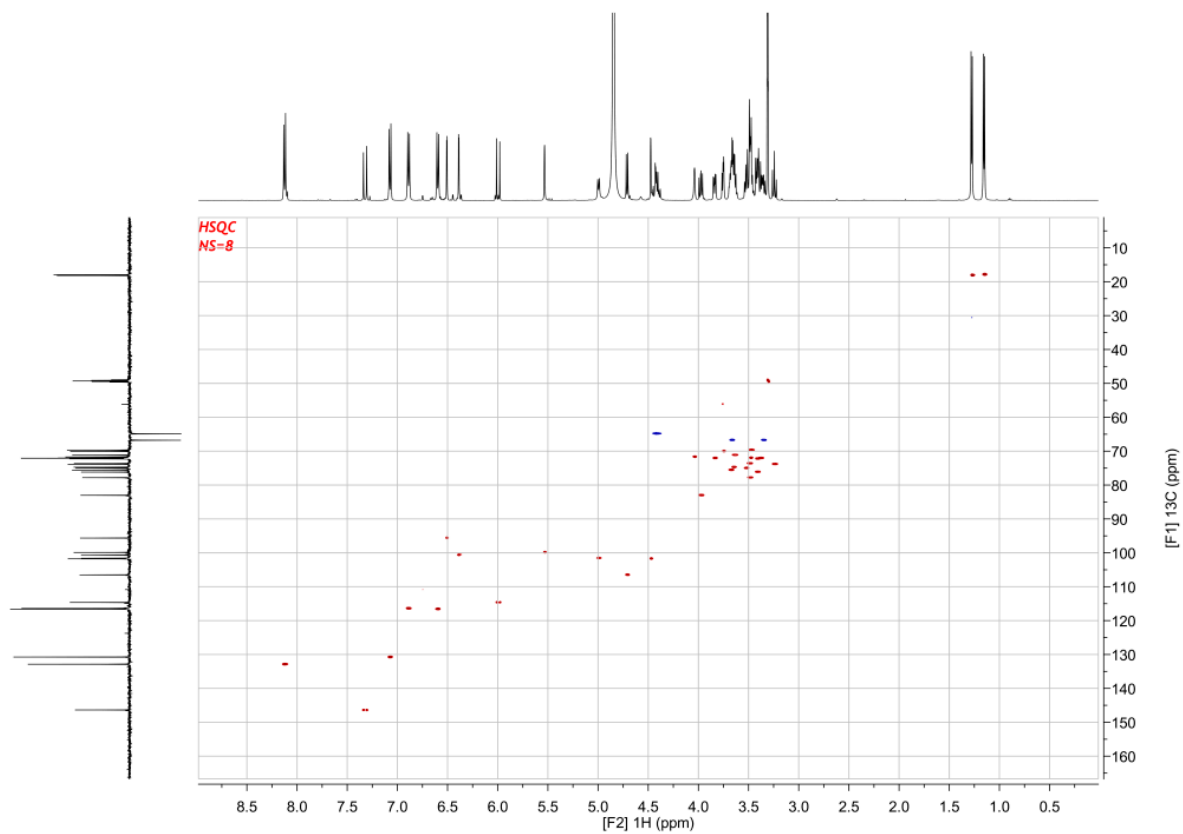

**Figure S115.** 2D g-HSQC-TOCSY NMR spectrum of compound **11** (methanol- $d_4$ , 500.18 MHz, 125.77 MHz).

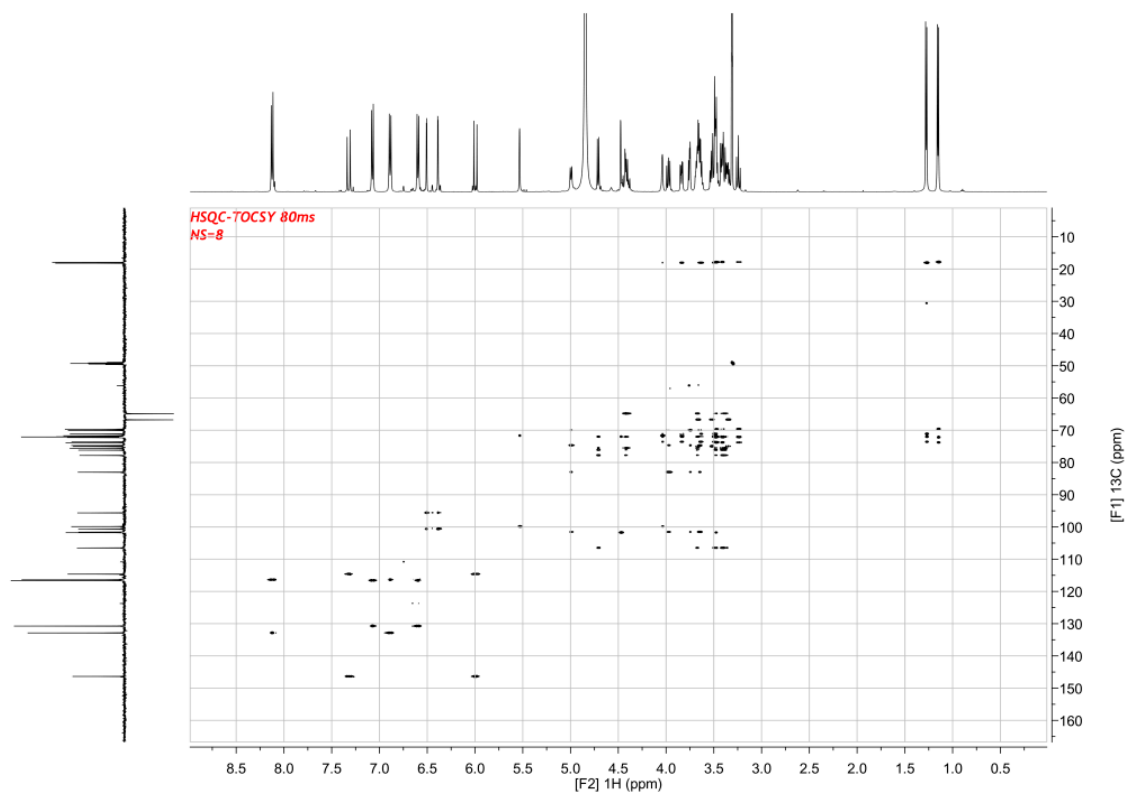

**Figure S116.** 2D g-HMBC-NMR spectrum of compound **11** (methanol- $d_4$ , 500.18 MHz, 125.77 MHz).

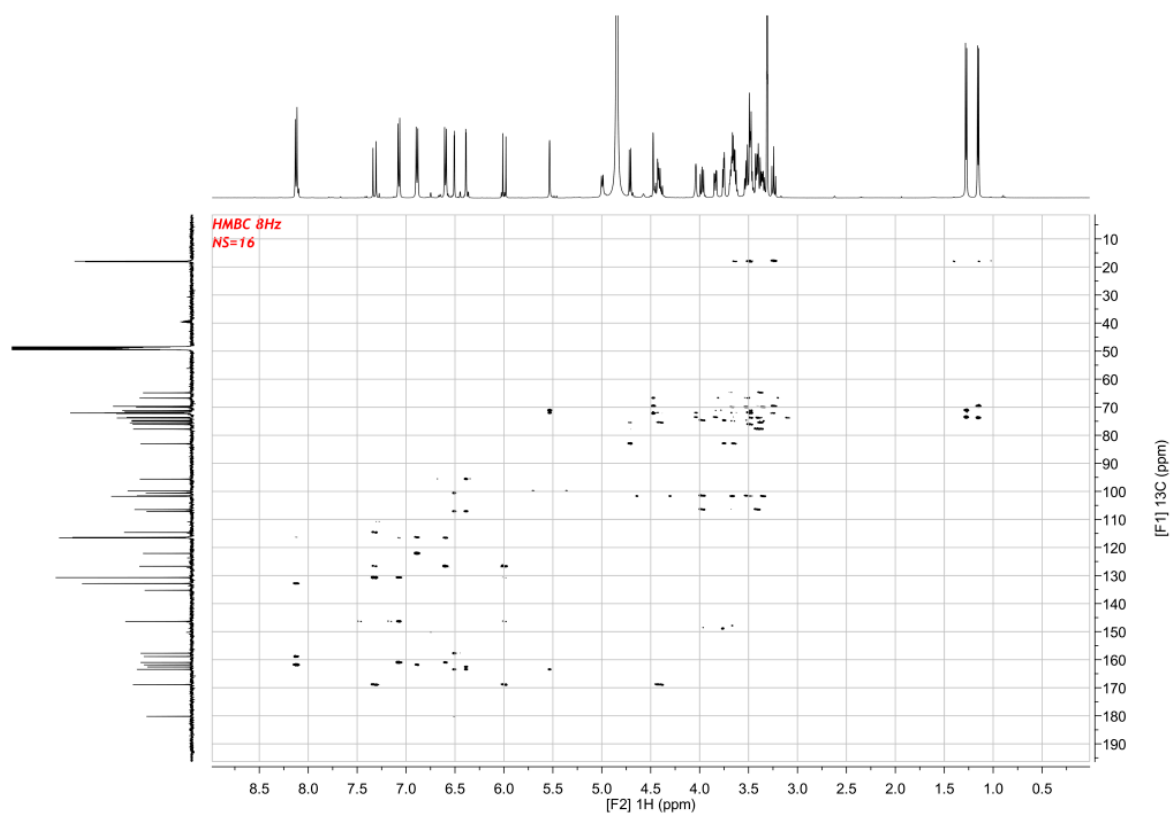



**Figure S117.** 1D TOCSY and 1D ROESY NMR subspectra of H-1(*7-O- $\alpha$ -Rha*) and H-6(*7-O- $\alpha$ -Rha*) in compound **11** (methanol-*d*<sub>4</sub>, 500.18 MHz).

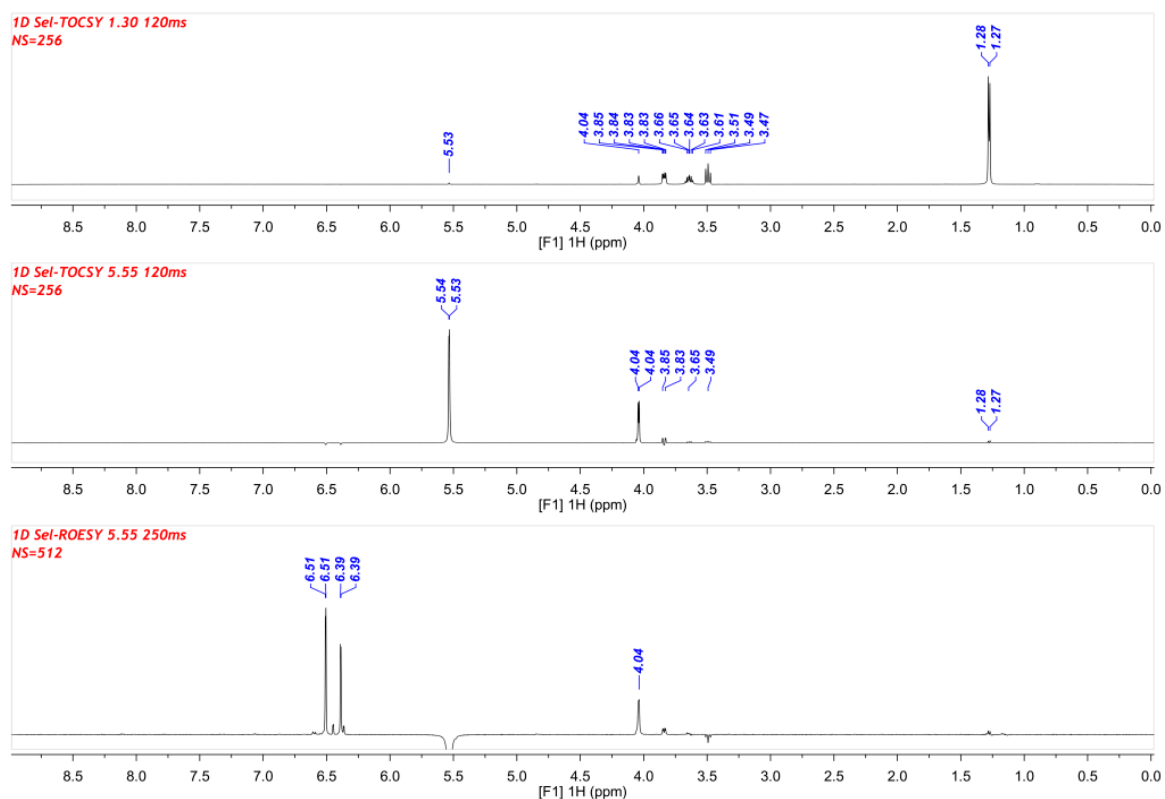

**Figure S118.** 1D TOCSY and 1D ROESY NMR subspectra of H-1(*3-O- $\beta$ -Gal*) in compound **11** (methanol-*d*<sub>4</sub>, 500.18 MHz).

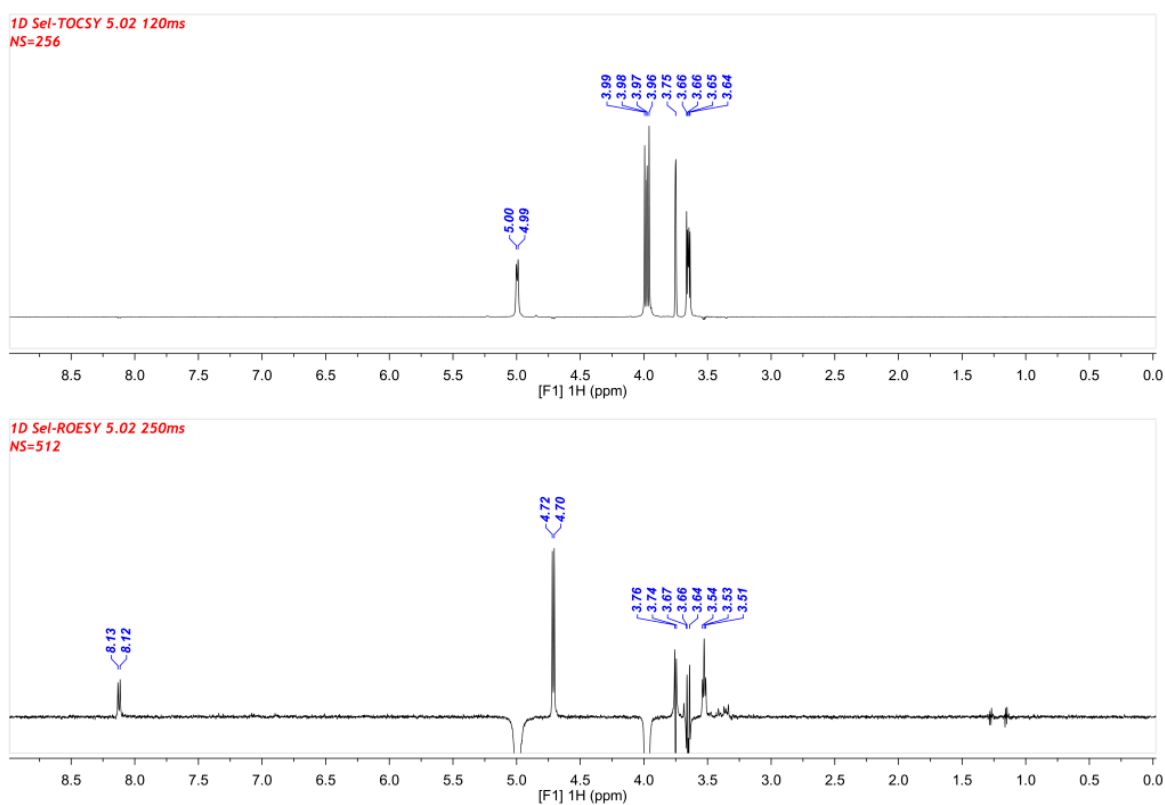

**Figure S119.** 1D TOCSY and 1D ROESY NMR subspectra of H-1( $_2^{\text{Gal}}\text{-O-}\beta\text{-Glc}$ ) in compound **11** (methanol- $d_4$ , 500.18 MHz).

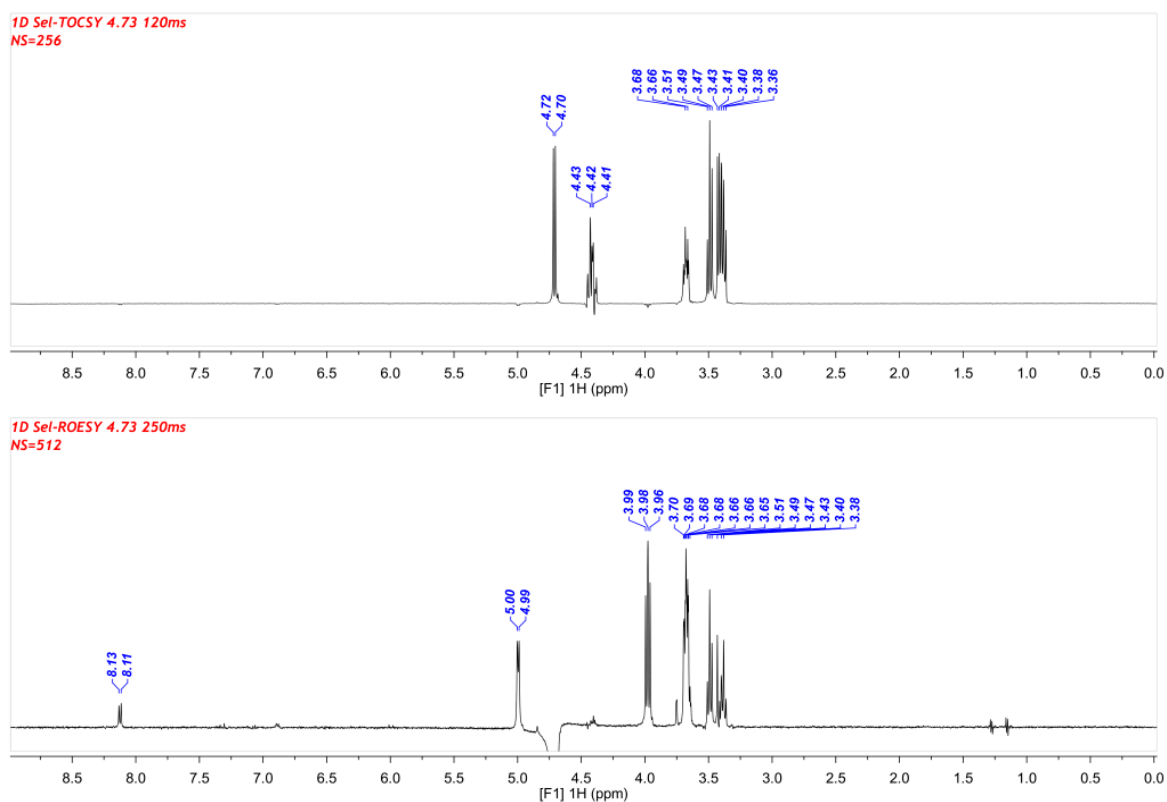

**Figure S120.** 1D TOCSY and 1D ROESY NMR subspectra of H-1( $_6^{\text{Gal}}\text{-O-}\alpha\text{-Rha}$ ) and H-6( $_6^{\text{Gal}}\text{-O-}\alpha\text{-Rha}$ ) in compound **11** (methanol- $d_4$ , 500.18 MHz).

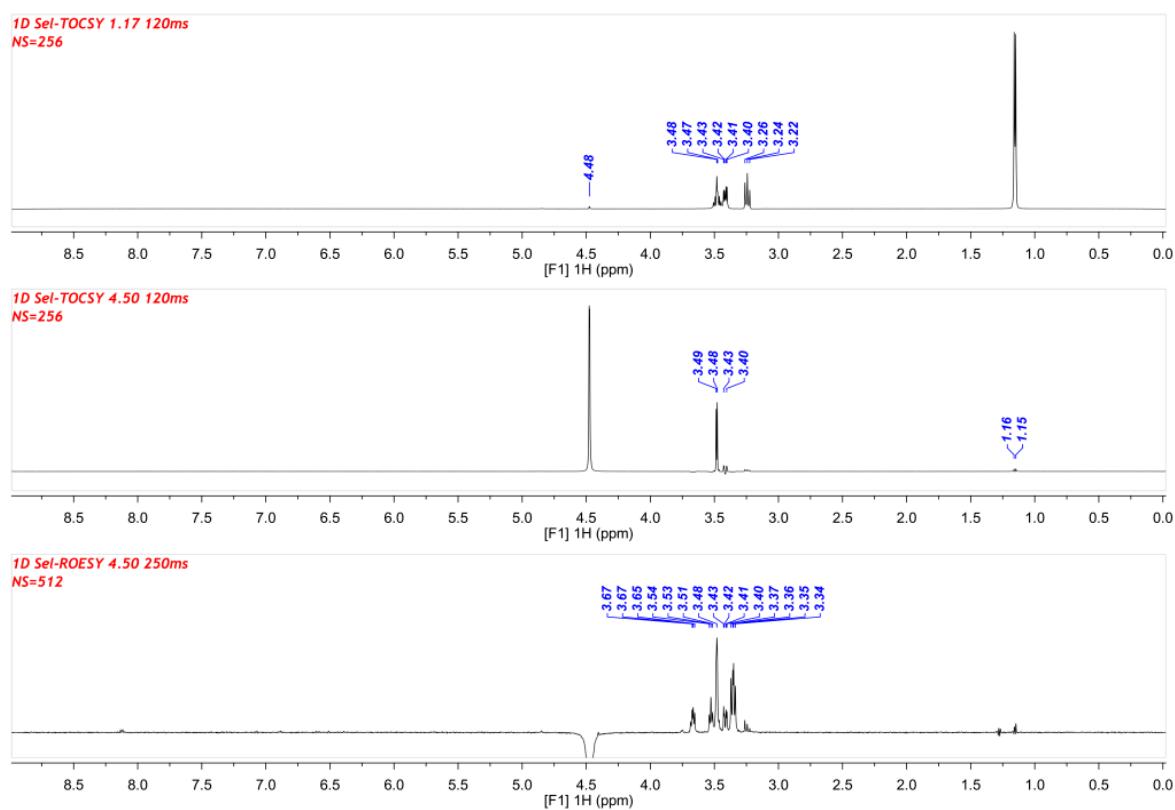

## Compound 12

Figure S121. 1D  $^1\text{H}$ -NMR spectrum of compound 12 (methanol- $d_4$ , 500.18 MHz).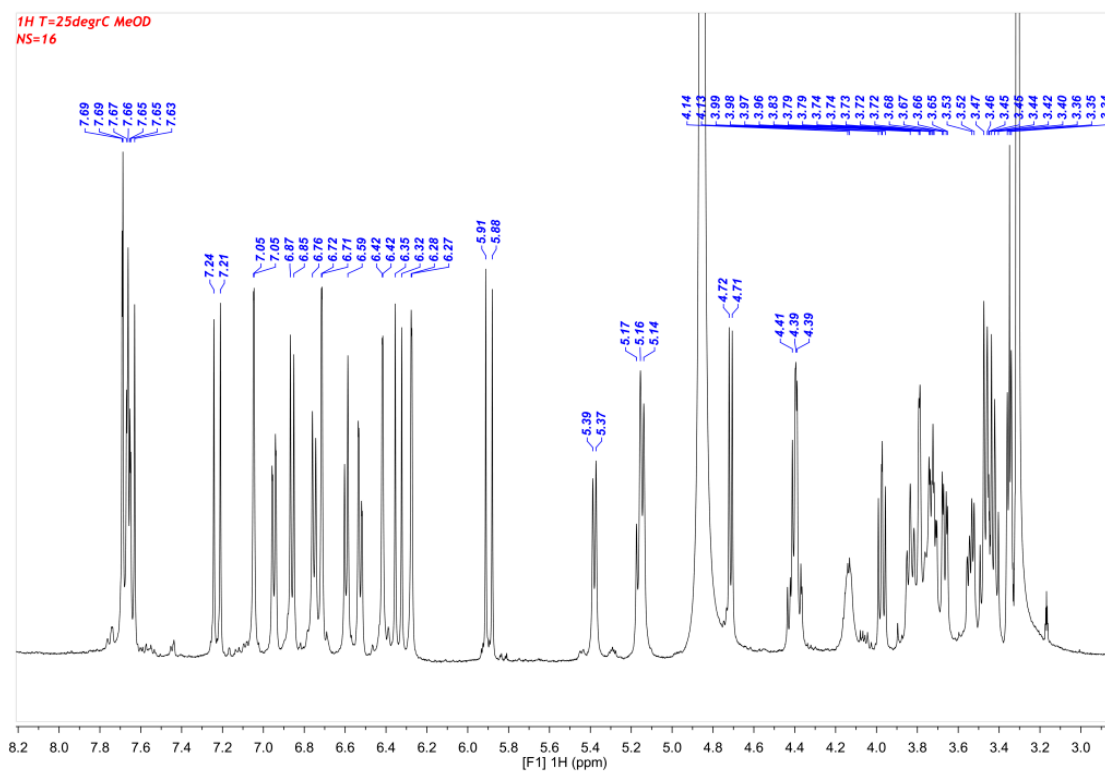Figure S122. 1D  $^{13}\text{C}$ -NMR spectra ( $^1\text{H}$  decoupled and DEPT-135) of compound 12 (methanol- $d_4$ , 125.77 MHz).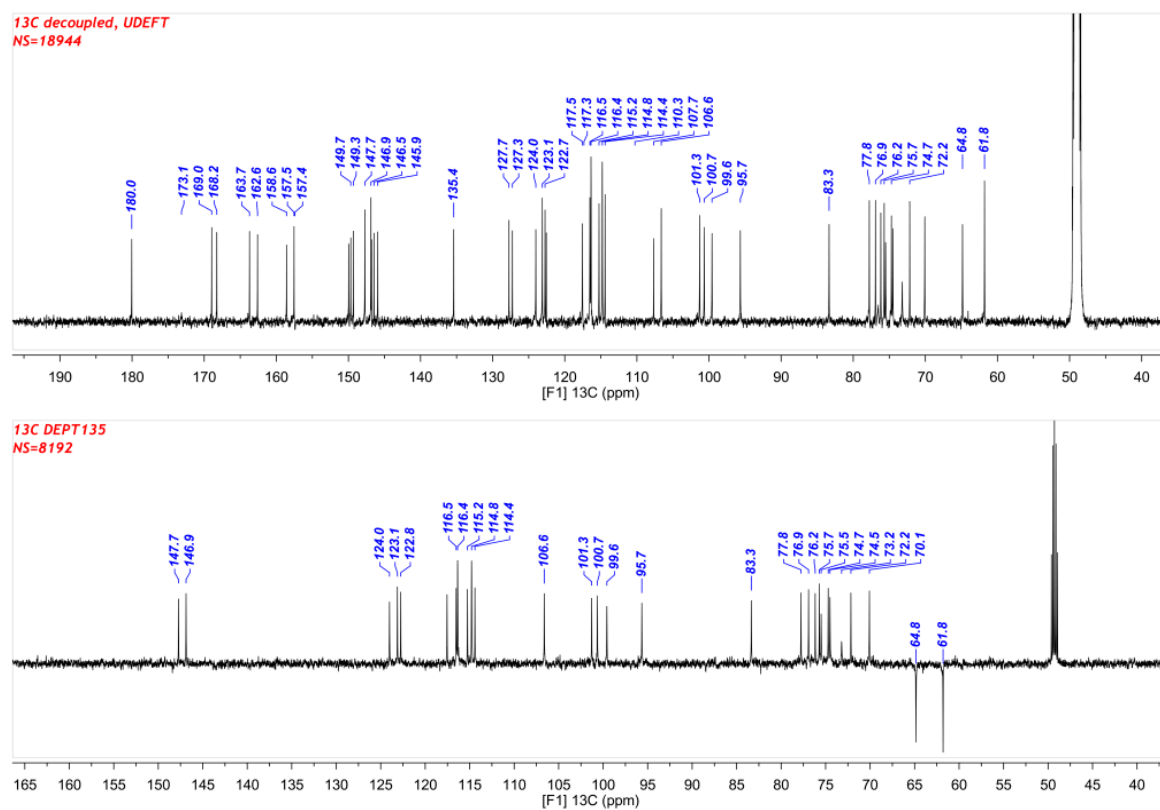

**Figure S123.** 2D g-COSY NMR spectrum of compound **12** (methanol-*d*<sub>4</sub>, 500.18 MHz).

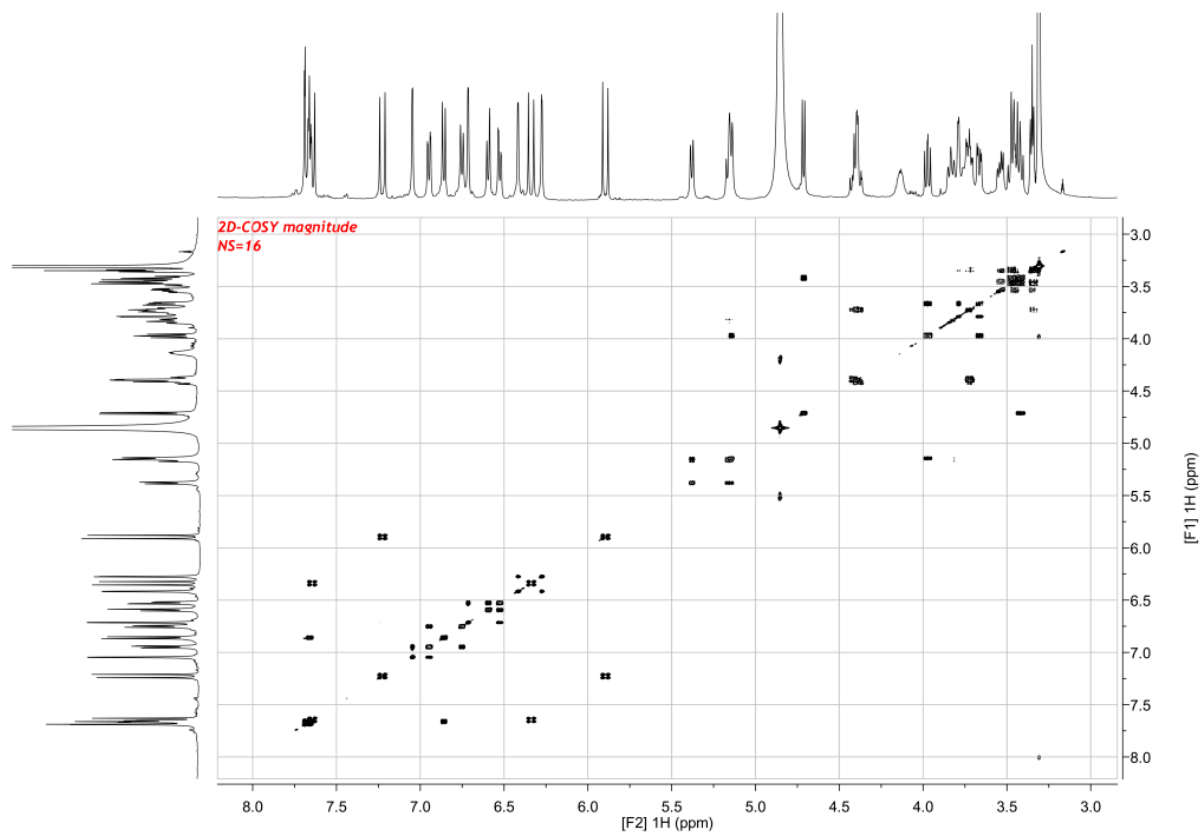

**Figure S124.** 2D TOCSY NMR spectrum of compound **12** (methanol-*d*<sub>4</sub>, 500.18 MHz).

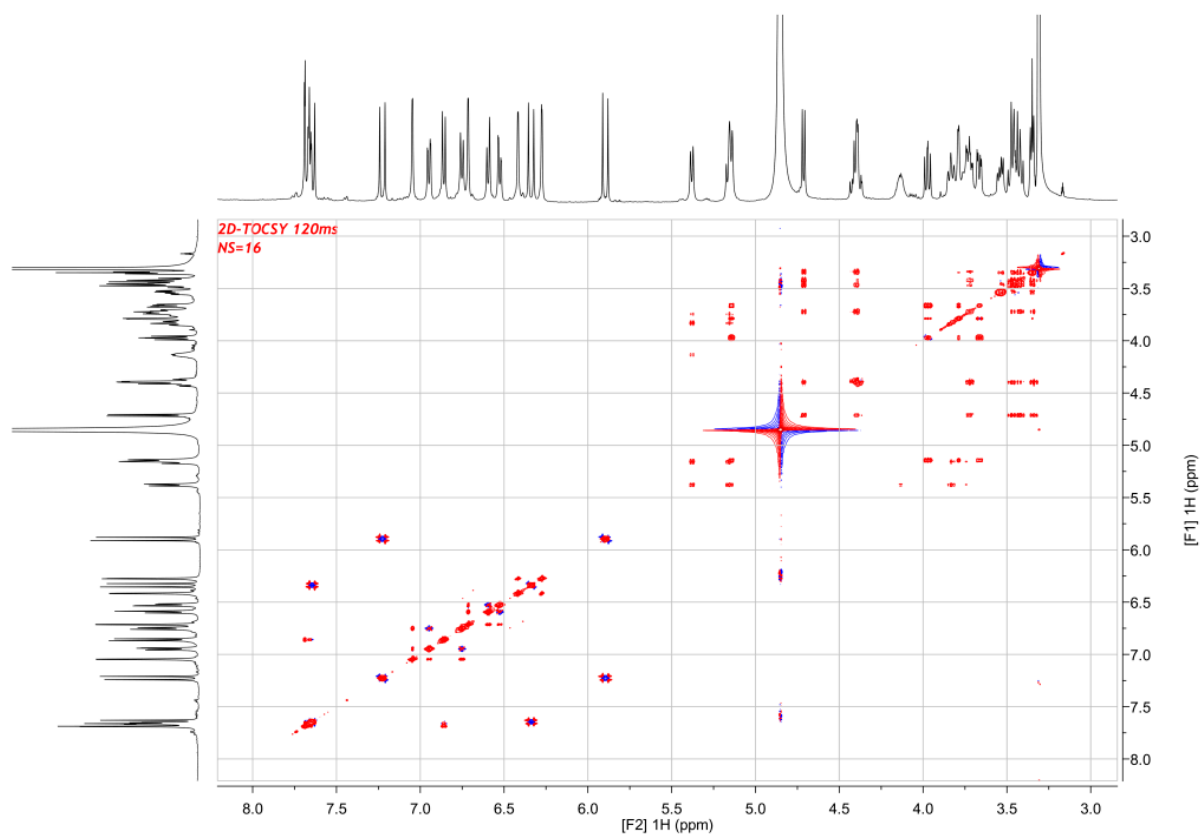

**Figure S125.** 2D ROESY NMR spectrum of compound **12** (methanol-*d*<sub>4</sub>, 500.18 MHz).

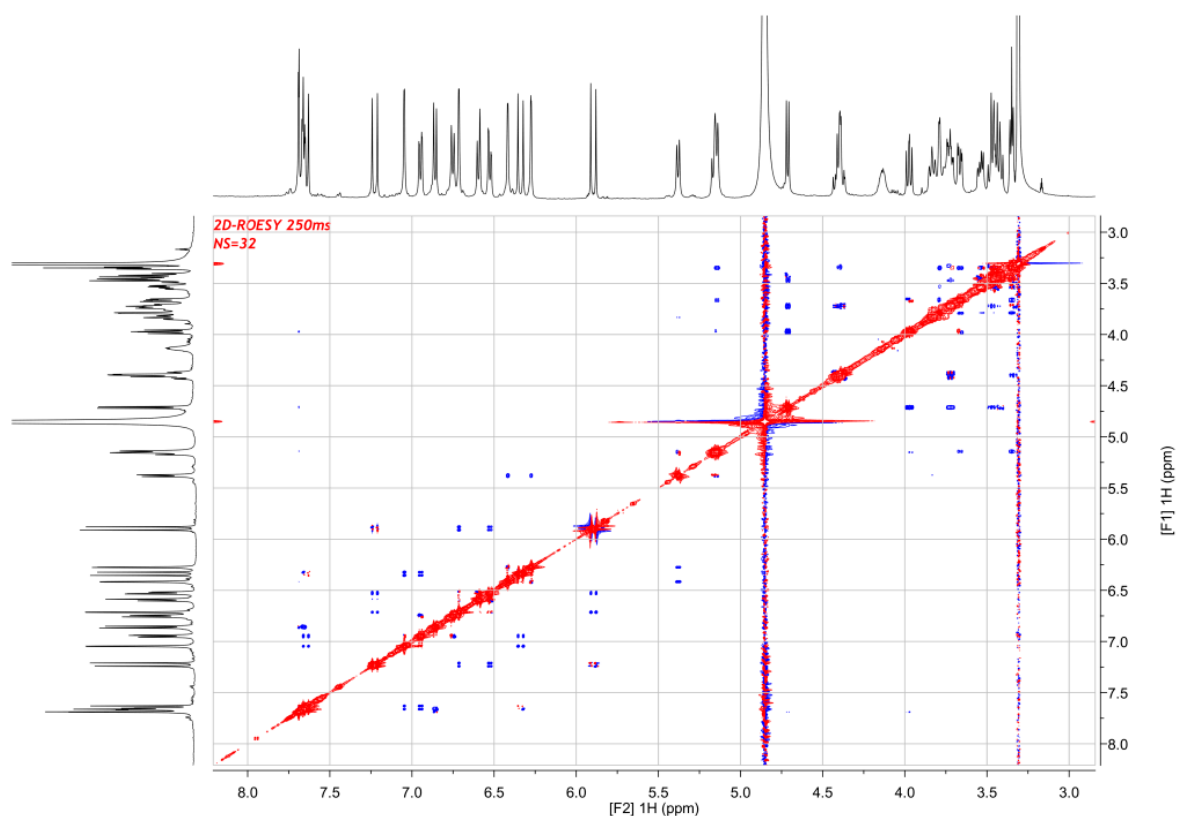

**Figure S126.** 2D *g*-HSQC-NMR spectrum of compound **12** (methanol-*d*<sub>4</sub>, 500.18 MHz, 125.77 MHz).

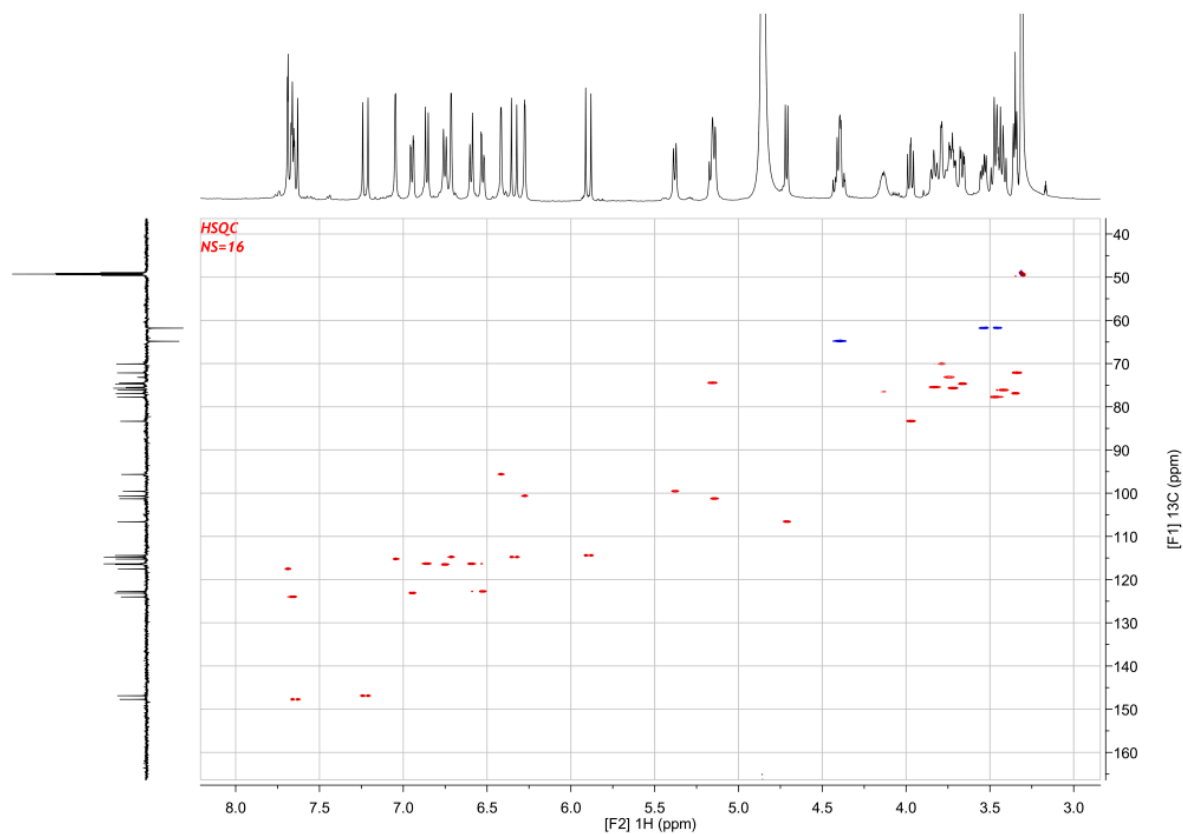

**Figure S127.** 2D g-HSQC-TOCSY NMR spectrum of compound **12** (methanol- $d_4$ , 500.18 MHz, 125.77 MHz).

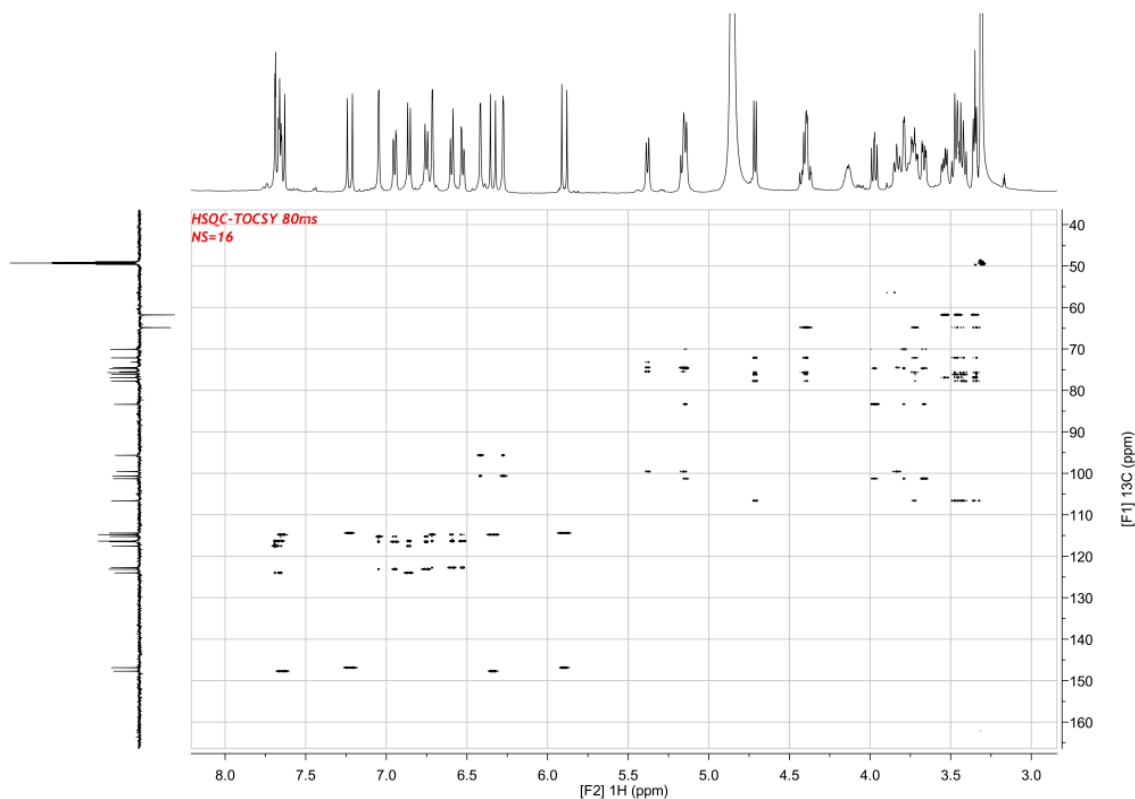

**Figure S128.** 2D g-HMBC-NMR spectrum of compound **12** (methanol- $d_4$ , 500.18 MHz, 125.77 MHz).

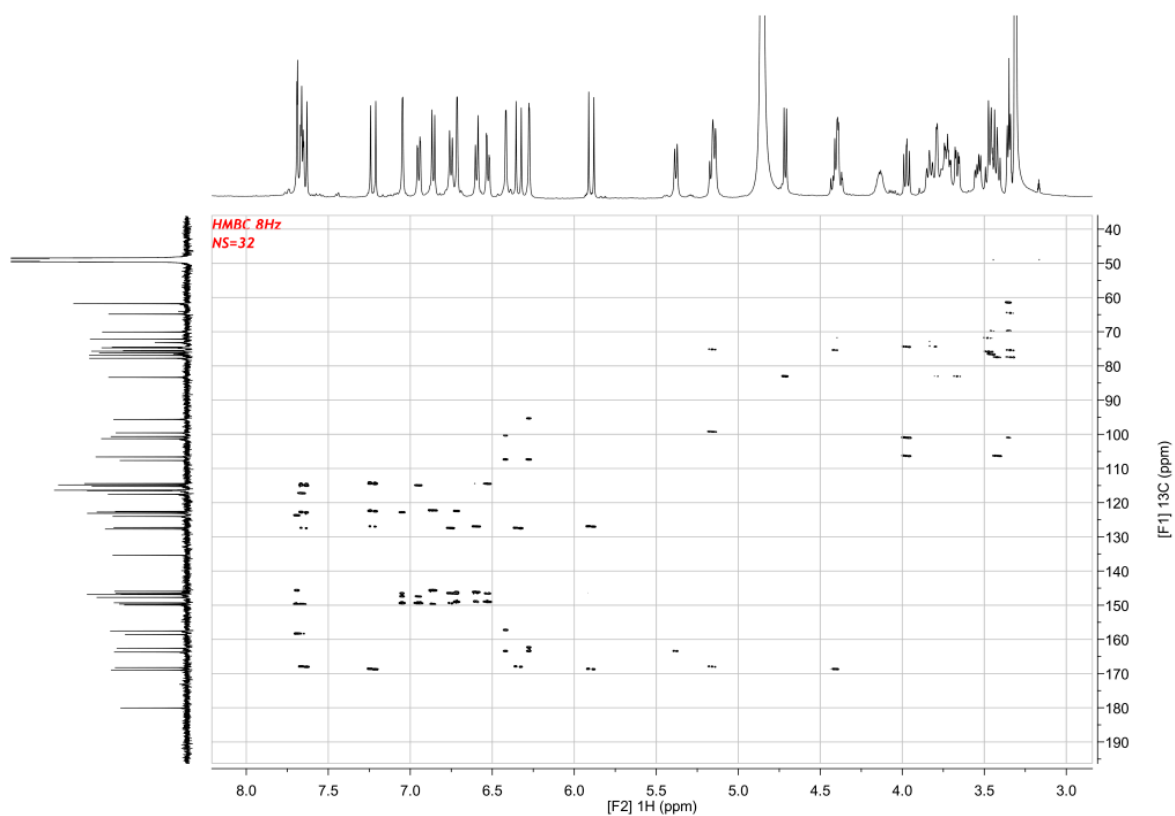

**Figure S129.** 1D TOCSY and 1D ROESY NMR subspectra of H-1(*7-O*- $\beta$ -GlcA) in compound **12** (methanol-*d*<sub>4</sub>, 500.18 MHz).

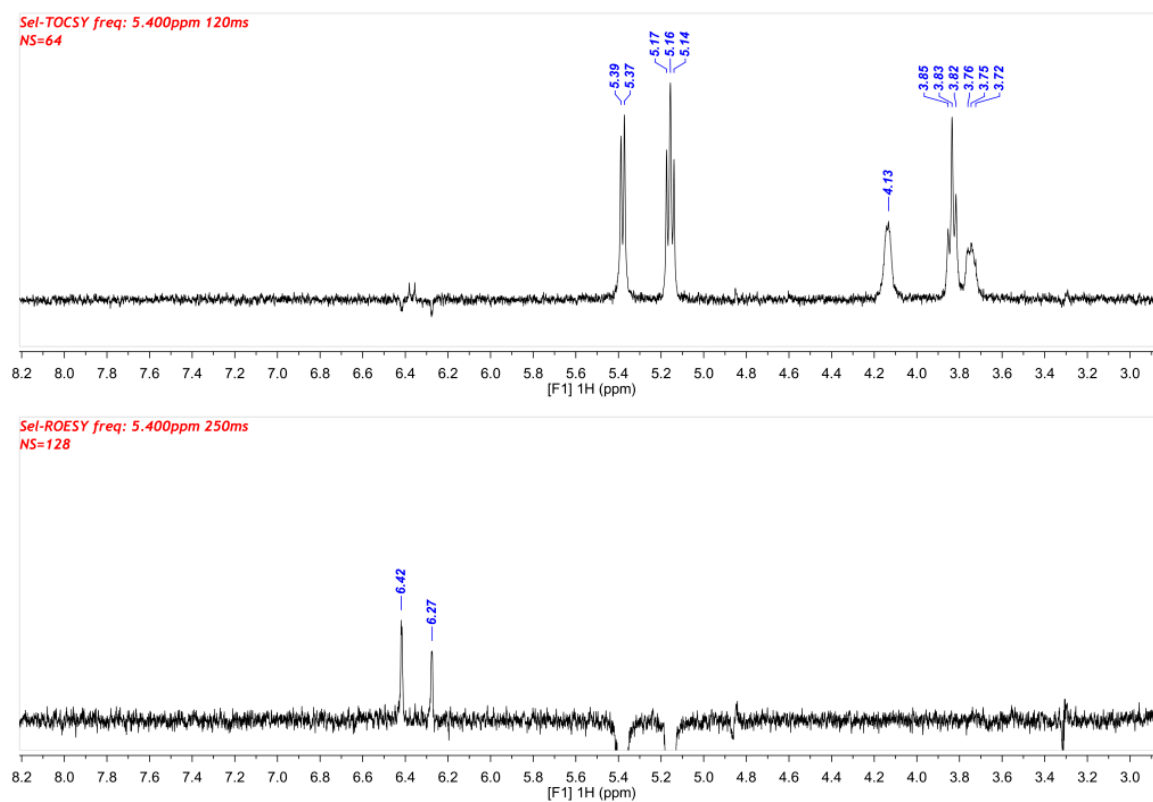

**Figure S130.** 1D TOCSY NMR subspectrum of H-2(*3-O*- $\beta$ -Gal) in compound **12** (methanol-*d*<sub>4</sub>, 500.18 MHz).

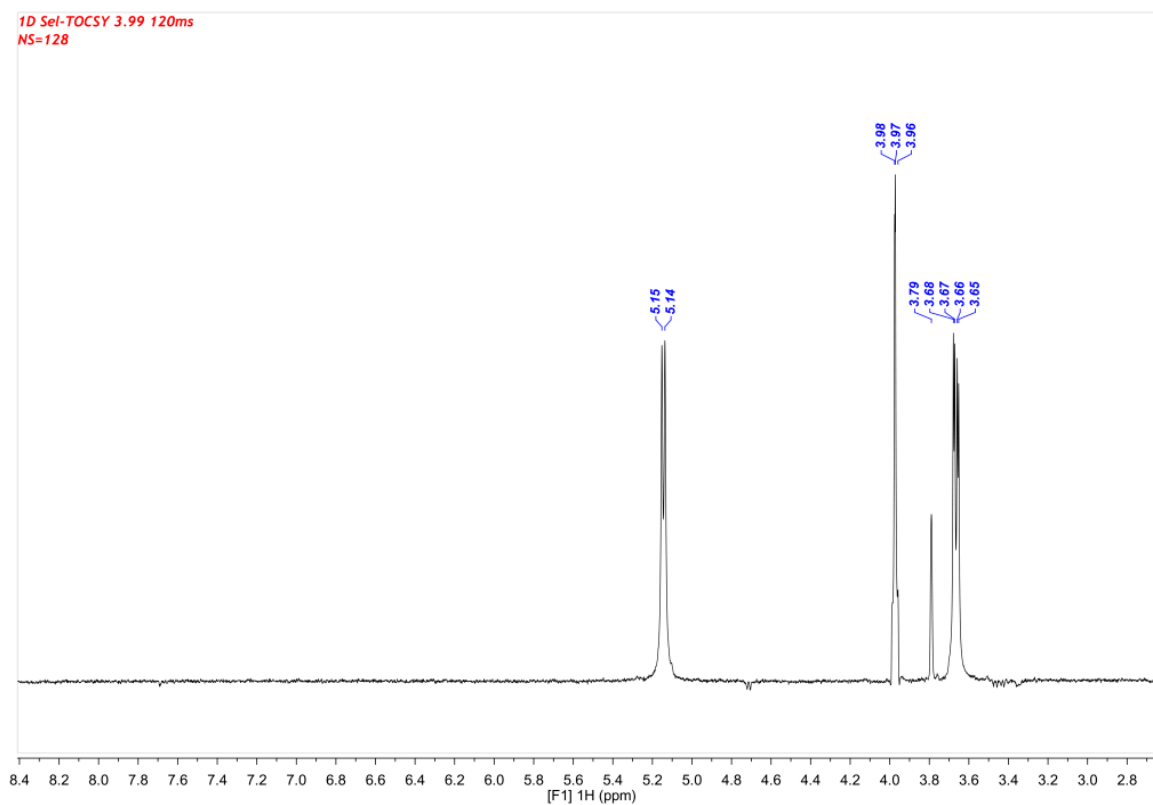

**Figure S131.** 1D TOCSY and 1D ROESY NMR subspectra of H-1(<sub>2</sub><sup>Gal</sup>-O-β-Glc) in compound **12** (methanol-*d*<sub>4</sub>, 500.18 MHz).

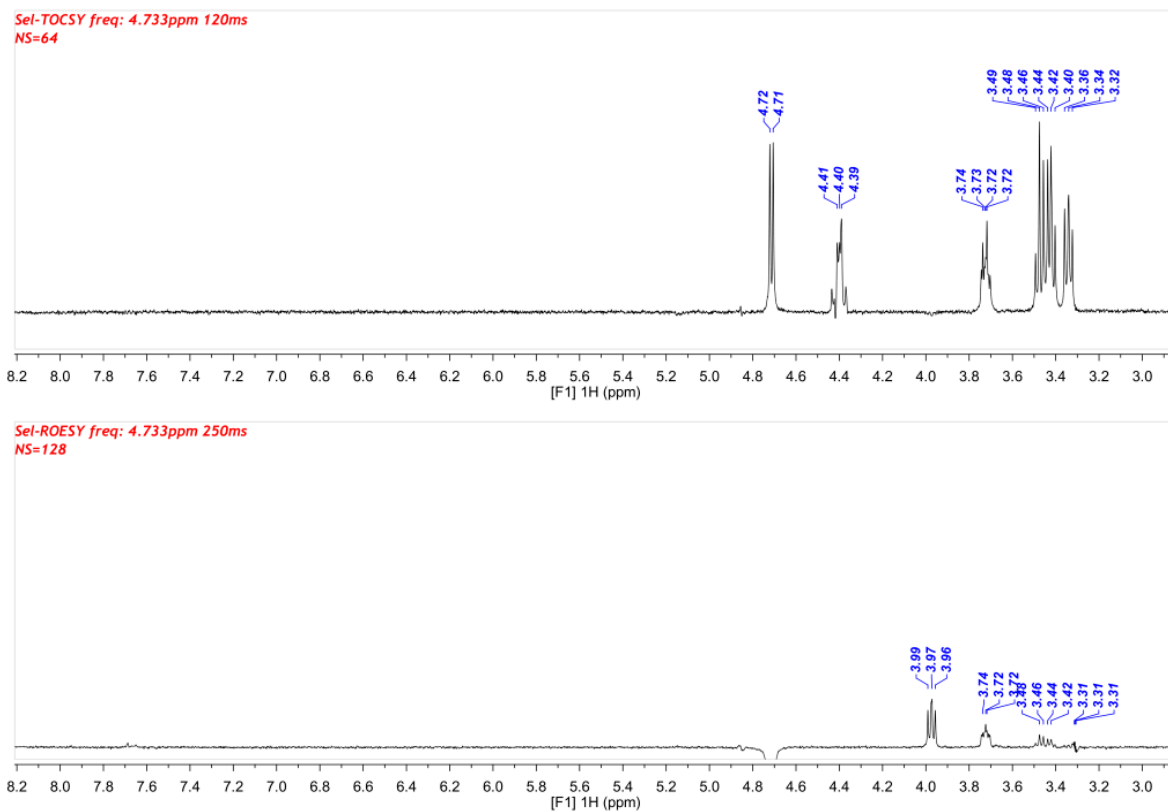

## Compound 13

**Figure S132.** 1D <sup>1</sup>H-NMR spectrum of compound **13** (methanol-*d*<sub>4</sub>, 500.18 MHz).

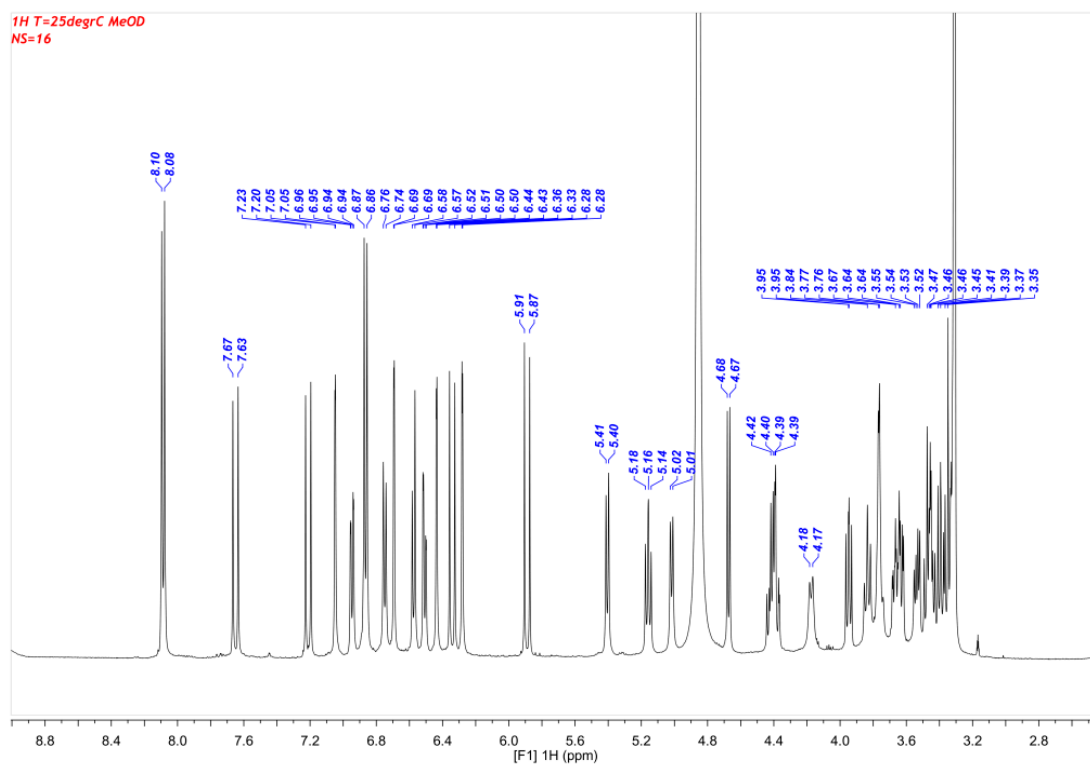



**Figure S133.** 1D  $^{13}\text{C}$ -NMR spectra (1H decoupled and DEPT-135) of compound **13** (methanol- $d_4$ , 125.77 MHz).

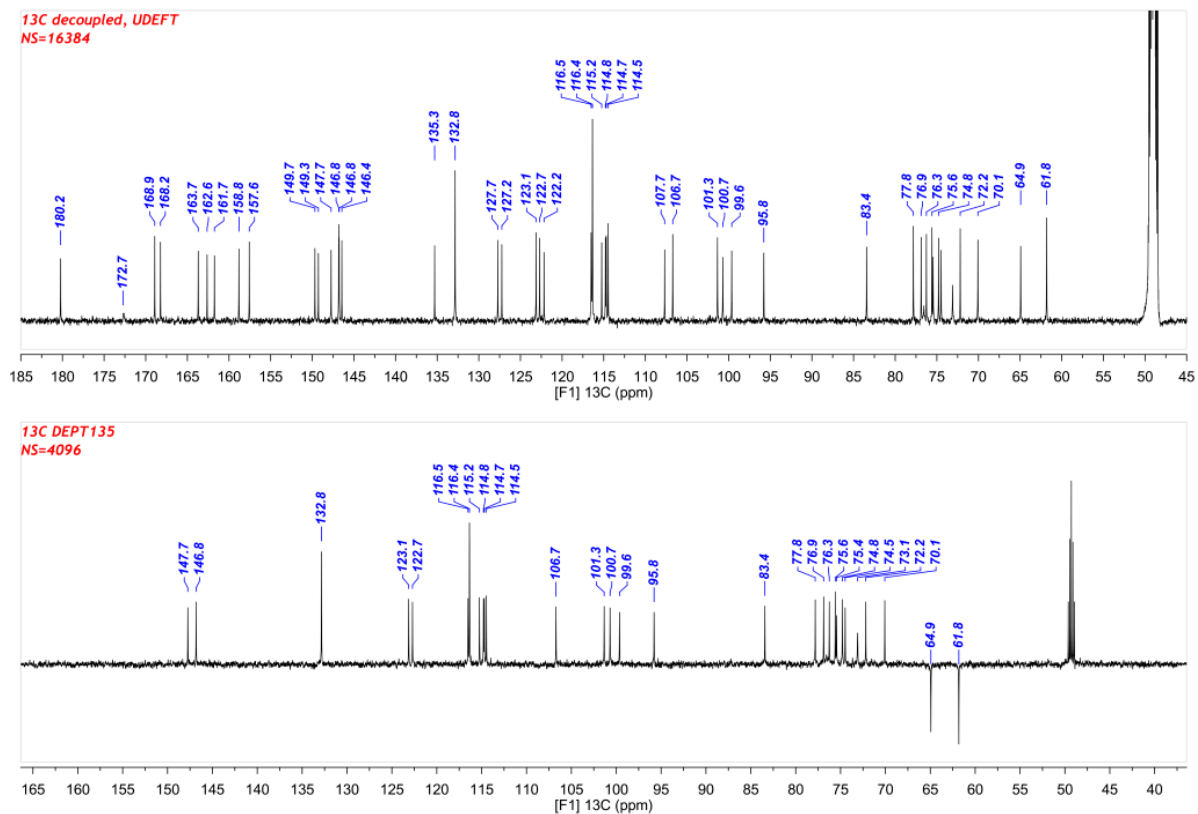

**Figure S134.** 2D g-COSY NMR spectrum of compound **13** (methanol- $d_4$ , 500.18 MHz).

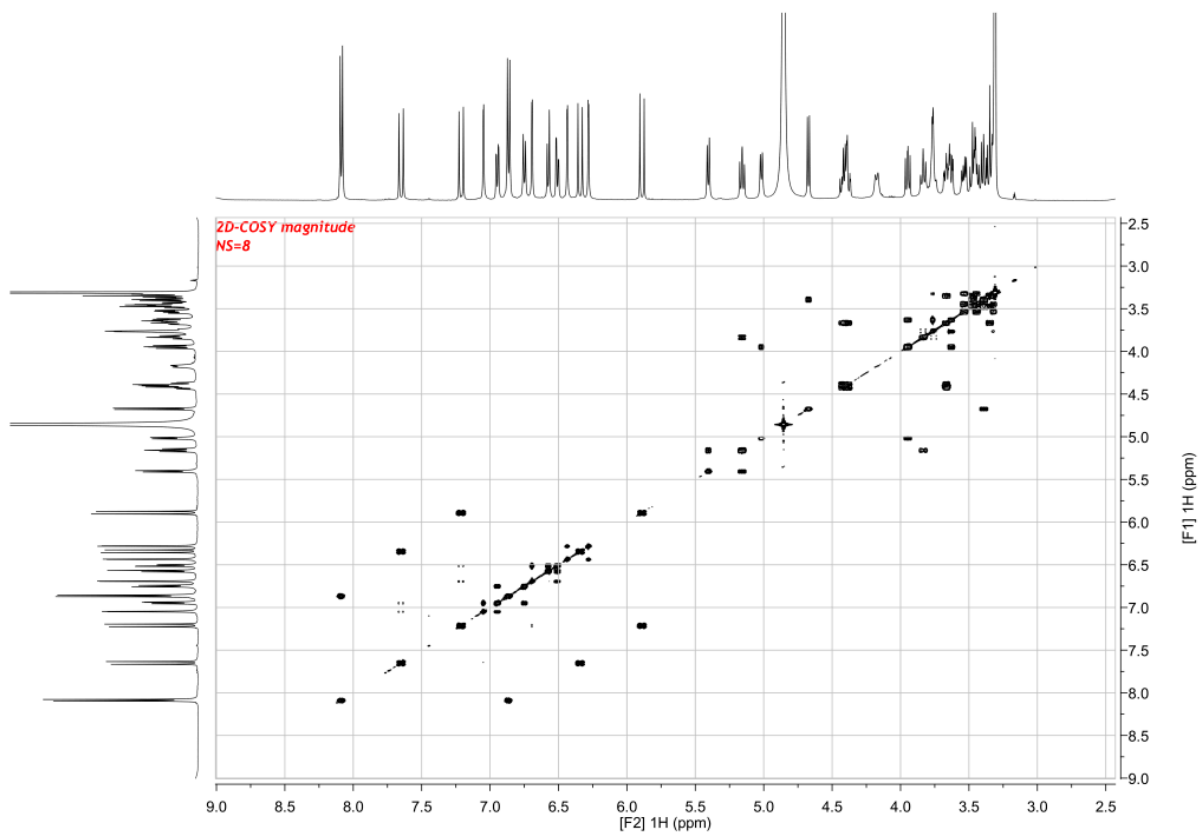

**Figure S135.** 2D TOCSY NMR spectrum of compound **13** (methanol- $d_4$ , 500.18 MHz).

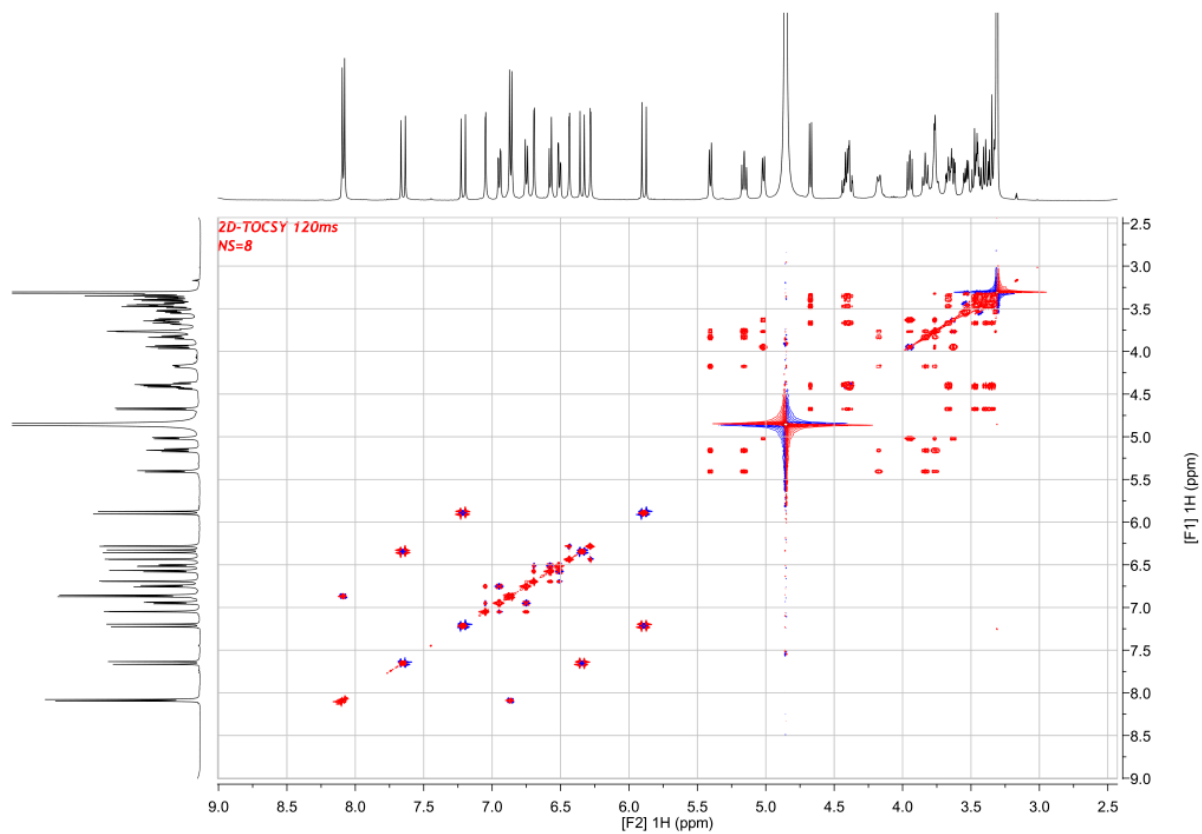

**Figure S136.** 2D ROESY NMR spectrum of compound **13** (methanol- $d_4$ , 500.18 MHz).

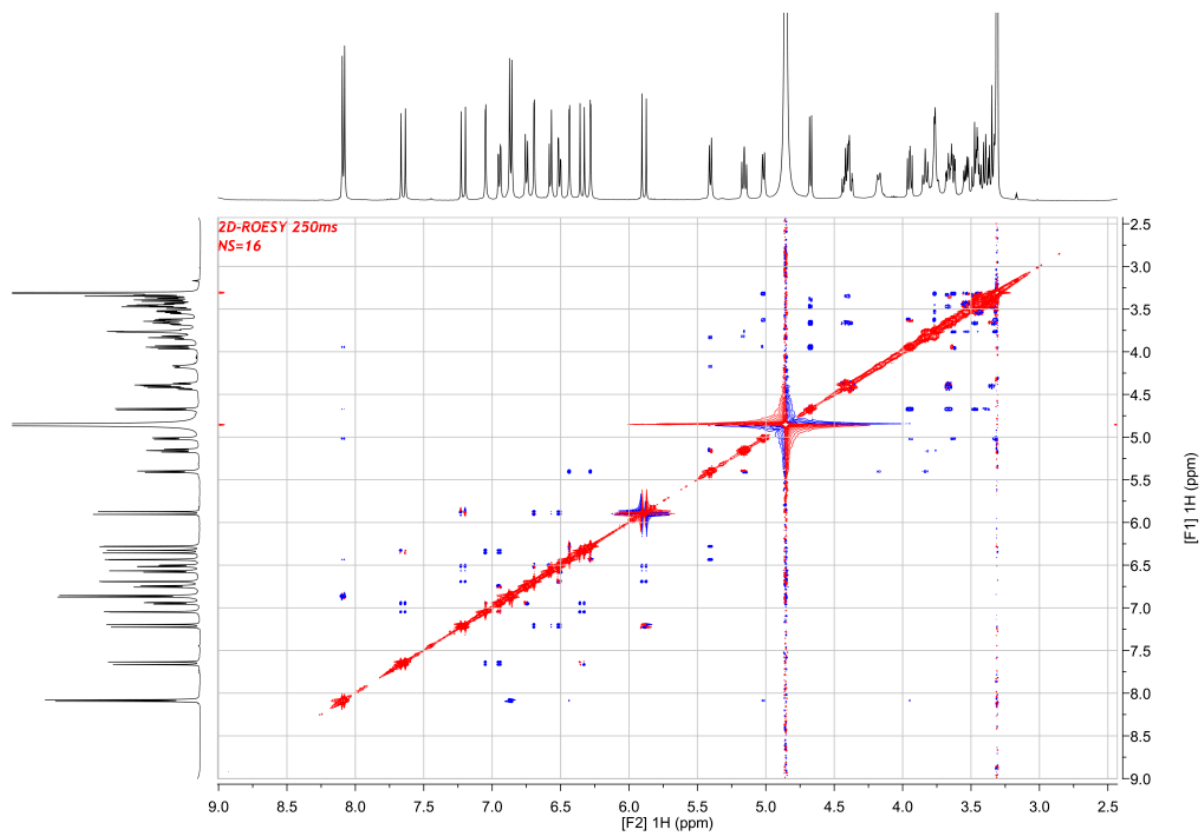

**Figure S137.** 2D *g*-HSQC-NMR spectrum of compound **13** (methanol-*d*<sub>4</sub>, 500.18 MHz, 125.77 MHz).

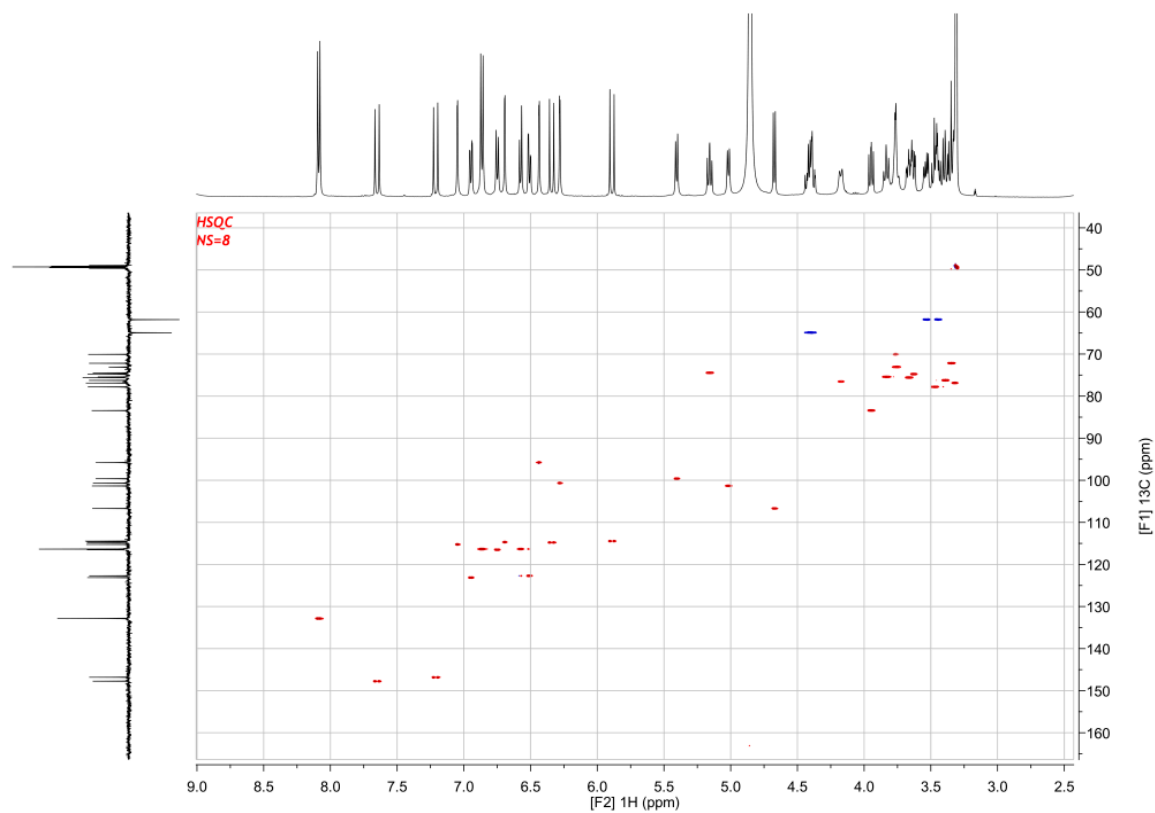

**Figure S138.** 2D *g*-HSQC-TOCSY NMR spectrum of compound **13** (methanol-*d*<sub>4</sub>, 500.18 MHz, 125.77 MHz).

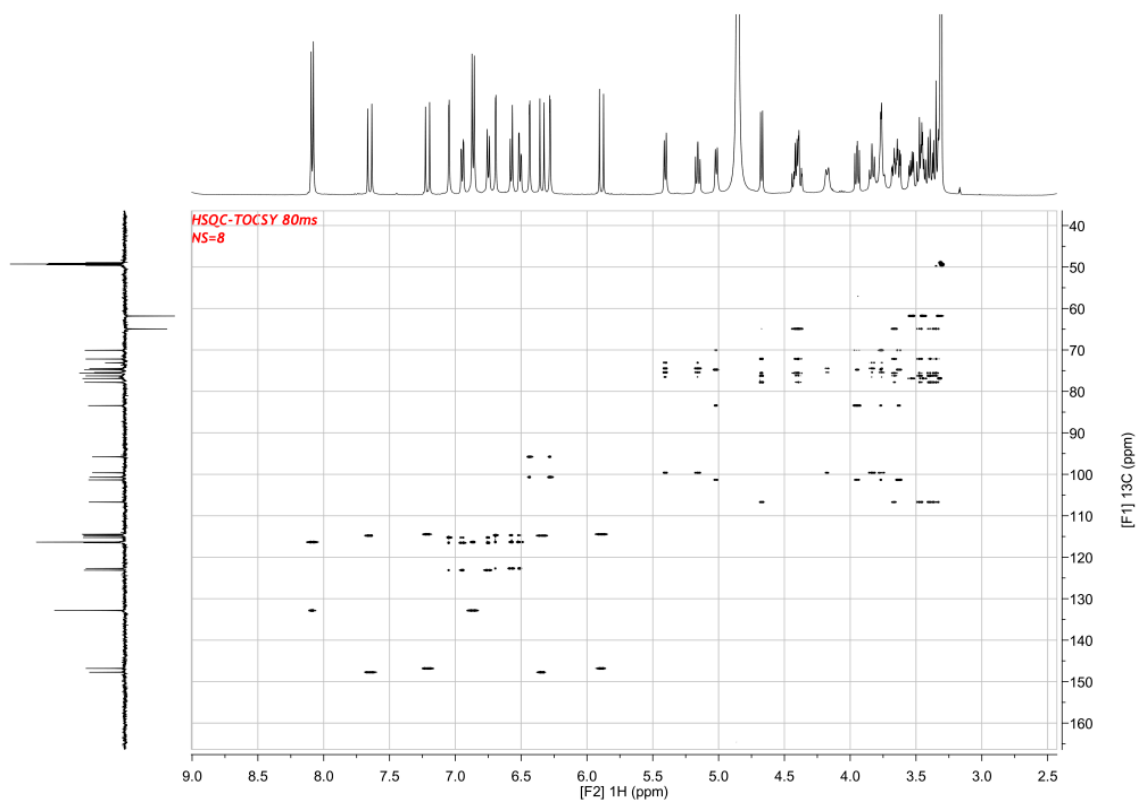

**Figure S139.** 2D g-HMBC-NMR spectrum of compound **13** (methanol- $d_4$ , 500.18 MHz, 125.77 MHz).

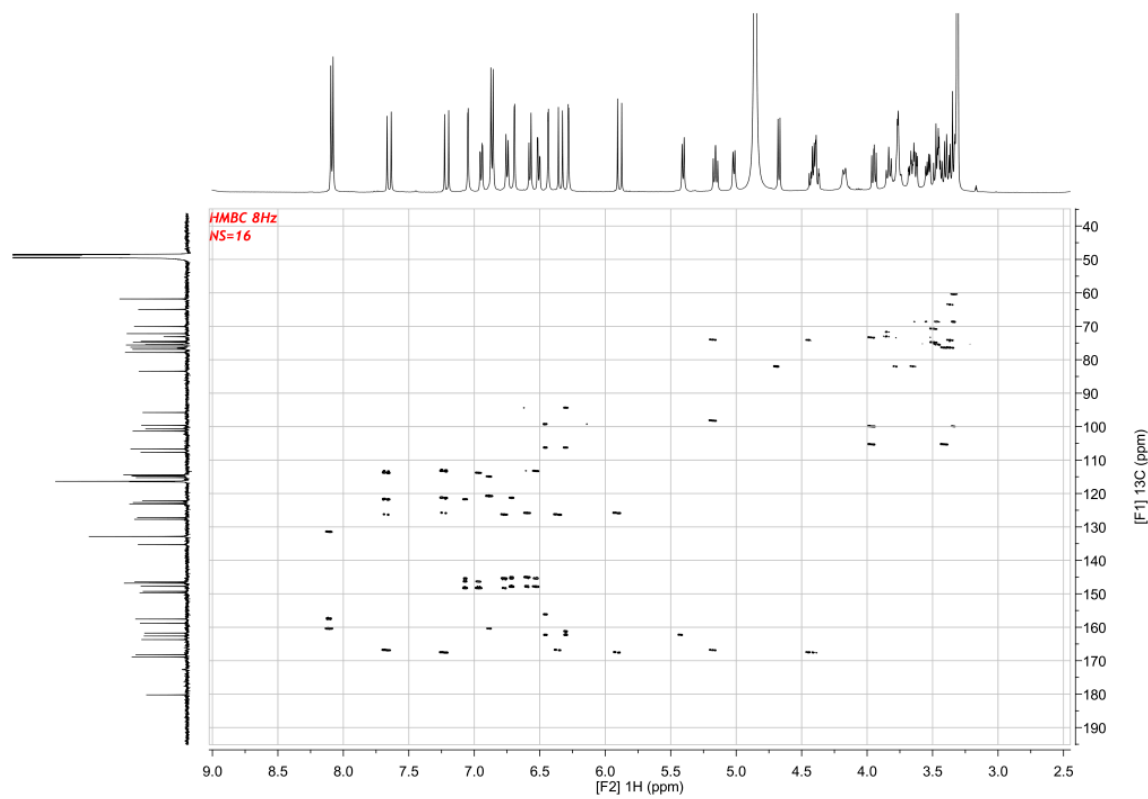

**Figure S140.** 1D TOCSY and 1D ROESY NMR subspectra of H-1( $7-O-\beta$ -GlcA) in compound **13** (methanol- $d_4$ , 500.18 MHz).

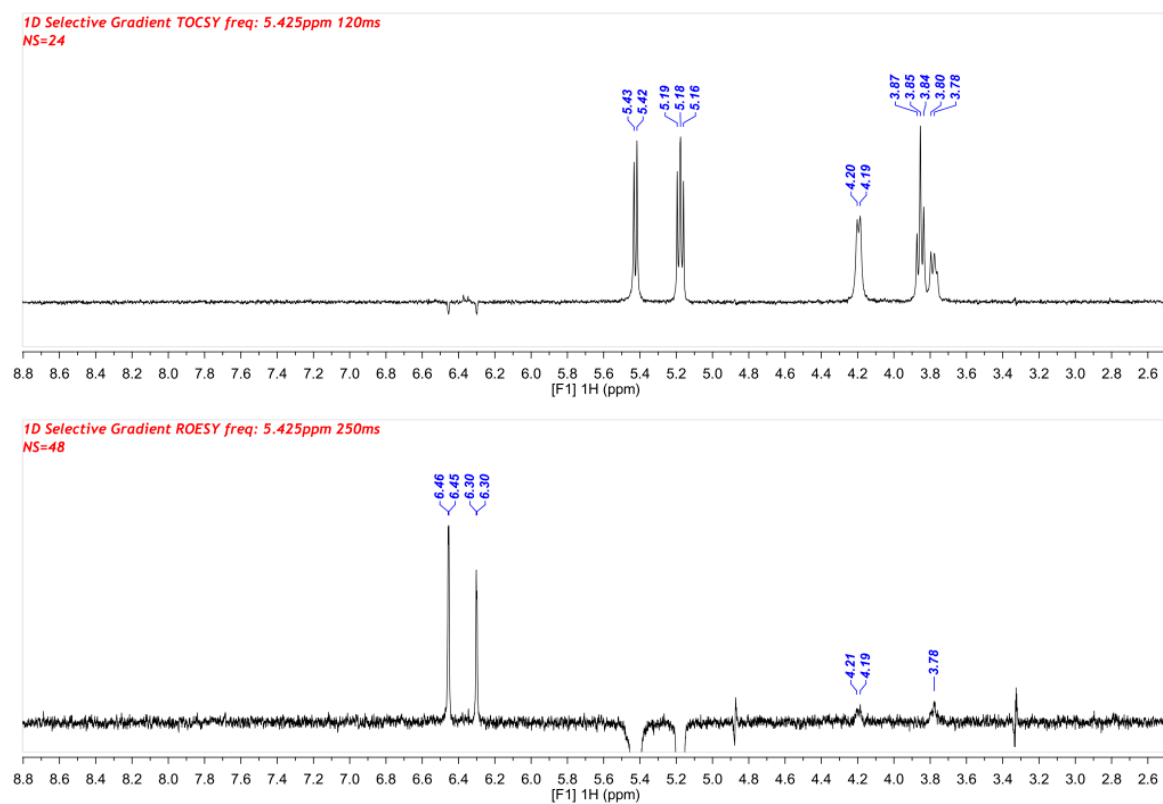

**Figure S141.** 1D TOCSY and 1D ROESY NMR subspectra of H-1(<sub>3</sub>-O-β-Gal) in compound **13** (methanol-*d*<sub>4</sub>, 500.18 MHz).

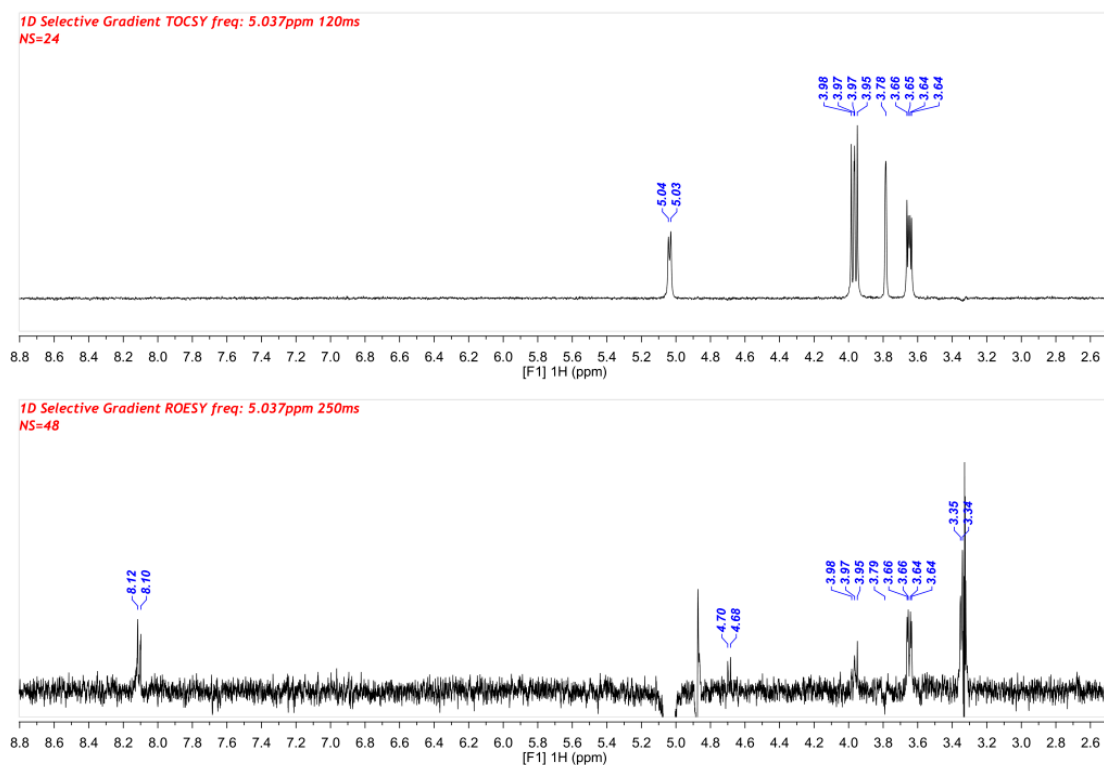

**Figure S142.** 1D TOCSY and 1D ROESY NMR subspectra of H-1(<sub>2</sub><sup>Gal</sup>-O-β-Glc) in compound **13** (methanol-*d*<sub>4</sub>, 500.18 MHz).

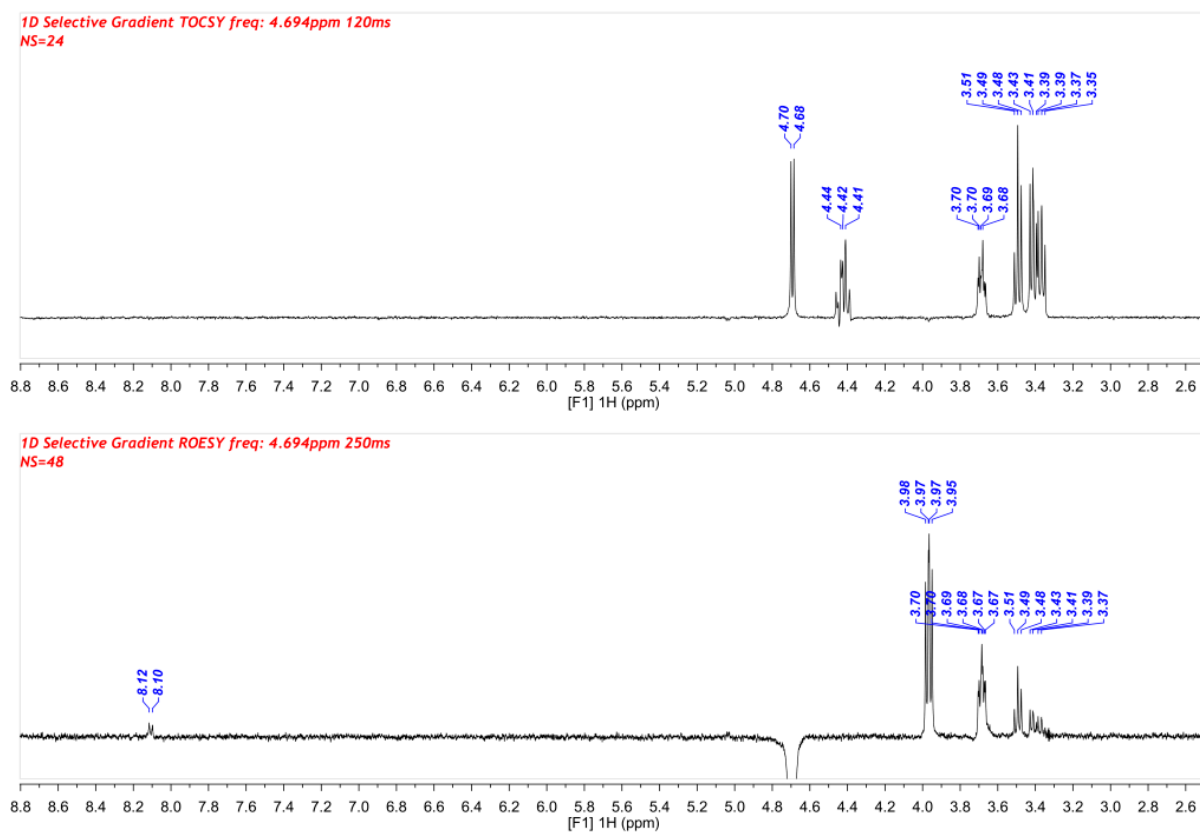

## Compound 14

Figure S143. 1D  $^1\text{H}$ -NMR spectrum of compound **14** (methanol- $d_4$ , 500.18 MHz).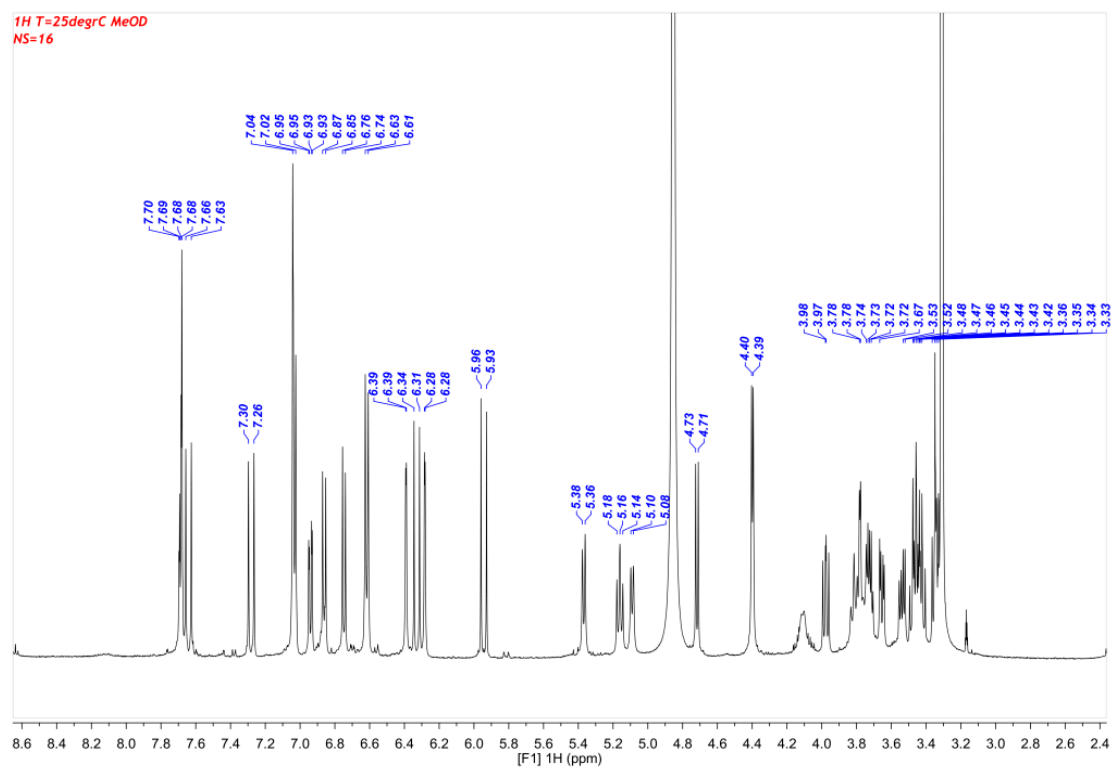Figure S144. 1D  $^{13}\text{C}$ -NMR spectra (1H decoupled and DEPT-135) of compound **14** (methanol- $d_4$ , 125.77 MHz).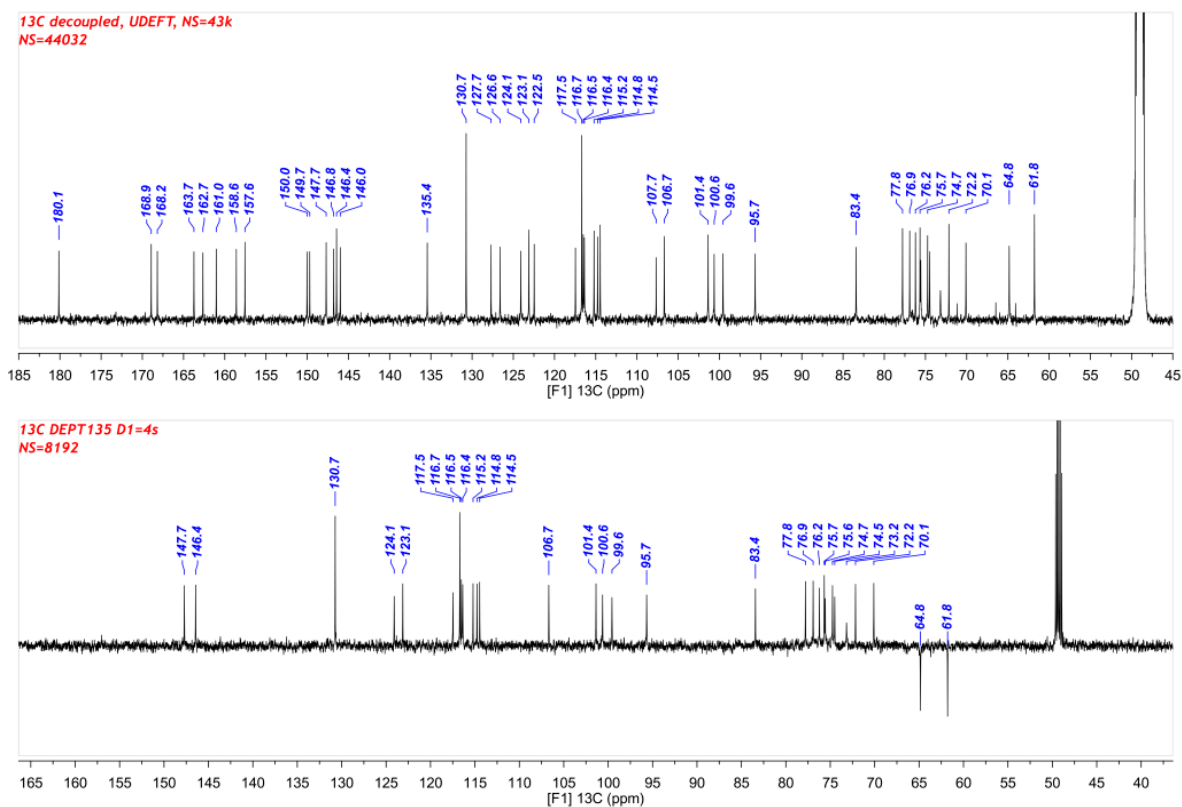

**Figure S145.** 2D g-COSY NMR spectrum of compound **14** (methanol-*d*<sub>4</sub>, 500.18 MHz).

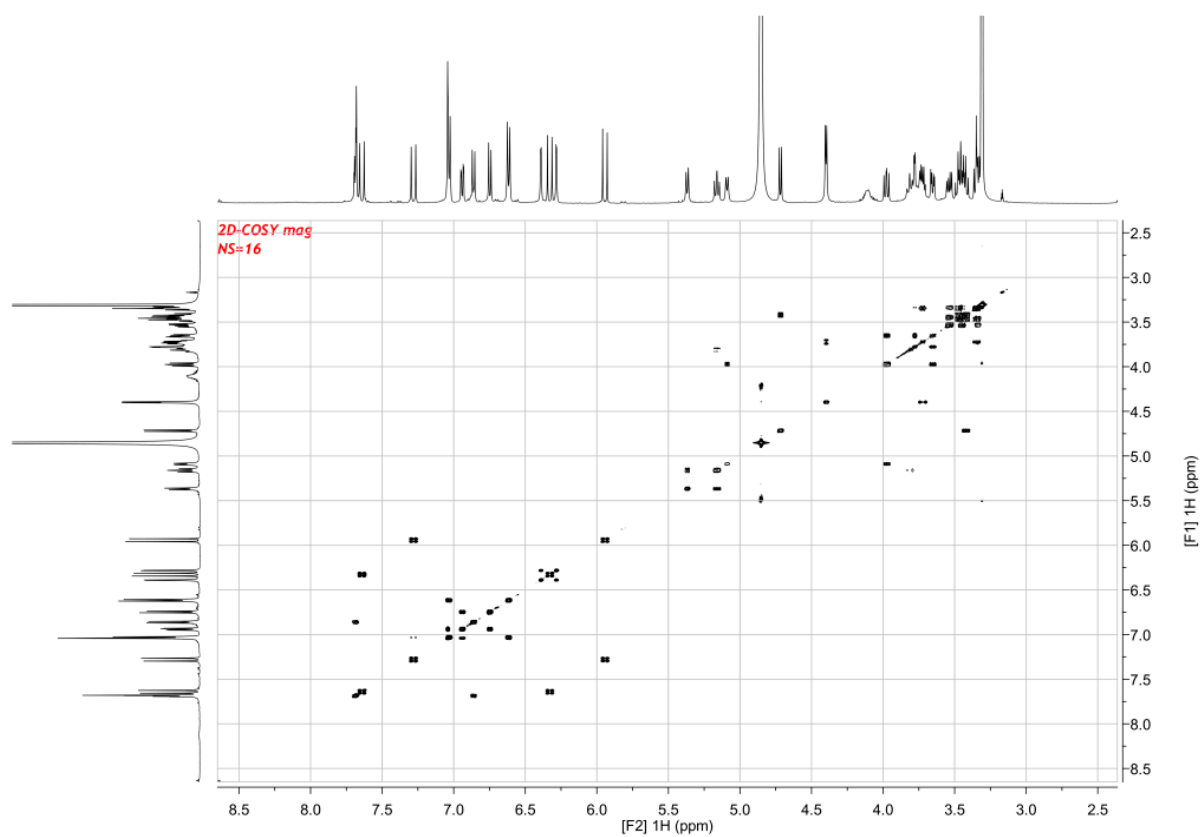

**Figure S146.** 2D TOCSY NMR spectrum of compound **14** (methanol-*d*<sub>4</sub>, 500.18 MHz).

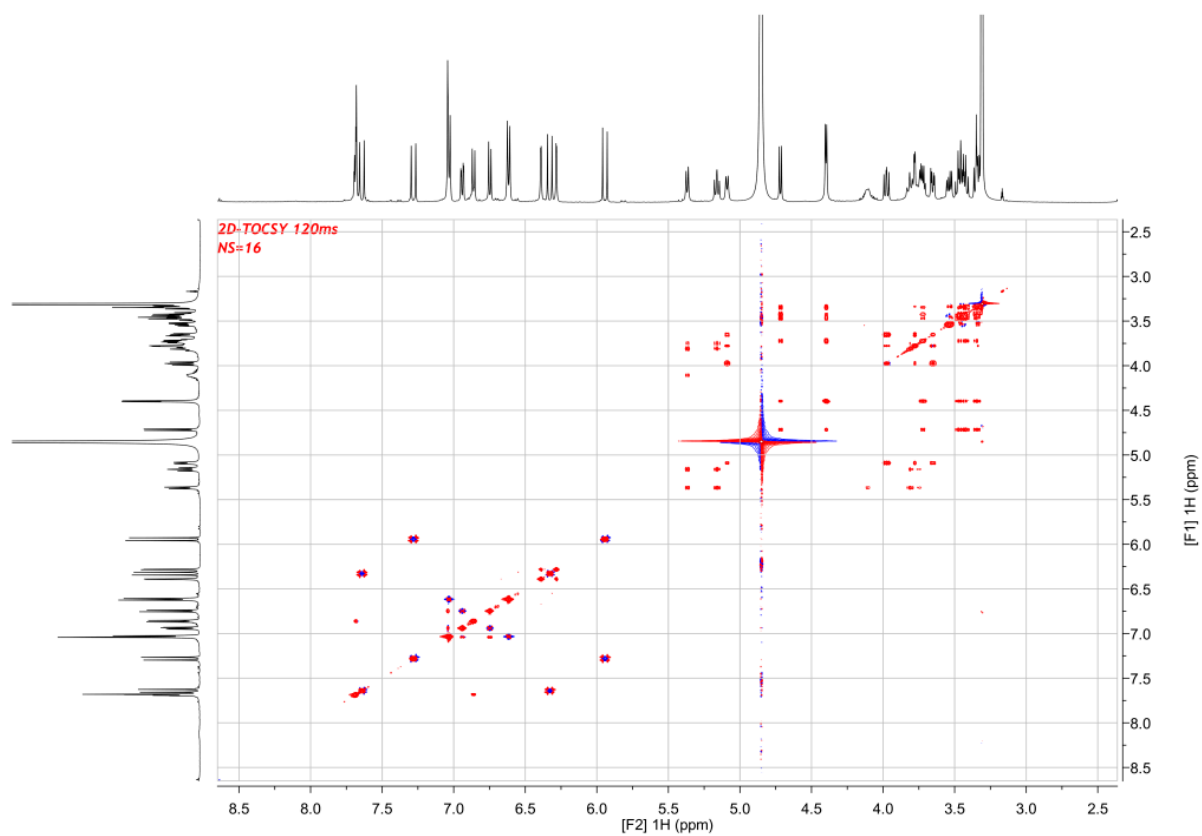

**Figure S147.** 2D ROESY NMR spectrum of compound **14** (methanol- $d_4$ , 500.18 MHz).

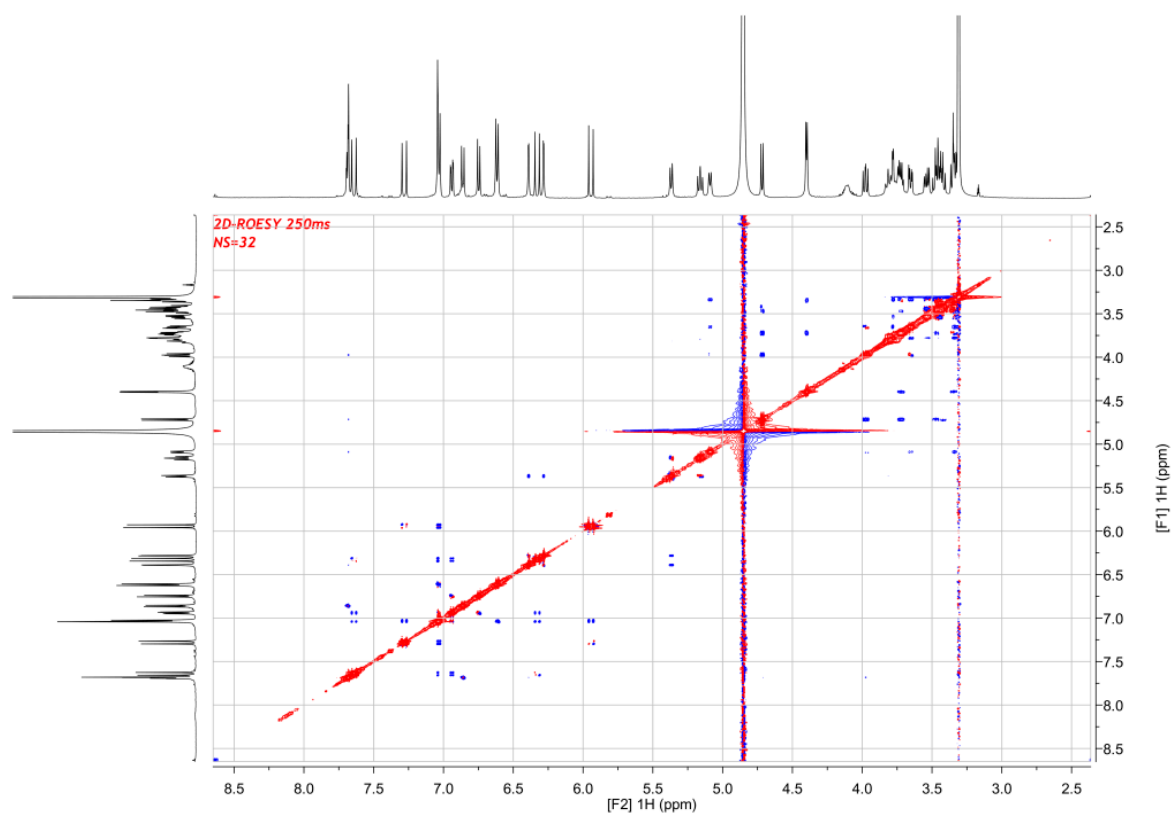

**Figure S148.** 2D g-HSQC-NMR spectrum of compound **14** (methanol- $d_4$ , 500.18 MHz, 125.77 MHz).

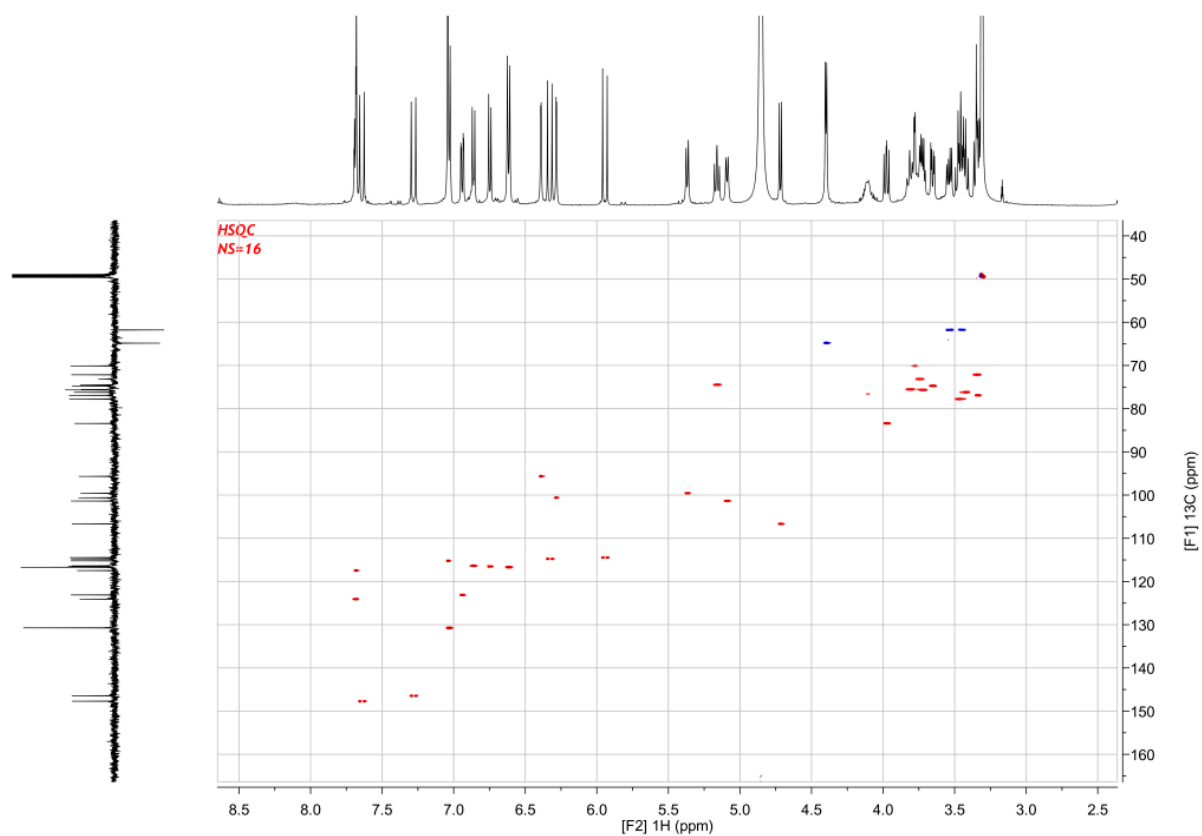



**Figure S149.** 2D g-HSQC-TOCSY NMR spectrum of compound **14** (methanol- $d_4$ , 500.18 MHz, 125.77 MHz).

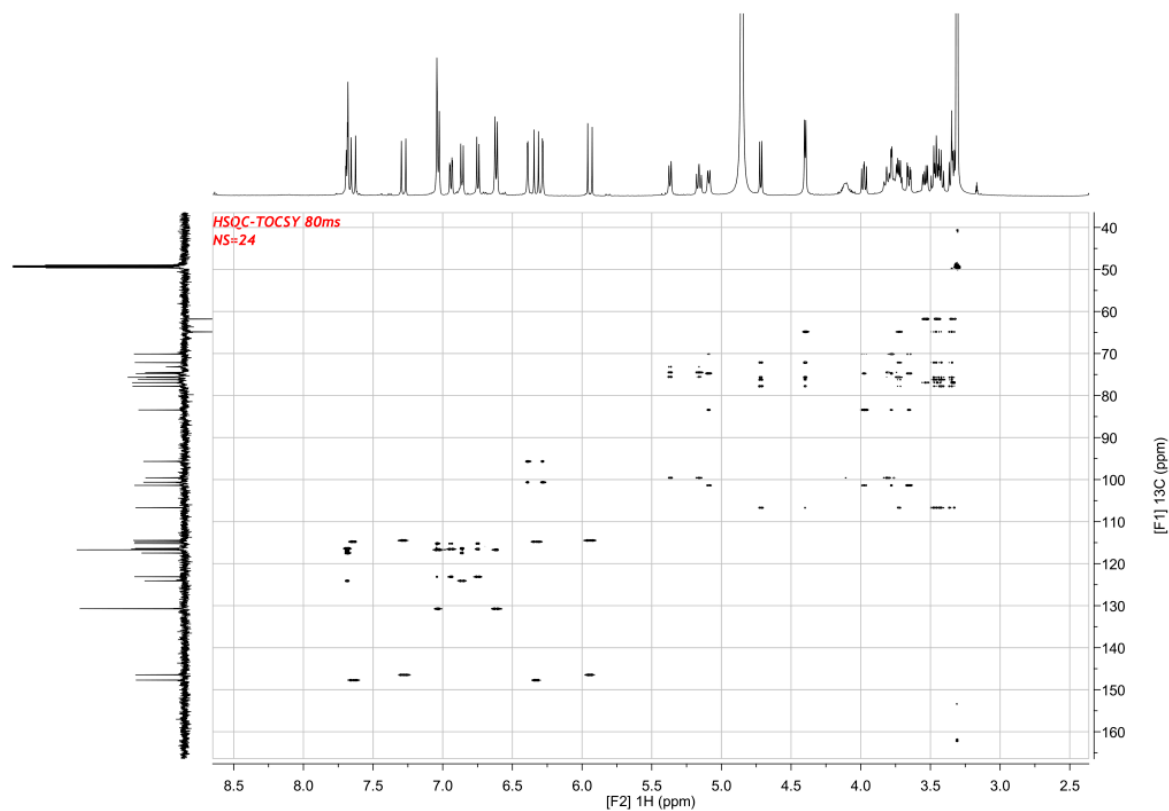

**Figure S150.** 2D g-HMBC-NMR spectrum of compound **14** (methanol- $d_4$ , 500.18 MHz, 125.77 MHz).

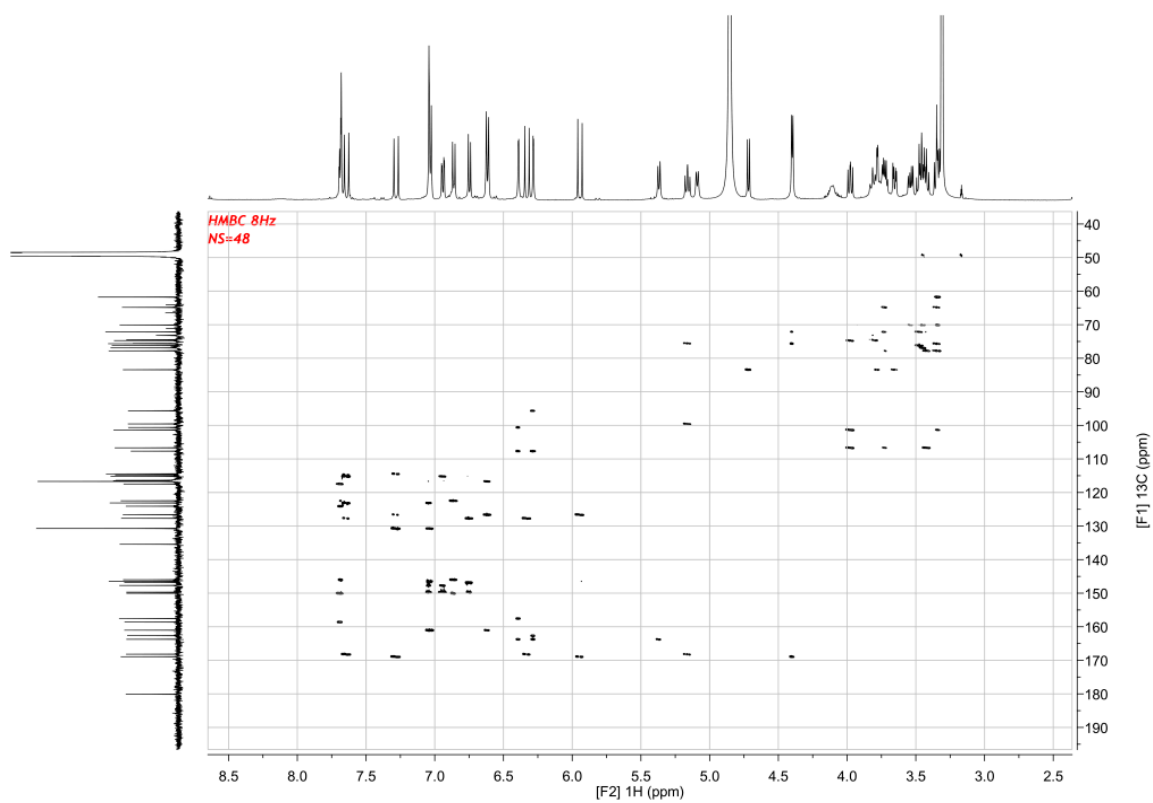

**Figure S151.** 1D TOCSY and 1D ROESY NMR subspectra of H-1(*7-O*- $\beta$ -GlcA) in compound **14** (methanol-*d*<sub>4</sub>, 500.18 MHz).

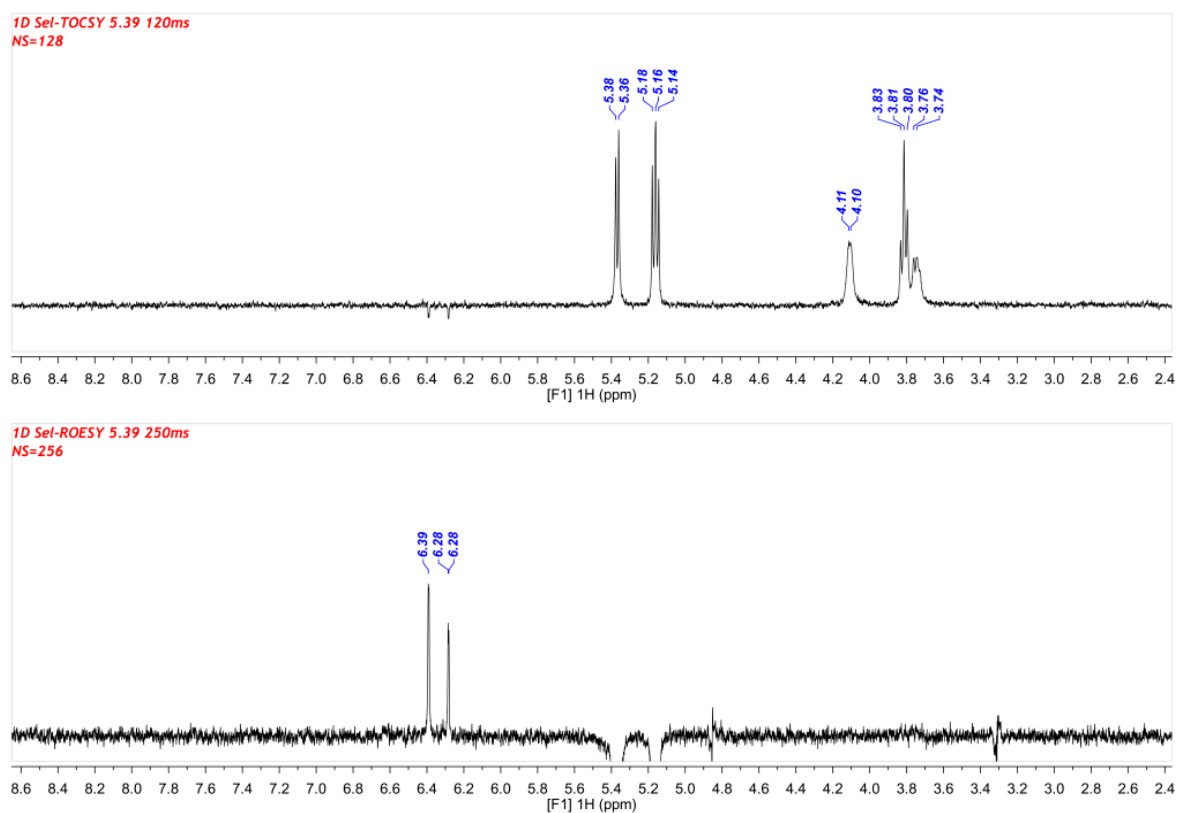

**Figure S152.** 1D TOCSY and 1D ROESY NMR subspectra of H-1(*3-O*- $\beta$ -Gal) in compound **14** (methanol-*d*<sub>4</sub>, 500.18 MHz).

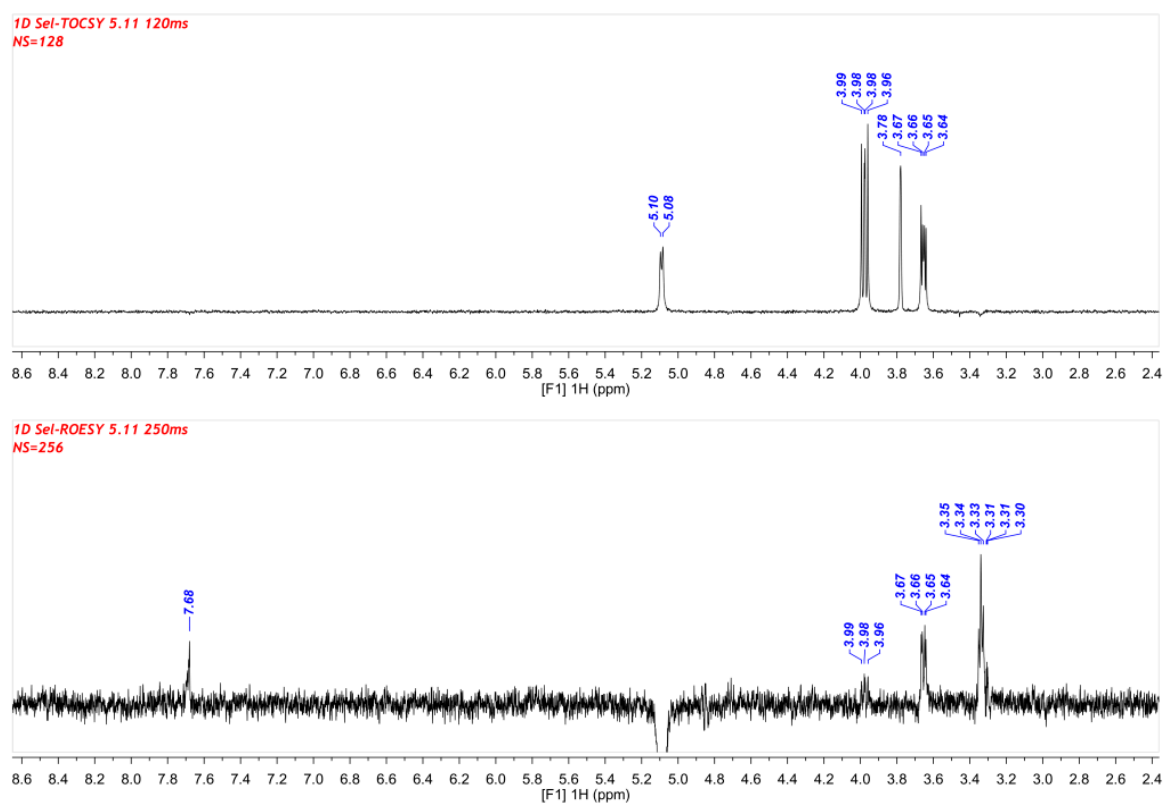

**Figure S153.** 1D TOCSY and 1D ROESY NMR subspectra of H-1(<sub>2</sub>Gal-*O*-β-Glc) in compound **14** (methanol-*d*<sub>4</sub>, 500.18 MHz).

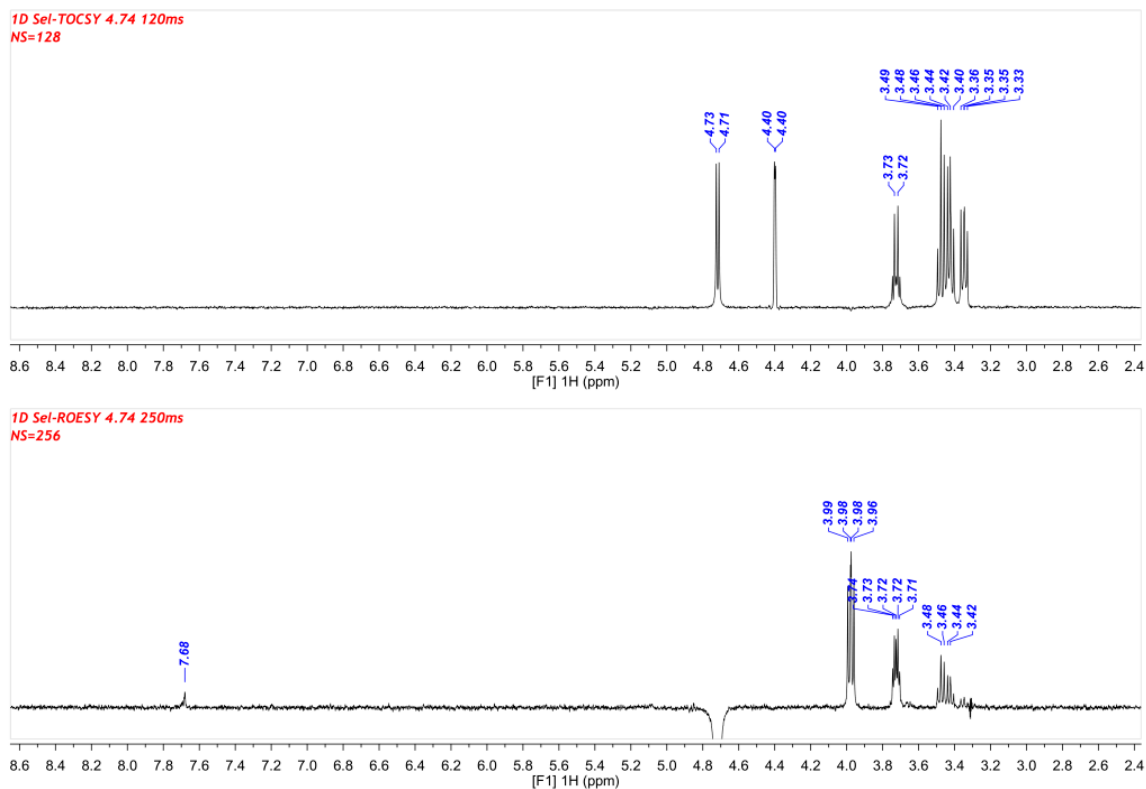

## Compound 15

**Figure S154.** 1D <sup>1</sup>H-NMR spectrum of compound **15** (methanol-*d*<sub>4</sub>, 500.18 MHz).

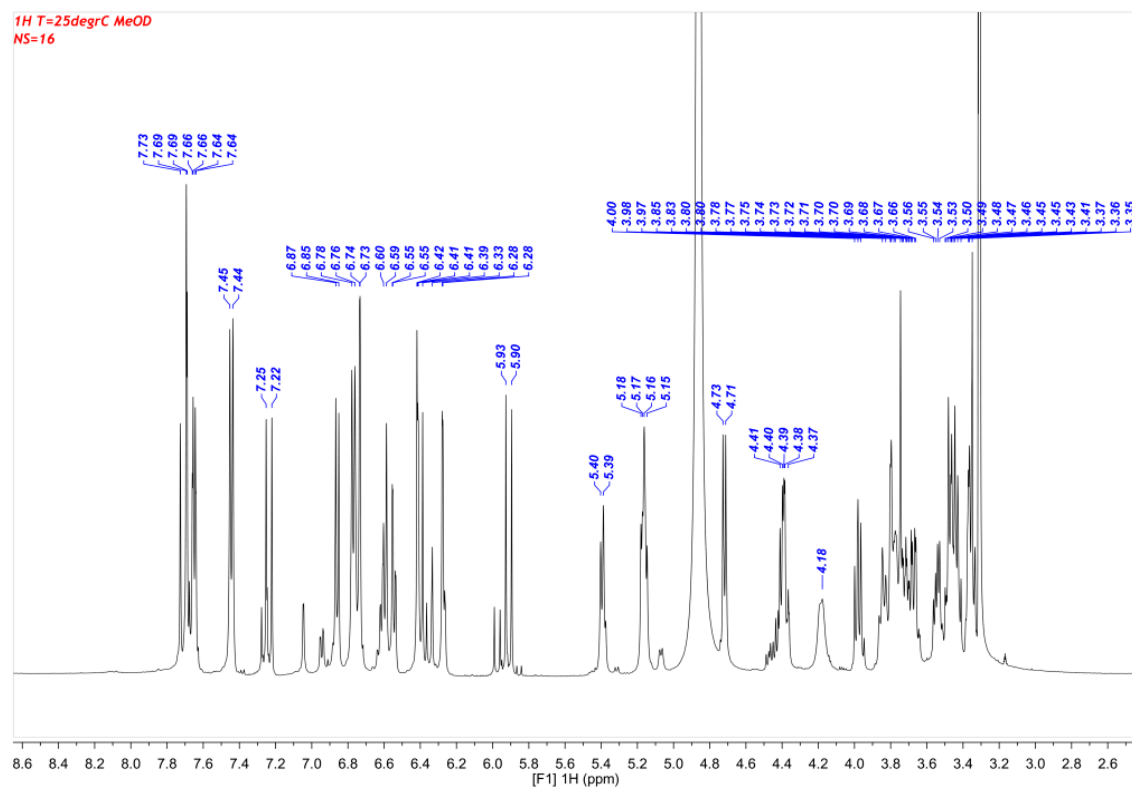

**Figure S155.** 1D  $^{13}\text{C}$ -NMR spectra (1H decoupled and DEPT-135) of compound **15** (methanol- $d_4$ , 125.77 MHz).

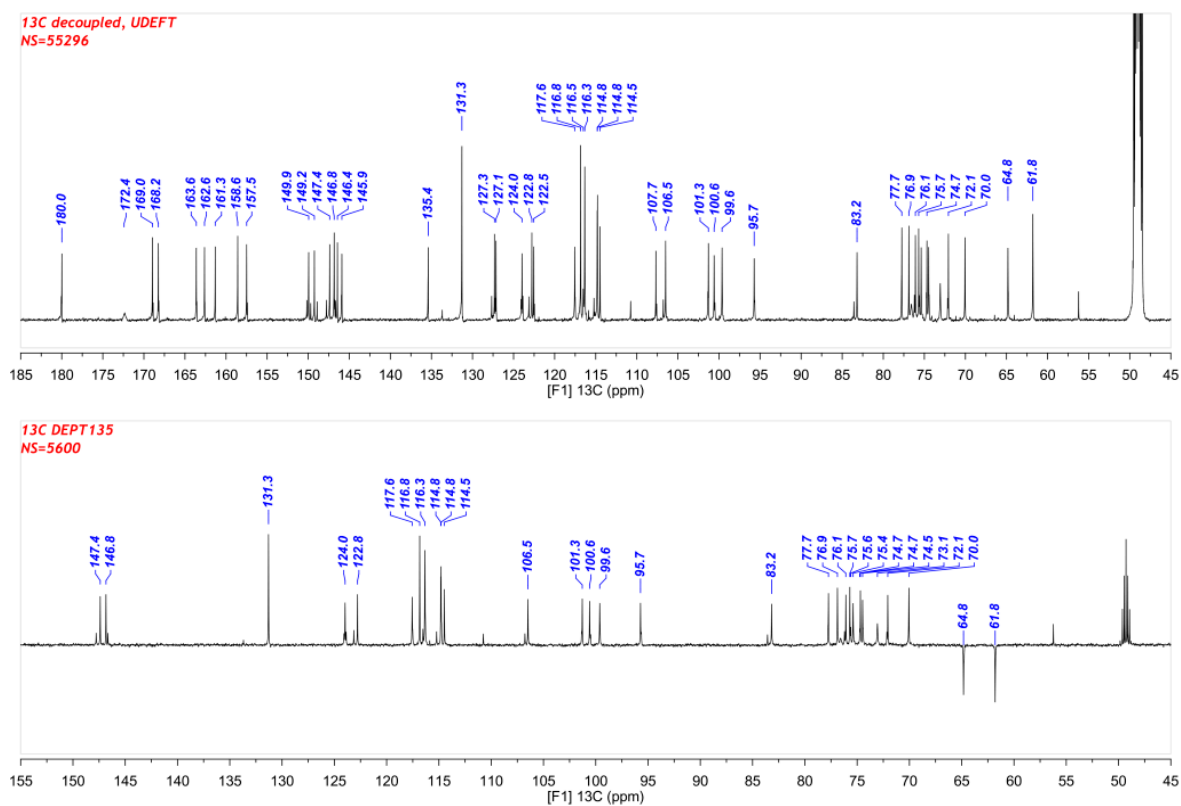

**Figure S156.** 2D g-COSY NMR spectrum of compound **15** (methanol- $d_4$ , 500.18 MHz).

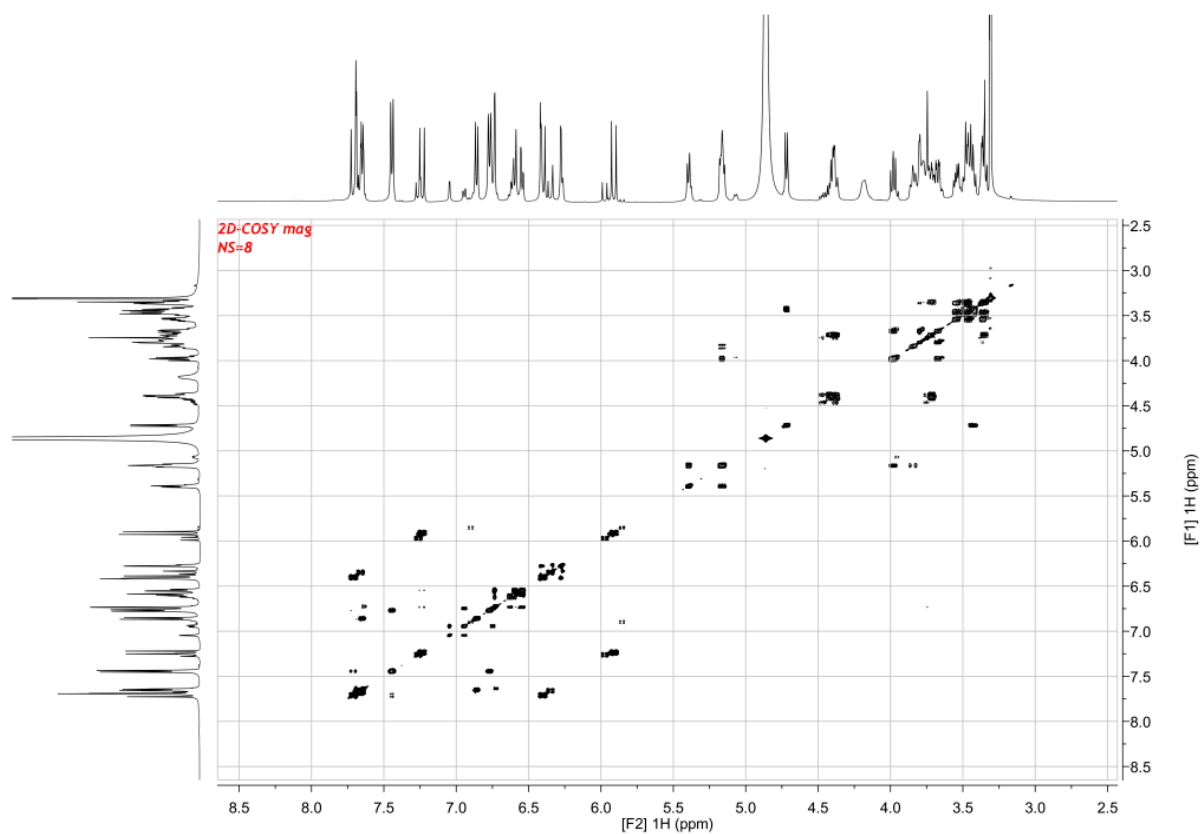

**Figure S157.** 2D TOCSY NMR spectrum of compound **15** (methanol-*d*<sub>4</sub>, 500.18 MHz).

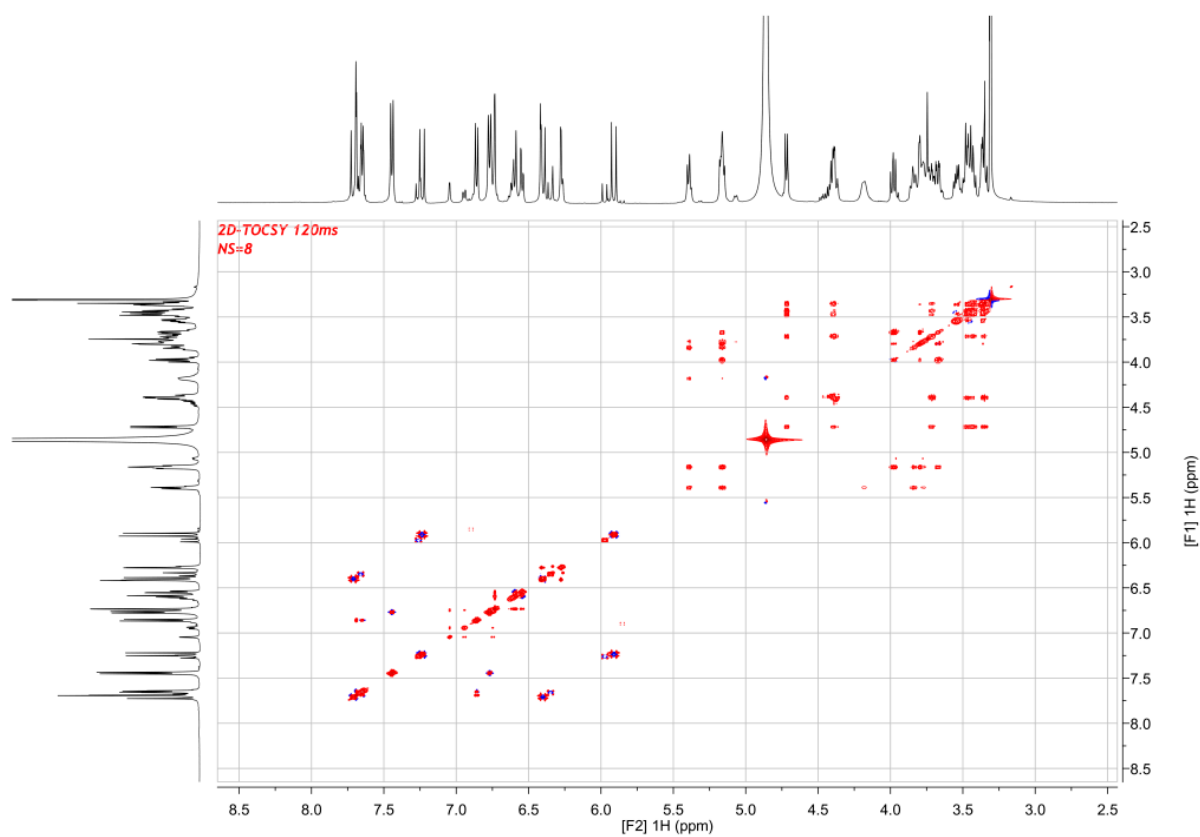

**Figure S158.** 2D ROESY NMR spectrum of compound **15** (methanol-*d*<sub>4</sub>, 500.18 MHz).

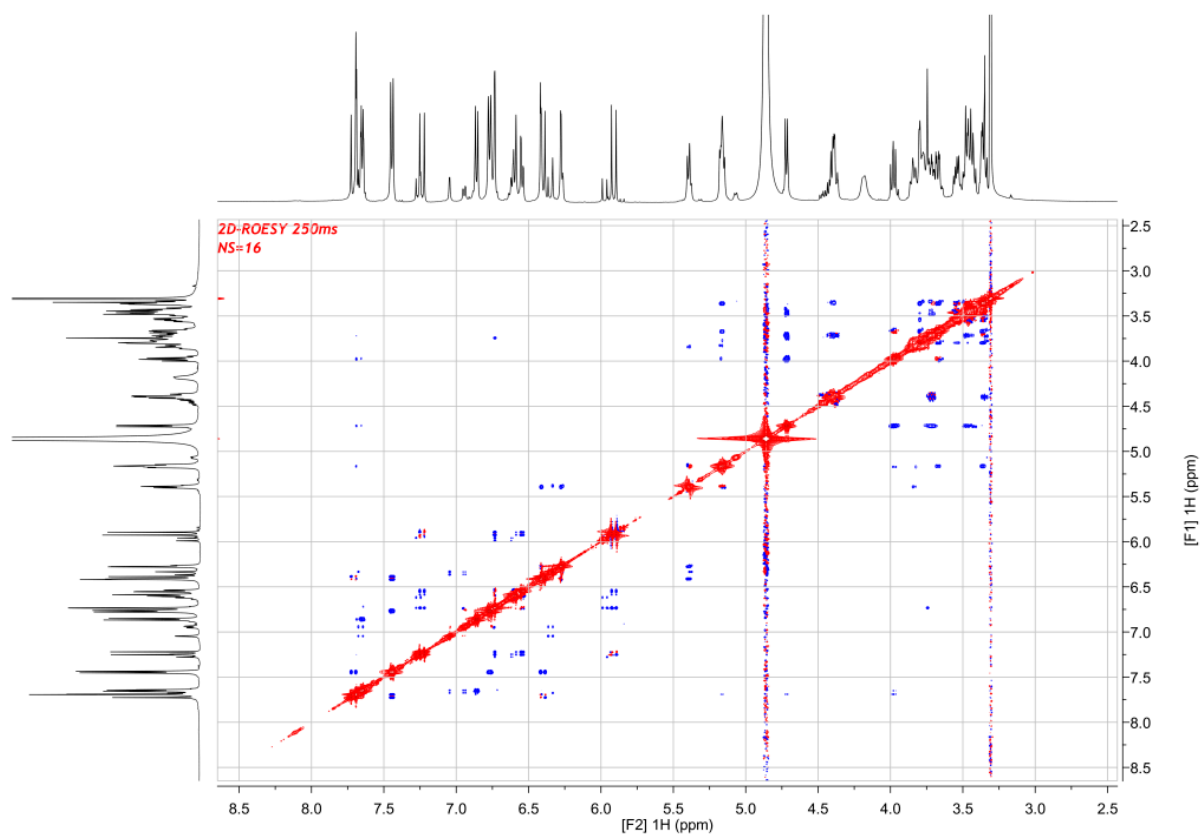

**Figure S159.** 2D g-HSQC-NMR spectrum of compound **15** (methanol- $d_4$ , 500.18 MHz, 125.77 MHz).

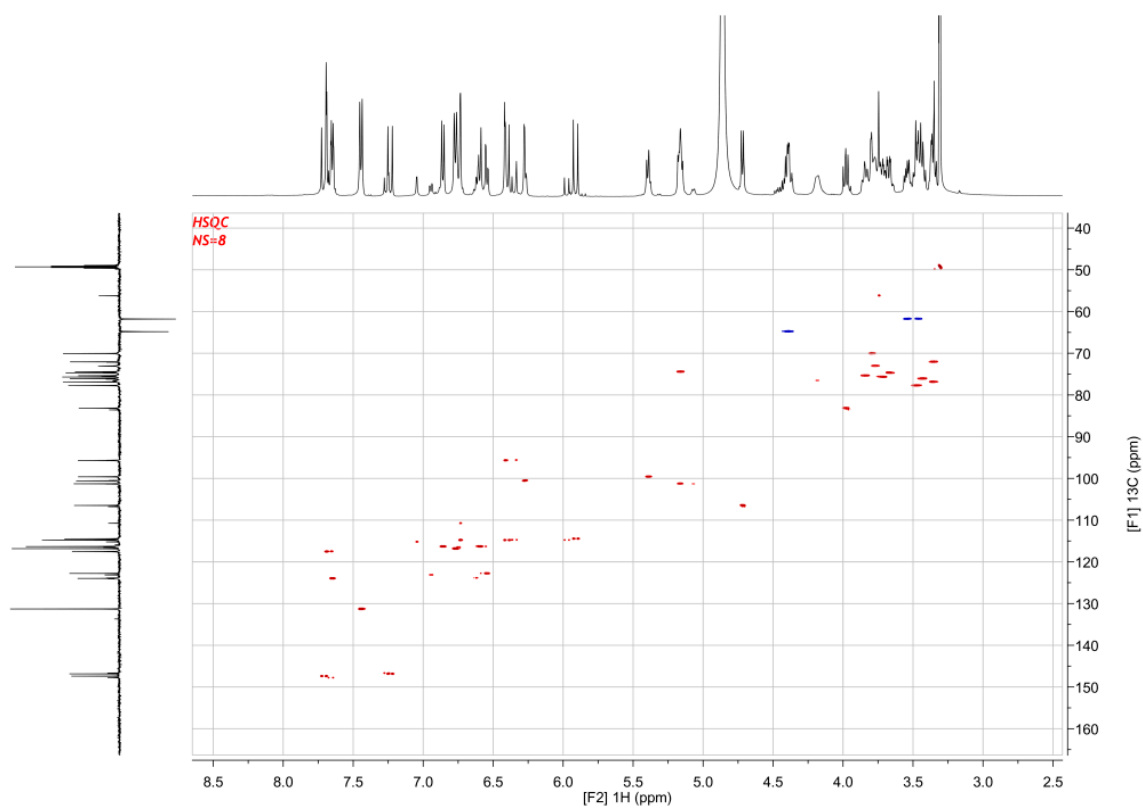

**Figure S160.** 2D g-HSQC-TOCSY NMR spectrum of compound **15** (methanol- $d_4$ , 500.18 MHz, 125.77 MHz).

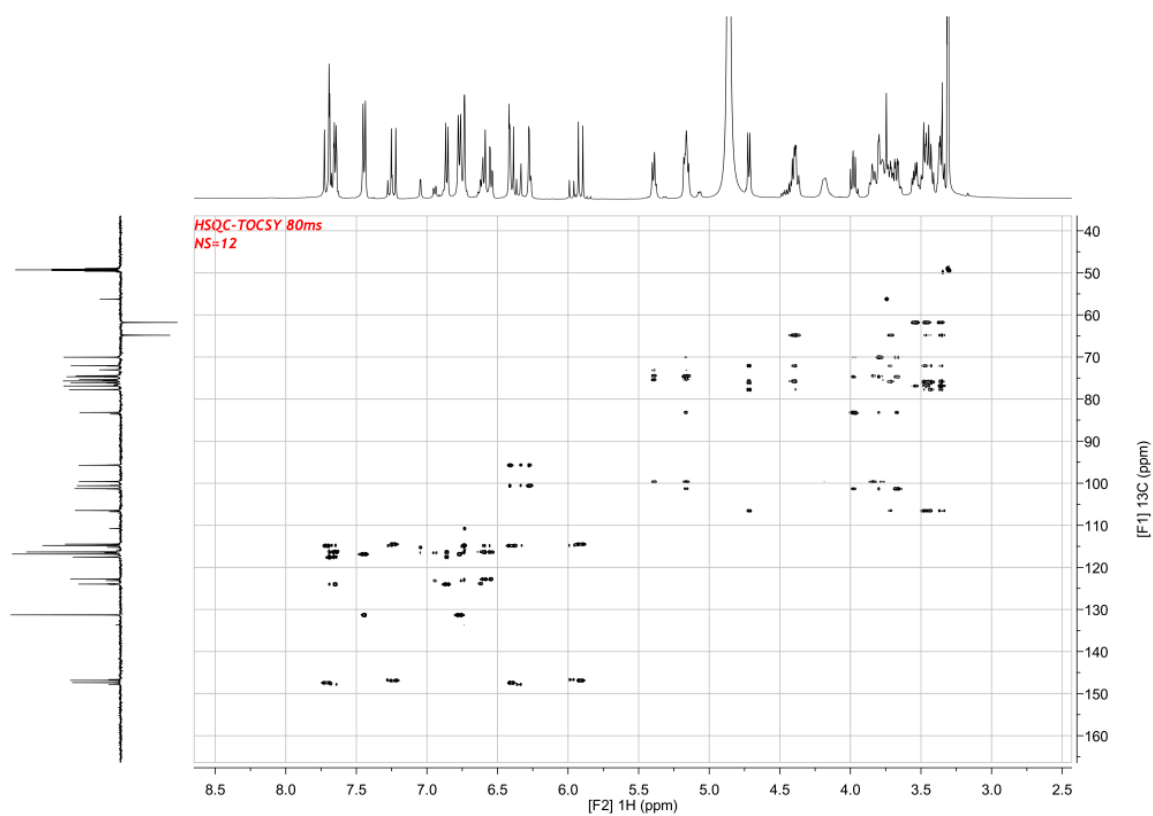

**Figure S161.** 2D g-HMBC-NMR spectrum of compound **15** (methanol- $d_4$ , 500.18 MHz, 125.77 MHz).

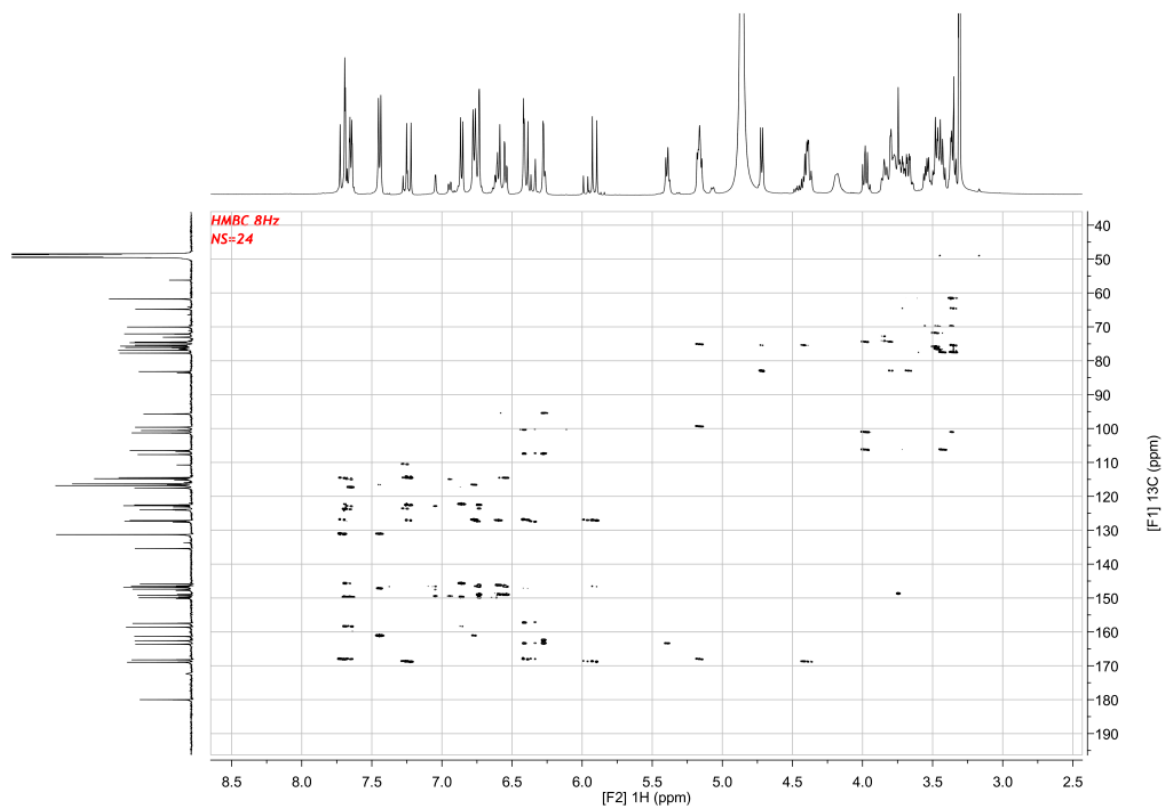

**Figure S162.** 1D TOCSY and 1D ROESY NMR subspectra of H-1( $7-O-\beta$ -GlcA) in compound **15** (methanol- $d_4$ , 500.18 MHz).

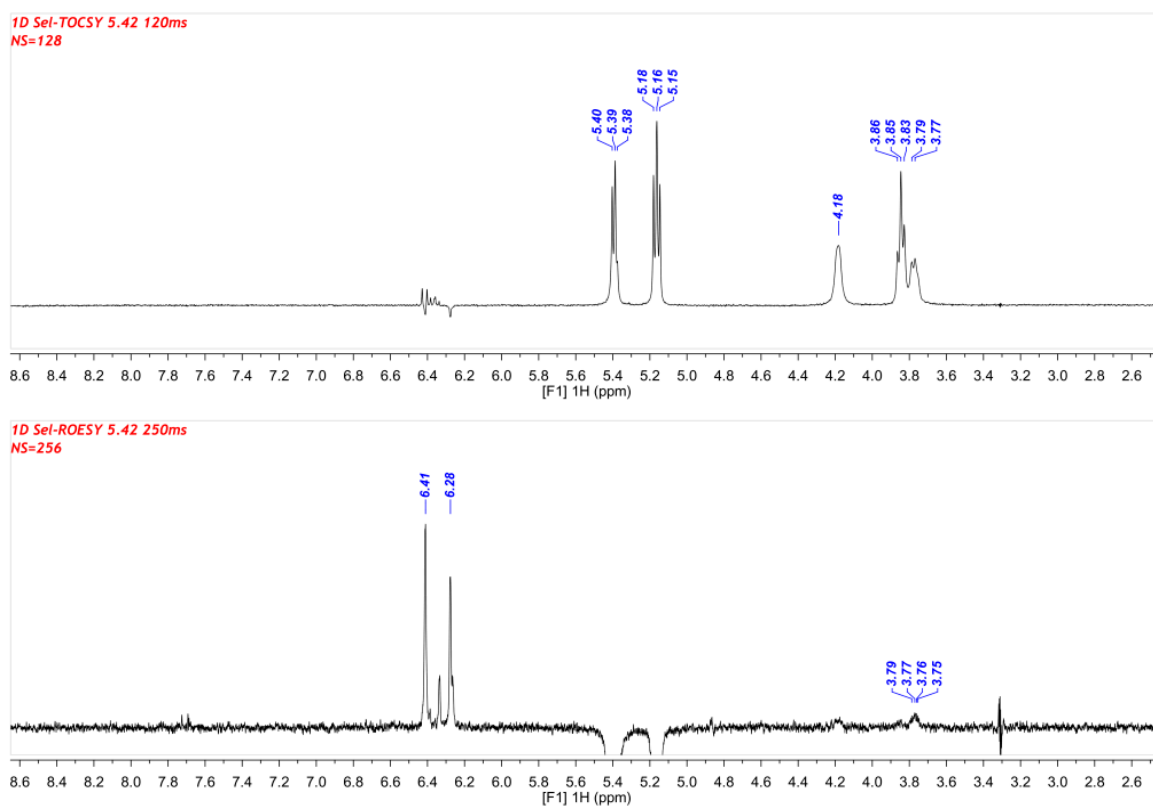

**Figure S163.** 1D TOCSY NMR subspectrum of H-2(<sub>3</sub>-O-β-Gal) in compound **15** (methanol-*d*<sub>4</sub>, 500.18 MHz).

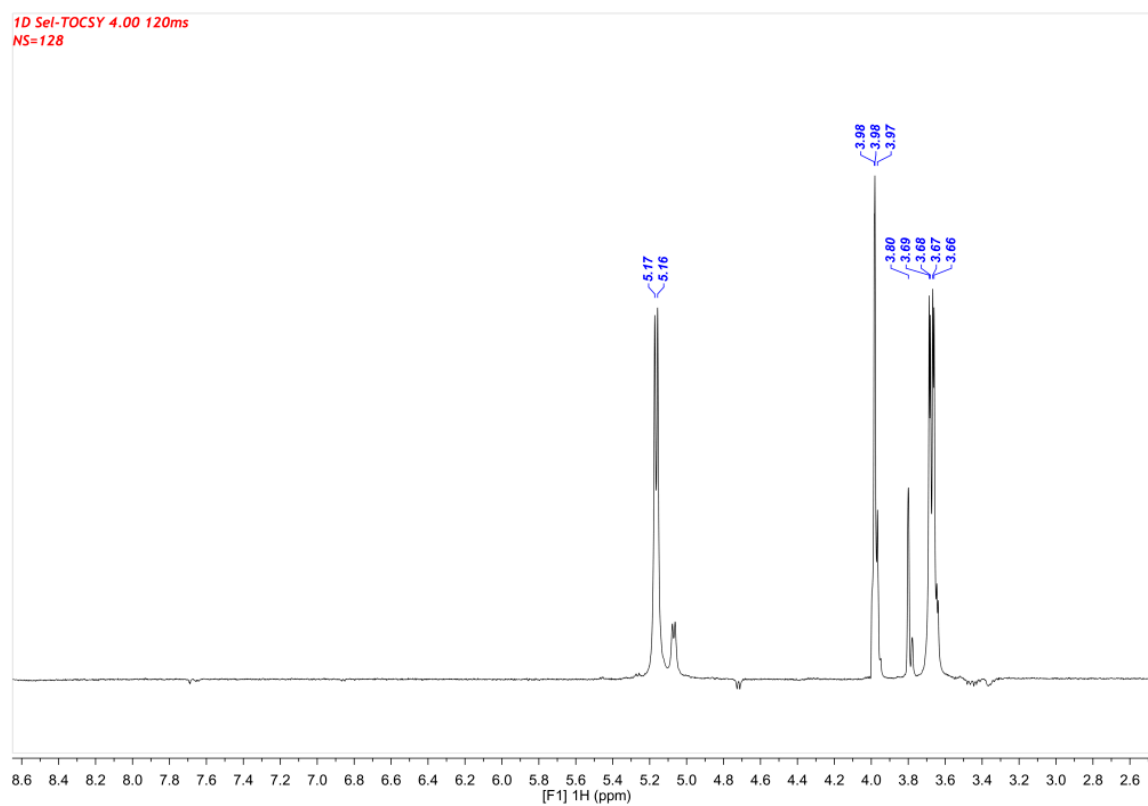

**Figure S164.** 1D TOCSY and 1D ROESY NMR subspectra of H-1(<sub>2</sub><sup>Gal</sup>-O-β-Glc) in compound **15** (methanol-*d*<sub>4</sub>, 500.18 MHz).

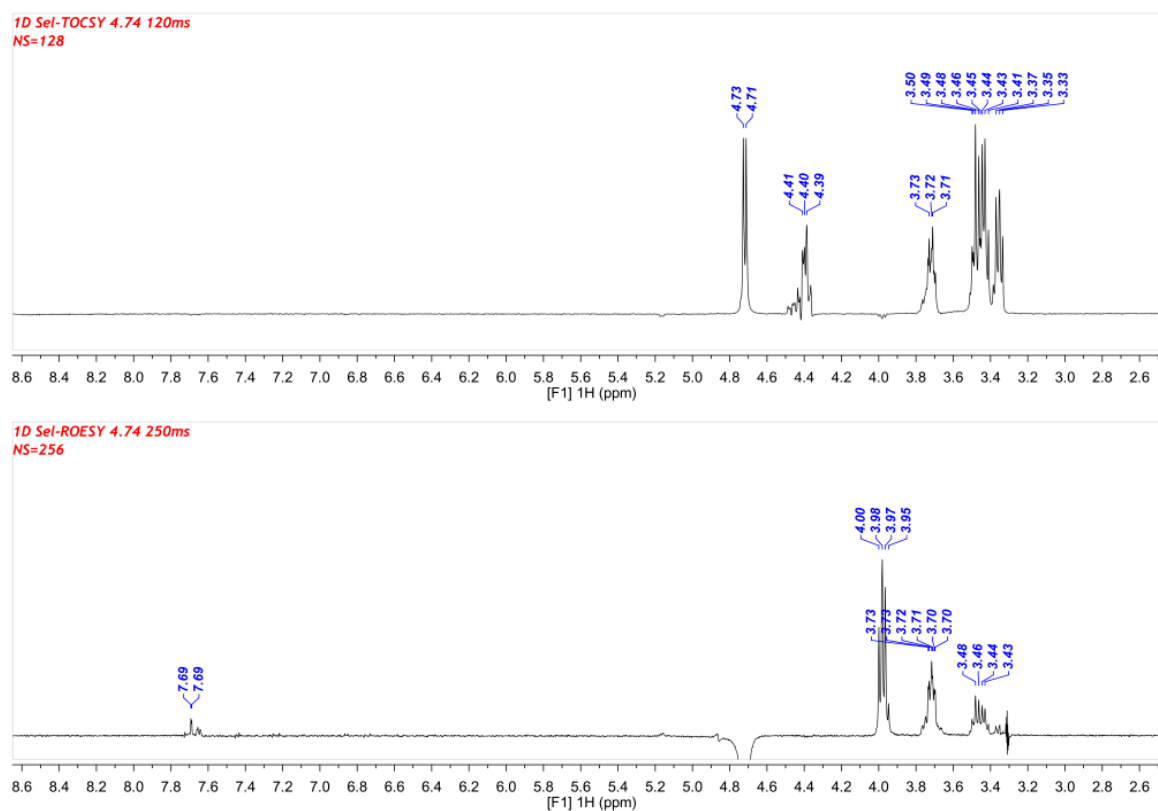



## Compound 16

**Figure S165.** 1D  $^1\text{H}$ -NMR spectrum of compound **16** (methanol- $d_4$ , 500.18 MHz).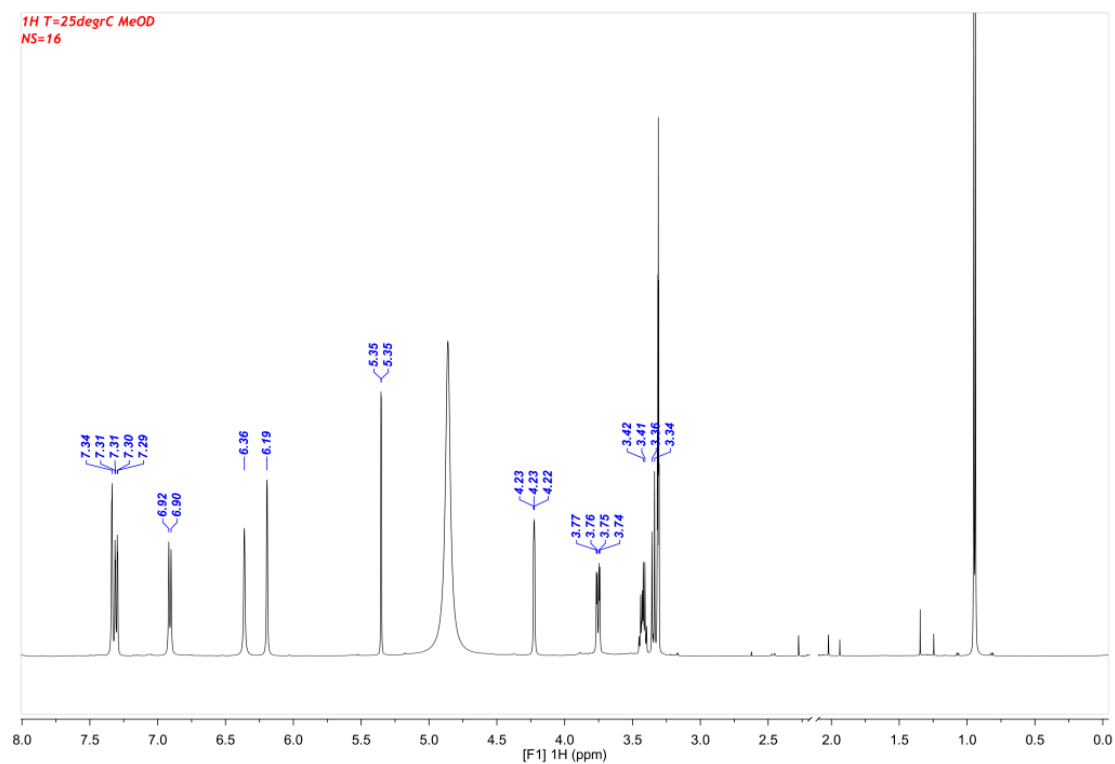**Figure S166.** 1D  $^{13}\text{C}$ -NMR spectra ( $^1\text{H}$  decoupled and DEPT-135) of compound **16** (methanol- $d_4$ , 125.77 MHz).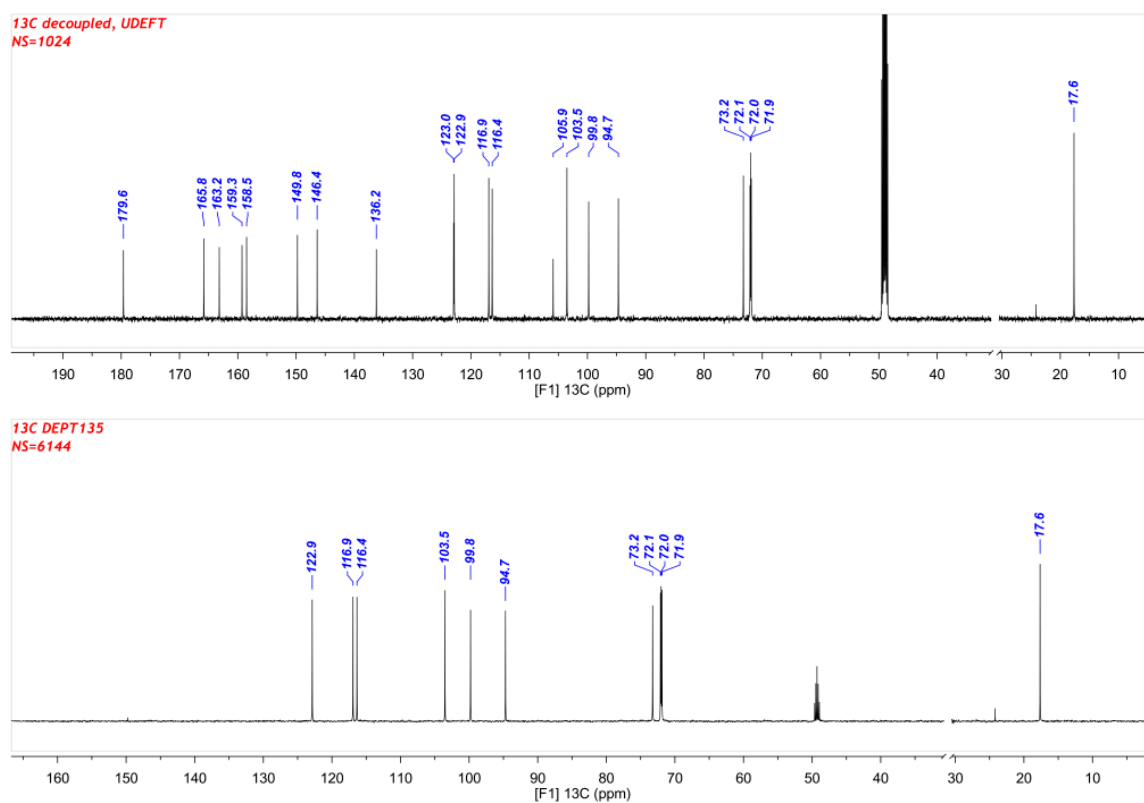

**Figure S167.** 2D g-COSY NMR spectrum of compound **16** (methanol-*d*<sub>4</sub>, 500.18 MHz).

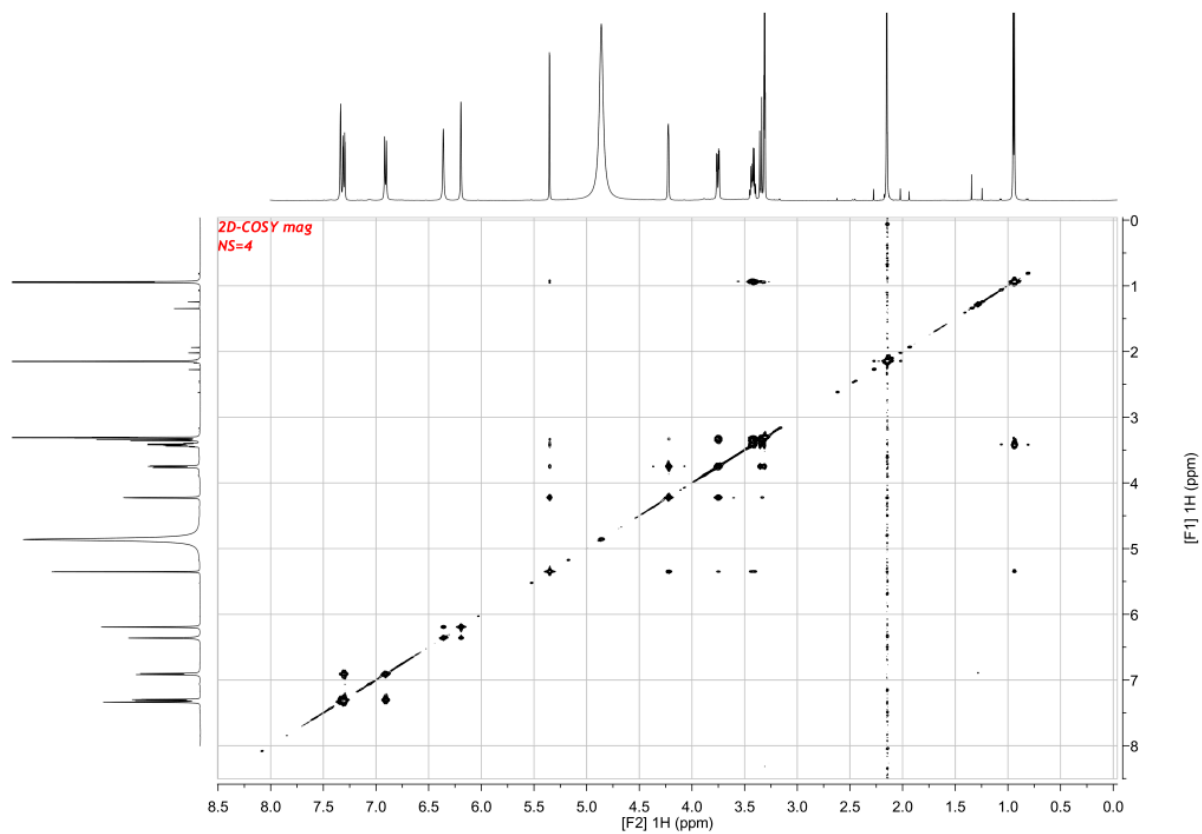

**Figure S168.** 2D ROESY NMR spectrum of compound **16** (methanol-*d*<sub>4</sub>, 500.18 MHz).

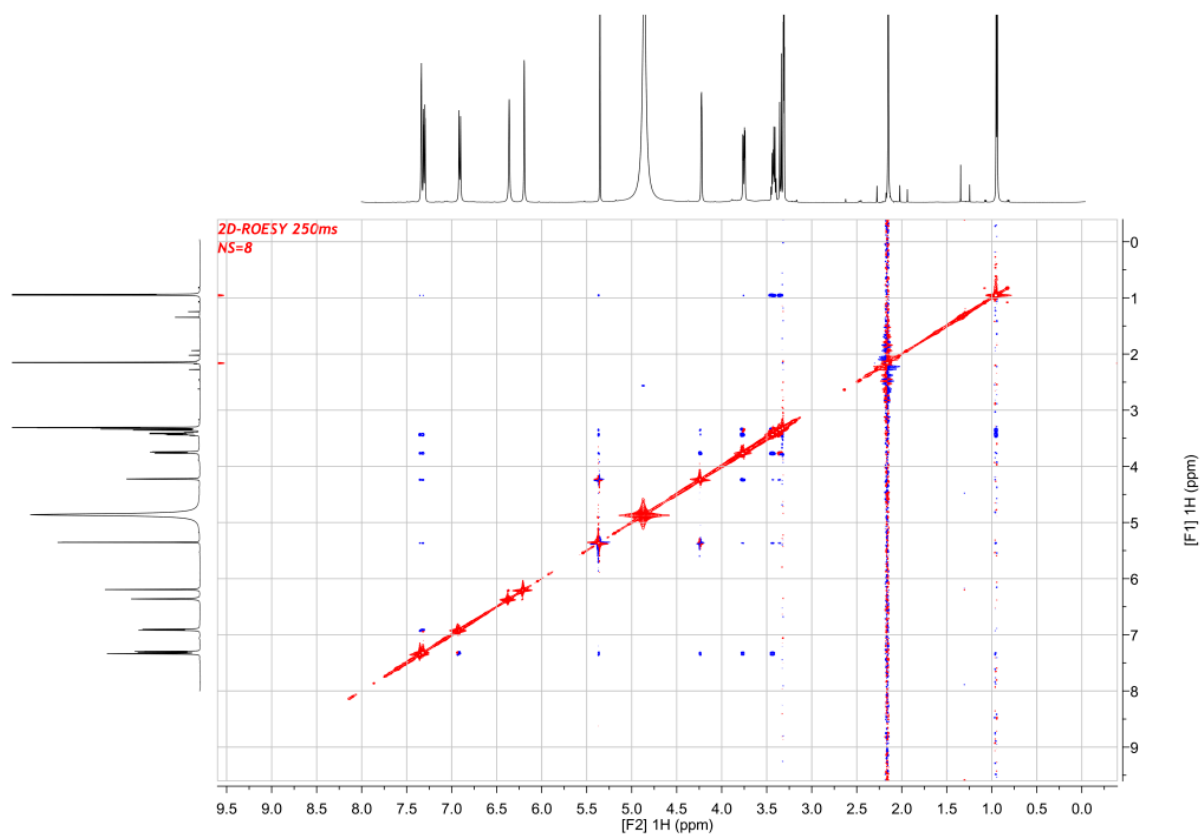

**Figure S169.** 2D *g*-HSQC-NMR spectrum of compound **16** (methanol-*d*<sub>4</sub>, 500.18 MHz, 125.77 MHz).

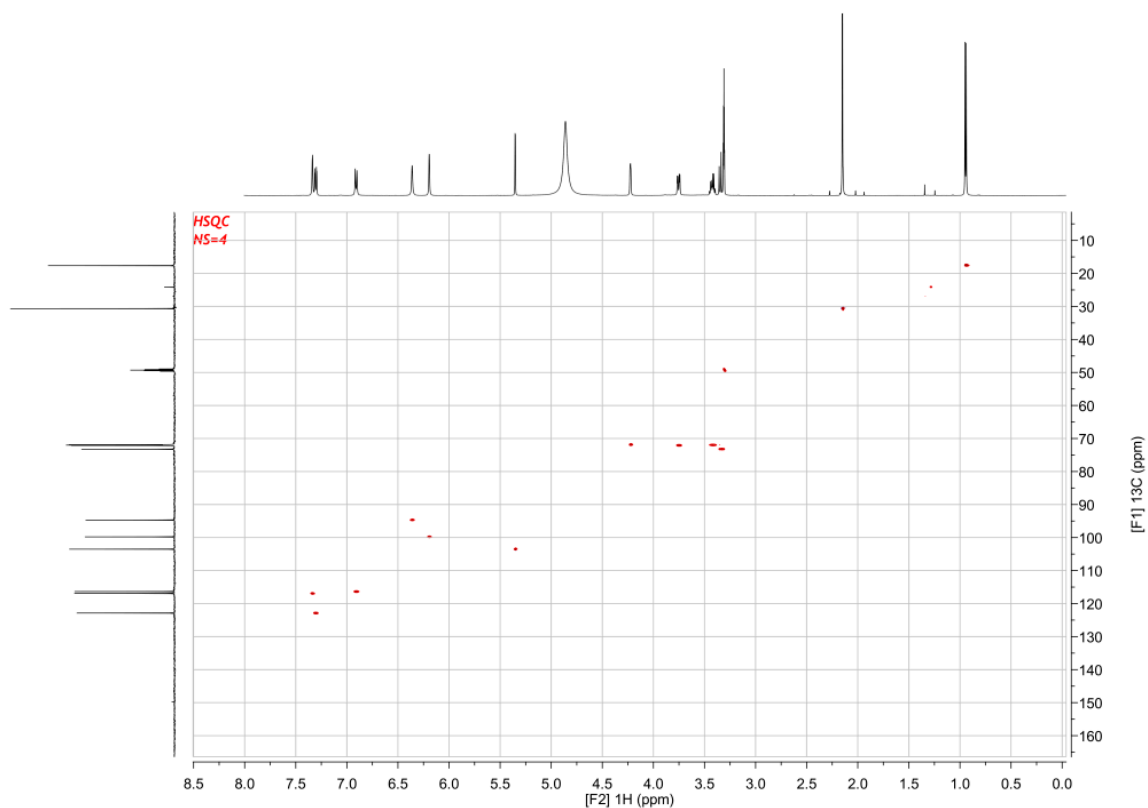

**Figure S170.** 2D *g*-HMBC-NMR spectrum of compound **16** (methanol-*d*<sub>4</sub>, 500.18 MHz, 125.77 MHz).

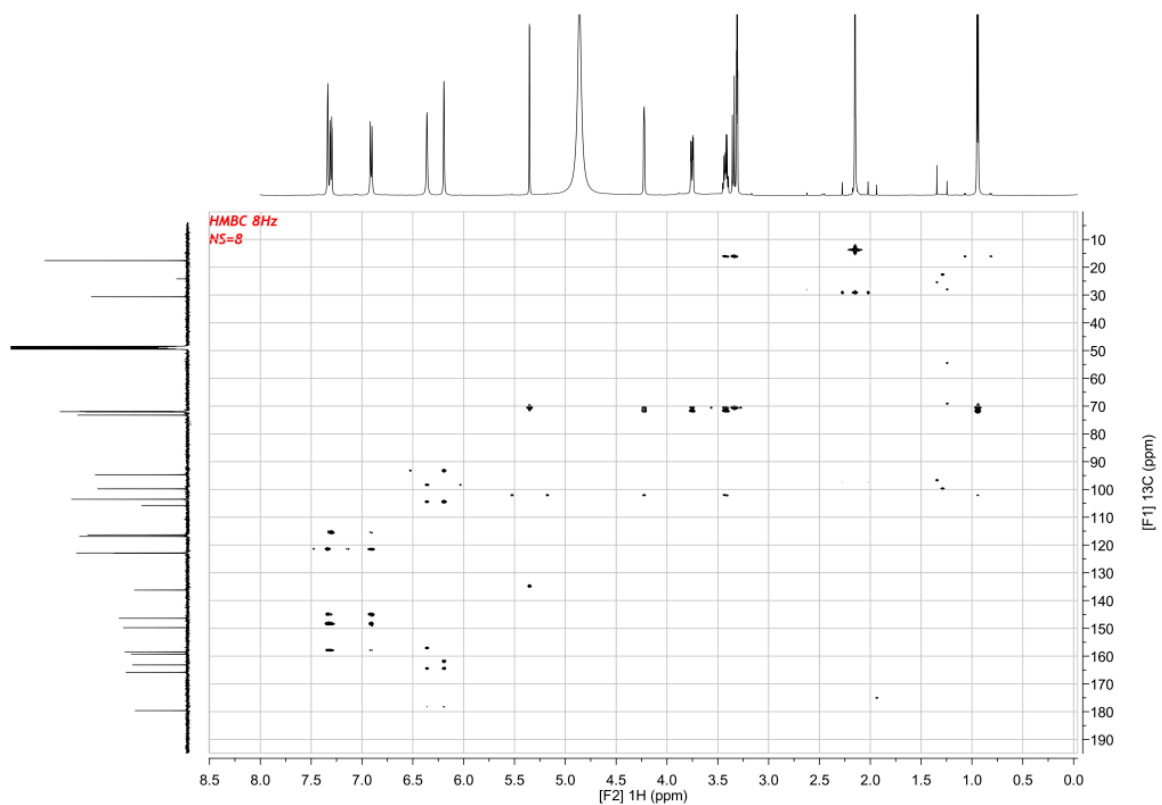

**Figure S171.** 1D TOCSY and 1D ROESY NMR subspectra of H-1(*3-O- $\alpha$ -Rha*) and H-6(*3-O- $\alpha$ -Rha*) in compound **16** (methanol-*d*<sub>4</sub>, 500.18 MHz).

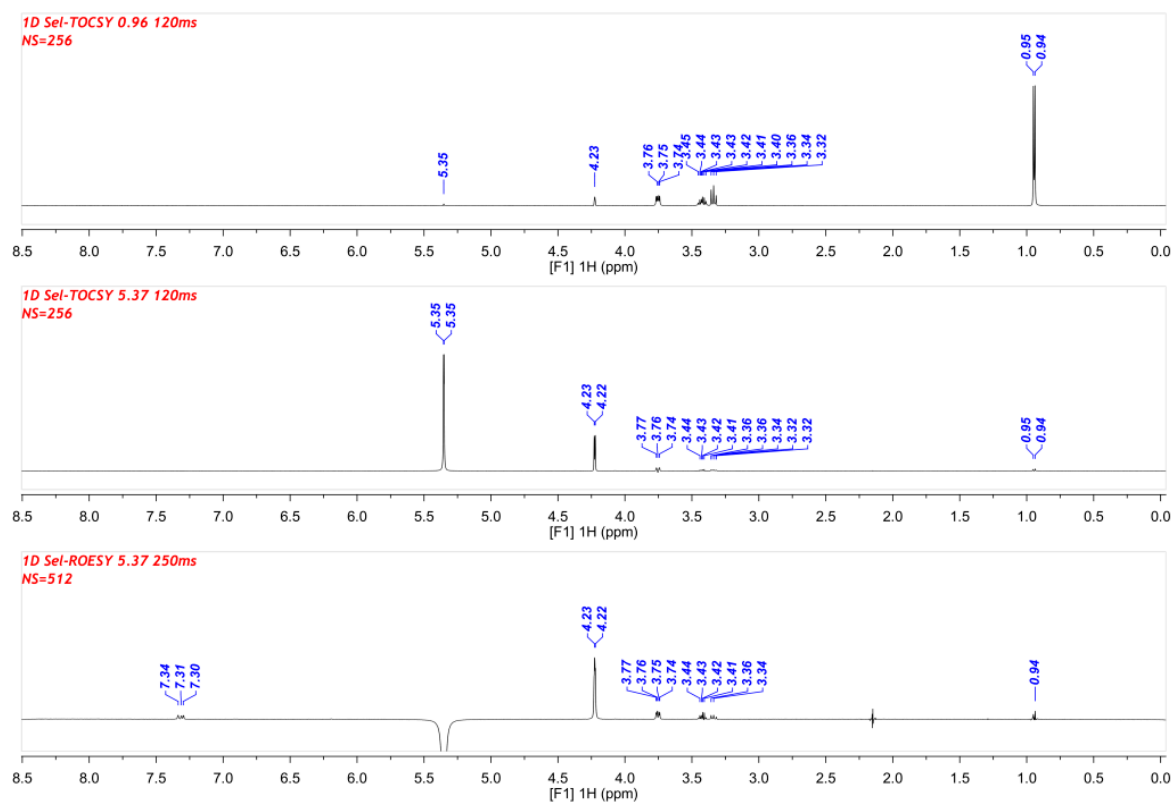

## Compound 17

**Figure S172.** 1D <sup>1</sup>H-NMR spectrum of compound **17** (methanol-*d*<sub>4</sub>, 500.18 MHz).

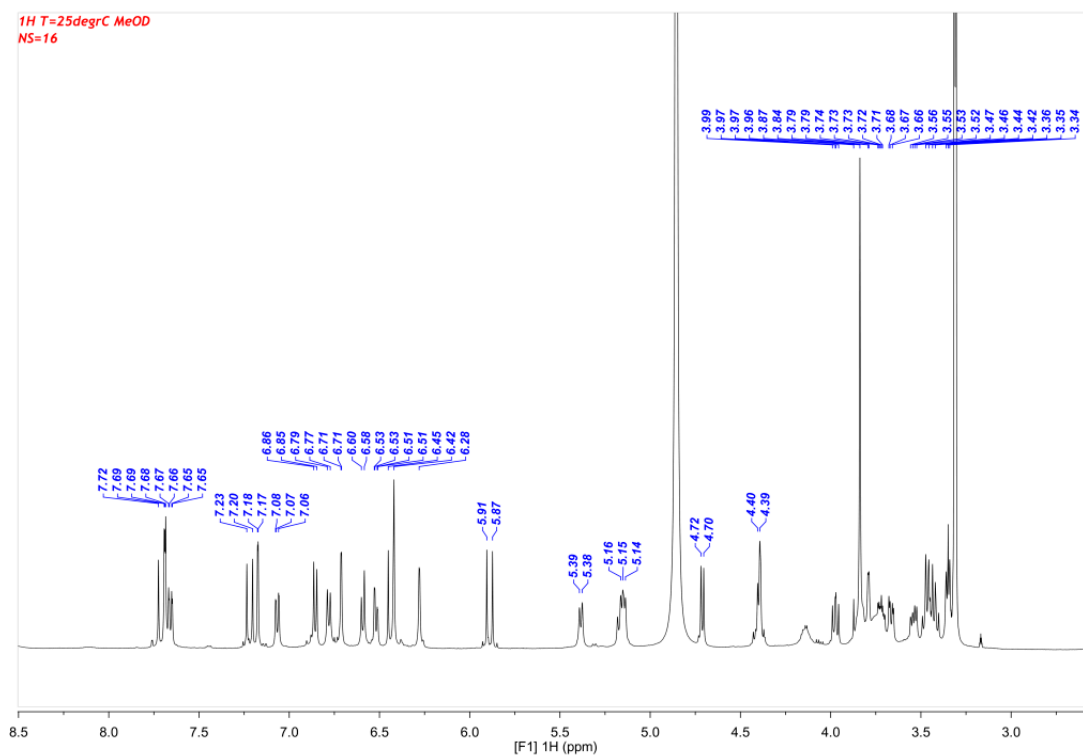

**Figure S173.** 1D  $^{13}\text{C}$ -NMR spectra (1H decoupled and DEPT-135) of compound **17** (methanol- $d_4$ , 125.77 MHz).

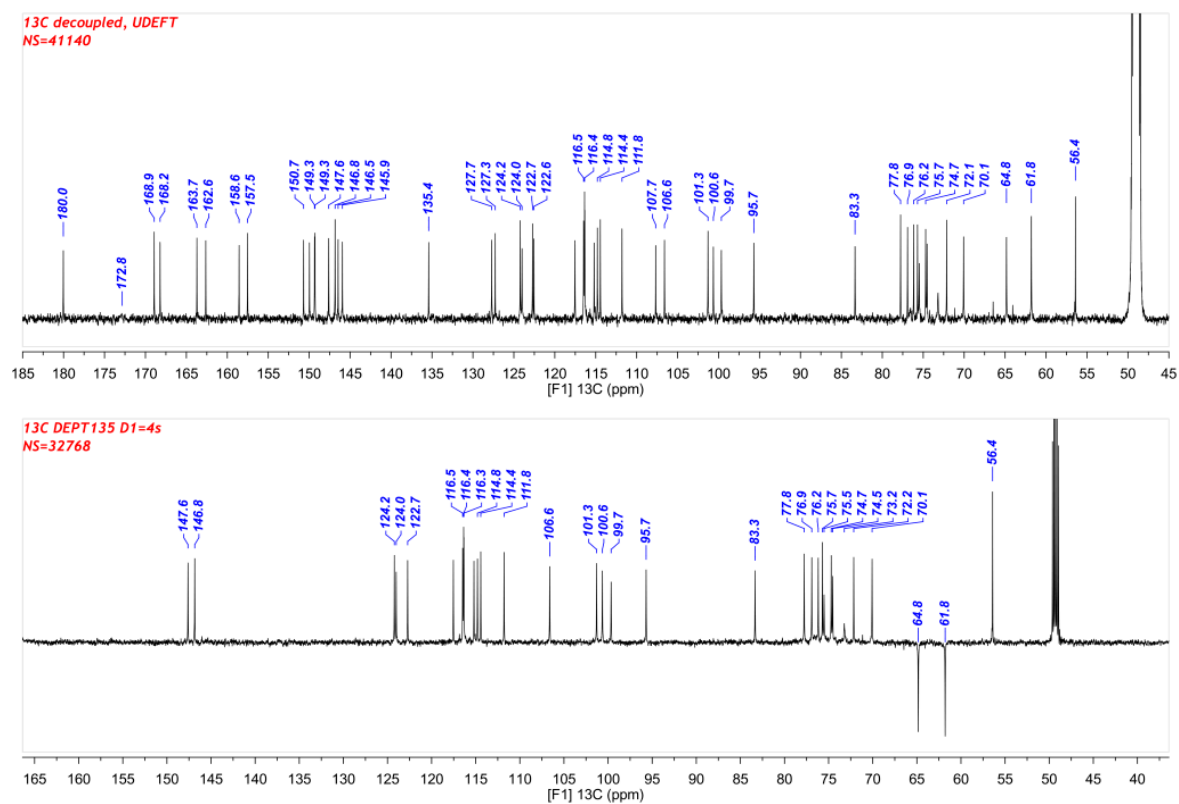

**Figure S174.** 2D g-COSY NMR spectrum of compound **17** (methanol- $d_4$ , 500.18 MHz).

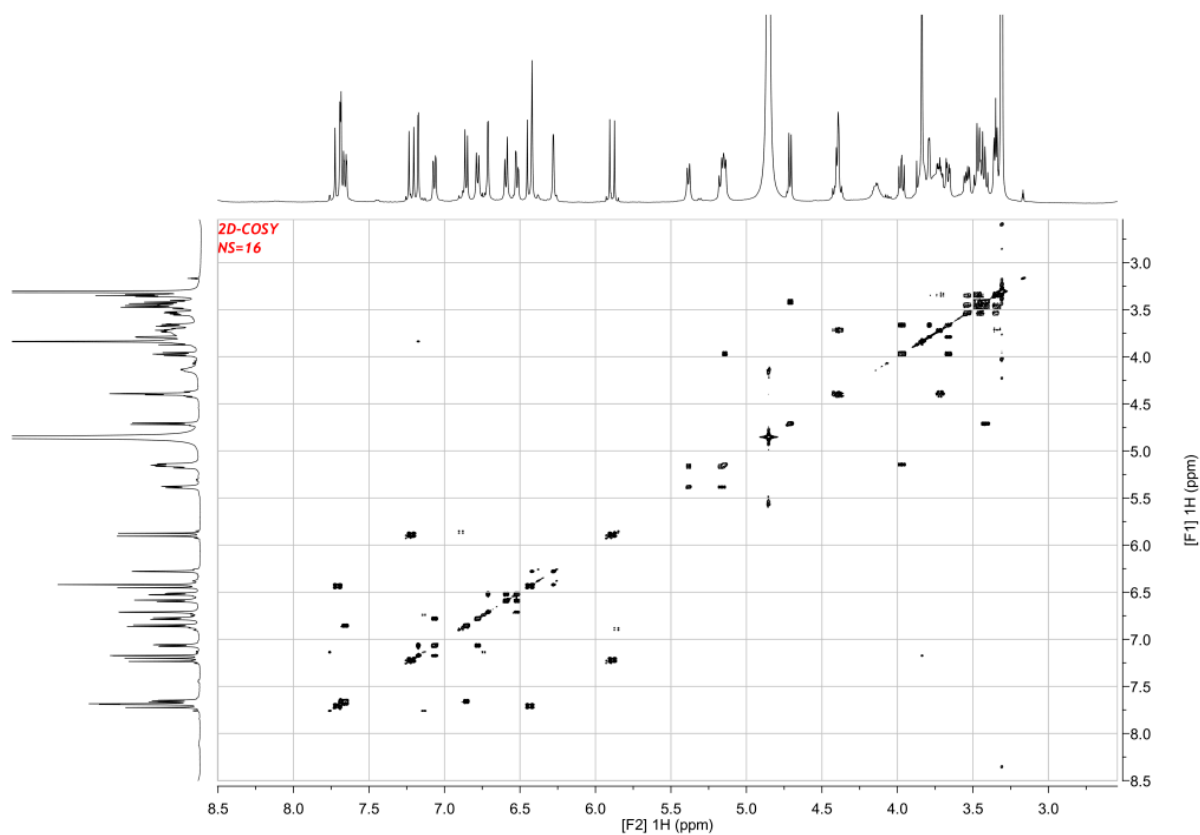

**Figure S175.** 2D TOCSY NMR spectrum of compound **17** (methanol- $d_4$ , 500.18 MHz).

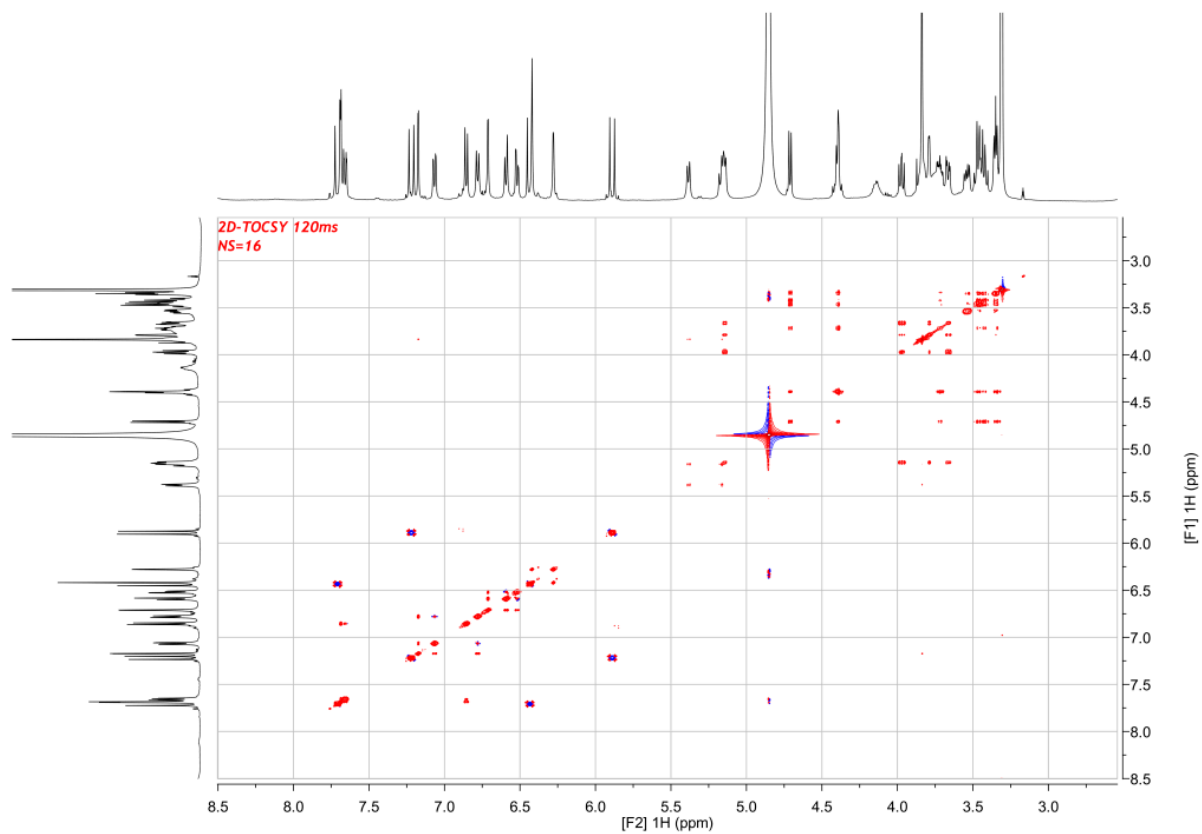

**Figure S176.** 2D ROESY NMR spectrum of compound **17** (methanol- $d_4$ , 500.18 MHz).

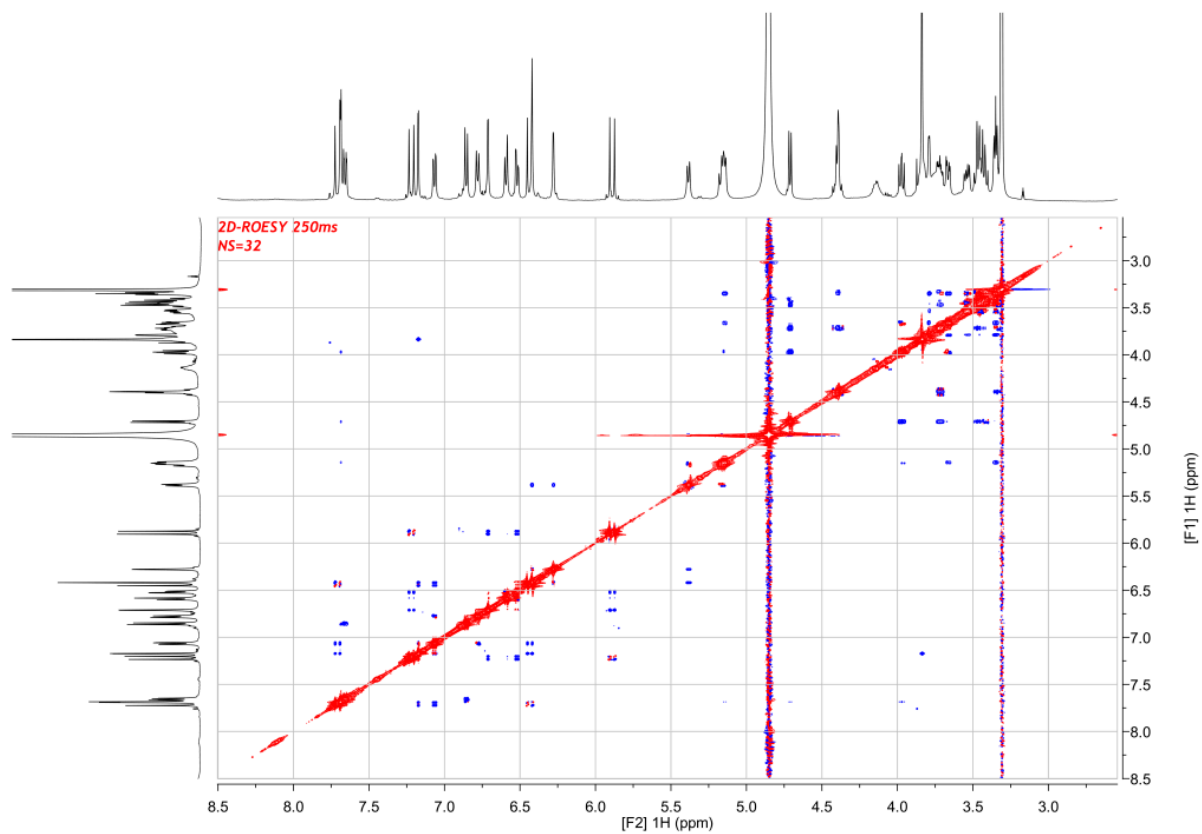

**Figure S177.** 2D *g*-HSQC-NMR spectrum of compound **17** (methanol-*d*<sub>4</sub>, 500.18 MHz, 125.77 MHz).

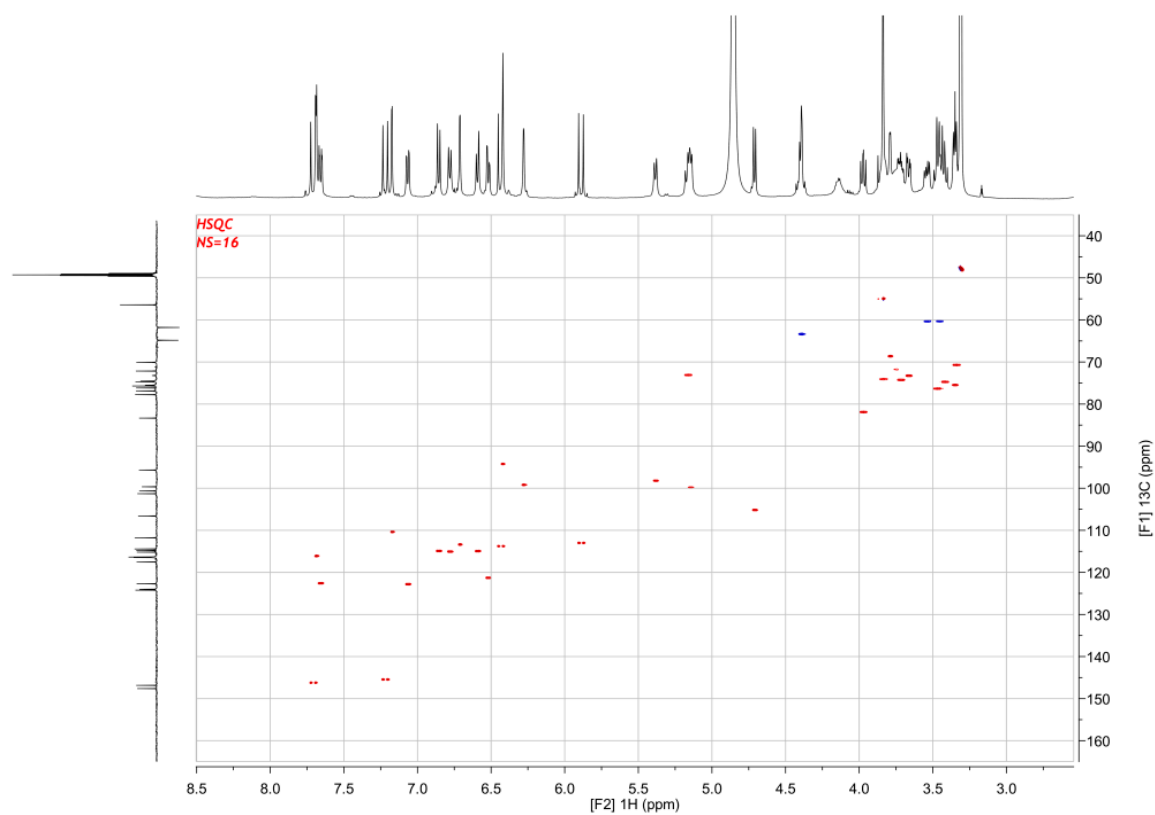

**Figure S178.** 2D *g*-HSQC-TOCSY NMR spectrum of compound **17** (methanol-*d*<sub>4</sub>, 500.18 MHz, 125.77 MHz).

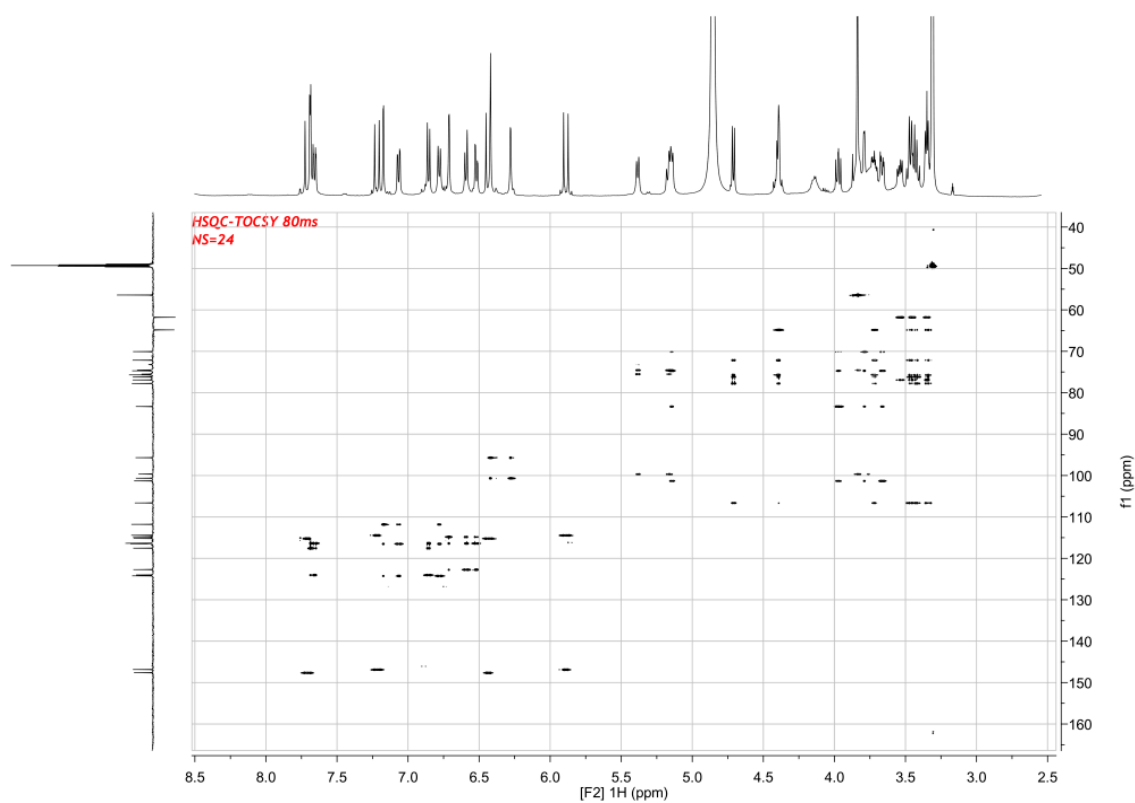

**Figure S179.** 2D g-HMBC-NMR spectrum of compound **17** (methanol-*d*<sub>4</sub>, 500.18 MHz, 125.77 MHz).

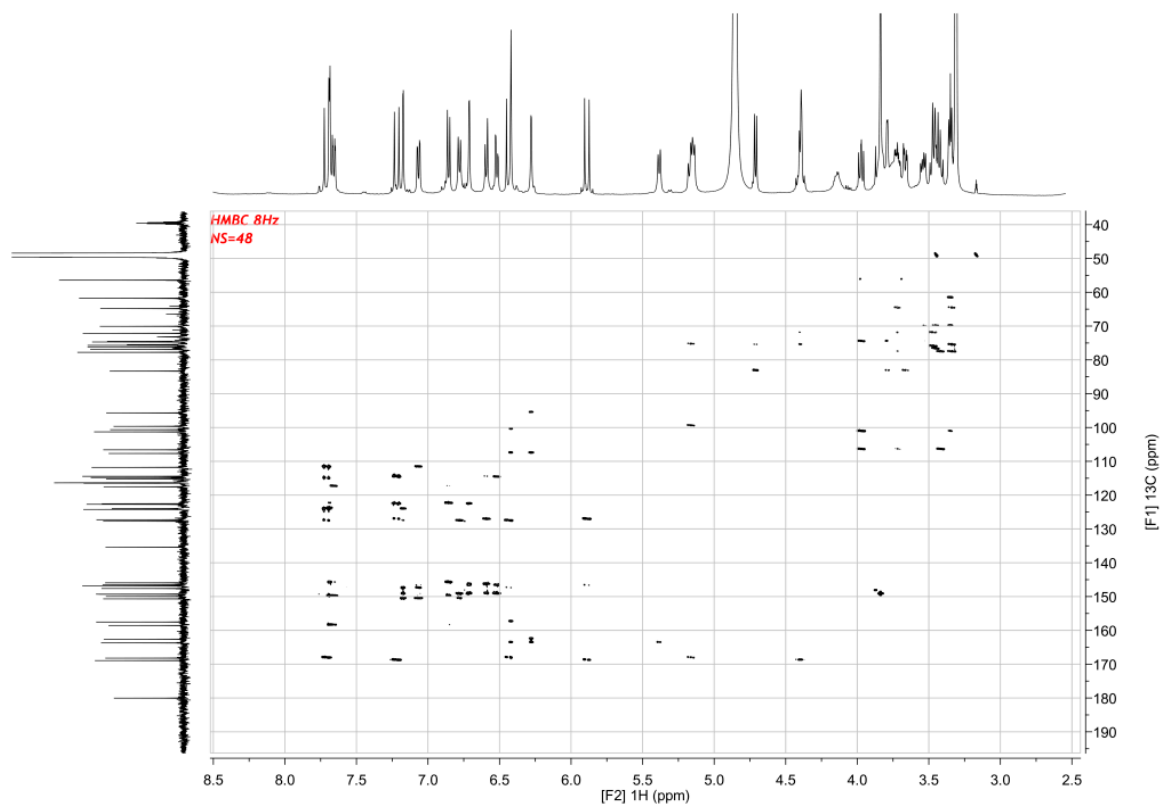

**Figure S180.** 1D TOCSY and 1D ROESY NMR subspectra of H-1(7-*O*- $\beta$ -GlcA) in compound **17** (methanol-*d*<sub>4</sub>, 500.18 MHz).

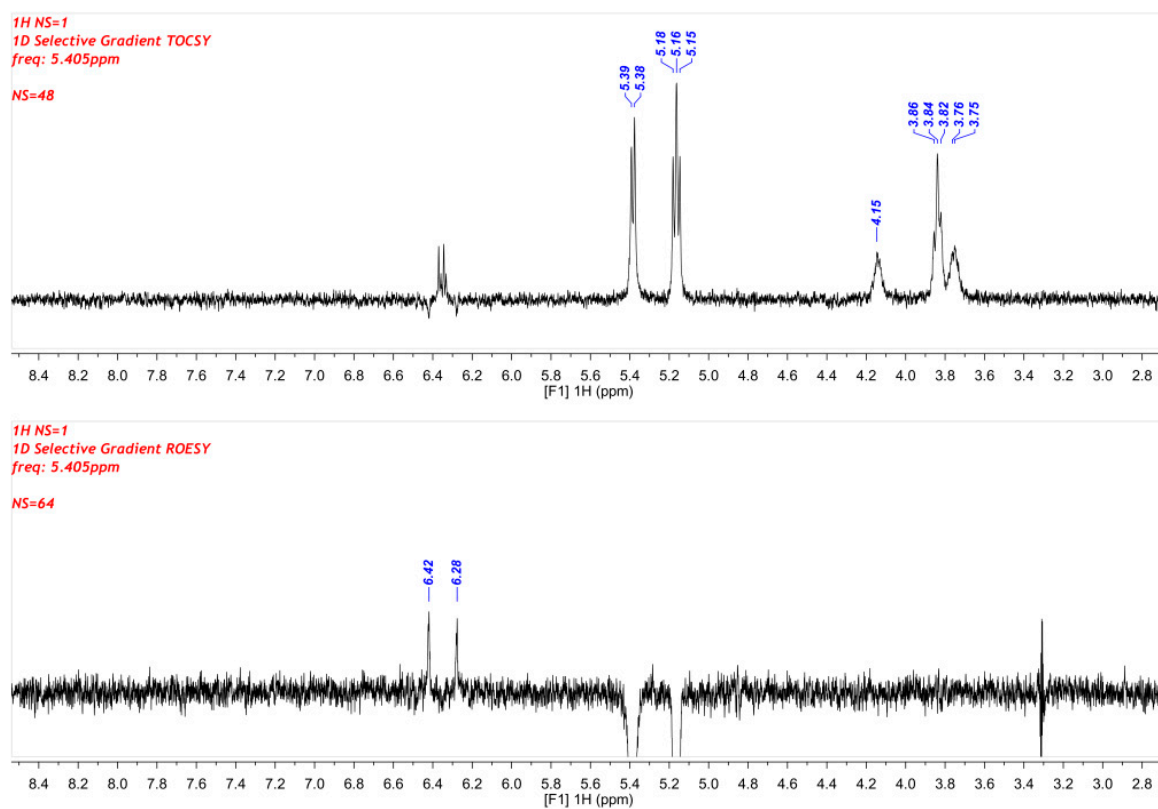



**Figure S181.** 1D TOCSY subspectrum of H-2(*3-O*- $\beta$ -Gal) in compound **17** (methanol-*d*<sub>4</sub>, 500.18 MHz).

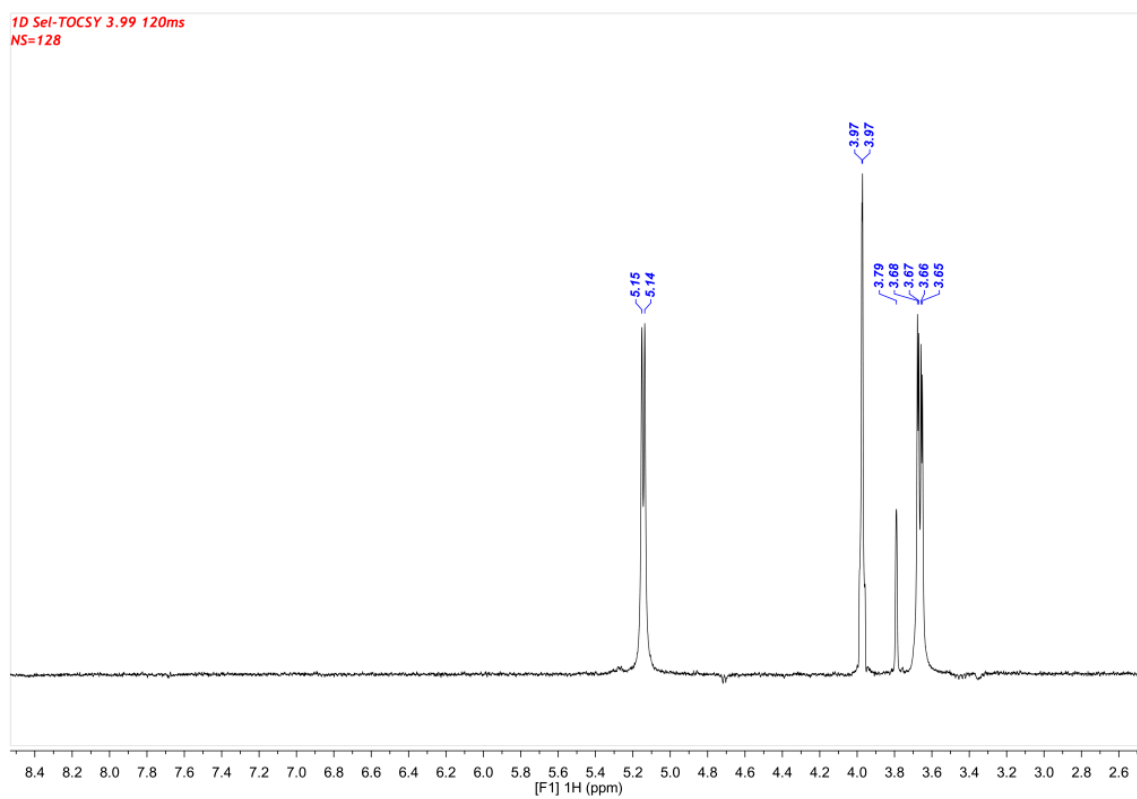

**Figure S182.** 1D TOCSY and 1D ROESY NMR subspectra of H-1(*2*<sup>Gal</sup>-*O*- $\beta$ -Glc) in compound **17** (methanol-*d*<sub>4</sub>, 500.18 MHz).

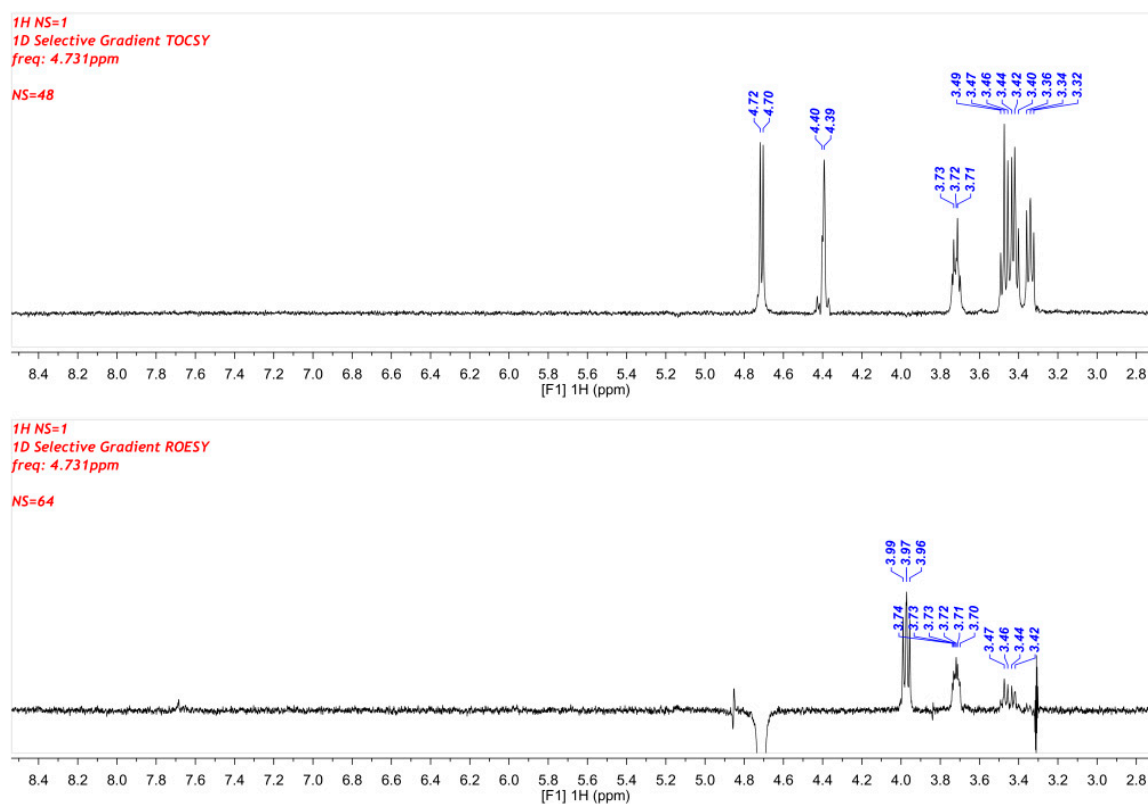

## Compound 18

Figure S183. 1D  $^1\text{H}$ -NMR spectrum of compound **18** (methanol- $d_4$ , 500.18 MHz).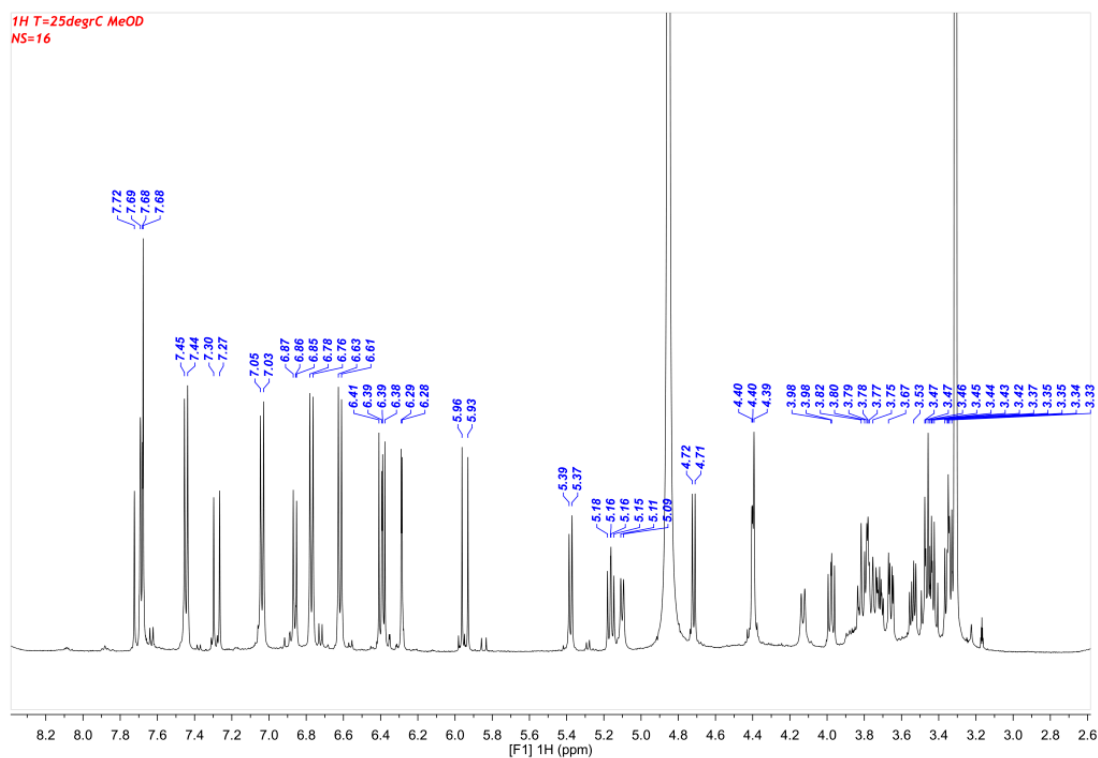Figure S184. 1D  $^{13}\text{C}$ -NMR spectra ( $^1\text{H}$  decoupled and DEPT-135) of compound **18** (methanol- $d_4$ , 125.77 MHz).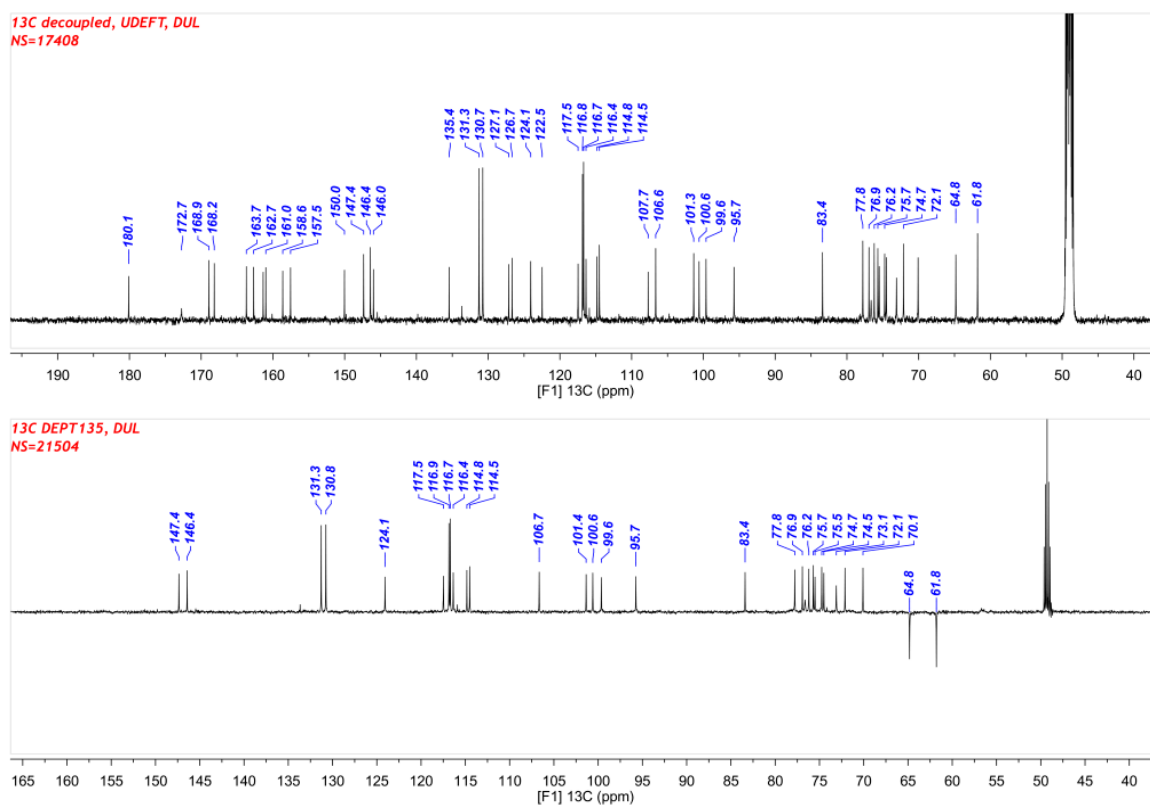

**Figure S185.** 2D g-COSY NMR spectrum of compound **18** (methanol-*d*<sub>4</sub>, 500.18 MHz).

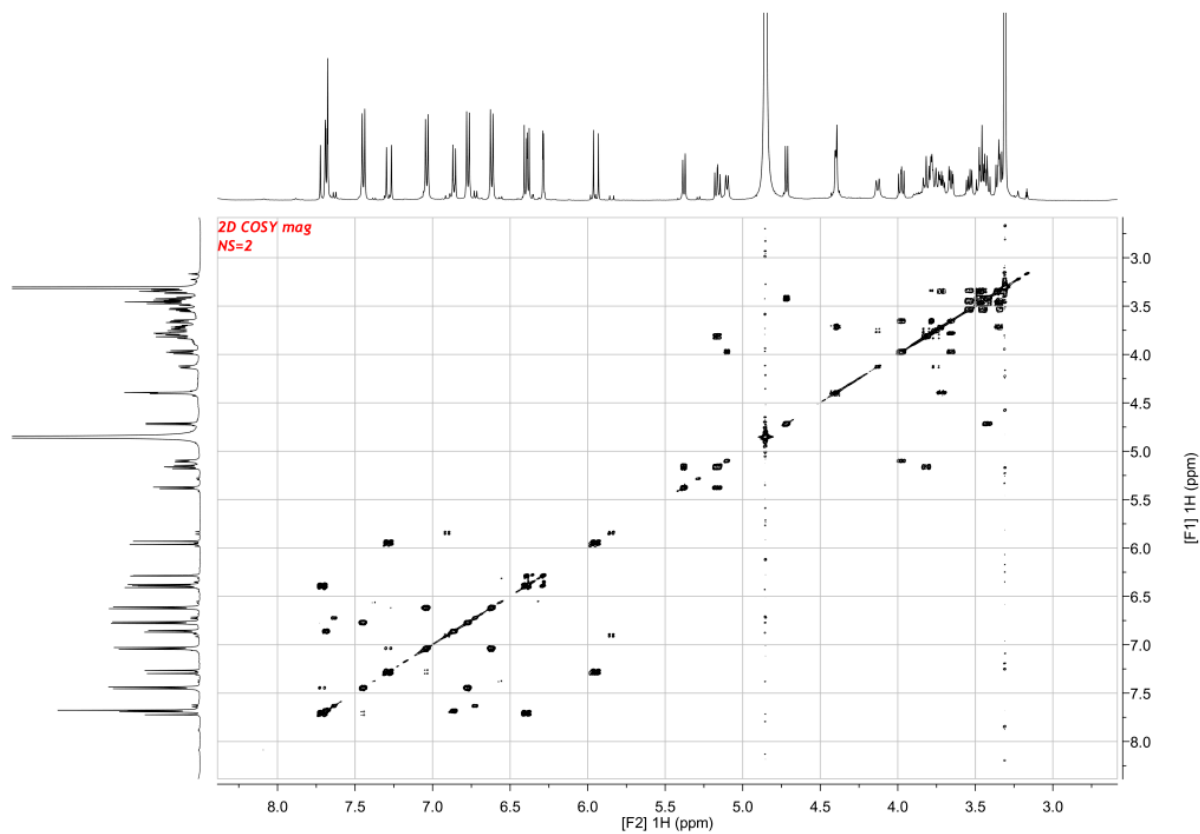

**Figure S186.** 2D TOCSY NMR spectrum of compound **18** (methanol-*d*<sub>4</sub>, 500.18 MHz).

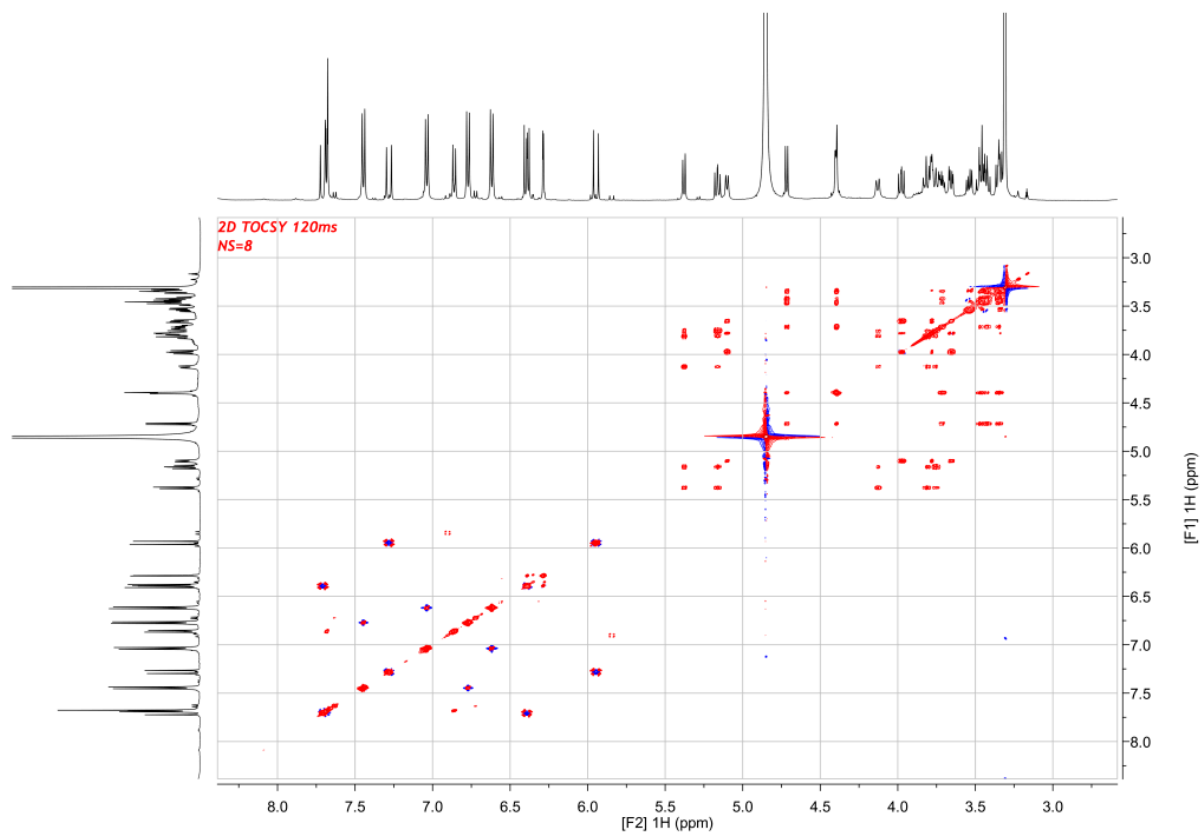

**Figure S187.** 2D ROESY NMR spectrum of compound **18** (methanol- $d_4$ , 500.18 MHz).

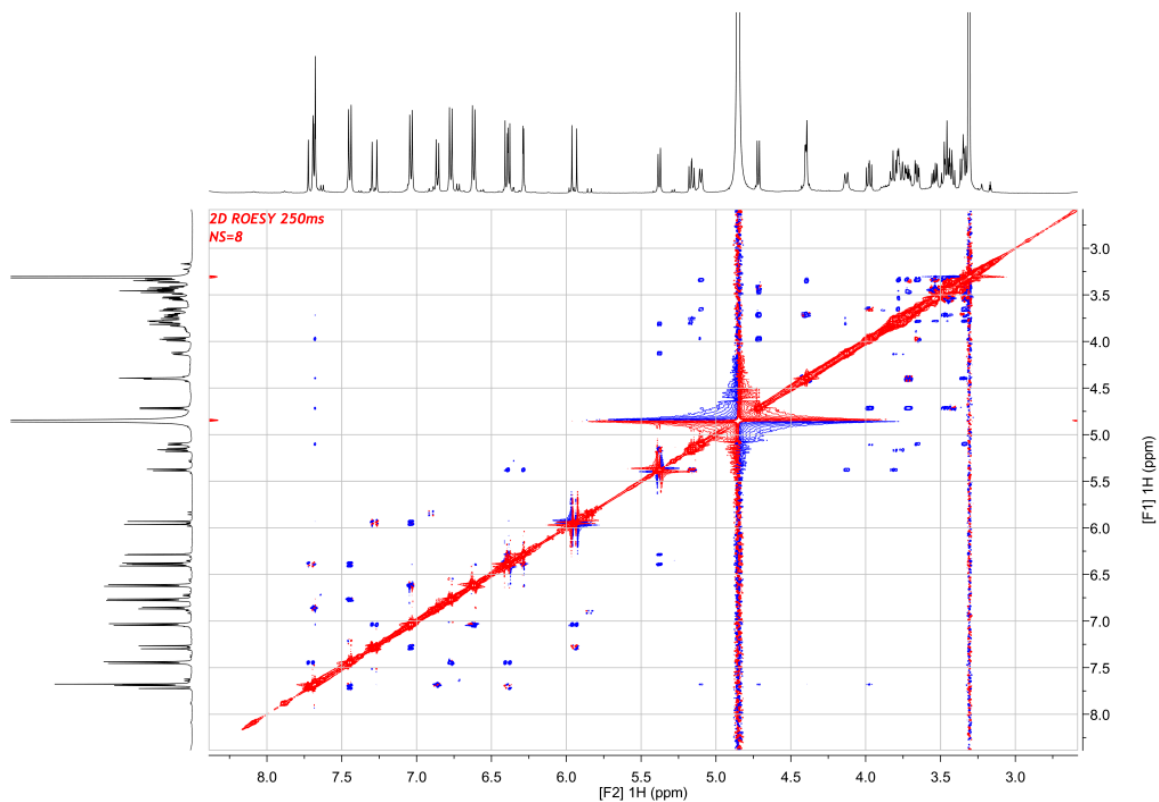

**Figure S188.** 2D g-HSQC-NMR spectrum of compound **18** (methanol- $d_4$ , 500.18 MHz, 125.77 MHz).

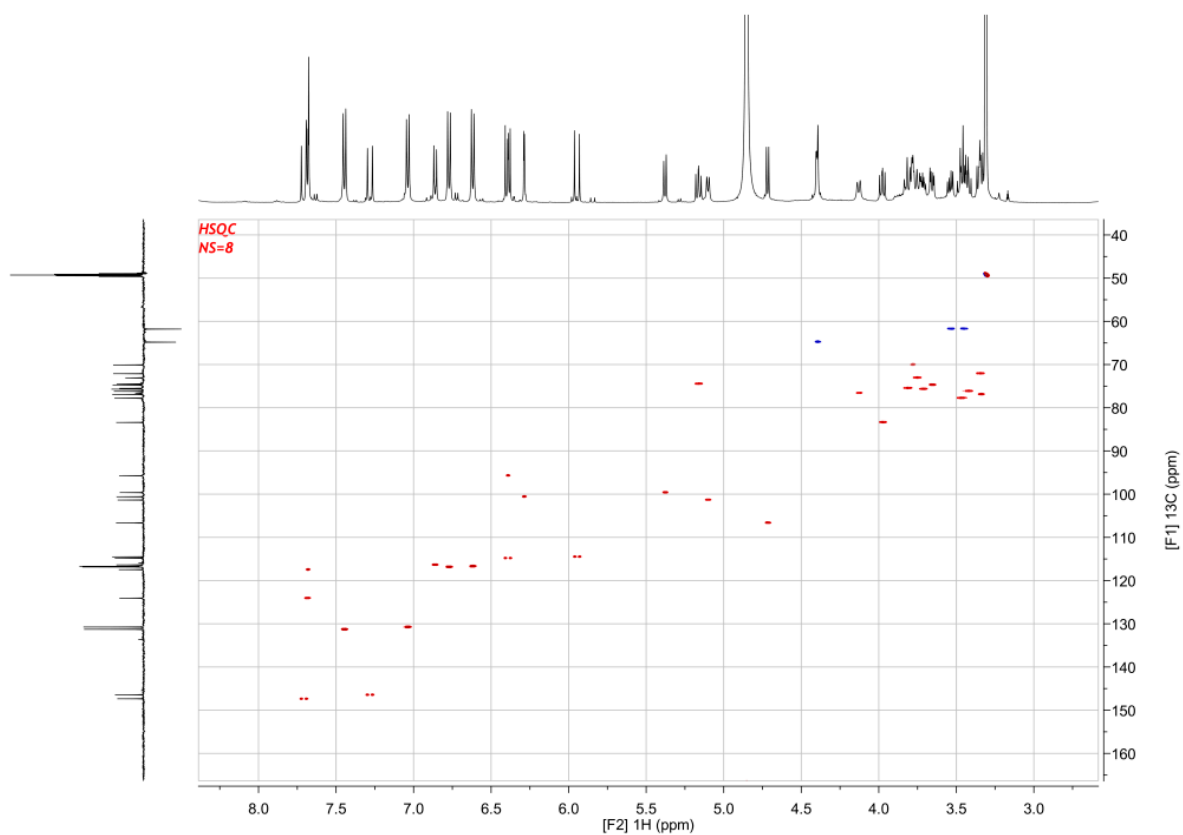

**Figure S189.** 2D g-HSQC-TOCSY NMR spectrum of compound **18** (methanol- $d_4$ , 500.18 MHz, 125.77 MHz).

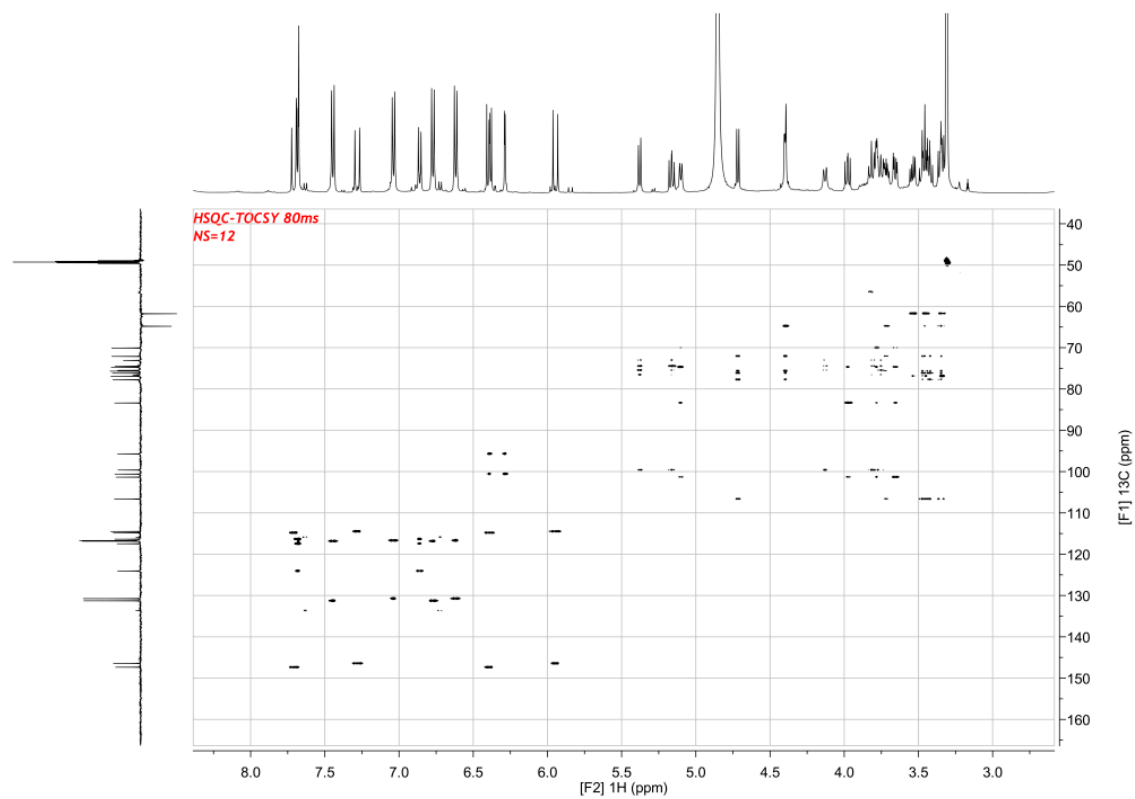

**Figure S190.** 2D g-HMBC-NMR spectrum of compound **18** (methanol- $d_4$ , 500.18 MHz, 125.77 MHz).

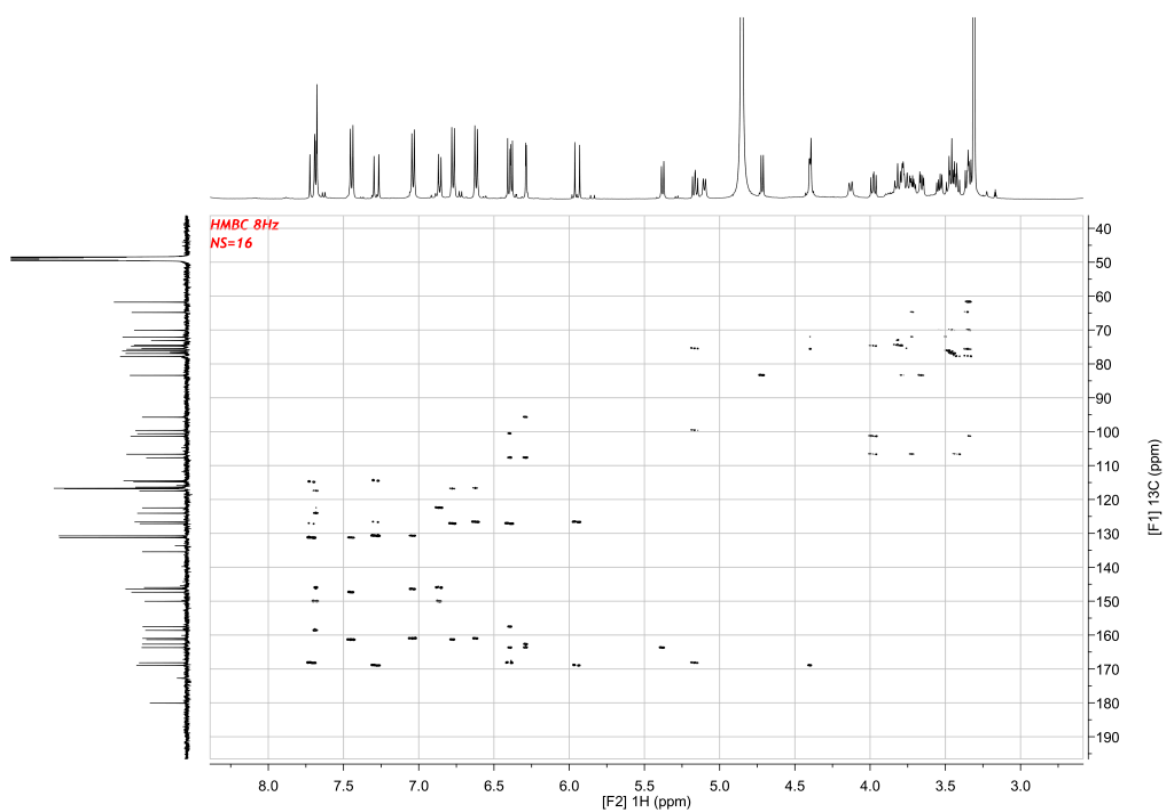

**Figure S191.** 1D TOCSY and 1D ROESY NMR subspectra of H-1(*7-O*- $\beta$ -GlcA) in compound **18** (methanol-*d*<sub>4</sub>, 500.18 MHz).

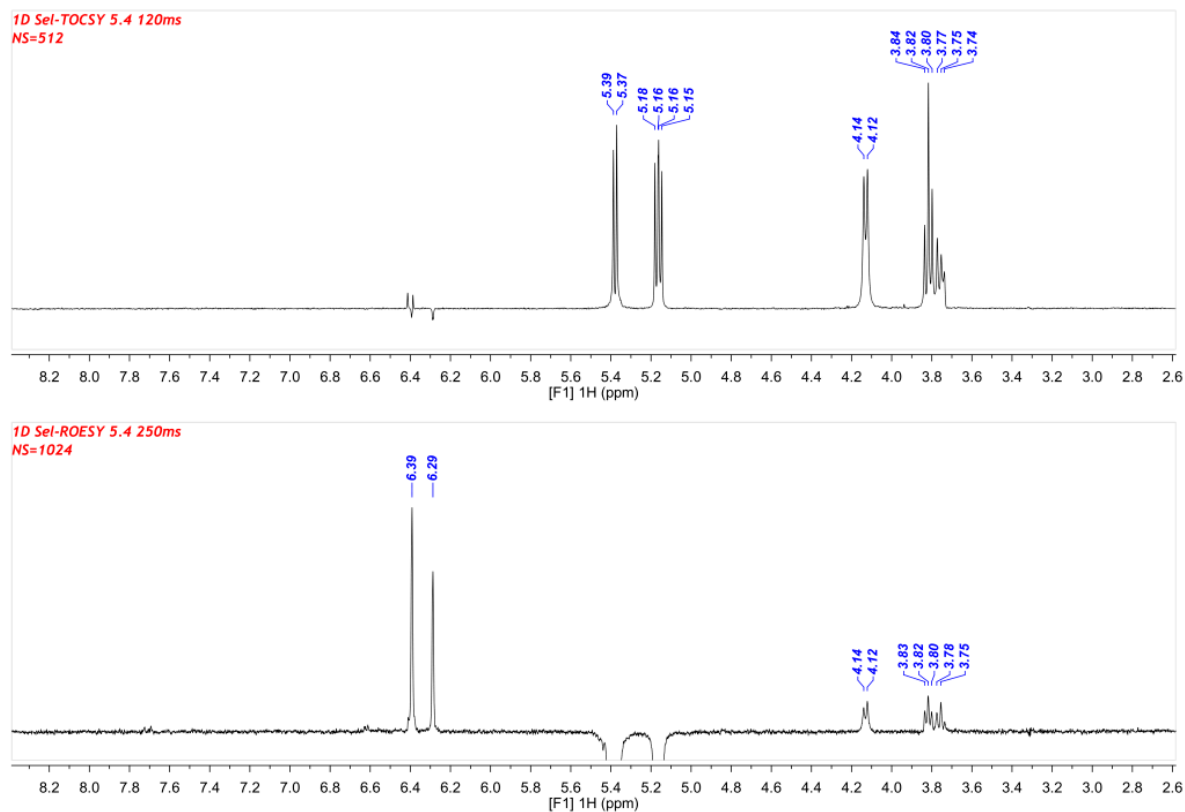

**Figure S192.** 1D TOCSY and 1D ROESY NMR subspectra of H-1(*3-O*- $\beta$ -Gal) in compound **18** (methanol-*d*<sub>4</sub>, 500.18 MHz).

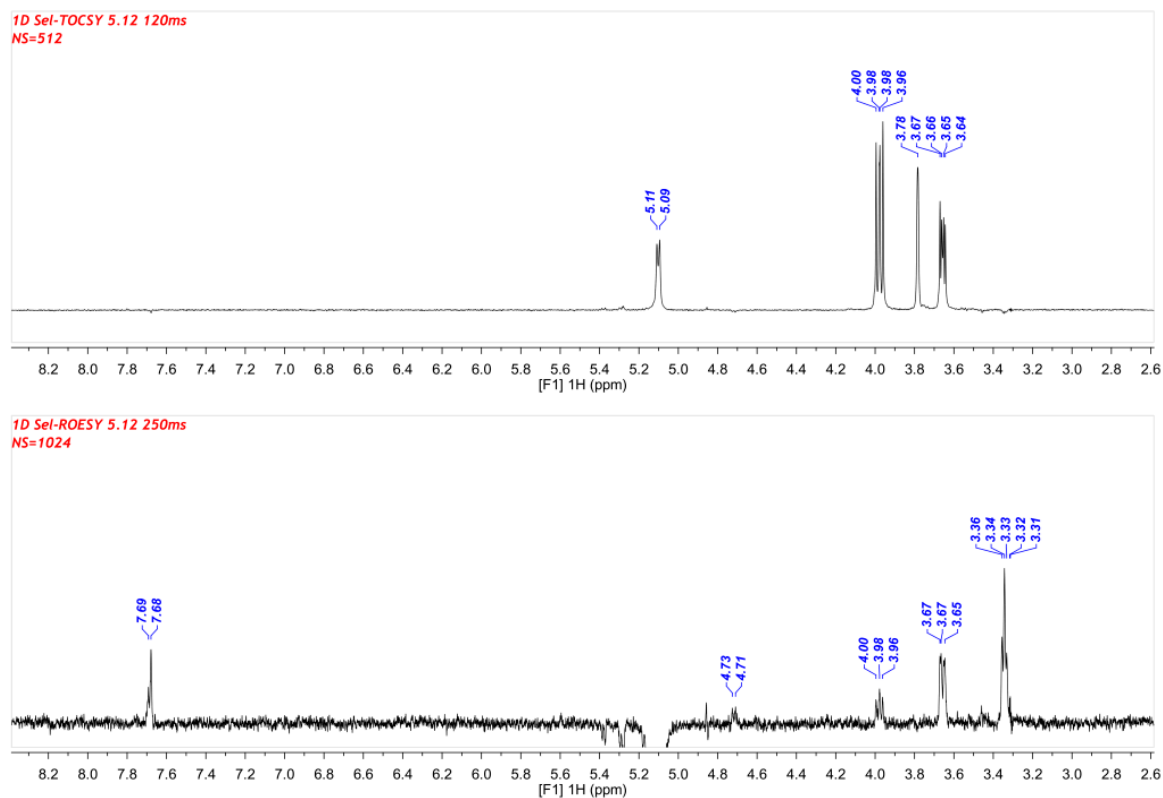

**Figure S193.** 1D TOCSY and 1D ROESY NMR subspectra of H-1( $_2^{\text{Gal}}\text{-O-}\beta\text{-Glc}$ ) in compound **18** (methanol- $d_4$ , 500.18 MHz).

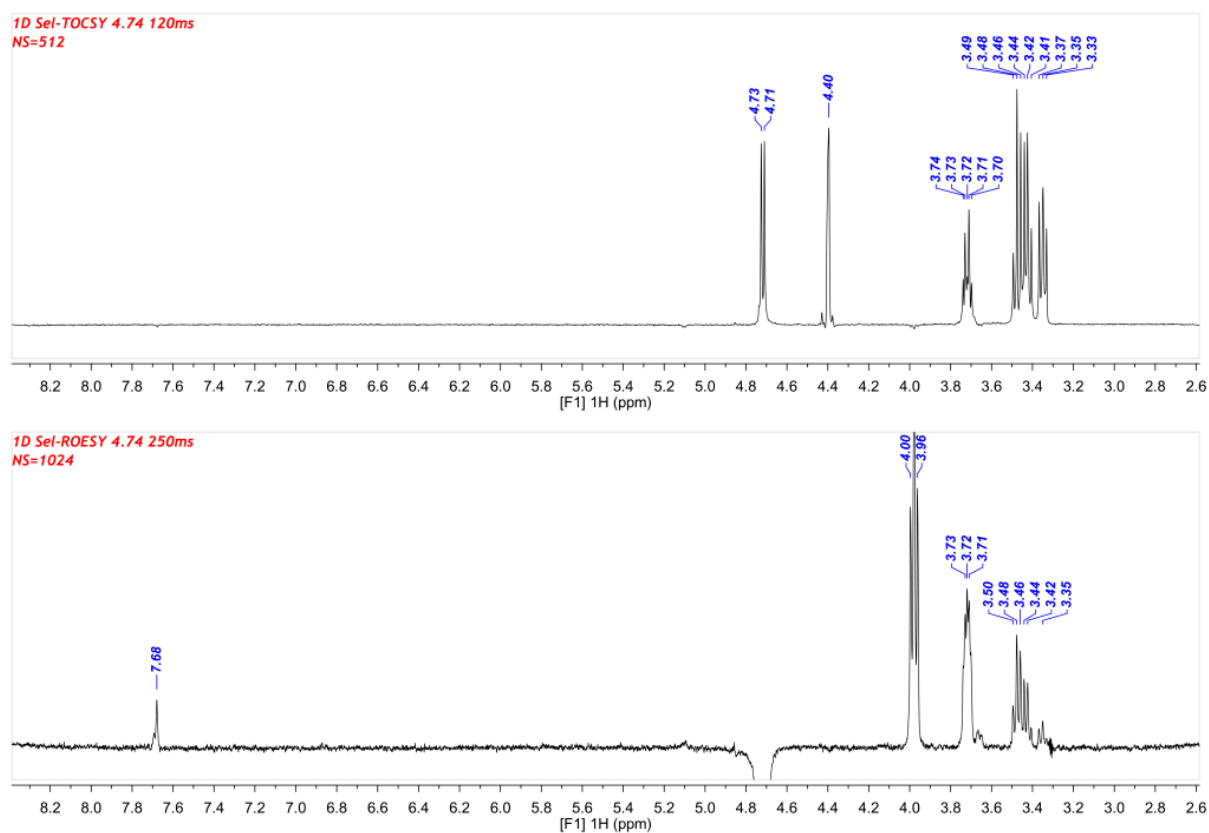

**Figure S194.** UPLC-MS chromatograms of phenolic acid reference standards.

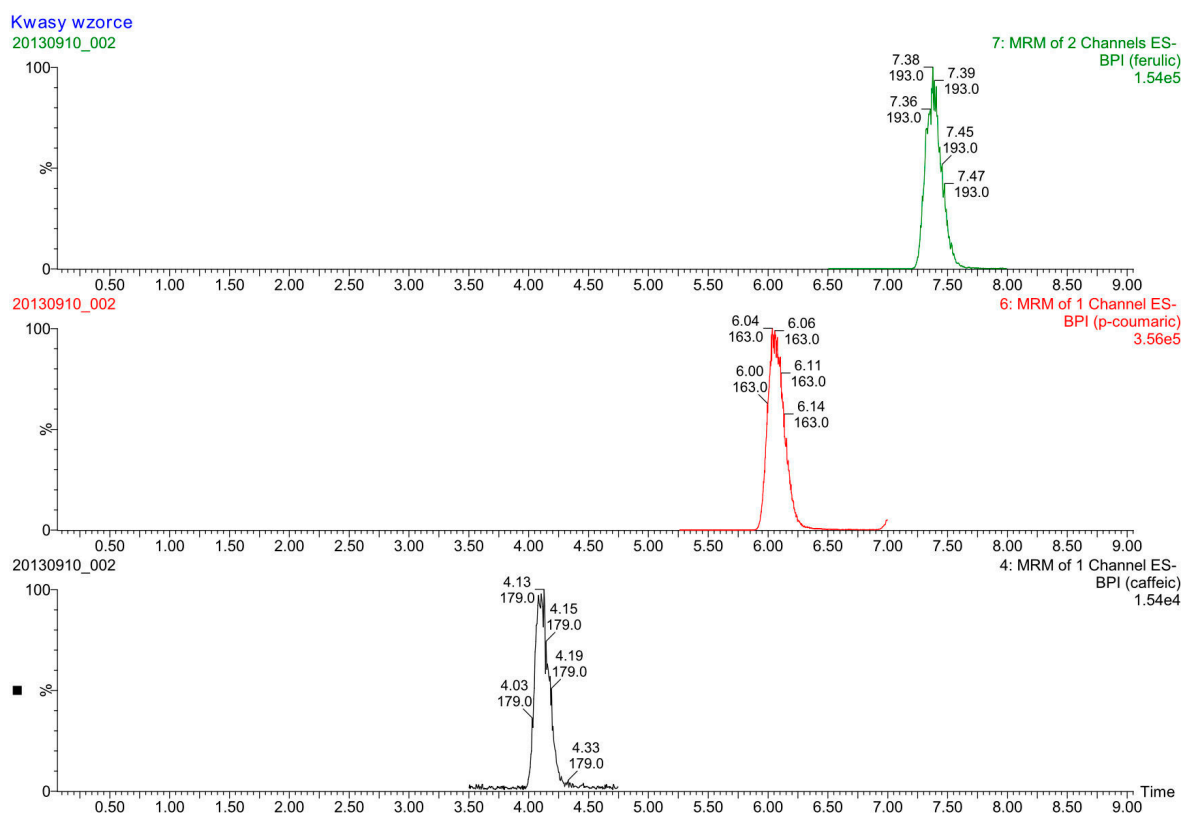

**Figure S195.** UPLC-MS chromatograms of phenolic acids released during alkaline hydrolysis of the compound **4**.

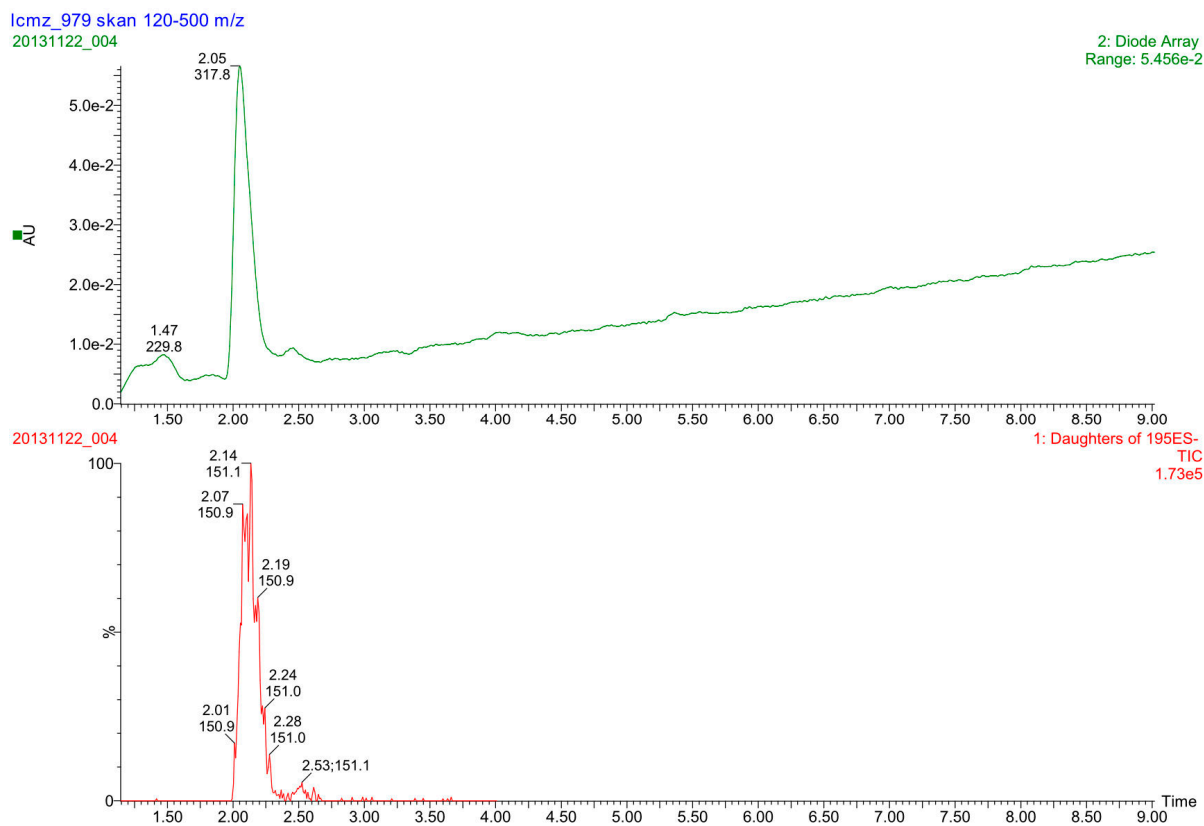

**Figure S196.** The UV spectrum of the putative 3,4,5-trihydroxycinnamic acid.

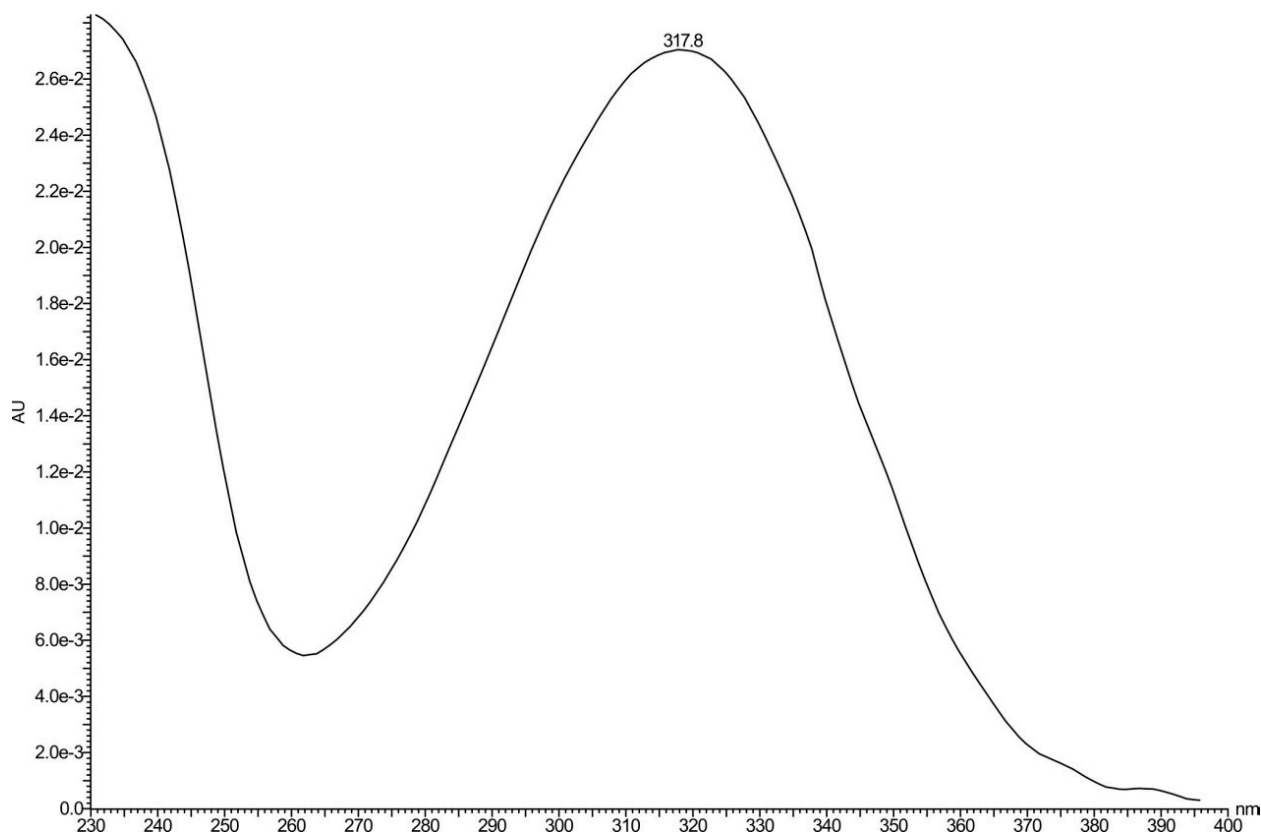



**Figure S197.** UPLC-MS chromatograms of phenolic acids released during alkaline hydrolysis of the compound 5.

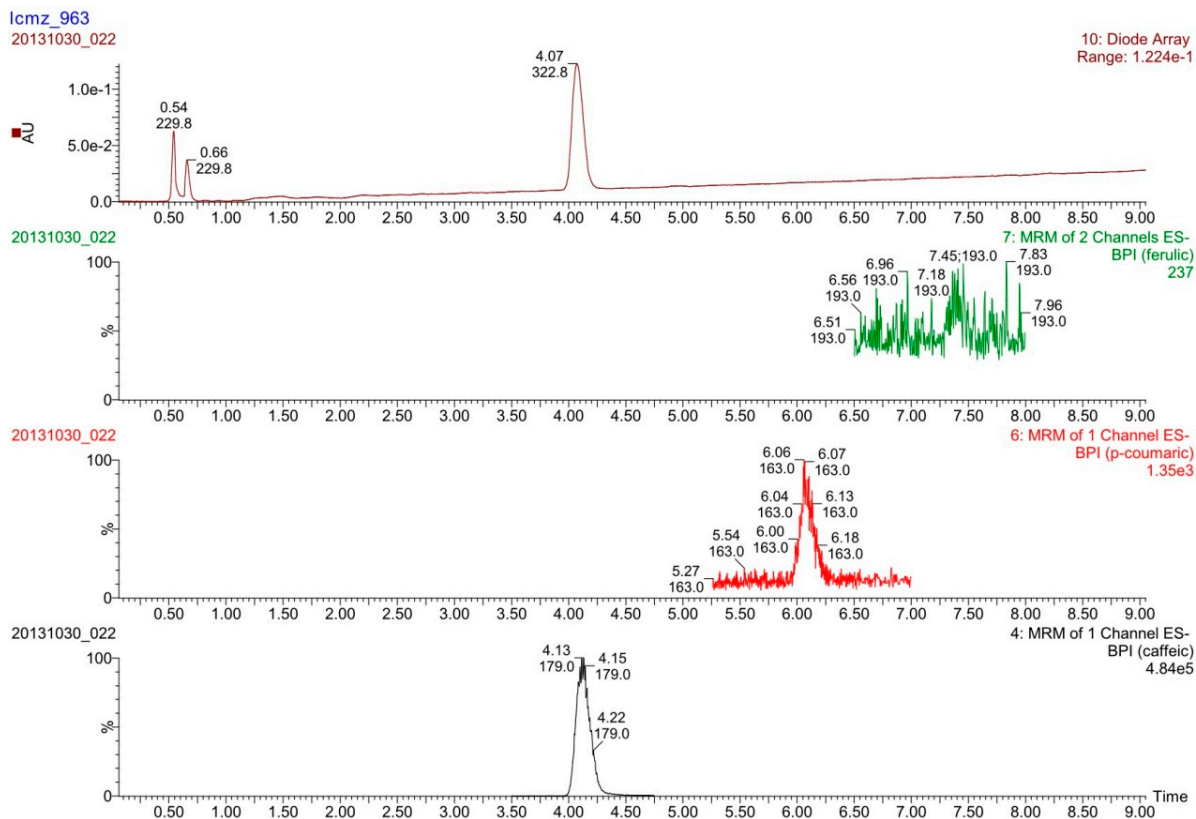

**Figure S198.** UPLC-MS chromatograms of phenolic acids released during alkaline hydrolysis of the compound 6.

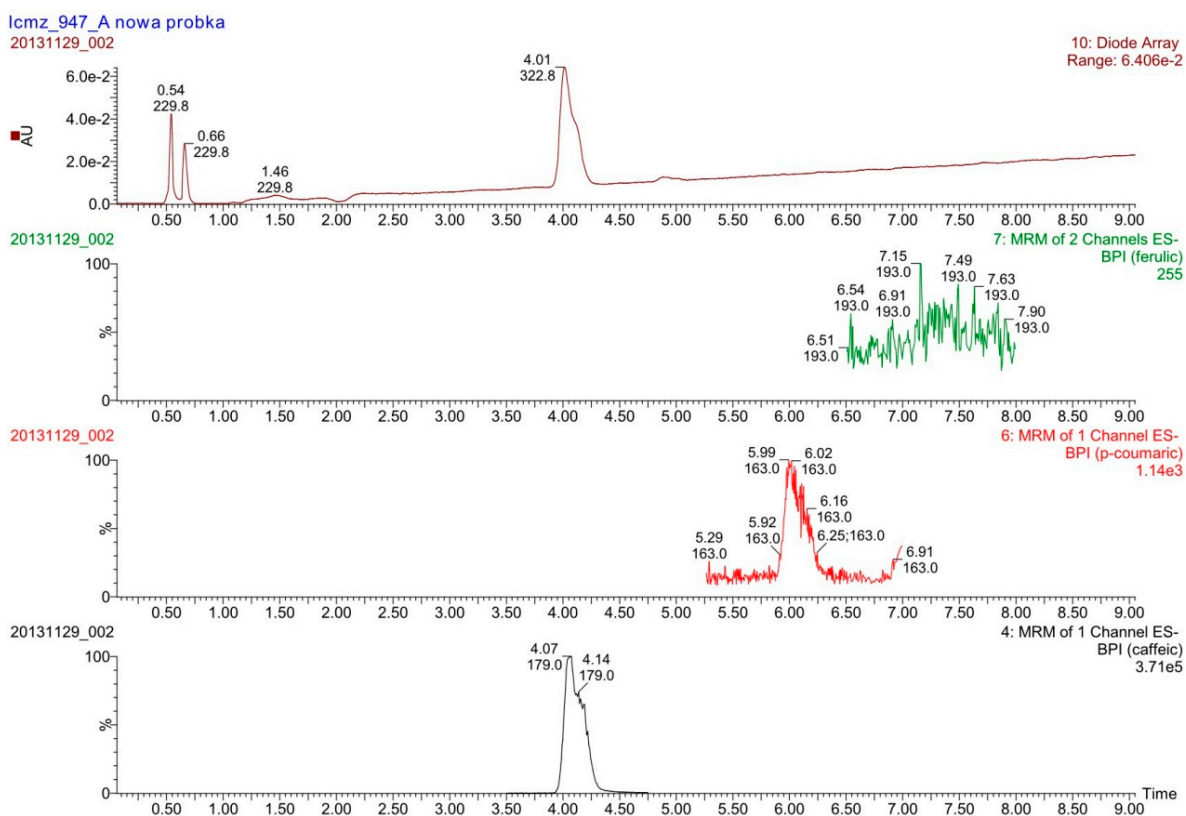

**Figure S199.** UPLC-MS chromatograms of phenolic acids released during alkaline hydrolysis of the compound 7.

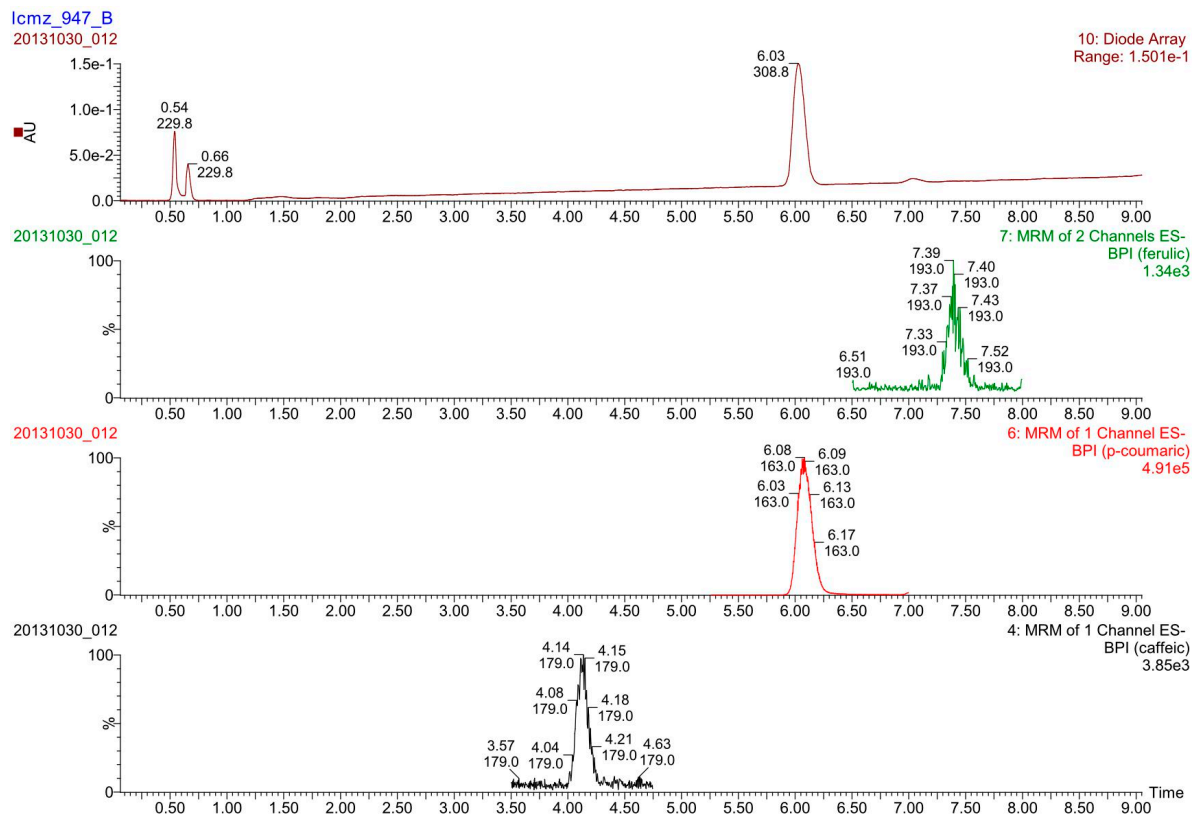

**Figure S200.** UPLC-MS chromatograms of phenolic acids released during alkaline hydrolysis of the compound 8.

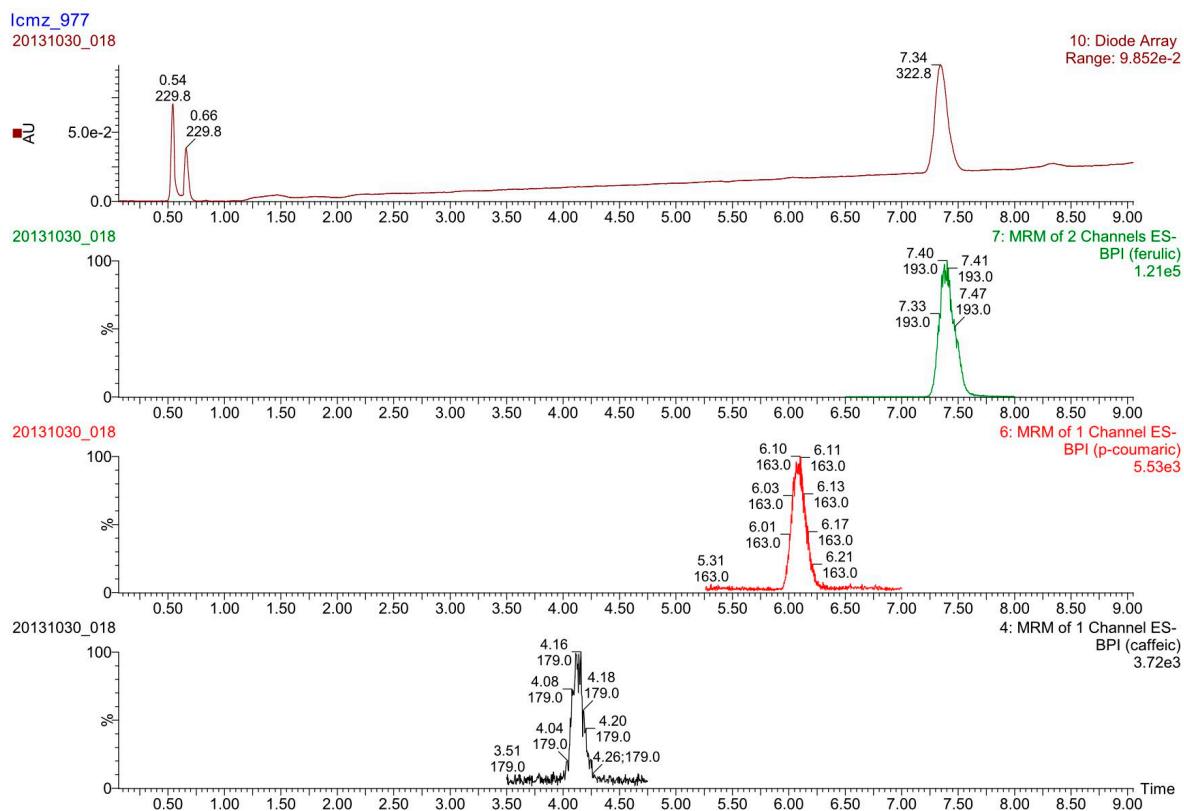

**Figure S201.** UPLC-MS chromatograms of phenolic acids released during alkaline hydrolysis of the compound **9**.

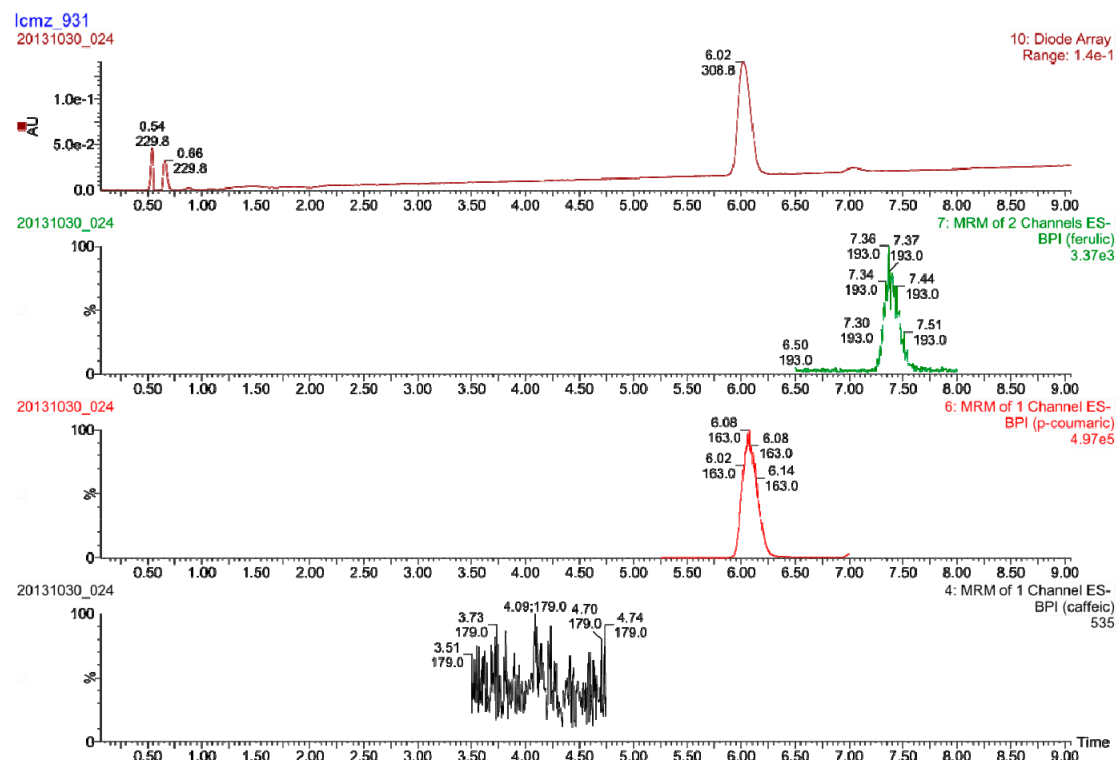

**Figure S202.** UPLC-MS chromatograms of phenolic acids released during alkaline hydrolysis of the compound **10**.

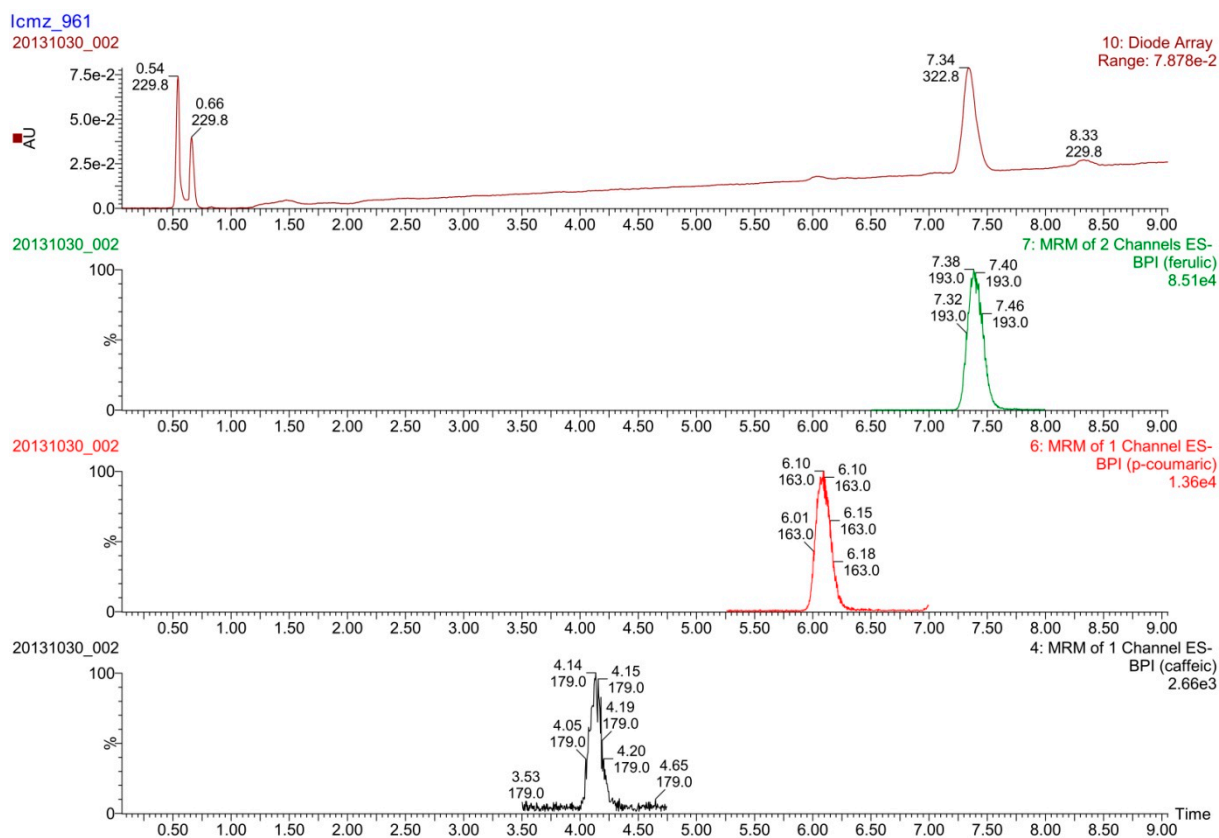

**Figure S203.** UPLC-MS chromatograms of phenolic acids released during alkaline hydrolysis of the compound **11**.

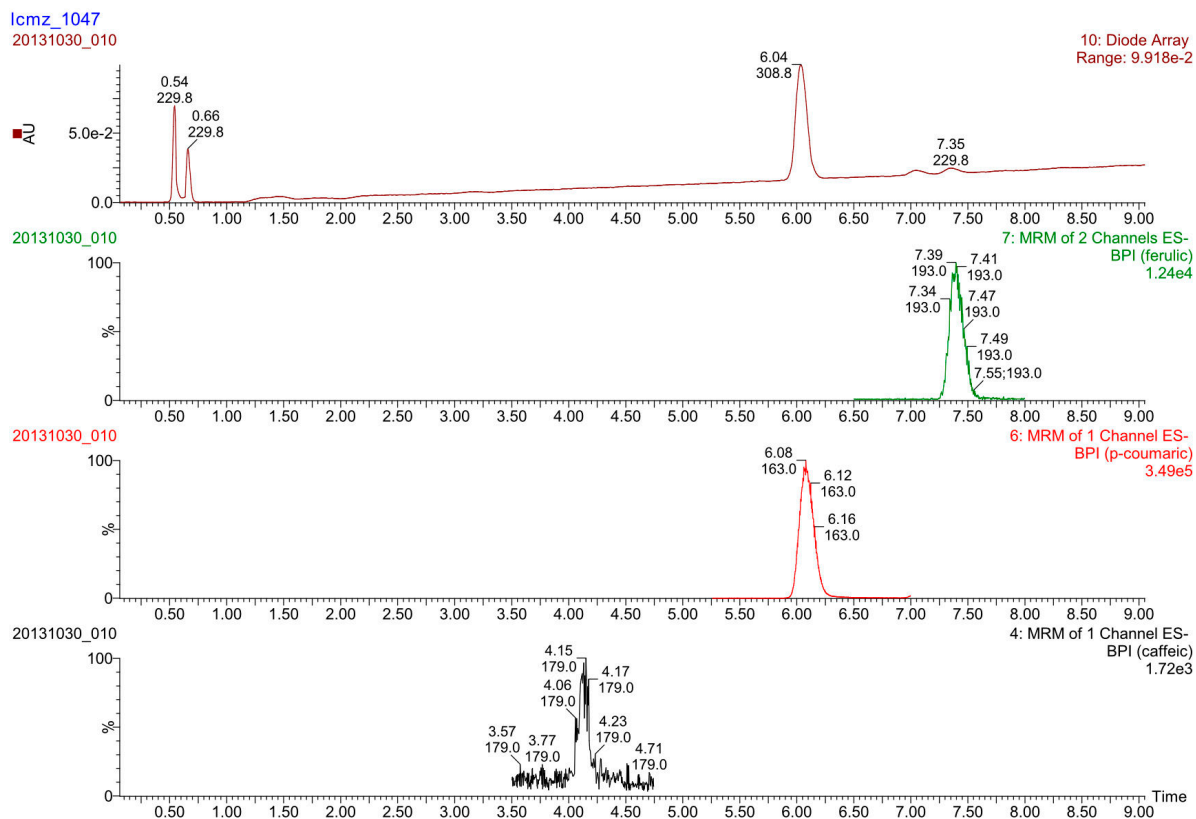

**Figure S204.** UPLC-MS chromatograms of phenolic acids released during alkaline hydrolysis of the compound **12**.

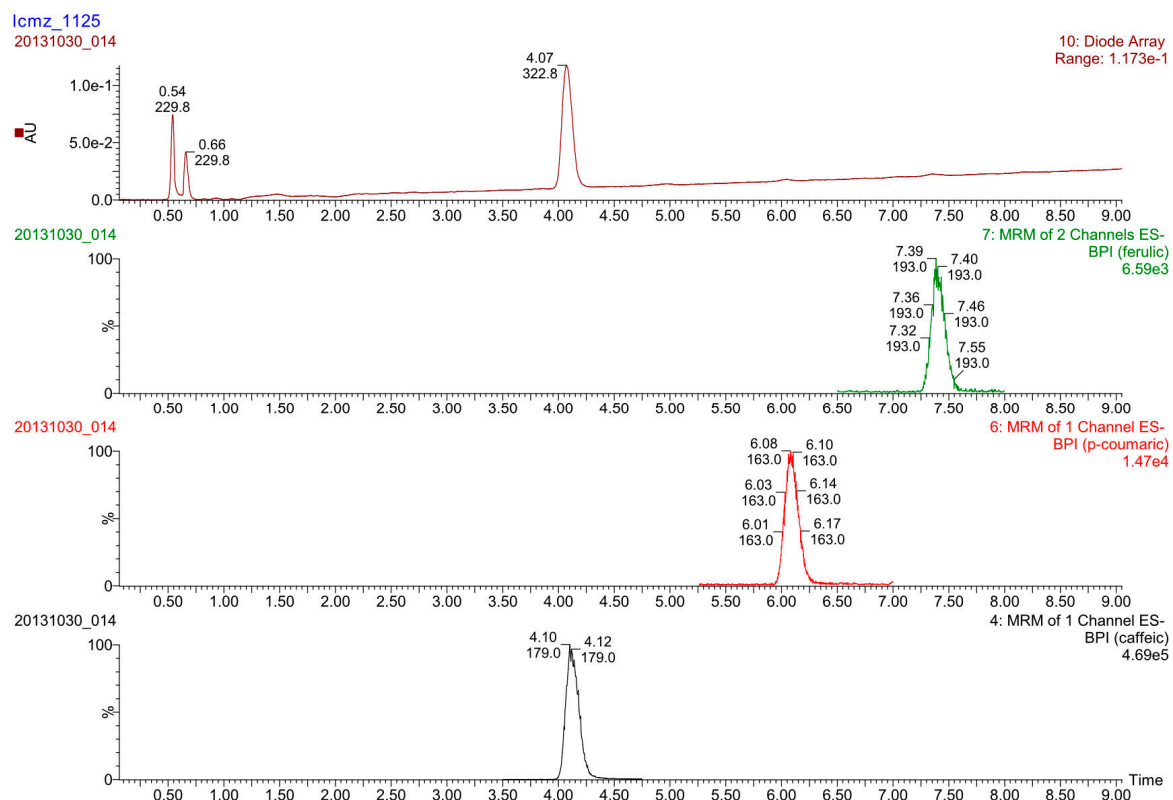

**Figure S205.** UPLC-MS chromatograms of phenolic acids released during alkaline hydrolysis of the compound **13**.

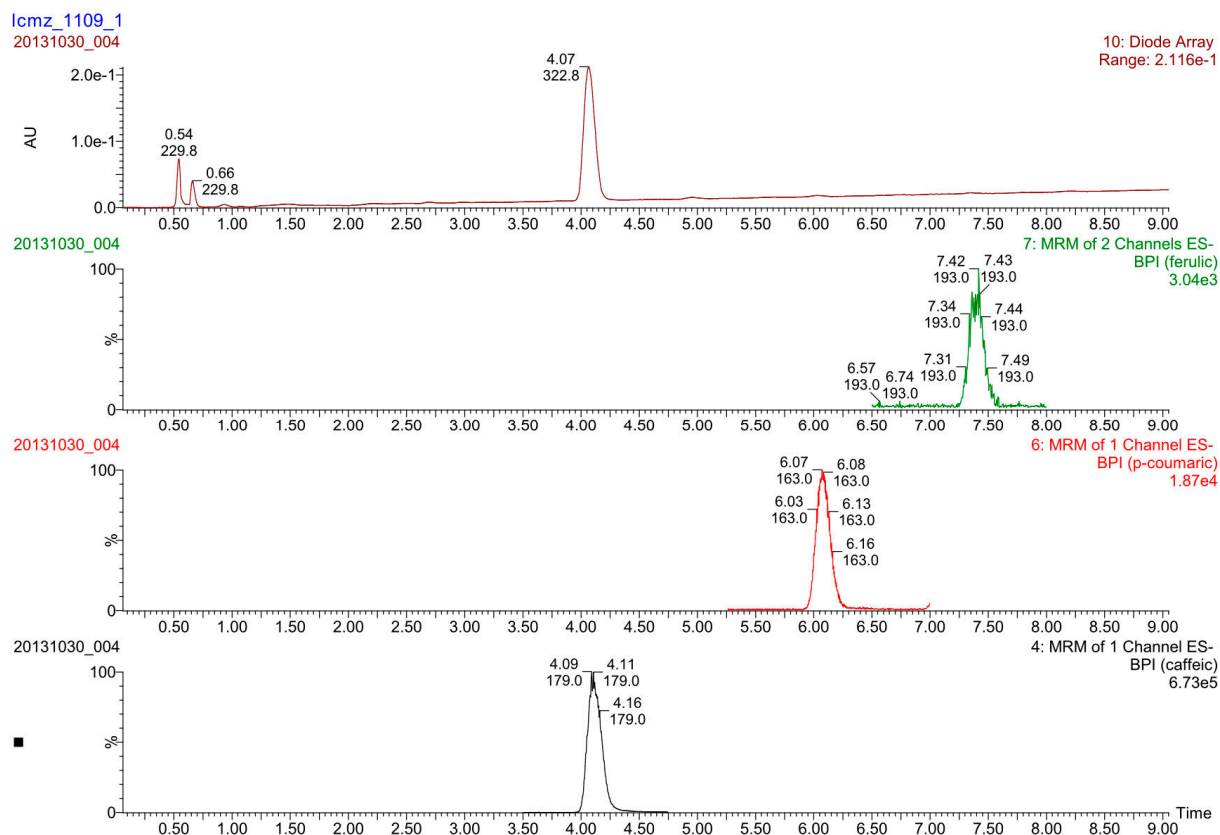

**Figure S206.** UPLC-MS chromatograms of phenolic acids released during alkaline hydrolysis of the compound **14**.

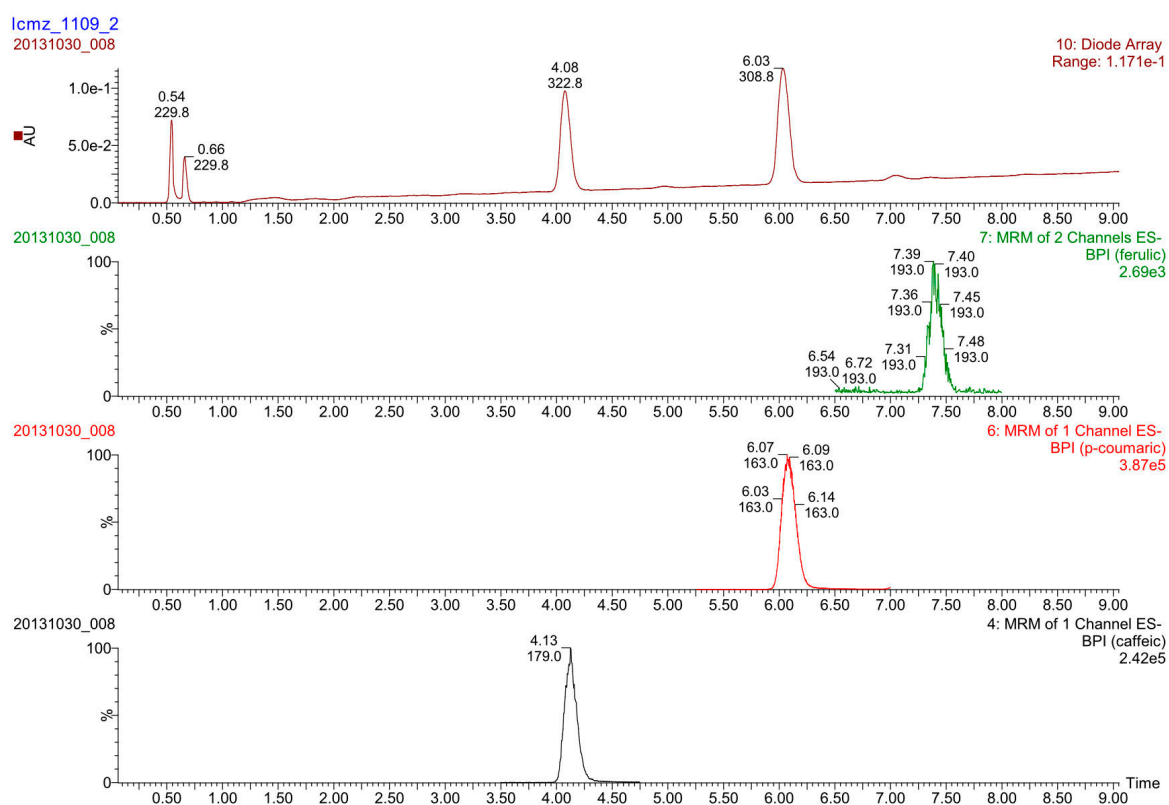



**Figure S207.** UPLC-MS chromatograms of phenolic acids released during alkaline hydrolysis of the compound **15**.

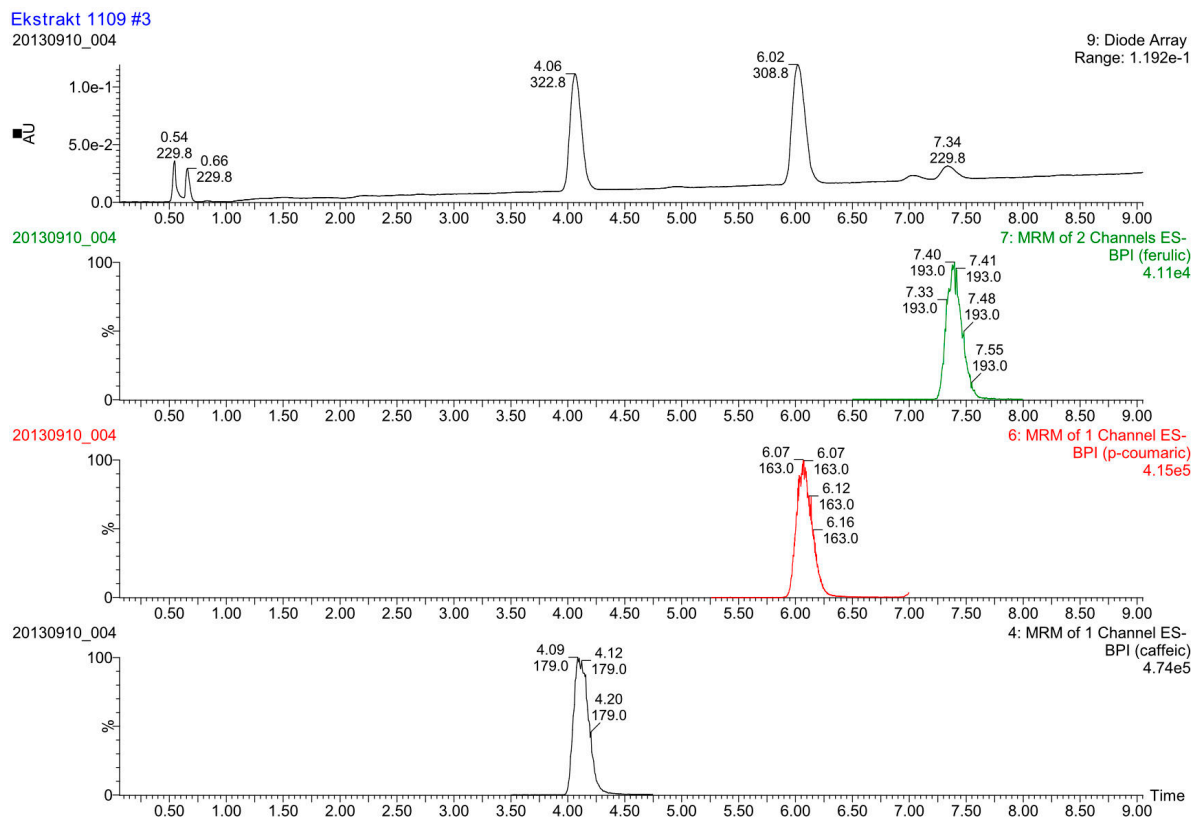

**Figure S208.** UPLC-MS chromatograms of phenolic acids released during alkaline hydrolysis of the compound **17**.

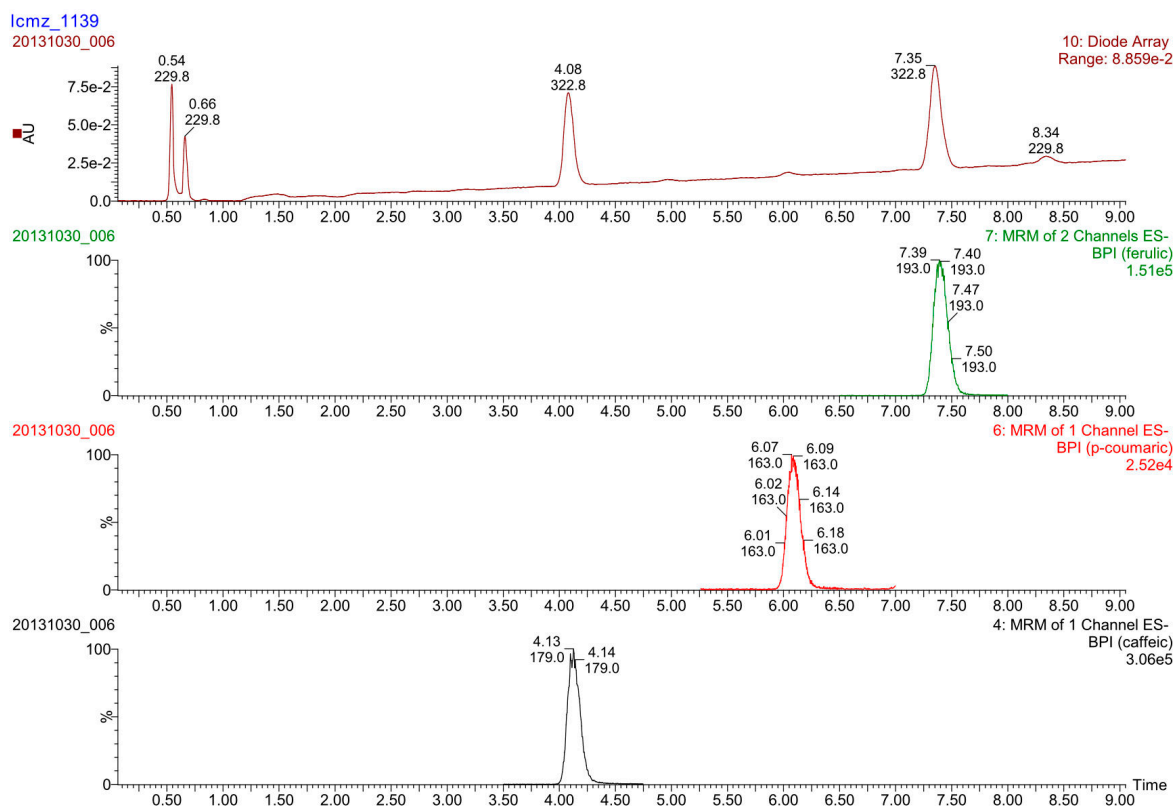

**Figure S209.** UPLC-MS chromatograms of phenolic acids released during alkaline hydrolysis of the compound **18**.

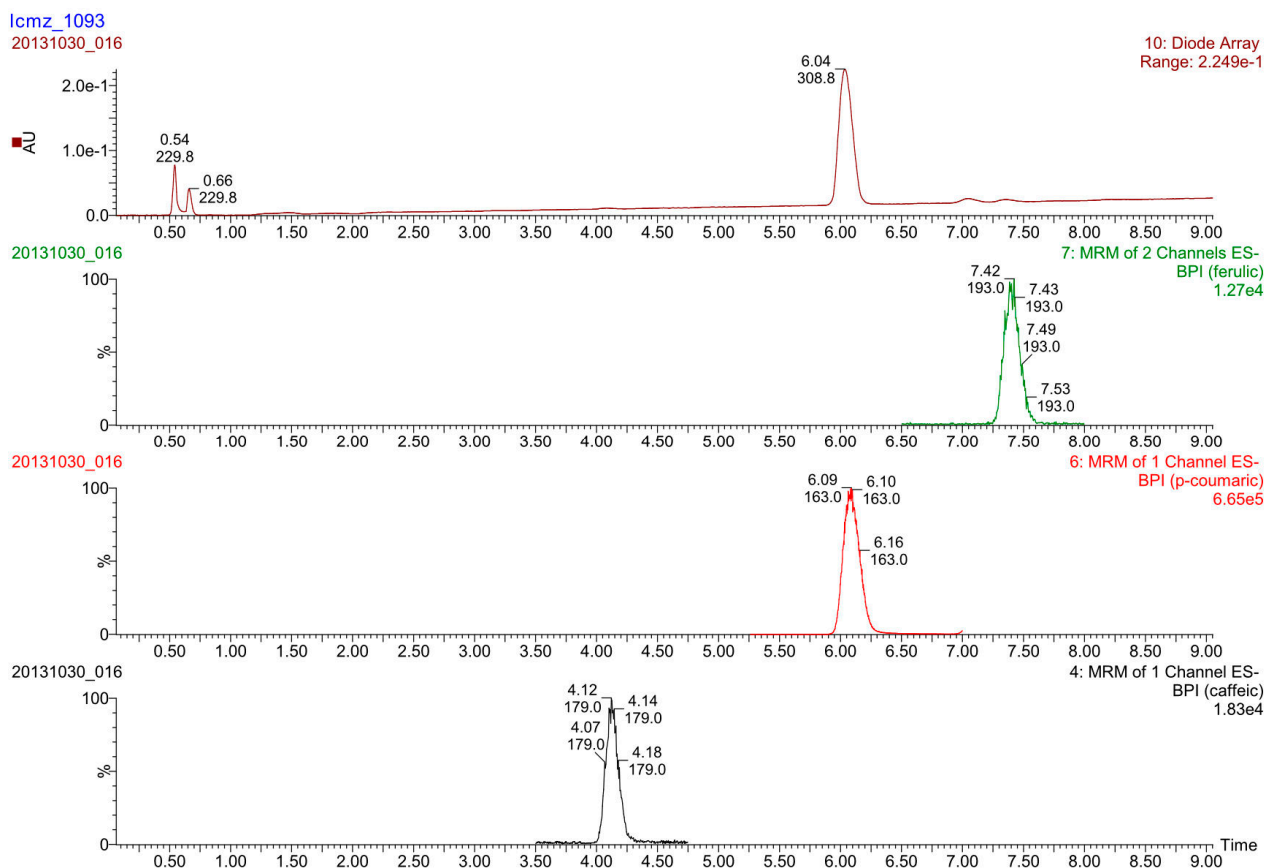

**Figure S210.** UPLC-MS chromatograms of the sugar standards.

D-Glc, D-Gal + L-Cys

20131128\_011

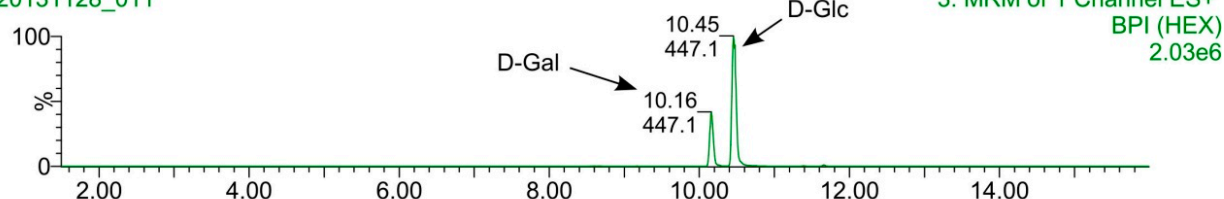

D-GLcA + L-Cys

20131128\_011

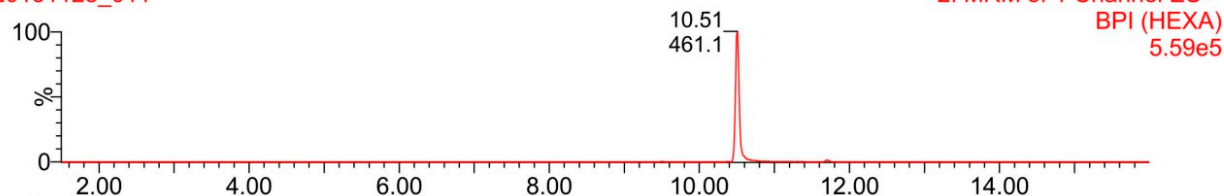

L-Rha + L-Cys

20131128\_011

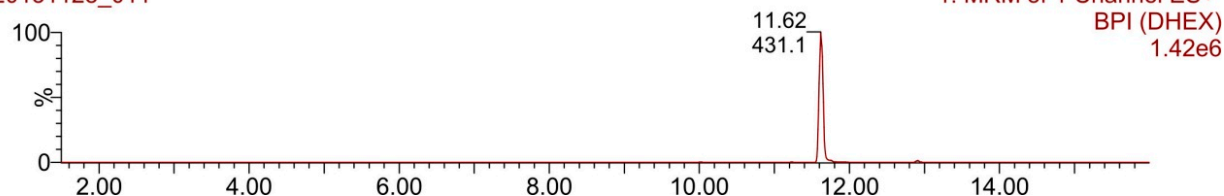

**Figure S211.** UPLC-MS chromatograms of sugars released during the acid hydrolysis of the compound **1**.

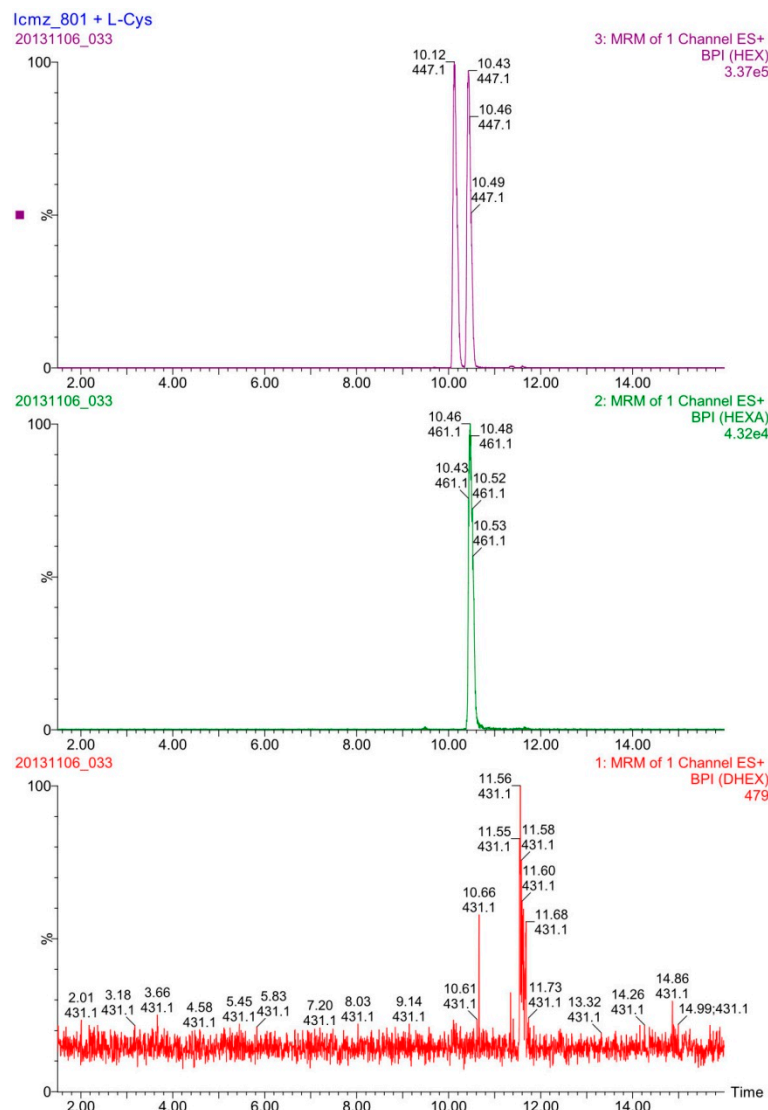

It can be noticed that heights of peaks of D-glucuronic acid, obtained for the samples of sugars released from the flavonoids **1**, **3**, **4–10**, **12–15**, **17**, and **18**, were distinctly lower than those of D-glucose and D-galactose. This may be explained by the fact that 7-*O*-glucuronides of flavonols are much less susceptible to acid hydrolysis than their 7-*O*-glucosides, and especially 7-*O*-rhamnosides (Mabry, T.J.; Markham, K.R.; Thomas, M.B. The aglycone and sugar analysis of flavonoid glycosides. In *The Systematic Identification of Flavonoids*; Springer: Berlin/Heidelberg, Germany, **1970**; pp. 23–32).



**Figure S212.** UPLC-MS chromatograms of sugars released during the acid hydrolysis of the compound **3**.

lcmz\_785 + L-Cys  
20131106\_032

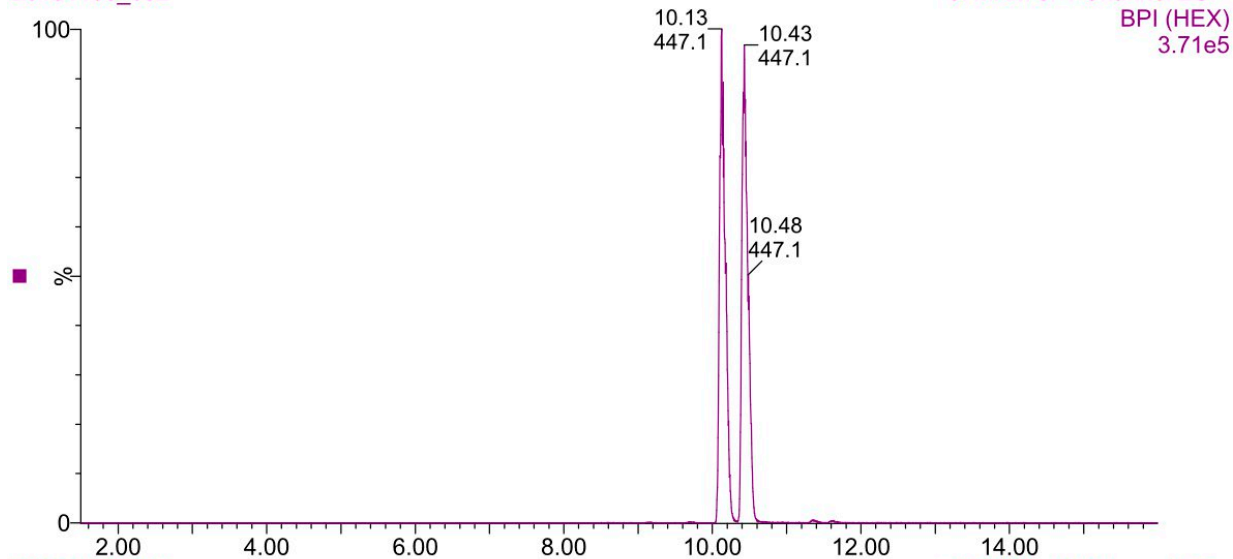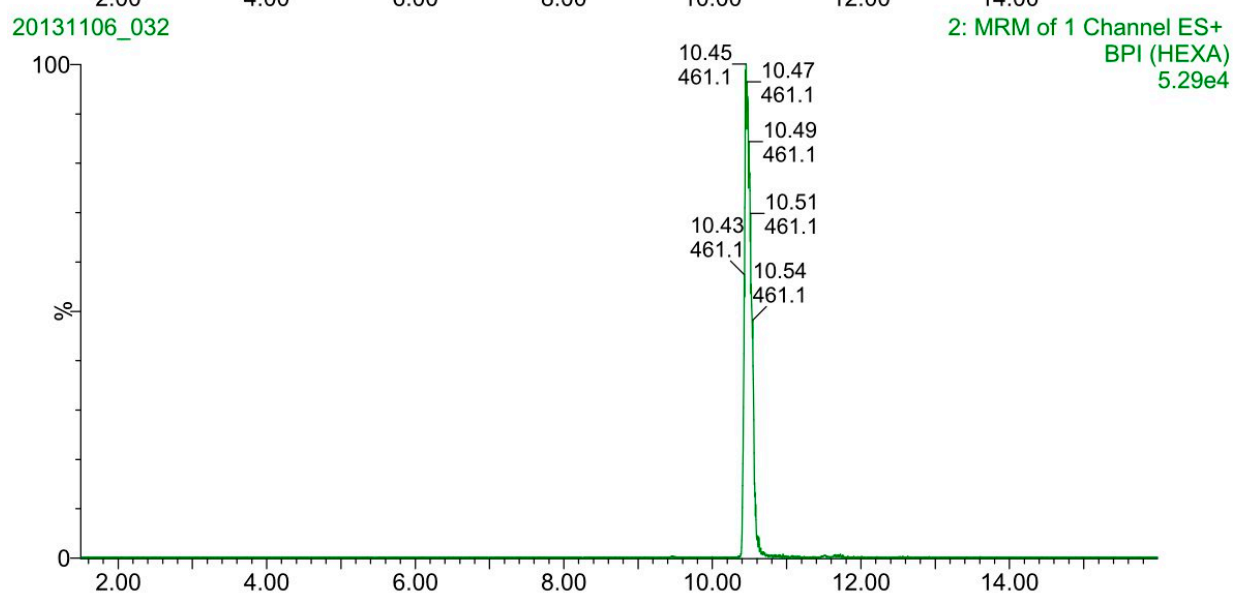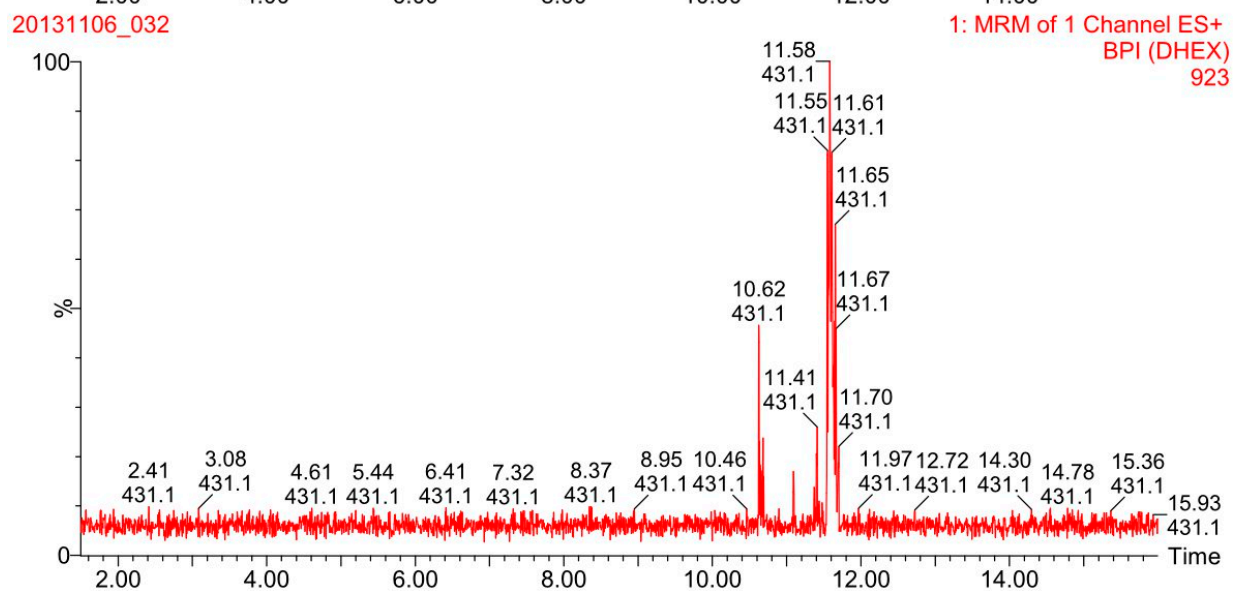

**Figure S213.** UPLC-MS chromatograms of sugars released during the acid hydrolysis of the compound **4**.

lcmz 979 + L-Cys  
20131128\_018

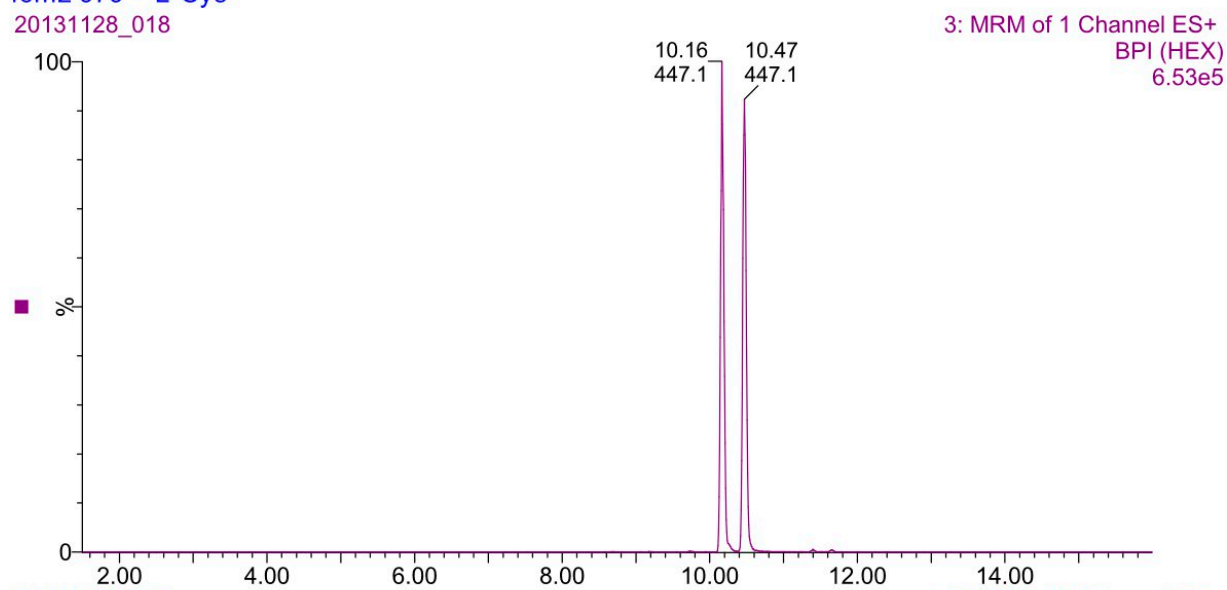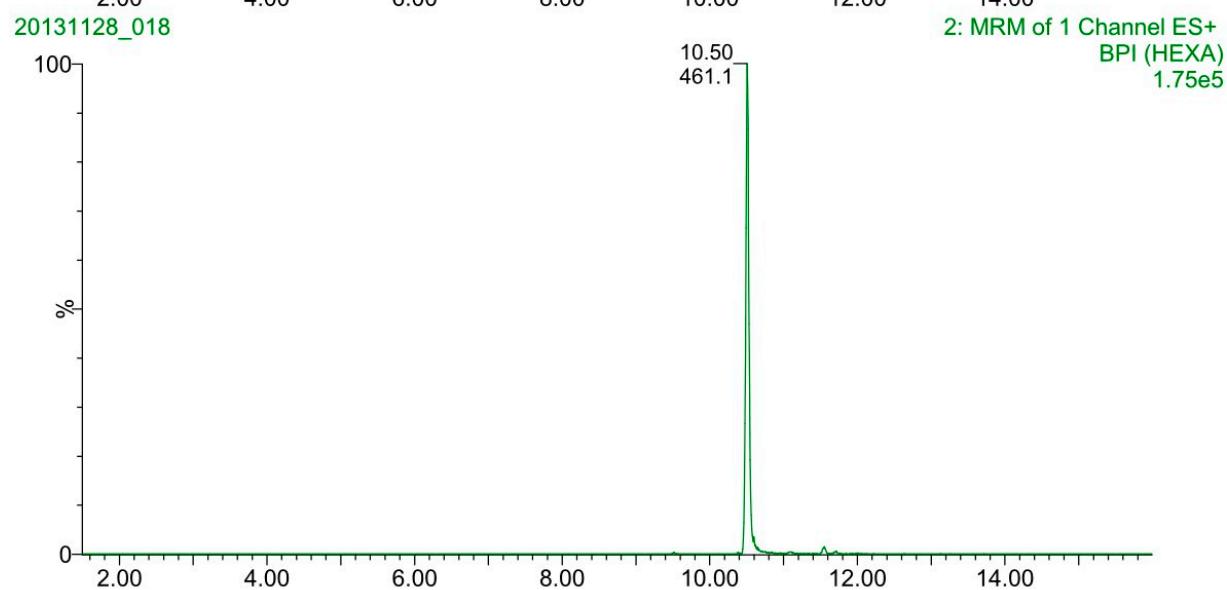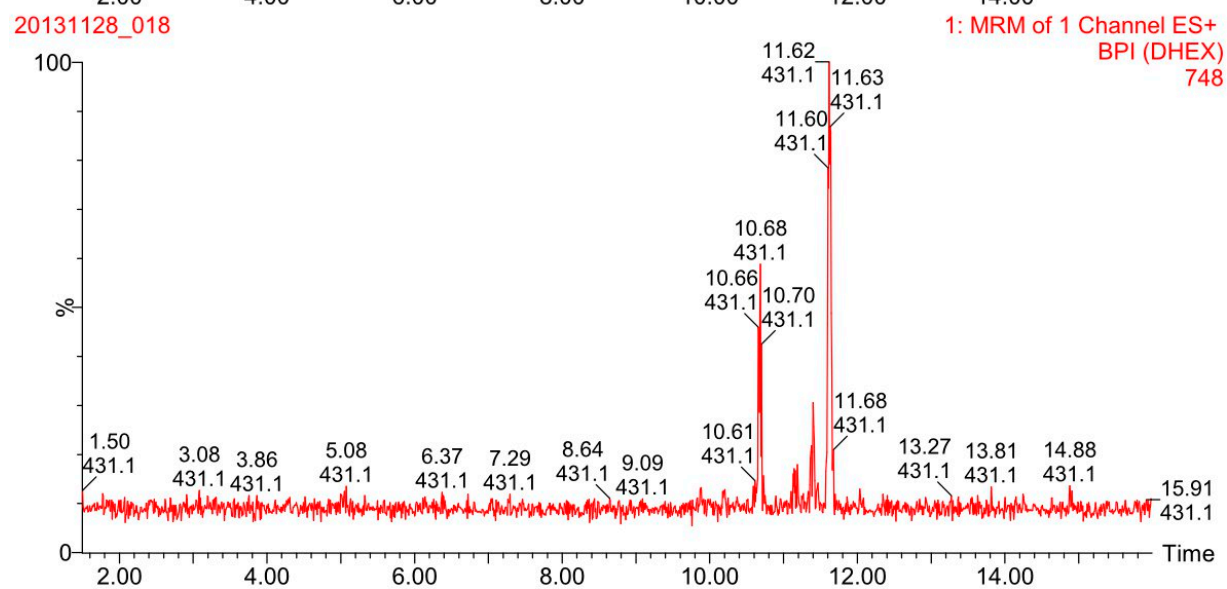

**Figure S214.** UPLC-MS chromatograms of sugars released during the acid hydrolysis of the compound **5**.

lcmz 963 + L-Cys  
20131128\_016

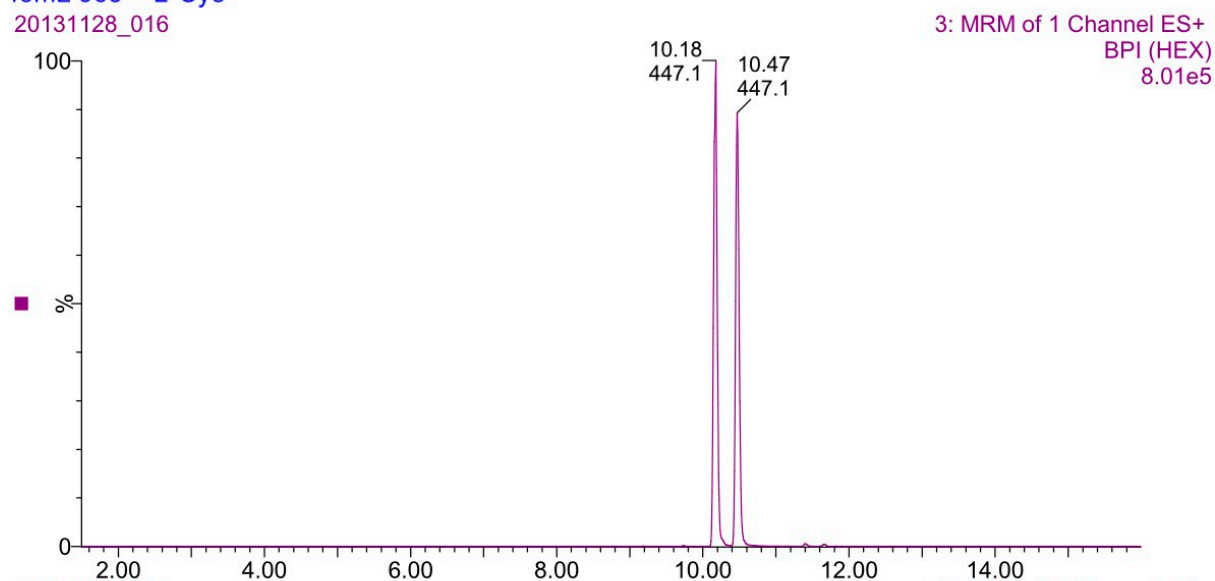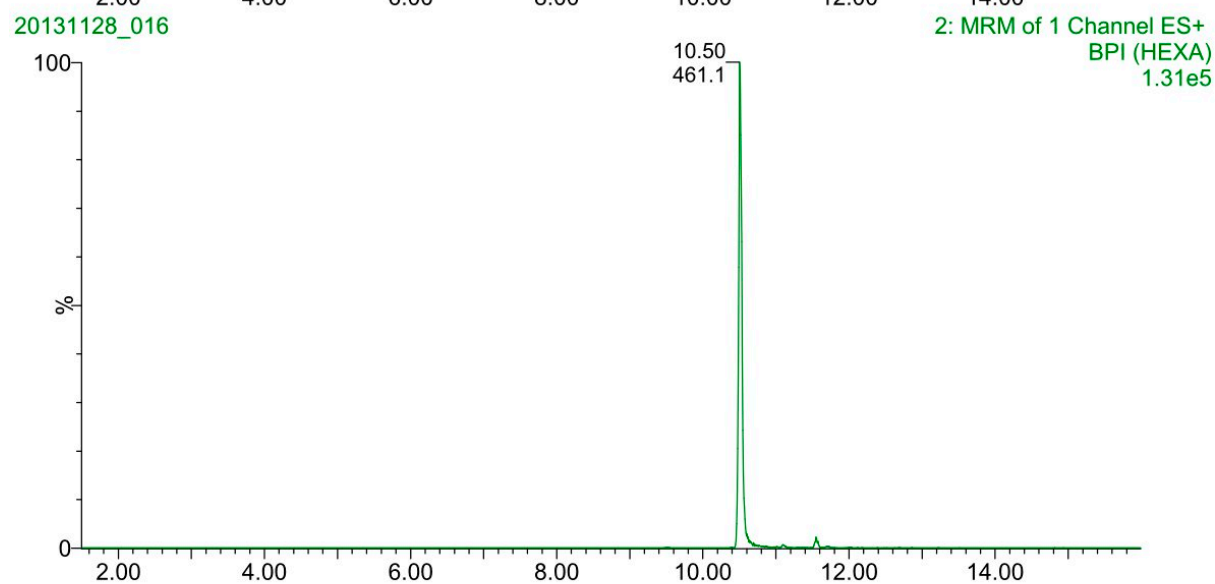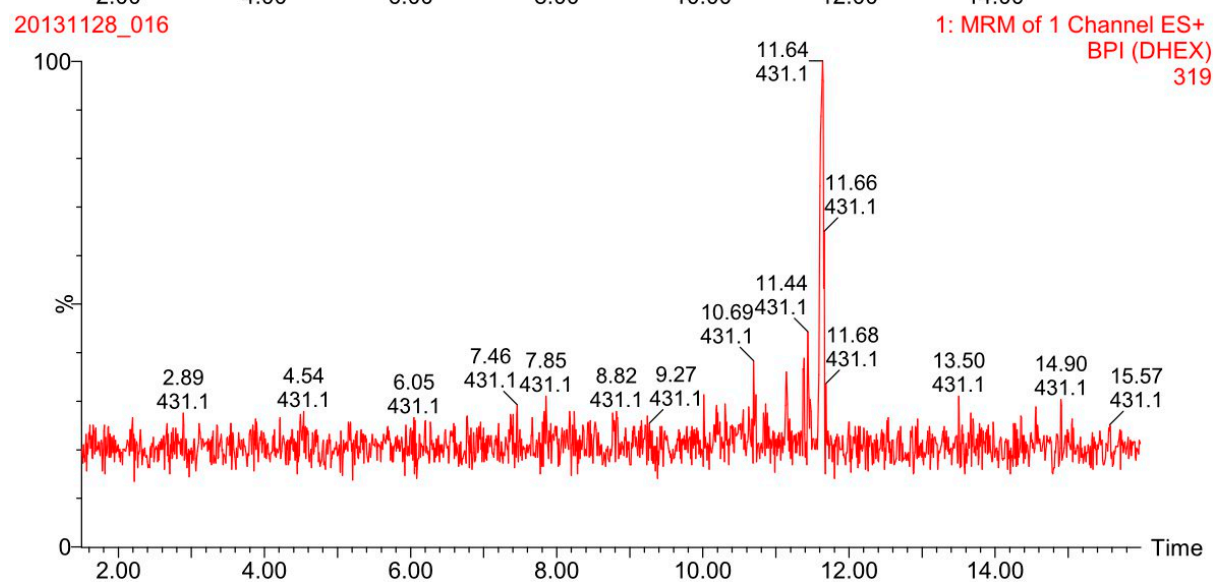

**Figure S215.** UPLC-MS chromatograms of sugars released during the acid hydrolysis of the compound **6**.

lcmz 947 1 + L-Cys  
20131128\_014

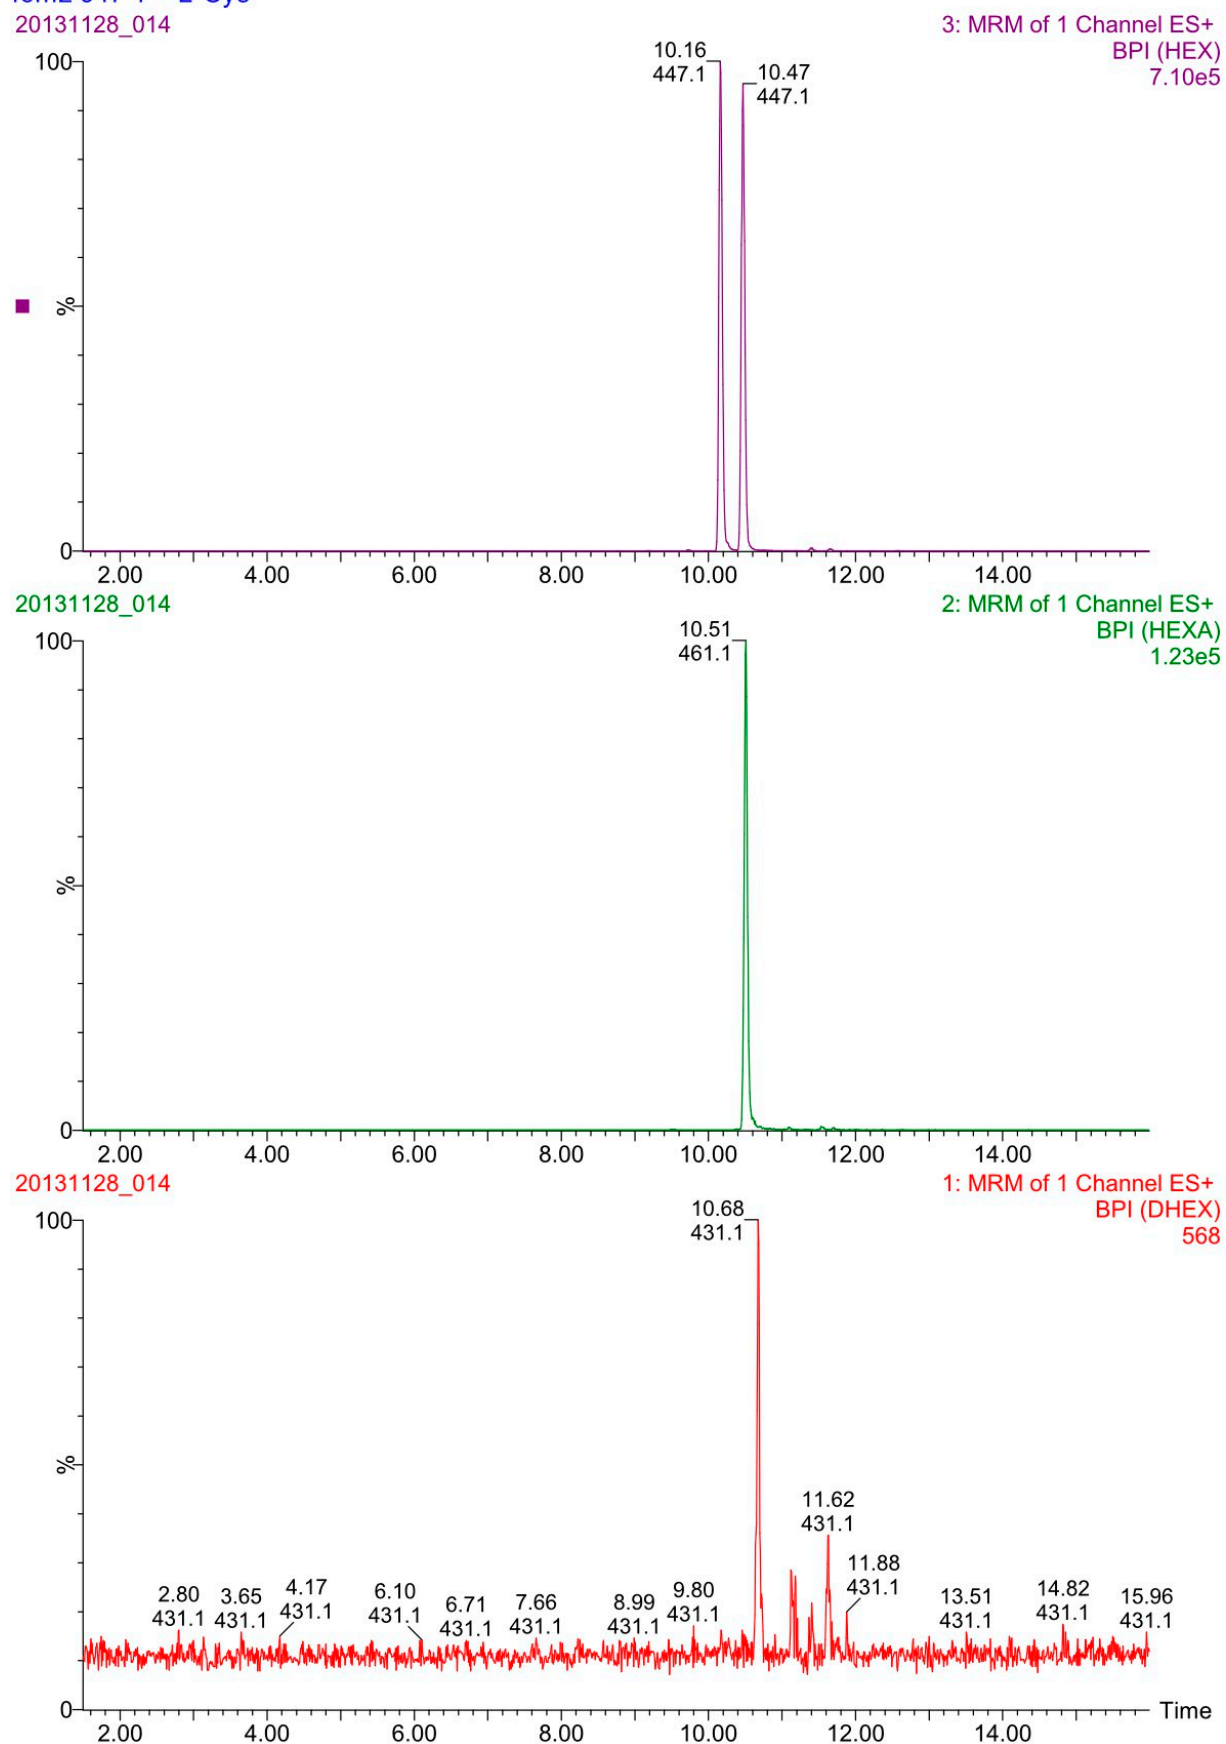

**Figure S216.** UPLC-MS chromatograms of sugars released during the acid hydrolysis of the compound 7.

lcmz\_947\_II + L-Cys  
20131106\_034

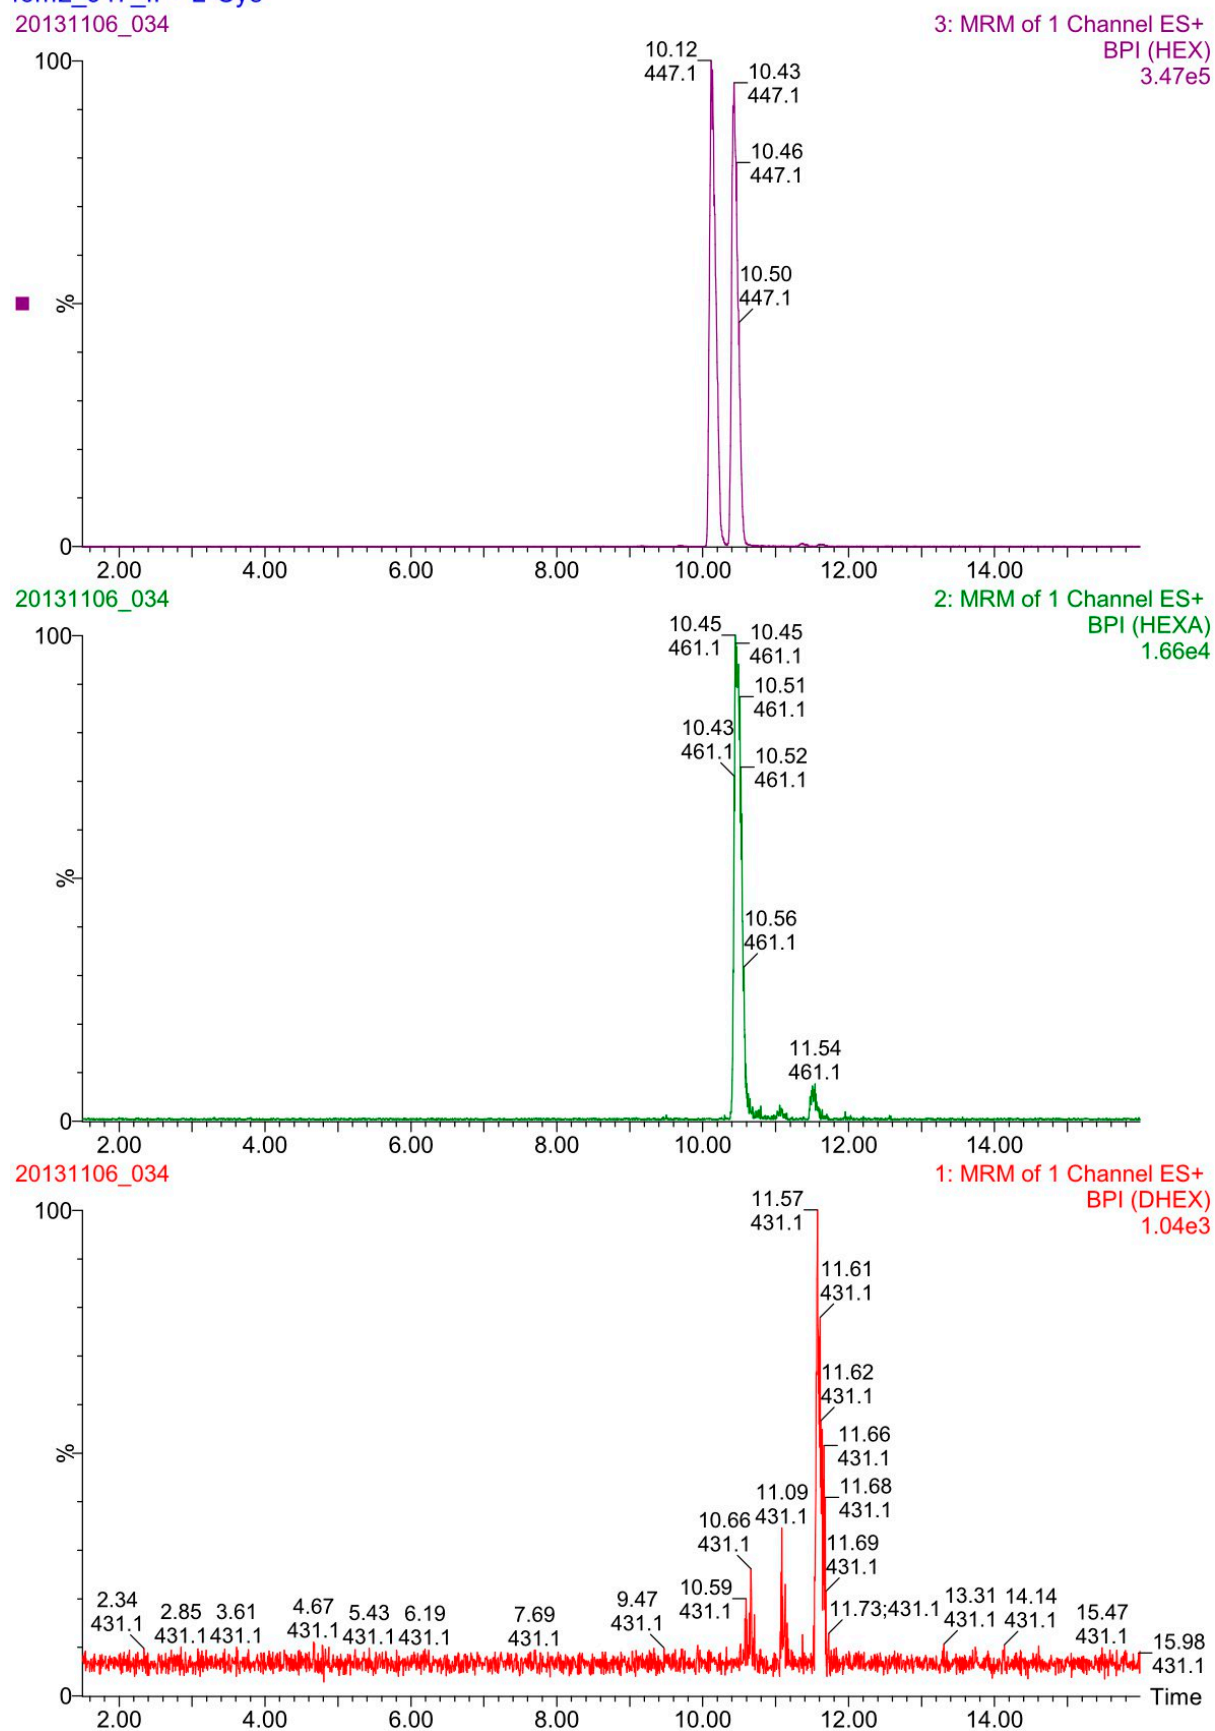

**Figure S217.** UPLC-MS chromatograms of sugars released during the acid hydrolysis of the compound **8**.

lcmz 977 + L-Cys  
20131128\_017

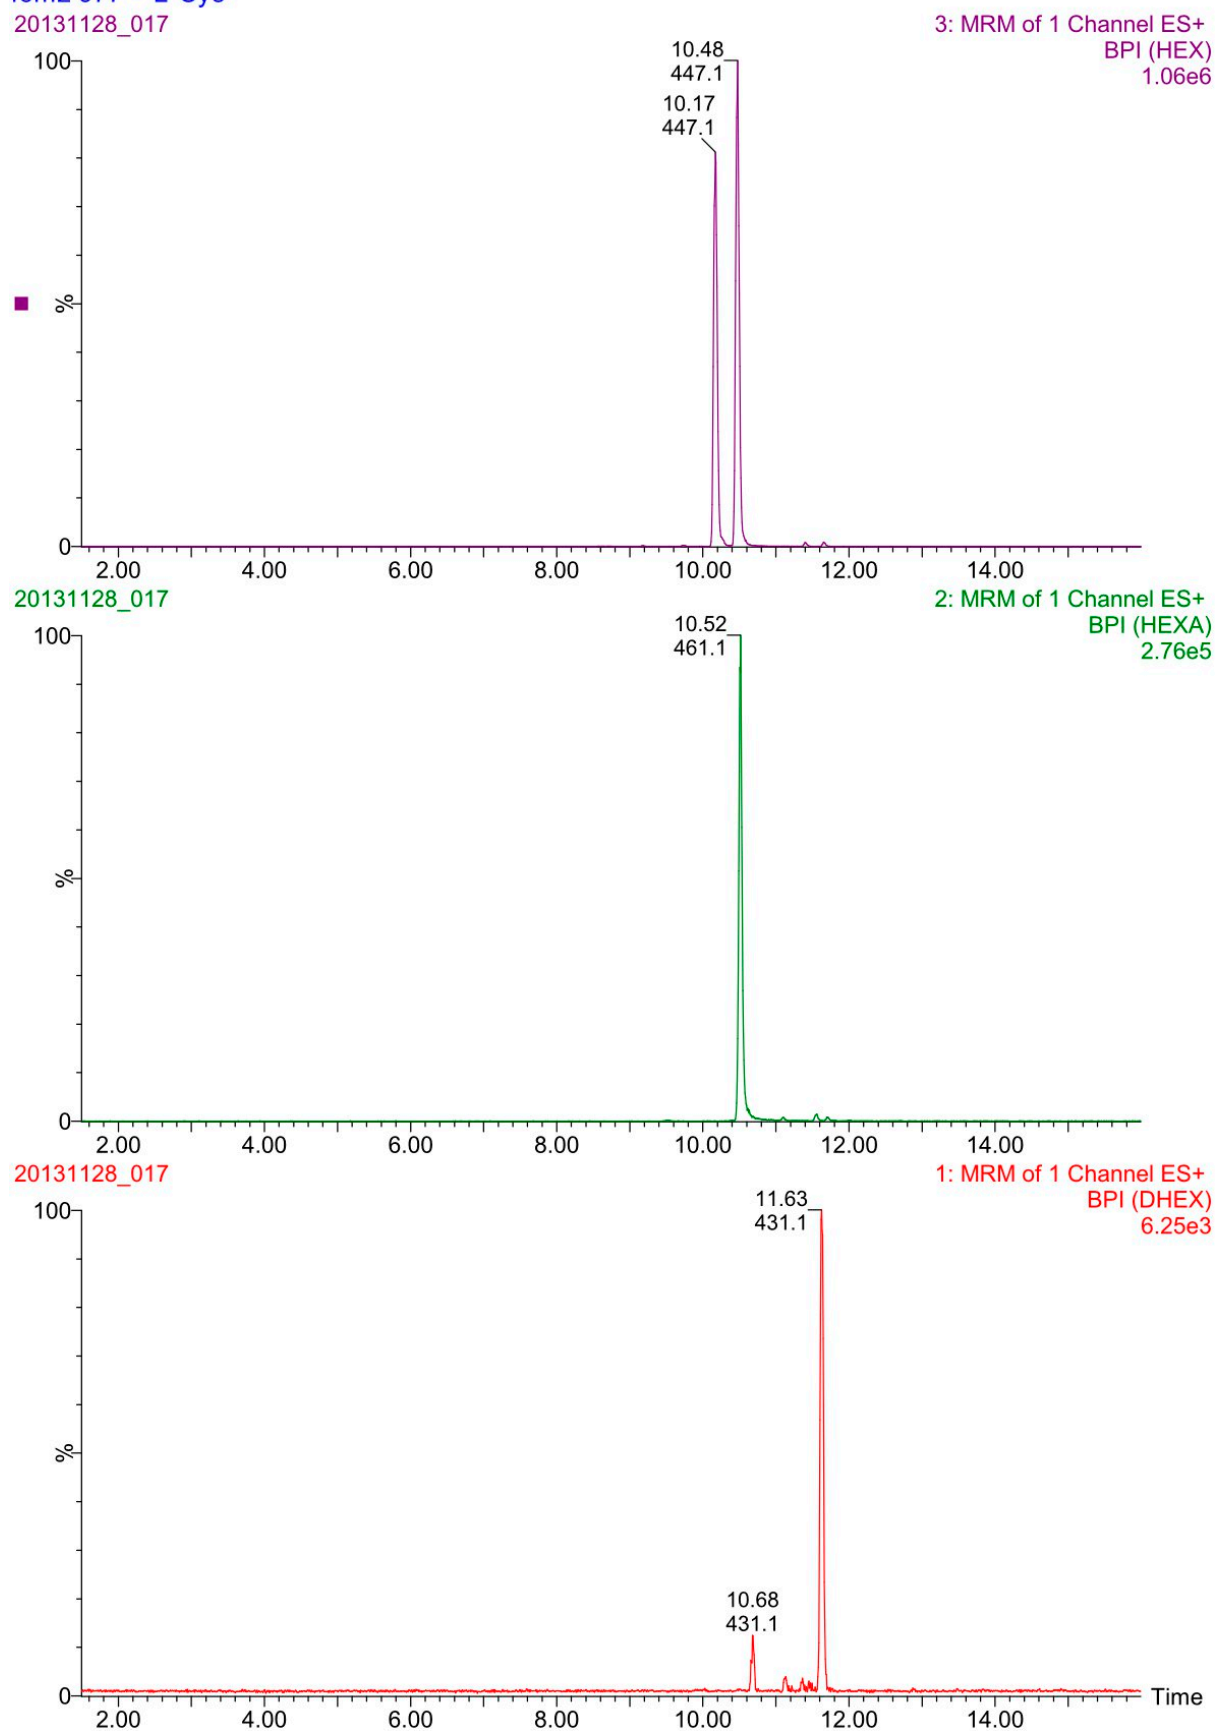

**Figure S218.** UPLC-MS chromatograms of sugars released during the acid hydrolysis of the compound **9**.

lcmz 931 + L-Cys  
20131128\_013

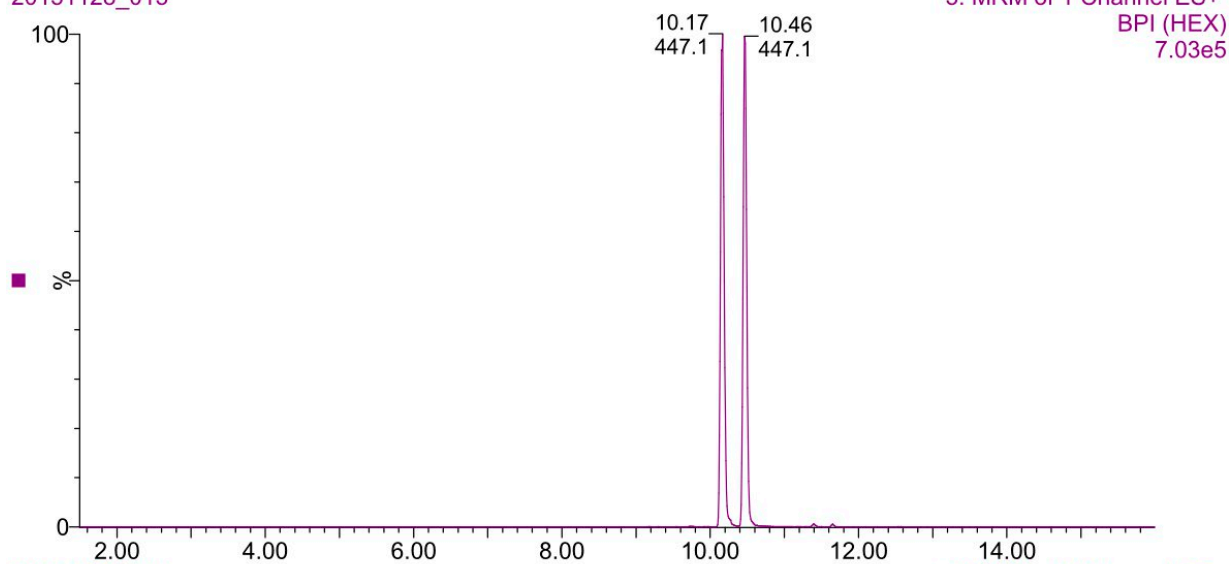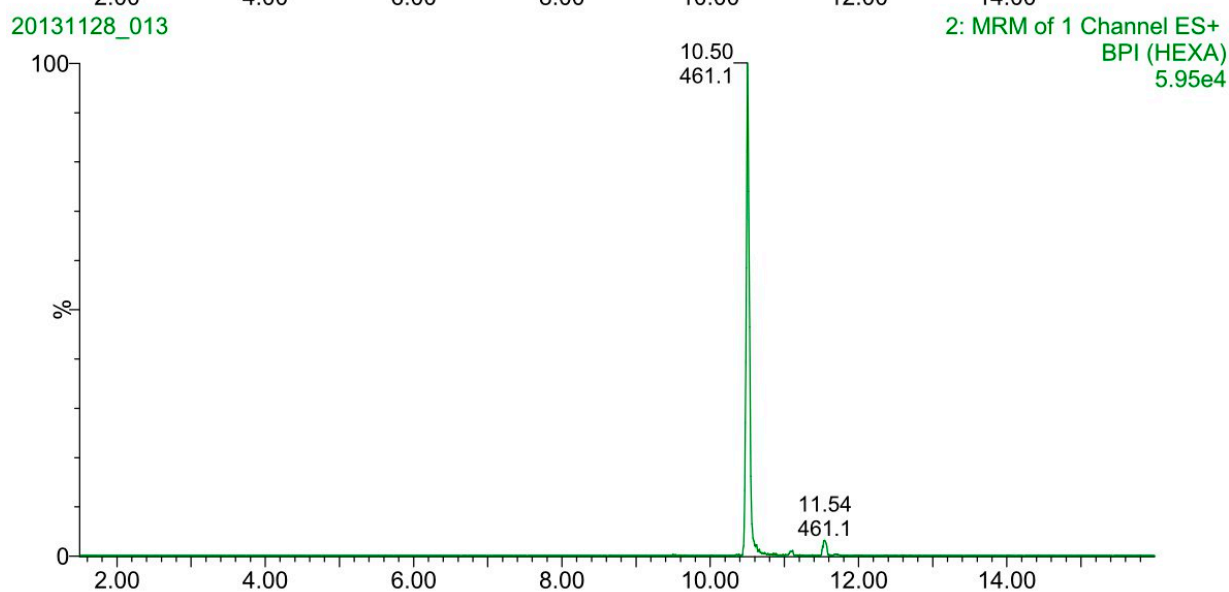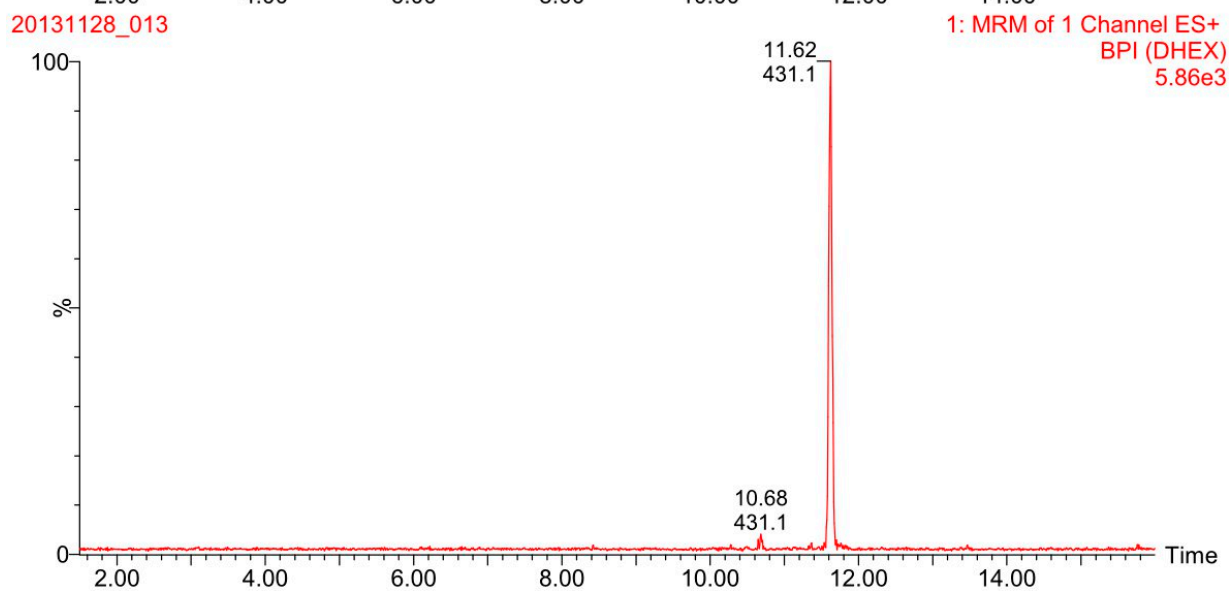



**Figure S219.** UPLC-MS chromatograms of sugars released during the acid hydrolysis of the compound **10**.

lcmz 961 + L-Cys  
20131128\_015

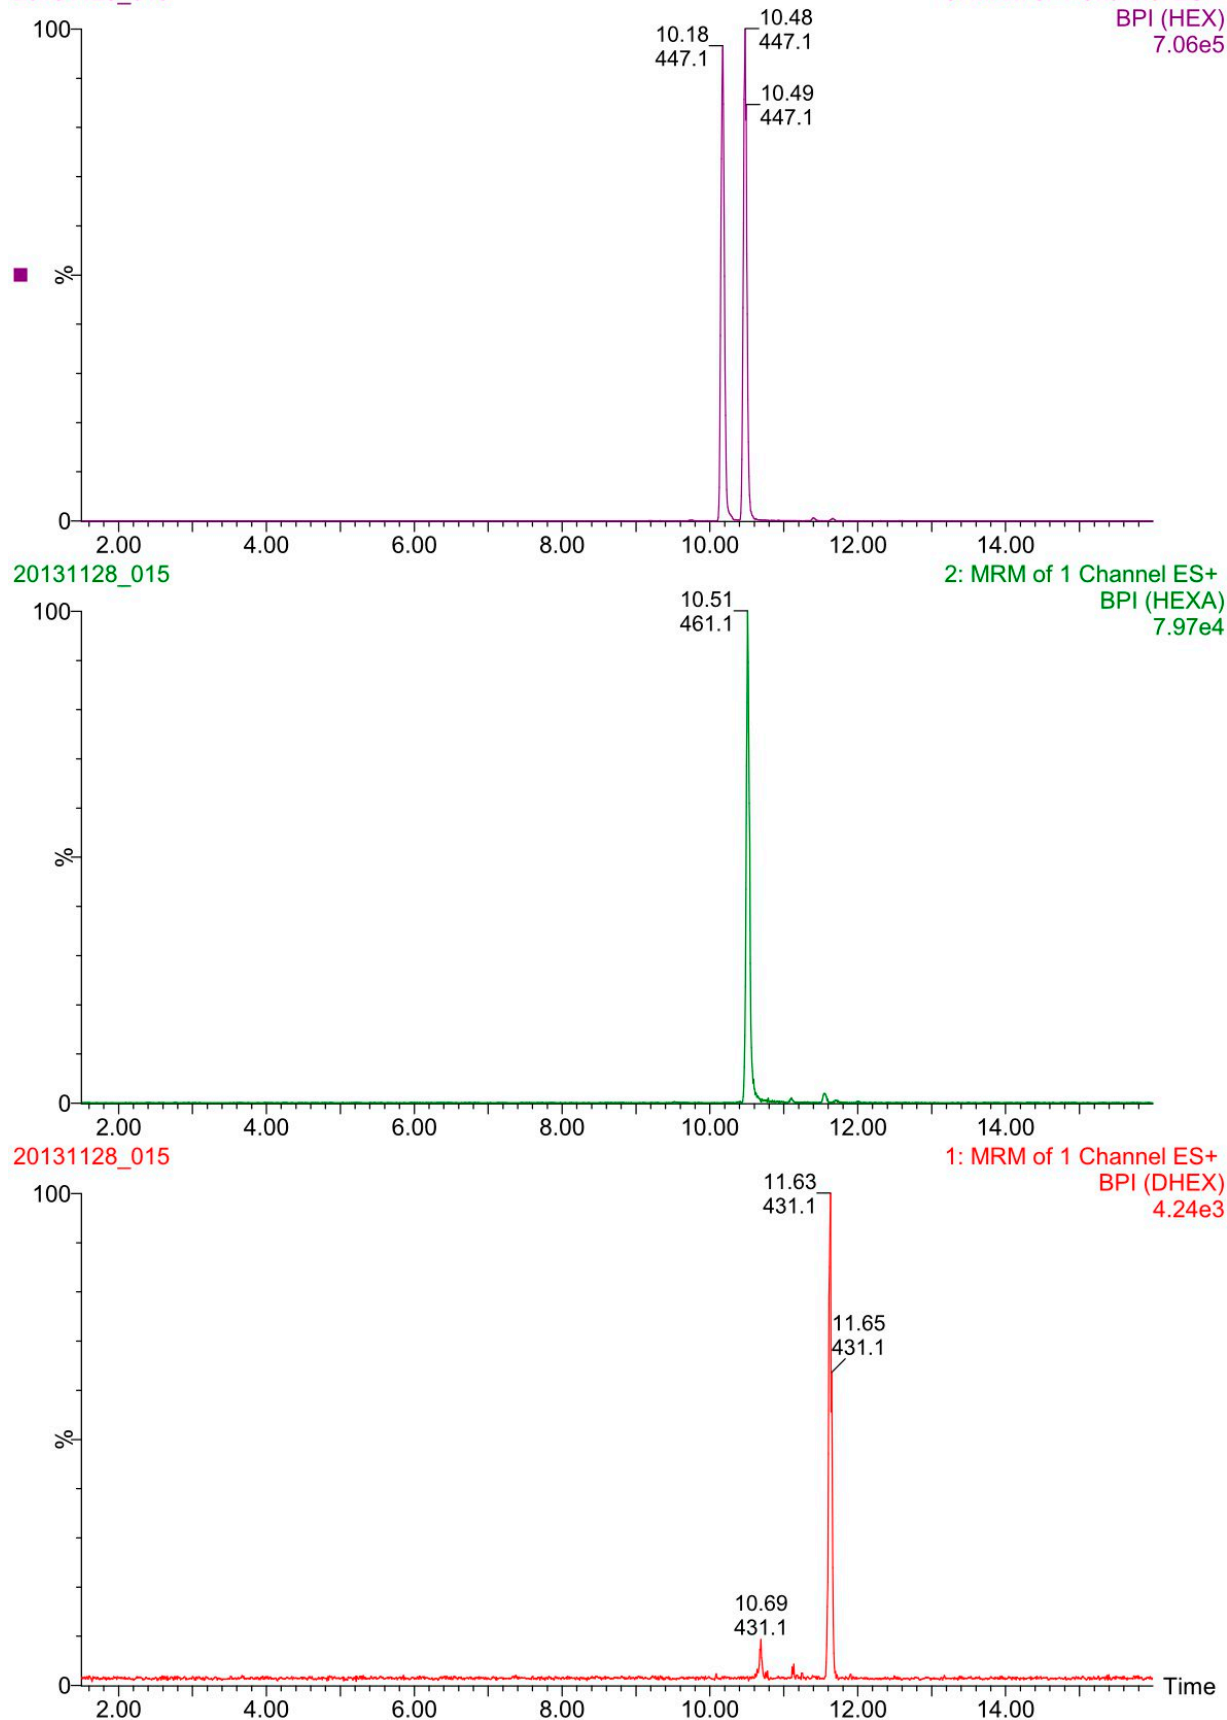



**Figure S220.** UPLC-MS chromatograms of sugars released during the acid hydrolysis of the compound **11**.

lcmz 1047 + L-Cys  
20131128\_019

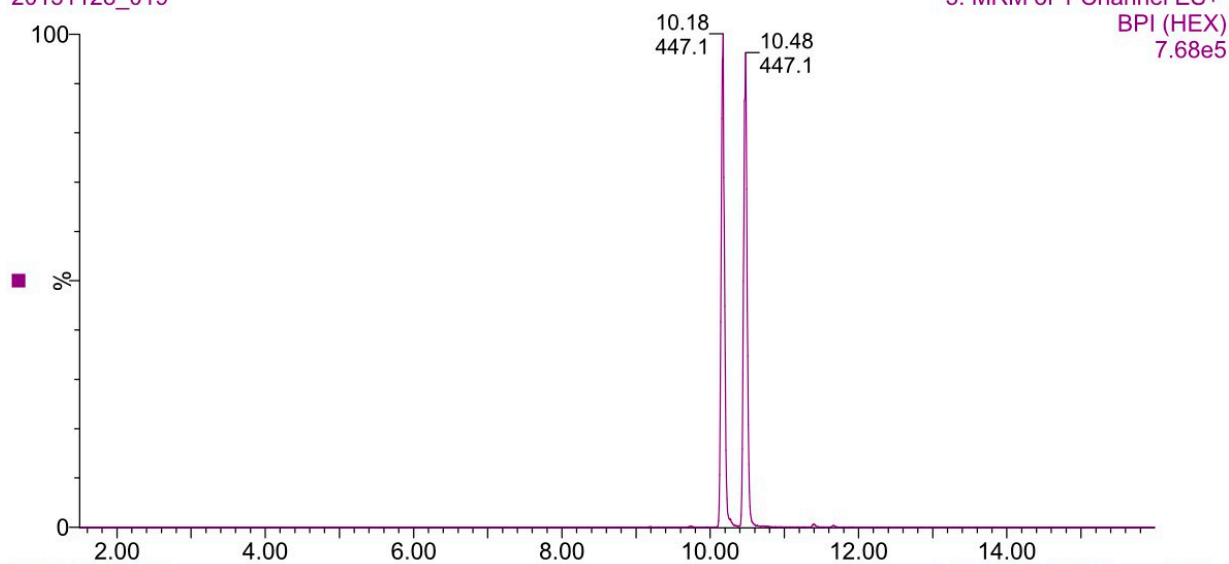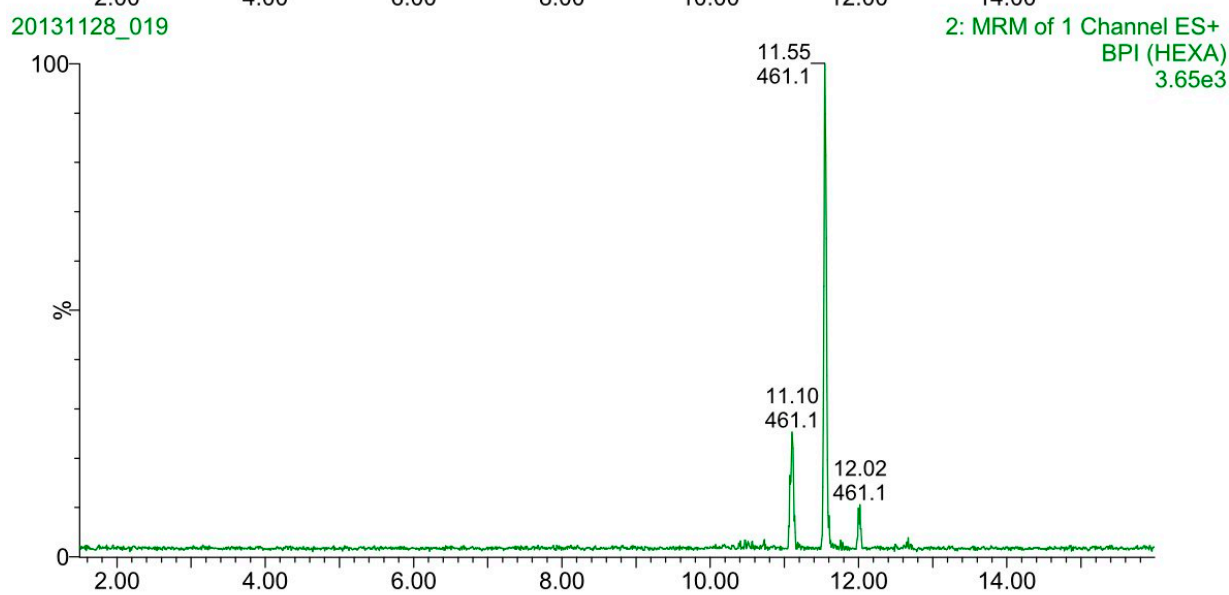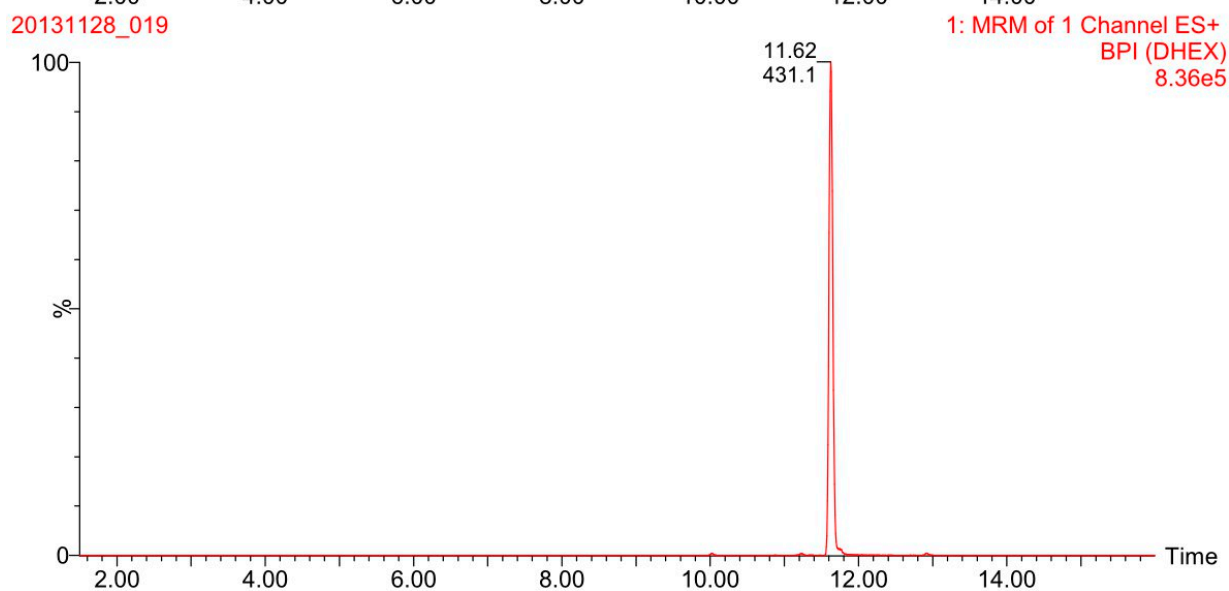

**Figure S221.** UPLC-MS chromatograms of sugars released during the acid hydrolysis of the compound **12**.

lcmz\_1125 + L-Cys  
20131106\_036

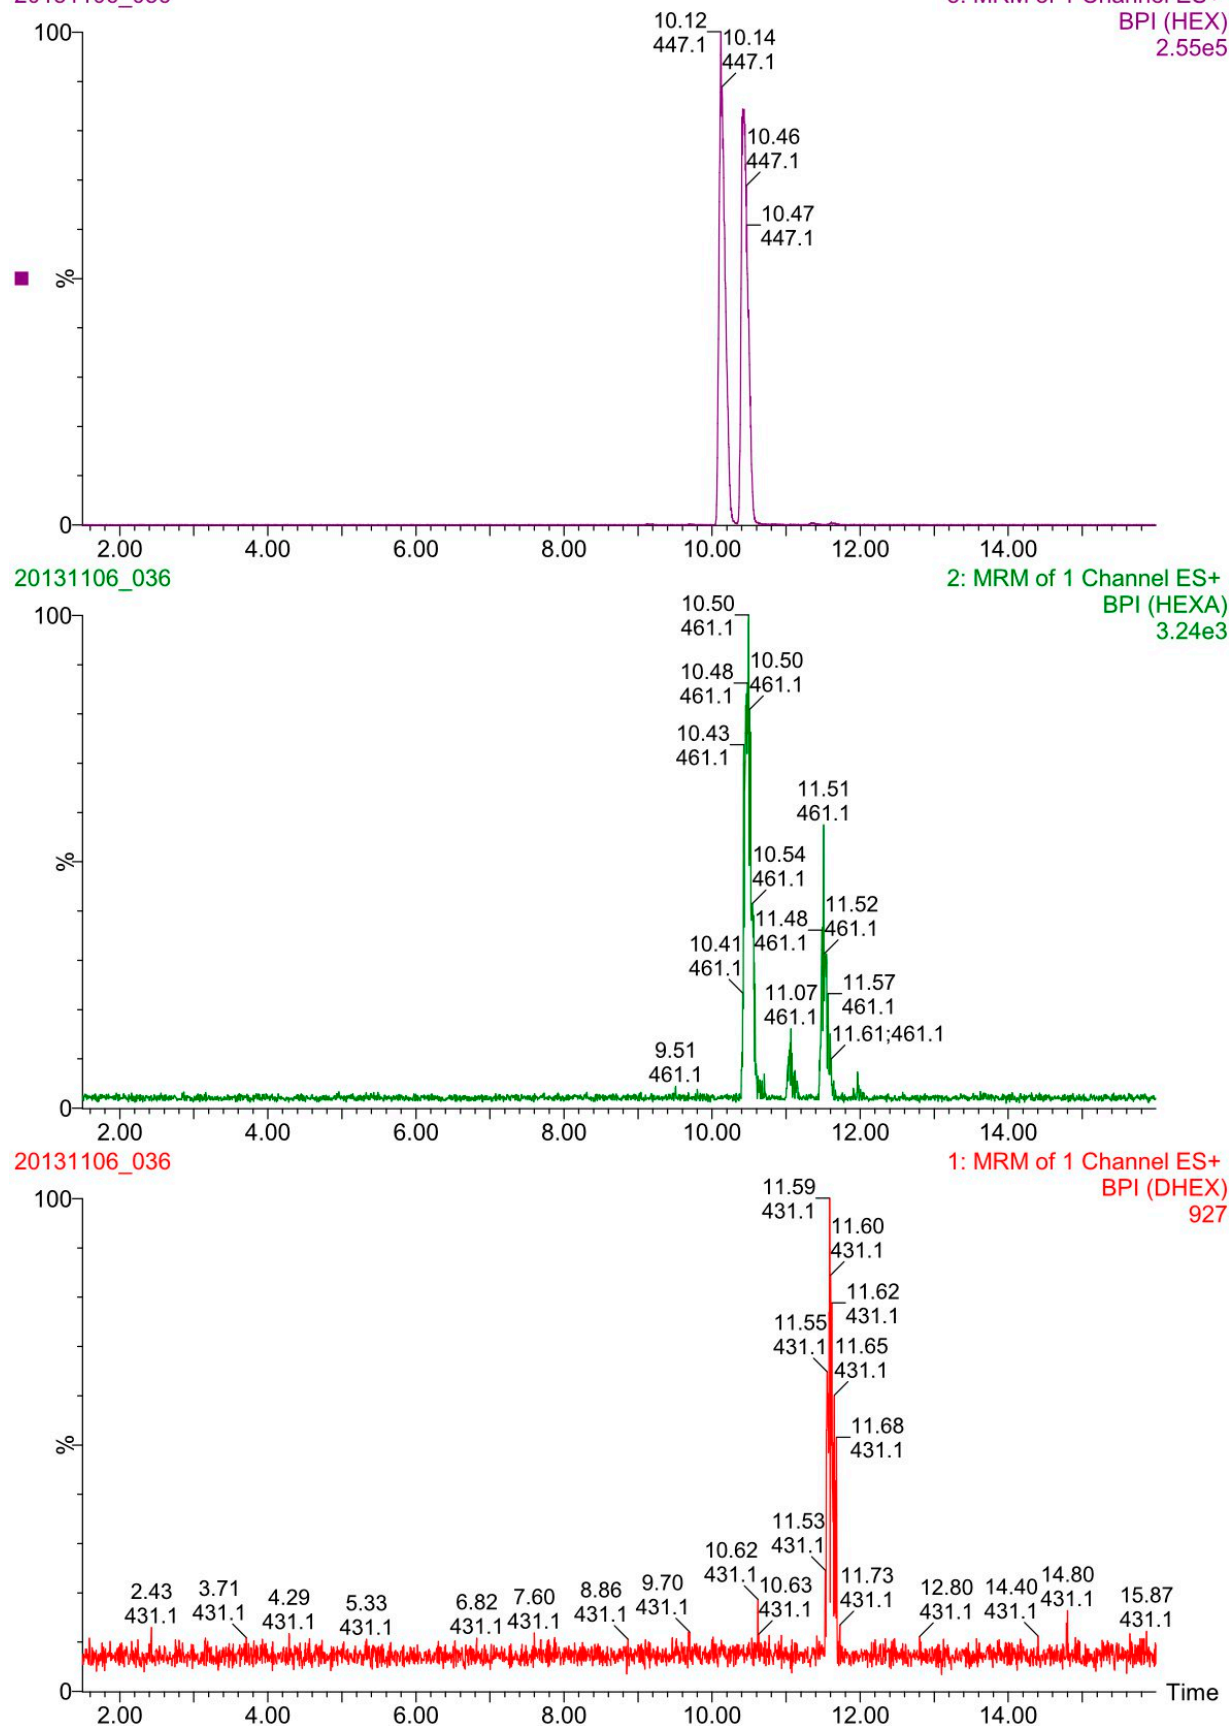

**Figure S222.** UPLC-MS chromatograms of sugars released during the acid hydrolysis of the compound **13**.

lcmz 1109 1 + L-Cys  
20131128\_020

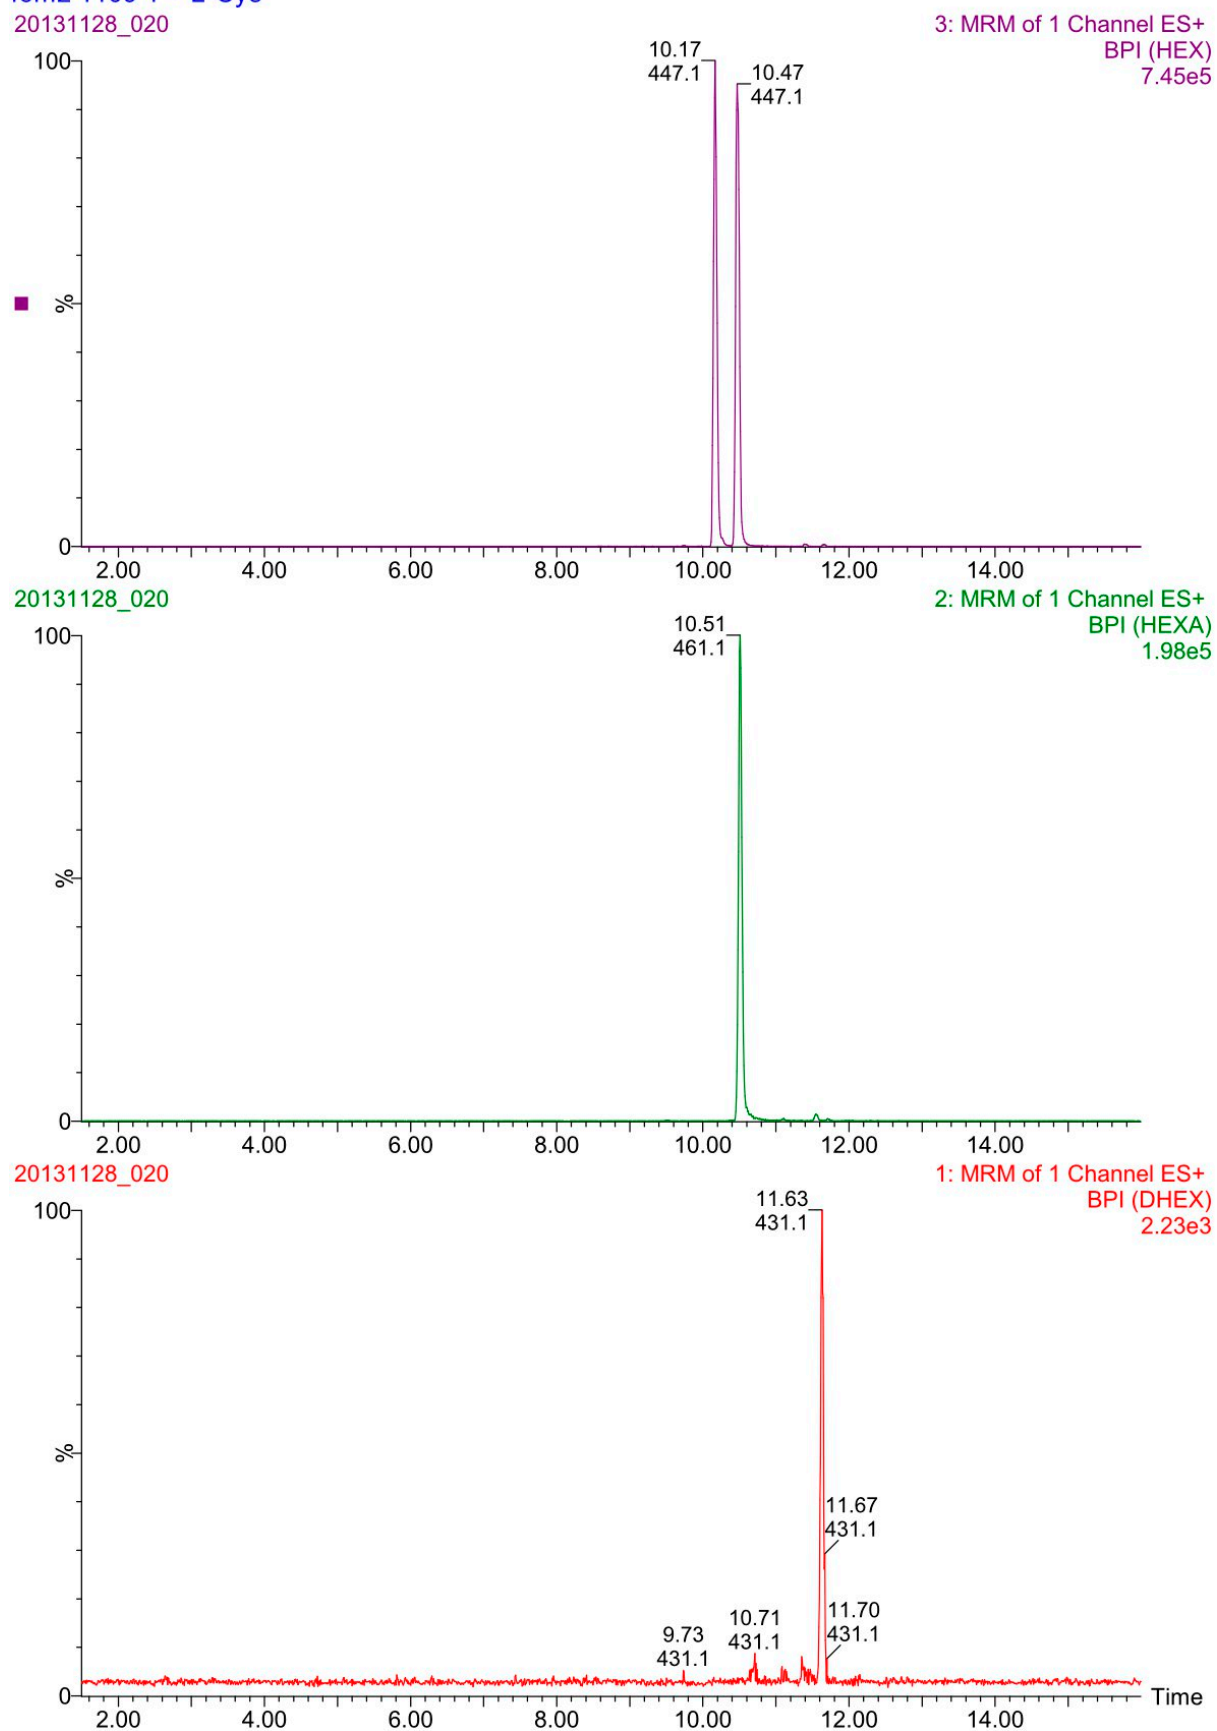

**Figure S223.** UPLC-MS chromatograms of sugars released during the acid hydrolysis of the compound **14**.

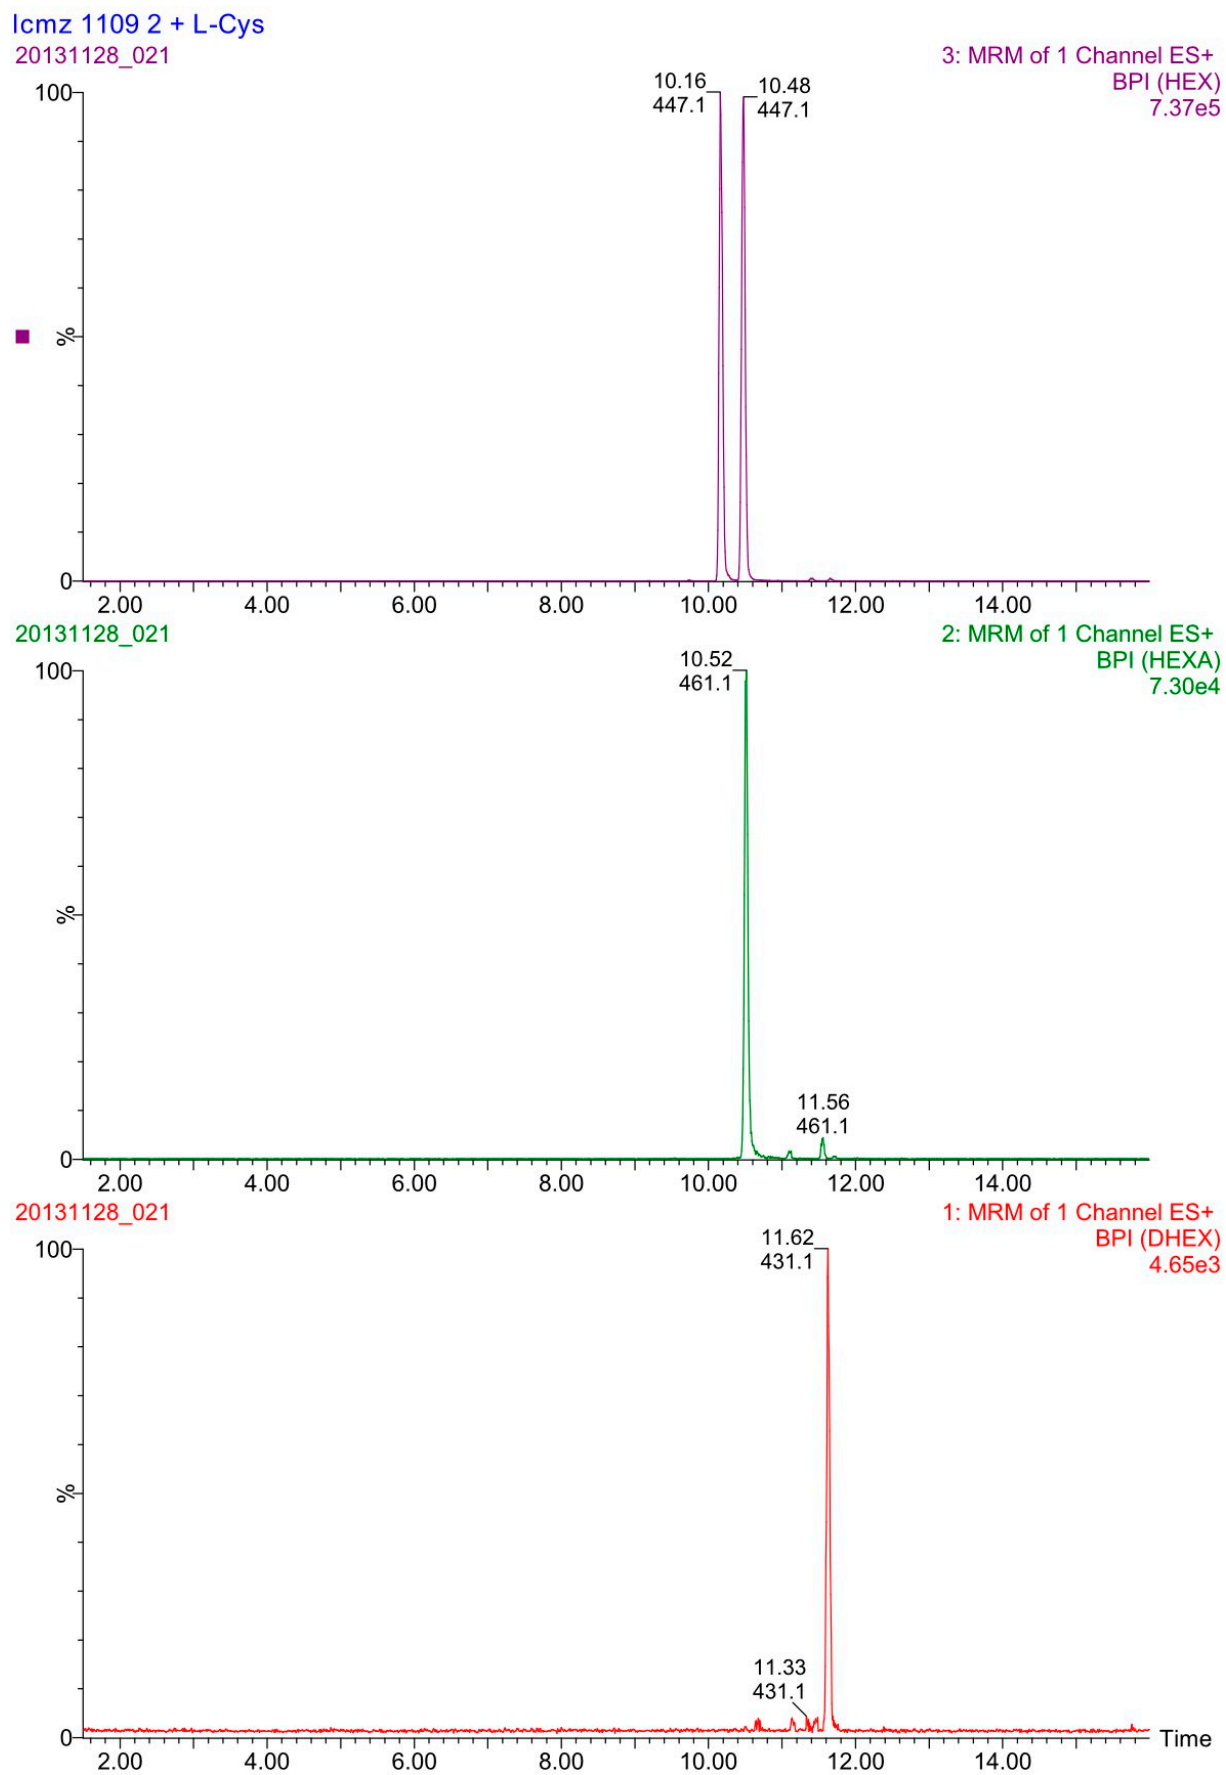

**Figure S224.** UPLC-MS chromatograms of sugars released during the acid hydrolysis of the compound **15**.

L-cysteine + 1109 #3  
20130913\_010

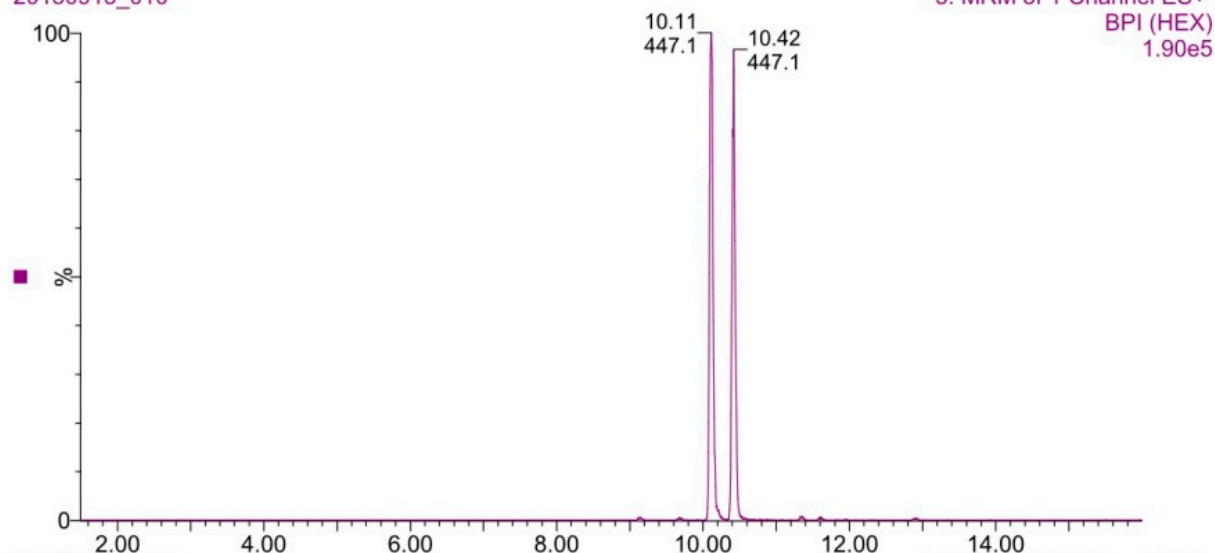

20130913\_010

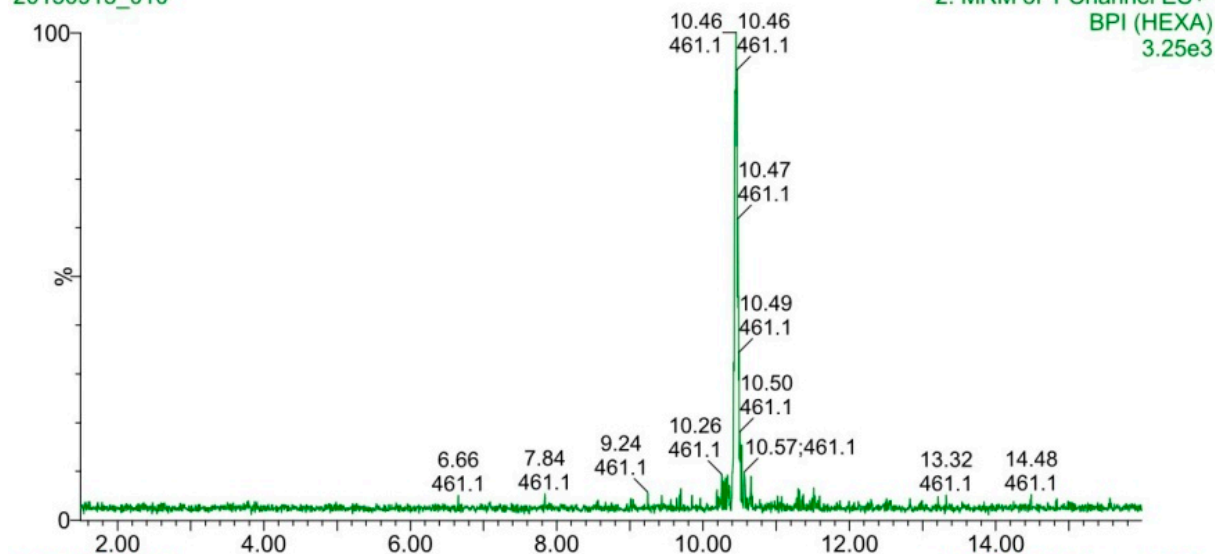

20130913\_010

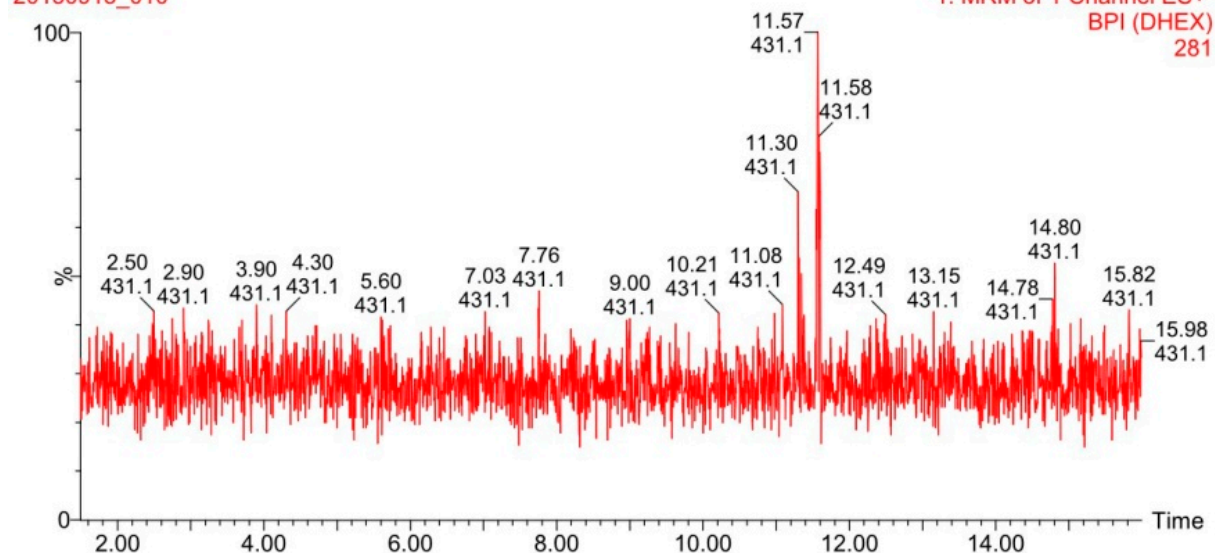

**Figure S225.** UPLC-MS chromatograms of sugars released during the acid hydrolysis of the compound **17**.

lcmz 1139 + L-Cys  
20131128\_022

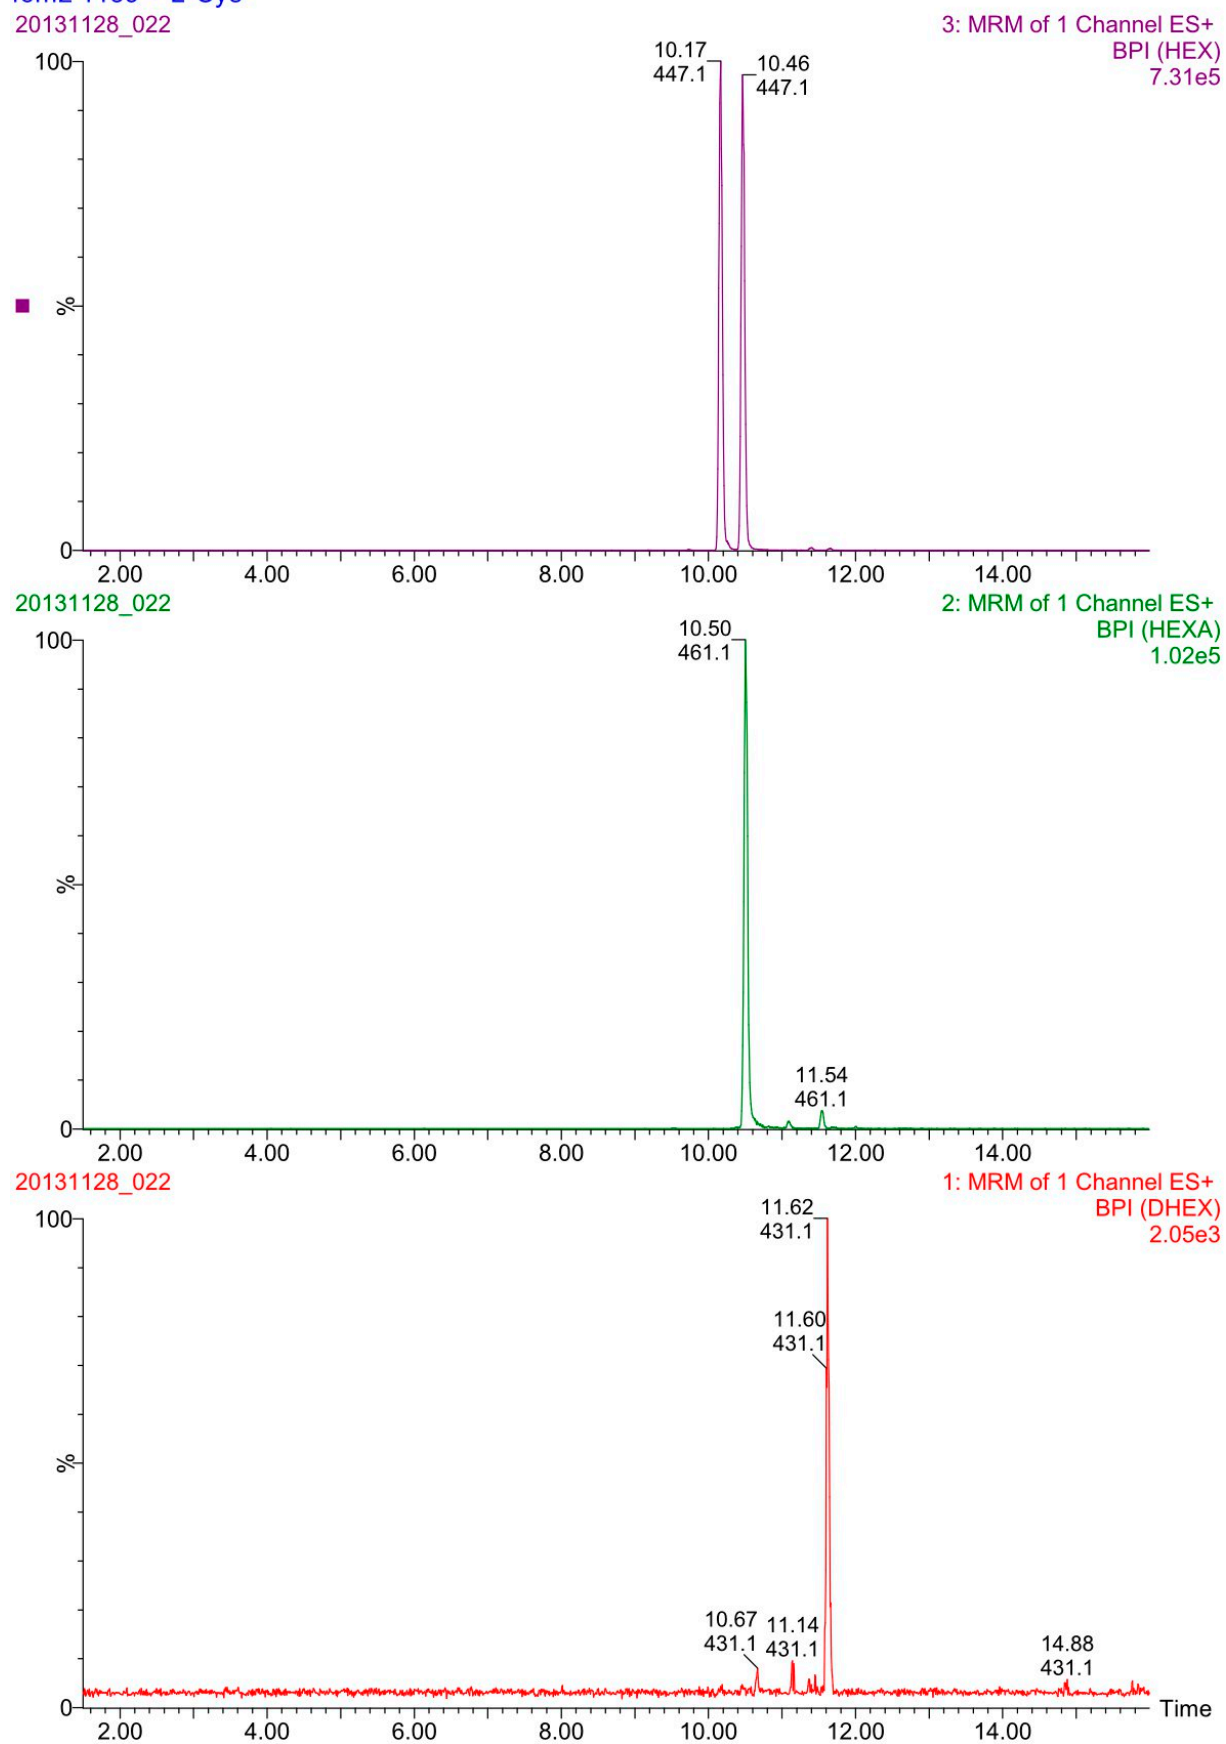

**Figure S226.** UPLC-MS chromatograms of sugars released during the acid hydrolysis of the compound **18**.

lcmz\_1093 + L-Cys  
20131106\_035

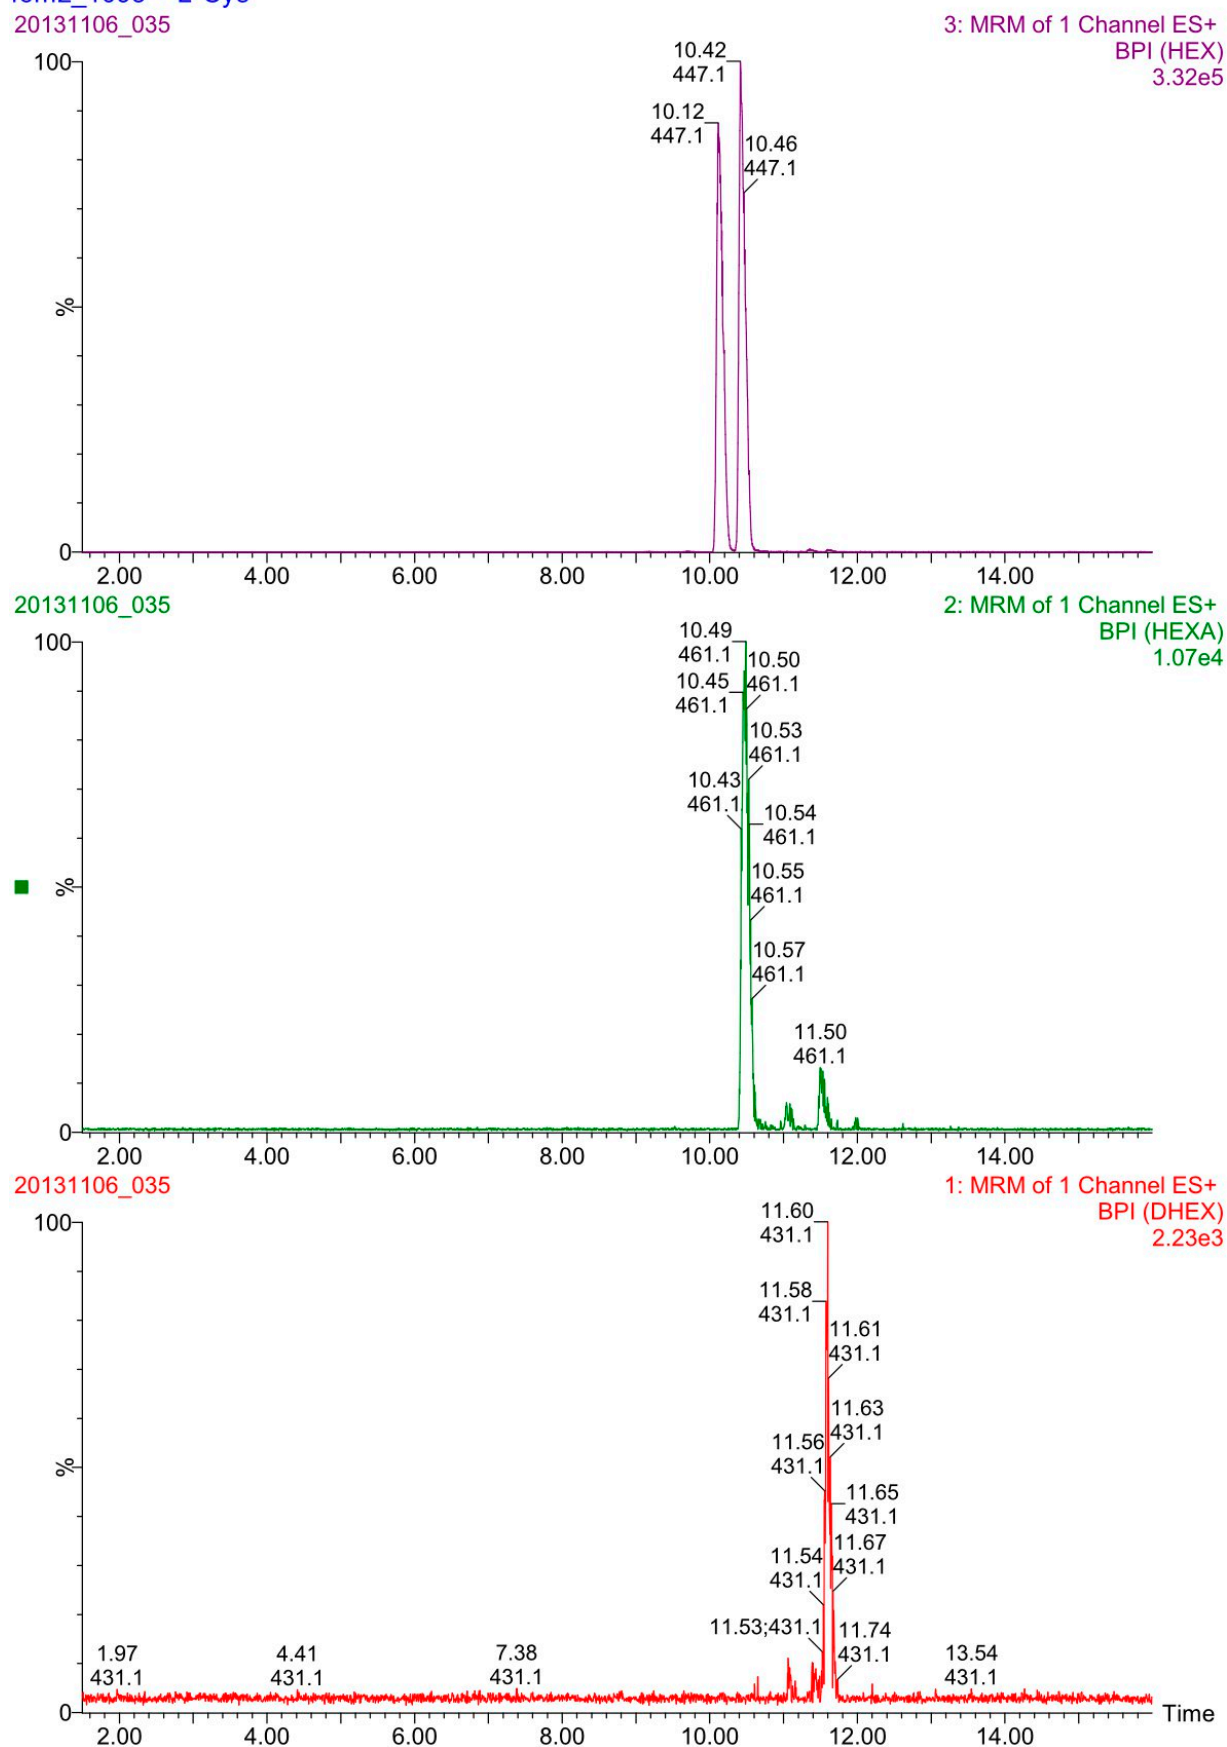

**Figure S227.** UPLC-MS chromatograms of the methanol extract of lentil seeds (var. Tina), and the UV spectrum of the dominant phenolic compound.

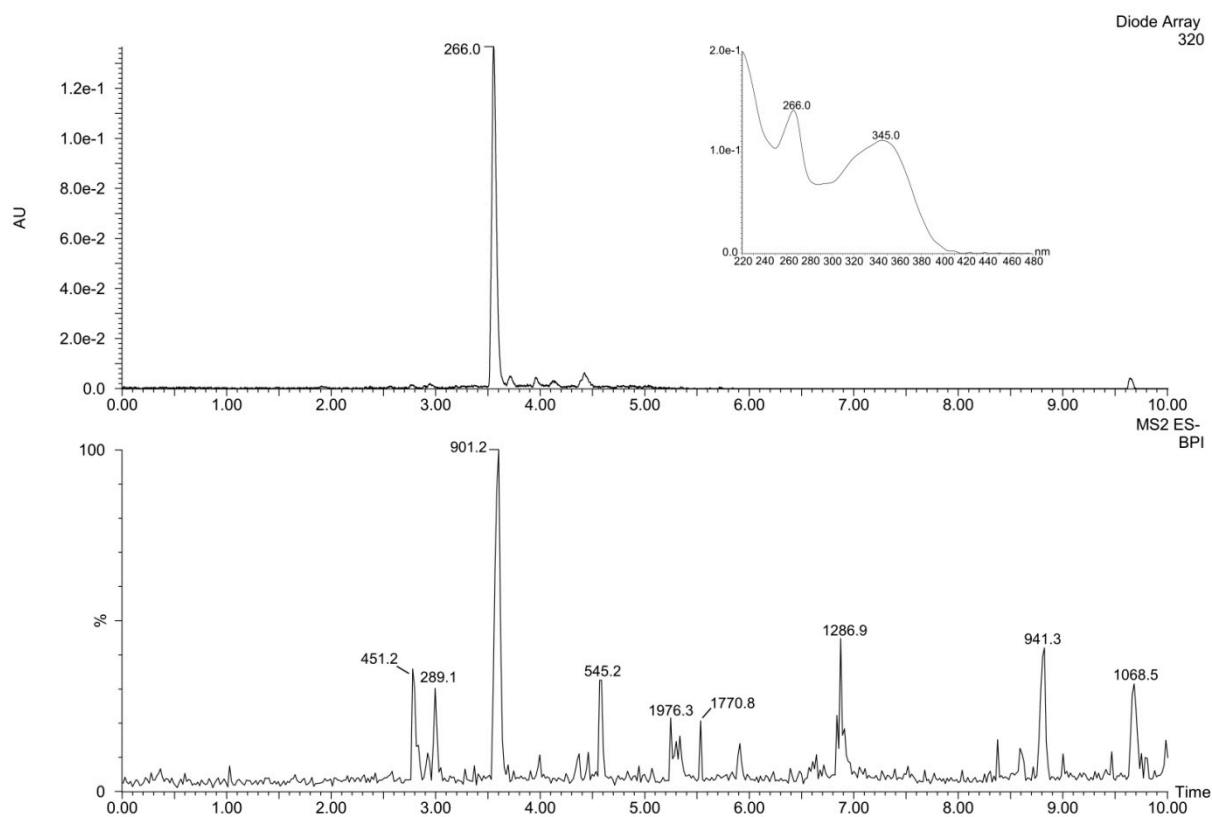

Supplement: s1 [file s1]
